# Supplementary material for: Genetic Mechanisms in Apc-Mediated Mammary Tumorigenesis
Source: PLoS Genet. 2009 Feb 6;5(2):e1000367. doi: 10.1371/journal.pgen.1000367 (PMC2629572; doi:10.1371/journal.pgen.1000367)
Supplement: Dataset S1 — Differential gene expression between tumors and control samples. Information on differential gene expression between tumors and control samples for 32,322 probes. (21 MB XLS) [file pgen.1000367.s005.xls]

## Sheet: tumors_vs_controls_list_with_ex
Accession	Upregulated Class	T-Test	Fold Change	control-tumor Calls	control Mean	control Stddev	tumor Mean	tumor Stddev	control1	control2	control3	tumor1	tumor2	tumor3	Symbol	Description	Chromosome	Cytoband	Chromosome Location	GenBank	LocusLink	PubMed	Gene Ontology	Pathway	Description
1424187_at	control	79.3394	85.2703	PPP-AAA	2765.6	42.4986	32.43	41.8818	2805.2	2720.7	2770.9	12.1	80.6	4.6	Ccdc80	coiled-coil domain containing 80	16	16 B5	45013384	BG074158	67896	8889548, 10349636, 10922068, 11042159, 11076861, 11217851, 11812002, 12466851, 12477932, 15325258, 16141072, 16141073			gb:BG074158 /DB_XREF=gi:12556716 /DB_XREF=H3131D09-3 /CLONE=H3131D09 /FEA=FLmRNA /CNT=132 /TID=Mm.181074.1 /TIER=Stack /STK=8 /UG=Mm.181074 /LL=67896 /UG_GENE=2610001E17Rik /UG_TITLE=RIKEN cDNA 2610001E17 gene /FL=gb:AB075019.1
1454909_at	control	51.2556	4.203	PPP-PPP	3134.6	34.8155	745.8	72.8295	3148.4	3095	3160.4	670.2	751.7	815.5	Tacc1	transforming, acidic coiled-coil containing protein 1	8	8 A2	-26620097	BQ176888	320165	8889548, 10349636, 11042159, 11076861, 11217851, 12466851, 12477932, 15207008, 15226440, 15782199, 16141072, 16141073, 16496324	GO:0007049: cell cycle, GO:0051301: cell division, GO:0005634: nucleus, GO:0005515: protein binding		gb:BQ176888 /DB_XREF=gi:20352380 /DB_XREF=UI-M-DJ2-bwa-a-15-0-UI.s1 /CLONE=UI-M-DJ2-bwa-a-15-0-UI /FEA=EST /CNT=82 /TID=Mm.38492.1 /TIER=Stack /STK=36 /UG=Mm.38492 /LL=101984 /UG_GENE=AA960202 /UG_TITLE=expressed sequence AA960202
1436044_at	control	45.1932	19.786	PPP-PPP	3589.83	120.241	181.43	51.0492	3479.2	3717.8	3572.5	140.4	238.6	165.3	Scn7a	sodium channel, voltage-gated, type VII, alpha	2	2 C1.3	-66476150	BB452990	20272	7590978, 7982916, 8250913, 8779936, 9726281, 10198179, 10349636, 11027237, 11042159, 11076861, 11217851, 11992118, 12213645, 12466851, 12650985, 15496663, 16141072, 16141073, 16223844	GO:0006811: ion transport, GO:0006812: cation transport, GO:0006814: sodium ion transport, GO:0006816: calcium ion transport, GO:0001518: voltage-gated sodium channel complex, GO:0016020: membrane, GO:0016021: integral to membrane, GO:0005216: ion channel activity, GO:0005248: voltage-gated sodium channel activity, GO:0005261: cation channel activity, GO:0005262: calcium channel activity		gb:BB452990 /DB_XREF=gi:16425734 /DB_XREF=BB452990 /CLONE=D130020M11 /FEA=EST /CNT=30 /TID=Mm.38127.1 /TIER=Stack /STK=11 /UG=Mm.38127 /LL=68745 /UG_GENE=1110034K09Rik /UG_TITLE=RIKEN cDNA 1110034K09 gene
1459269_at	control	41.4073	3.432	PPP-AAP	195.17	4.4411	56.87	3.7072	191.8	193.5	200.2	56.6	53.3	60.7	Penk1	preproenkephalin 1	4	4 A1	-4060682	BB356493	18619	1537850, 2011497, 2355920, 2784565, 2938259, 7631421, 7752808, 8603595, 8750842, 8849726, 8861630, 9191109, 9653660, 9746745, 9876181, 10349636, 10357937, 10520752, 10540203, 10808051, 10998124, 11042159, 11060228, 11076861, 11125007, 11172058, 11180952, 11217851, 11356033, 12223579, 12466851, 12477932, 12486185, 12724834, 12864972, 14975719, 15197532, 15217369, 15388297, 15689546, 15813947, 1609…	GO:0001662: behavioral fear response, GO:0007218: neuropeptide signaling pathway, GO:0007610: behavior, GO:0019233: sensory perception of pain, GO:0001515: opioid peptide activity		gb:BB356493 /DB_XREF=gi:16405752 /DB_XREF=BB356493 /CLONE=C030015F15 /FEA=EST /CNT=2 /TID=Mm.208778.1 /TIER=ConsEnd /STK=2 /UG=Mm.208778 /UG_TITLE=ESTs
1444525_at	control	40.0716	6.1669	PPP-PPP	482.87	14.8399	78.3	9.2504	499.4	470.7	478.5	85.9	81	68	Eltd1	EGF, latrophilin seven transmembrane domain containing 1	3	3 H3-H4	151375272	BM238996	170757	11050079, 11217851, 11438738, 12466851, 12477932, 14647991, 15203201	GO:0007165: signal transduction, GO:0007186: G-protein coupled receptor protein signaling pathway, GO:0007218: neuropeptide signaling pathway, GO:0005615: extracellular space, GO:0016020: membrane, GO:0016021: integral to membrane, GO:0004871: signal transducer activity, GO:0004872: receptor activity, GO:0004930: G-protein coupled receptor activity, GO:0005509: calcium ion binding		gb:BM238996 /DB_XREF=gi:17874266 /DB_XREF=K0527B01-3 /CLONE=K0527B01 /FEA=EST /CNT=4 /TID=Mm.218142.1 /TIER=ConsEnd /STK=2 /UG=Mm.218142 /UG_TITLE=ESTs
1448293_at	control	33.4679	17.0711	PPP-PPA	1856.77	74.9738	108.77	50.6223	1899.2	1770.2	1900.9	158.5	110.5	57.3	Ebf1	early B-cell factor 1	11	11 B1.1	44461556	BB125261	13591	7542362, 8012110, 8227050, 8491377, 8756438, 8876243, 9070927, 9105679, 9151732, 9389446, 9630743, 9858563, 10349636, 10435576, 10556054, 10704382, 10762365, 10842061, 10942392, 11042159, 11044609, 11060228, 11076752, 11076861, 11163266, 11217851, 11493561, 11498051, 11725301, 11869689, 11934853, 12062038, 12077253, 12118260, 12139918, 12391167, 12406913, 12411960, 12421703, 12466851, 12917357, 1…	GO:0006350: transcription, GO:0006355: regulation of transcription, DNA-dependent, GO:0007275: multicellular organismal development, GO:0045449: regulation of transcription, GO:0045941: positive regulation of transcription, GO:0005634: nucleus, GO:0003677: DNA binding, GO:0003700: transcription factor activity, GO:0005515: protein binding, GO:0005515: protein binding, GO:0008270: zinc ion binding…		gb:BB125261 /DB_XREF=gi:15408199 /DB_XREF=BB125261 /CLONE=9630004C21 /FEA=FLmRNA /CNT=236 /TID=Mm.4366.1 /TIER=Stack /STK=49 /UG=Mm.4366 /LL=13591 /UG_GENE=Ebf /UG_TITLE=early B-cell factor /FL=gb:NM_007897.1 gb:L12147.1
1453474_at	control	32.5763	9.1038	PPP-APA	1225.07	51.8021	134.57	26.0446	1173	1225.6	1276.6	120.9	118.2	164.6	1300007F04Rik	RIKEN cDNA 1300007F04 gene	11	11 B5	77331311	AI467583	67477	10349636, 11042159, 11076861, 11217851, 12466851, 16141072, 16141073	GO:0005615: extracellular space, GO:0016787: hydrolase activity		gb:AI467583 /DB_XREF=gi:4320920 /DB_XREF=ve38h09.x1 /CLONE=IMAGE:820481 /FEA=mRNA /CNT=24 /TID=Mm.45752.1 /TIER=ConsEnd /STK=2 /UG=Mm.45752 /LL=67477 /UG_GENE=1300007F04Rik /UG_TITLE=RIKEN cDNA 1300007F04 gene
1443983_at	control	32.2603	13.5597	PPP-PPP	2078.7	102.326	153.3	14.6857	2016.5	2022.8	2196.8	147.5	170	142.4	Sorbs1	sorbin and SH3 domain containing 1	19	19 C3	-40345351	BB218653	20411	8889548, 9238627, 9447983, 9461600, 9630982, 10085297, 10087302, 10349636, 10922068, 11001060, 11042159, 11076861, 11180952, 11217851, 11919667, 12466851, 12477932, 12693553, 15258163, 15782199, 15836771, 16141072, 16141073	GO:0006810: transport, GO:0008286: insulin receptor signaling pathway, GO:0015758: glucose transport, GO:0043149: stress fiber formation, GO:0048041: focal adhesion formation, GO:0001725: stress fiber, GO:0005634: nucleus, GO:0005634: nucleus, GO:0005913: cell-cell adherens junction, GO:0005924: cell-substrate adherens junction, GO:0016020: membrane, GO:0045121: lipid raft, GO:0005158: insulin re…	03320: PPAR signaling pathway, 04520: Adherens junction, 04910: Insulin signaling pathway	gb:BB218653 /DB_XREF=gi:8883606 /DB_XREF=BB218653 /CLONE=A530050L24 /FEA=EST /CNT=9 /TID=Mm.80699.1 /TIER=ConsEnd /STK=2 /UG=Mm.80699 /UG_TITLE=ESTs
1423439_at	control	31.758	235.538	PPP-APP	16966.6	918.58	72.03	72.1866	16654.6	16244.6	18000.5	23.6	155	37.5	Pck1	phosphoenolpyruvate carboxykinase 1, cytosolic	2	2 C1-qter	172796011	AW106963	18534	1316195, 1358284, 1460846, 1492743, 1916246, 1970329, 2505256, 2759422, 3865385, 6548474, 7490098, 7628695, 7719019, 7781998, 7905852, 7970291, 7988415, 8090784, 8500994, 8530045, 8985169, 9202079, 9257949, 9373037, 9405372, 9434955, 9457670, 9514916, 9518257, 9750160, 10049364, 10221772, 10224054, 10224131, 10349636, 10430081, 10441734, 10478489, 10501973, 10534402, 10544143, 10760573, 10866673,…	GO:0006094: gluconeogenesis, GO:0006629: lipid metabolic process, GO:0046327: glycerol biosynthetic process from pyruvate, GO:0000166: nucleotide binding, GO:0004611: phosphoenolpyruvate carboxykinase activity, GO:0004613: phosphoenolpyruvate carboxykinase (GTP) activity, GO:0005525: GTP binding, GO:0016301: kinase activity, GO:0016829: lyase activity, GO:0016831: carboxy-lyase activity	00020: Citrate cycle (TCA cycle), 00620: Pyruvate metabolism, 03320: PPAR signaling pathway, 04910: Insulin signaling pathway, 04920: Adipocytokine signaling pathway	gb:AW106963 /DB_XREF=gi:6077763 /DB_XREF=um34h07.x1 /CLONE=IMAGE:2236477 /FEA=FLmRNA /CNT=259 /TID=Mm.42246.1 /TIER=Stack /STK=25 /UG=Mm.42246 /LL=18534 /UG_GENE=Pck1 /UG_TITLE=phosphoenolpyruvate carboxykinase 1, cytosolic /FL=gb:NM_011044.1
1435043_at	control	30.6669	10.6462	PPP-PPP	1427.3	66.2401	134.07	30.7776	1402.8	1502.3	1376.8	158.5	144.2	99.5	Plcb1	phospholipase C, beta 1	2	2 F2-F3	134477970	BB794831	18795	2033248, 7642703, 7916325, 8617512, 8672127, 8687404, 8739298, 8889548, 9305844, 9753089, 10349636, 10609087, 11042159, 11076861, 11217851, 11224545, 11464583, 11471062, 12123715, 12364493, 12466851, 12477932, 12860966, 14621295, 15174099, 15474310, 15664177, 15749982, 15849202, 16141072, 16141073, 16210321, 16330775, 16339037, 16405873	GO:0006629: lipid metabolic process, GO:0007165: signal transduction, GO:0007242: intracellular signaling cascade, GO:0016042: lipid catabolic process, GO:0005737: cytoplasm, GO:0004435: phosphoinositide phospholipase C activity, GO:0004629: phospholipase C activity, GO:0004871: signal transducer activity, GO:0005509: calcium ion binding, GO:0016787: hydrolase activity	00562: Inositol phosphate metabolism, 04020: Calcium signaling pathway, 04070: Phosphatidylinositol signaling system, 04310: Wnt signaling pathway, 04540: Gap junction, 04720: Long-term potentiation, 04730: Long-term depression, 04912: GnRH signaling pathway, 04916: Melanogenesis	gb:BB794831 /DB_XREF=gi:16964450 /DB_XREF=BB794831 /CLONE=G431002B07 /FEA=EST /CNT=26 /TID=Mm.26557.1 /TIER=Stack /STK=21 /UG=Mm.26557 /LL=98861 /UG_GENE=AI132408 /UG_TITLE=expressed sequence AI132408
1436520_at	control	30.1365	9.3959	PPP-APA	700.93	22.9097	74.6	27.7663	692.8	683.2	726.8	101.8	75.7	46.3	AI450948	expressed sequence AI450948	12	12 F1	-113220001	BB378317	382643	10349636, 10922068, 11042159, 11076861, 11217851, 12466851, 16141072, 16141073	GO:0005515: protein binding		gb:BB378317 /DB_XREF=gi:16407712 /DB_XREF=BB378317 /CLONE=C130093J22 /FEA=EST /CNT=26 /TID=Mm.30517.1 /TIER=Stack /STK=8 /UG=Mm.30517 /LL=104825 /UG_GENE=AI450948 /UG_TITLE=expressed sequence AI450948
1460319_at	control	29.2393	1.9821	PPP-PPP	1128.7	30.853	569.43	12.0683	1097.6	1159.3	1129.2	555.5	576.6	576.2	Fut8	fucosyltransferase 8	12	12 C3	78157860	NM_016893	53618	10349636, 10902914, 11042159, 11070054, 11076861, 11217851, 11698403, 12466851, 12477932, 15782199, 16141072, 16141073, 16236725, 16316986, 16861703, 17043354	GO:0007179: transforming growth factor beta receptor signaling pathway, GO:0007585: respiratory gaseous exchange, GO:0043112: receptor metabolic process, GO:0005615: extracellular space, GO:0016020: membrane, GO:0016021: integral to membrane, GO:0008424: glycoprotein 6-alpha-L-fucosyltransferase activity, GO:0016740: transferase activity, GO:0016757: transferase activity, transferring glycosyl gr…	00510: N-Glycan biosynthesis, 00533: Keratan sulfate biosynthesis, 01030: Glycan structures - biosynthesis 1	gb:NM_016893.1 /DB_XREF=gi:8393370 /GEN=Fut8 /FEA=FLmRNA /CNT=333 /TID=Mm.35628.1 /TIER=FL+Stack /STK=14 /UG=Mm.35628 /LL=53618 /DEF=Mus musculus fucosyltransferase 8 (Fut8), mRNA. /PROD=fucosyltransferase 8 /FL=gb:BC010666.1 gb:AB025198.1 gb:NM_016893.1
1416978_at	control	28.5742	9.3735	PPP-PPP	3727.23	170.935	397.63	107.309	3616.5	3641.1	3924.1	508.6	389.9	294.4	Fcgrt	Fc receptor, IgG, alpha chain transporter	7	7 B3	-44961105	NM_010189	14132	7504013, 7538537, 7964511, 8605939, 9488722, 10081226, 10349636, 10657638, 10836253, 10922068, 10998088, 11042159, 11076861, 11090878, 11217851, 11717196, 12466851, 12477932, 12646614, 15124024, 15539420, 15627500, 15644205, 15782199, 16139891, 16141072, 16141073, 16183124, 16210471, 16284651, 16354907, 16415101, 16444258, 16841095	GO:0019882: antigen processing and presentation, GO:0005615: extracellular space, GO:0016020: membrane, GO:0016021: integral to membrane, GO:0042612: MHC class I protein complex, GO:0004872: receptor activity, GO:0019864: IgG binding		gb:NM_010189.1 /DB_XREF=gi:6753835 /GEN=Fcgrt /FEA=FLmRNA /CNT=178 /TID=Mm.3303.1 /TIER=FL+Stack /STK=61 /UG=Mm.3303 /LL=14132 /DEF=Mus musculus Fc receptor, IgG, alpha chain transporter (Fcgrt), mRNA. /PROD=Fc receptor, IgG, alpha chain transporter /FL=gb:L17022.1 gb:BC003786.1 gb:D37874.1 gb:NM_010189.1
1424408_at	control	28.4674	13.2909	PPP-AAA	1848.77	101.674	139.1	21.9725	1904.9	1910	1731.4	164.4	128.1	124.8	Lims2	LIM and senescent cell antigen like domains 2	18	18 B1	32074527	BC010816	225341	8889548, 10922068, 12477932, 12651156, 15618518, 16317048, 16452678	GO:0008150: biological_process, GO:0005925: focal adhesion, GO:0003674: molecular_function, GO:0008270: zinc ion binding, GO:0046872: metal ion binding		gb:BC010816.1 /DB_XREF=gi:14789888 /FEA=FLmRNA /CNT=55 /TID=Mm.24551.1 /TIER=FL+Stack /STK=34 /UG=Mm.24551 /DEF=Mus musculus, Similar to hypothetical protein FLJ10044, clone MGC:19129 IMAGE:4212305, mRNA, complete cds. /PROD=Similar to hypothetical protein FLJ10044 /FL=gb:BC010816.1
1439820_at	control	28.2982	10.2521	PPP-PPP	1116.8	47.4269	108.93	39.4482	1171.3	1094.2	1084.9	126.9	136.2	63.7	Ebf1	early B-cell factor 1	11	11 B1.1	44461556	BB364548	13591	7542362, 8012110, 8227050, 8491377, 8756438, 8876243, 9070927, 9105679, 9151732, 9389446, 9630743, 9858563, 10349636, 10435576, 10556054, 10704382, 10762365, 10842061, 10942392, 11042159, 11044609, 11060228, 11076752, 11076861, 11163266, 11217851, 11493561, 11498051, 11725301, 11869689, 11934853, 12062038, 12077253, 12118260, 12139918, 12391167, 12406913, 12411960, 12421703, 12466851, 12917357, 1…	GO:0006350: transcription, GO:0006355: regulation of transcription, DNA-dependent, GO:0007275: multicellular organismal development, GO:0045449: regulation of transcription, GO:0045941: positive regulation of transcription, GO:0005634: nucleus, GO:0003677: DNA binding, GO:0003700: transcription factor activity, GO:0005515: protein binding, GO:0005515: protein binding, GO:0008270: zinc ion binding…		gb:BB364548 /DB_XREF=gi:16406255 /DB_XREF=BB364548 /CLONE=C130022C07 /FEA=EST /CNT=9 /TID=Mm.167368.1 /TIER=ConsEnd /STK=6 /UG=Mm.167368 /UG_TITLE=ESTs
1440311_at	control	27.5993	20.6557	PPP-PPP	3939.03	229.415	190.7	51.9982	3854.6	4198.7	3763.8	250.3	167.2	154.6	Sorbs1	sorbin and SH3 domain containing 1	19	19 C3	-40345351	BB259710	20411	8889548, 9238627, 9447983, 9461600, 9630982, 10085297, 10087302, 10349636, 10922068, 11001060, 11042159, 11076861, 11180952, 11217851, 11919667, 12466851, 12477932, 12693553, 15258163, 15782199, 15836771, 16141072, 16141073	GO:0006810: transport, GO:0008286: insulin receptor signaling pathway, GO:0015758: glucose transport, GO:0043149: stress fiber formation, GO:0048041: focal adhesion formation, GO:0001725: stress fiber, GO:0005634: nucleus, GO:0005634: nucleus, GO:0005913: cell-cell adherens junction, GO:0005924: cell-substrate adherens junction, GO:0016020: membrane, GO:0045121: lipid raft, GO:0005158: insulin re…	03320: PPAR signaling pathway, 04520: Adherens junction, 04910: Insulin signaling pathway	gb:BB259710 /DB_XREF=gi:16399856 /DB_XREF=BB259710 /CLONE=A730091D05 /FEA=EST /CNT=7 /TID=Mm.69041.1 /TIER=ConsEnd /STK=5 /UG=Mm.69041 /UG_TITLE=ESTs
1435085_at	control	27.0487	2.9734	PPP-PPP	783.3	31.1795	263.43	11.6629	775.3	817.7	756.9	256.8	276.9	256.6	Crebl2	cAMP responsive element binding protein-like 2	6	6 G1	134795891	AV234069	232430	10349636, 11042159, 11076861, 11217851, 12466851, 12477932, 15782199, 16141072, 16141073	GO:0006355: regulation of transcription, DNA-dependent, GO:0005634: nucleus, GO:0003677: DNA binding		gb:AV234069 /DB_XREF=gi:15405067 /DB_XREF=AV234069 /CLONE=4632430C04 /FEA=EST /CNT=29 /TID=Mm.26478.1 /TIER=Stack /STK=20 /UG=Mm.26478 /LL=57903 /UG_GENE=AI046348 /UG_TITLE=EST AI046348
1416933_at	control	26.4243	4.3119	PPP-PPP	2768.4	74.9406	642.03	117.517	2714.1	2853.9	2737.2	777.6	579.4	569.1	Por	P450 (cytochrome) oxidoreductase	5	5 G2	135973840	NM_008898	18984	1420354, 2516426, 3917435, 6802825, 7476982, 7588219, 8011664, 8589531, 9052933, 10349636, 10633870, 10922068, 11013070, 11042159, 11076861, 11130978, 11217851, 11742006, 11779826, 12466851, 12477932, 12566435, 12697746, 12917333, 12929087, 15472464, 15717863, 15782199, 15805261, 15899812, 16006652, 16141072, 16141073, 16455785, 16488195, 16887103	GO:0006118: electron transport, GO:0005625: soluble fraction, GO:0005783: endoplasmic reticulum, GO:0005792: microsome, GO:0016020: membrane, GO:0016021: integral to membrane, GO:0003958: NADPH-hemoprotein reductase activity, GO:0005506: iron ion binding, GO:0009055: electron carrier activity, GO:0010181: FMN binding, GO:0016491: oxidoreductase activity		gb:NM_008898.1 /DB_XREF=gi:6679420 /GEN=Por /FEA=FLmRNA /CNT=179 /TID=Mm.3863.1 /TIER=FL+Stack /STK=63 /UG=Mm.3863 /LL=18984 /DEF=Mus musculus P450 (cytochrome) oxidoreductase (Por), mRNA. /PROD=P450 (cytochrome) oxidoreductase /FL=gb:D17571.1 gb:NM_008898.1
1417883_at	control	25.5328	6.5426	PPP-PPP	1507.63	83.9136	230.43	21.5663	1491.9	1432.7	1598.3	215.8	255.2	220.3	Gstt2	glutathione S-transferase, theta 2	10	10 B5-C1	-75275601	BC012707	14872	8617493, 8761485, 9653653, 9854036, 10349636, 10783391, 11018744, 11042159, 11076861, 11217851, 12038961, 12466851, 12477932, 16141072, 16141073	GO:0006749: glutathione metabolic process, GO:0005634: nucleus, GO:0004364: glutathione transferase activity, GO:0004364: glutathione transferase activity, GO:0016740: transferase activity	00480: Glutathione metabolism, 00980: Metabolism of xenobiotics by cytochrome P450	gb:BC012707.1 /DB_XREF=gi:15215221 /FEA=FLmRNA /CNT=73 /TID=Mm.24118.1 /TIER=FL+Stack /STK=34 /UG=Mm.24118 /LL=14872 /UG_GENE=Gstt2 /DEF=Mus musculus, glutathione S-transferase, theta 2, clone MGC:13991 IMAGE:3994154, mRNA, complete cds. /PROD=glutathione S-transferase, theta 2 /FL=gb:NM_010361.1 gb:BC012707.1 gb:U48420.1
1451972_at	control	25.5125	4.823	PPP-PAA	935.5	40.6634	193.97	29.68	910.1	914	982.4	227.2	184.6	170.1	Glcci1	glucocorticoid induced transcript 1	6	6 A1	8487815, 8209449	AA152997	170772	7758820, 8843413, 8889548, 10349636, 10922068, 11042159, 11076861, 11217851, 11591653, 12466851, 12477932, 12557054, 15031102, 15226823, 15511637, 16141072, 16141073	GO:0008150: biological_process, GO:0005737: cytoplasm, GO:0005515: protein binding		gb:AA152997 /DB_XREF=gi:1724645 /DB_XREF=mq48f01.r1 /CLONE=IMAGE:581977 /FEA=FLmRNA /CNT=216 /TID=Mm.27320.1 /TIER=Stack /STK=8 /UG=Mm.27320 /LL=170772 /UG_GENE=Gig18 /UG_TITLE=GIG18 /FL=gb:AF374476.1
1435436_at	control	25.1856	9.6448	PPP-PPP	13750.6	613.392	1425.7	584.962	13092.2	13853.8	14305.9	2091.6	994.7	1190.8	Epas1	endothelial PAS domain protein 1	17	17 E4	86662227	BI647951	13819	9000051, 9113979, 9178256, 9545558, 9576906, 9704006, 9808618, 10349636, 10395786, 10580084, 10813585, 10880563, 11042159, 11076861, 11172053, 11217851, 11304494, 11447259, 11782478, 11823643, 11839666, 12053176, 12464608, 12466851, 12477932, 12606578, 12750163, 12750401, 12832481, 14608355, 14691554, 15117738, 15190133, 15258146, 15369676, 15618518, 15626745, 15653678, 15689487, 15728559, 158515…	GO:0000160: two-component signal transduction system (phosphorelay), GO:0001525: angiogenesis, GO:0001666: response to hypoxia, GO:0001666: response to hypoxia, GO:0006350: transcription, GO:0006355: regulation of transcription, DNA-dependent, GO:0007165: signal transduction, GO:0007275: multicellular organismal development, GO:0030154: cell differentiation, GO:0045449: regulation of transcriptio…		gb:BI647951 /DB_XREF=gi:15562187 /DB_XREF=603276037F1 /CLONE=IMAGE:5316560 /FEA=EST /CNT=46 /TID=Mm.87705.1 /TIER=Stack /STK=16 /UG=Mm.87705 /UG_TITLE=ESTs
1436876_at	control	24.4834	15.2102	PPP-AAA	407.63	26.4685	26.8	5.0269	396.8	388.3	437.8	29.5	21	29.9	Rgs7bp	regulator of G-protein signalling 7 binding protein	13	13 D1	-106067536	AV337421	52882	8889548, 9371744, 10349636, 11042159, 11076861, 11217851, 12466851, 12477932, 15632198, 15897264, 16046666, 16141072, 16141073, 16574655			gb:AV337421 /DB_XREF=gi:16396460 /DB_XREF=AV337421 /CLONE=6430400M18 /FEA=EST /CNT=46 /TID=Mm.100348.1 /TIER=Stack /STK=40 /UG=Mm.100348 /LL=52882 /UG_GENE=D13Bwg1146e /UG_TITLE=DNA segment, Chr 13, Brigham & Womens Genetics 1146 expressed
1436043_at	control	23.9458	21.7839	PPP-PPP	7376.03	495.116	338.6	118.215	7749.4	6814.4	7564.3	326.5	462.4	226.9	Scn7a	sodium channel, voltage-gated, type VII, alpha	2	2 C1.3	-66476150	BB452990	20272	7590978, 7982916, 8250913, 8779936, 9726281, 10198179, 10349636, 11027237, 11042159, 11076861, 11217851, 11992118, 12213645, 12466851, 12650985, 15496663, 16141072, 16141073, 16223844	GO:0006811: ion transport, GO:0006812: cation transport, GO:0006814: sodium ion transport, GO:0006816: calcium ion transport, GO:0001518: voltage-gated sodium channel complex, GO:0016020: membrane, GO:0016021: integral to membrane, GO:0005216: ion channel activity, GO:0005248: voltage-gated sodium channel activity, GO:0005261: cation channel activity, GO:0005262: calcium channel activity		gb:BB508825 /DB_XREF=gi:9517790 /DB_XREF=BB508825 /CLONE=D730019N09 /FEA=EST /CNT=30 /TID=Mm.38127.1 /TIER=Stack /STK=11 /UG=Mm.38127 /LL=68745 /UG_GENE=1110034K09Rik /UG_TITLE=RIKEN cDNA 1110034K09 gene
1436453_at	control	23.8577	353.41	PPP-APA	11745	849.671	33.23	31.7418	10810.3	12470.6	11954.1	5.8	68	25.9	BB144871	expressed sequence BB144871	7			BB144871	101918				gb:BB144871 /DB_XREF=gi:8799808 /DB_XREF=BB144871 /CLONE=9930027H11 /FEA=EST /CNT=10 /TID=Mm.25766.1 /TIER=Stack /STK=9 /UG=Mm.25766 /LL=101918 /UG_GENE=BB144871 /UG_TITLE=expressed sequence BB144871
1454708_at	control	23.7822	5.9802	PPP-PPP	4116.57	26.8206	688.37	248.23	4099.8	4147.5	4102.4	973.7	569.3	522.1	Ablim1	actin-binding LIM protein 1	19	19 D2	-57090390	BG065289	226251	8889548, 9245787, 9417918, 9799617, 10349636, 10602987, 10922068, 11042159, 11076861, 11163266, 11217851, 12466851, 12477932, 12693553, 12849746, 15618518, 15647317, 16141072, 16141073	GO:0007010: cytoskeleton organization and biogenesis, GO:0007411: axon guidance, GO:0005856: cytoskeleton, GO:0015629: actin cytoskeleton, GO:0003779: actin binding, GO:0008270: zinc ion binding, GO:0046872: metal ion binding	04360: Axon guidance	gb:BG065289 /DB_XREF=gi:12547852 /DB_XREF=H3029D05-3 /CLONE=H3029D05 /FEA=EST /CNT=100 /TID=Mm.1947.1 /TIER=Stack /STK=65 /UG=Mm.1947 /LL=107346 /UG_GENE=AW060987 /UG_TITLE=expressed sequence AW060987
1449081_at	control	23.3701	66.8811	PPP-AAP	10009.9	716.63	149.67	143.107	10318.7	9190.6	10520.3	18.2	128.7	302.1	Ces3	carboxylesterase 3	8	8 C5	-96055199	NM_053200	104158	10349636, 10518925, 10725249, 10922068, 11042159, 11076861, 11217851, 11470237, 12466851, 12477932, 15188402, 15220344, 15269189, 15752068, 16141072, 16141073	GO:0006637: acyl-CoA metabolic process, GO:0009636: response to toxin, GO:0005615: extracellular space, GO:0005783: endoplasmic reticulum, GO:0003824: catalytic activity, GO:0004091: carboxylesterase activity, GO:0004759: serine esterase activity, GO:0016787: hydrolase activity, GO:0016789: carboxylic ester hydrolase activity	00960: Alkaloid biosynthesis II	gb:NM_053200.1 /DB_XREF=gi:16716504 /GEN=Ces3 /FEA=FLmRNA /CNT=81 /TID=Mm.120807.1 /TIER=FL+Stack /STK=23 /UG=Mm.120807 /LL=104158 /DEF=Mus musculus carboxylesterase 3 (Ces3), mRNA. /PROD=carboxylesterase 3 /FL=gb:NM_053200.1 gb:BC019198.1 gb:AF378751.1 gb:AB023631.1
1424155_at	control	22.9292	77.4088	PPP-PAA	7586.07	557.085	98	98.0082	6965.3	7750.4	8042.5	210.5	52.4	31.1	Fabp4	fatty acid binding protein 4, adipocyte	3	3 A1	-10186878	BC002148	11770	1617216, 1618860, 1794058, 2452440, 2506639, 3015943, 3036869, 3520554, 3968175, 6206497, 7906967, 8910278, 9371744, 9405372, 10224167, 10349636, 10512363, 10866041, 10965911, 10982846, 11042159, 11076861, 11217851, 11385507, 11481226, 11606480, 11827549, 11940593, 12377750, 12466851, 12477932, 12588883, 13129924, 15130516, 15155732, 15158467, 15175761, 15353487, 15367400, 15454399, 15684432, 157…	GO:0001816: cytokine production, GO:0006469: negative regulation of protein kinase activity, GO:0006810: transport, GO:0016481: negative regulation of transcription, GO:0042632: cholesterol homeostasis, GO:0050729: positive regulation of inflammatory response, GO:0005488: binding, GO:0008289: lipid binding, GO:0016564: transcriptional repressor activity	03320: PPAR signaling pathway	gb:BC002148.1 /DB_XREF=gi:12805356 /FEA=FLmRNA /CNT=59 /TID=Mm.582.2 /TIER=FL+Stack /STK=49 /UG=Mm.582 /LL=11770 /UG_GENE=Fabp4 /DEF=Mus musculus, clone MGC:7265 IMAGE:3484864, mRNA, complete cds. /PROD=Unknown (protein for MGC:7265) /FL=gb:BC002148.1
1451489_at	control	22.7746	3.4918	PPP-PPP	491.3	25.3923	140.7	8.1357	479	520.5	474.4	150	137.2	134.9	Slc25a35	solute carrier family 25, member 35	11	11 B3	68784325	BC019996	71998	10349636, 11042159, 11076861, 11217851, 12466851, 12477932, 15782199, 16141072, 16141073	GO:0006810: transport, GO:0006810: transport, GO:0005743: mitochondrial inner membrane, GO:0016020: membrane, GO:0016020: membrane, GO:0016021: integral to membrane, GO:0005215: transporter activity, GO:0005488: binding, GO:0005488: binding		gb:BC019996.1 /DB_XREF=gi:18044818 /FEA=FLmRNA /CNT=38 /TID=Mm.35781.1 /TIER=FL+Stack /STK=15 /UG=Mm.35781 /LL=71998 /UG_GENE=1810012H11Rik /DEF=Mus musculus, RIKEN cDNA 1810012H11 gene, clone MGC:28559 IMAGE:4207271, mRNA, complete cds. /PROD=RIKEN cDNA 1810012H11 gene /FL=gb:BC019996.1
1434674_at	control	22.6246	3.8472	PPP-PPP	1025.93	33.9117	266.67	47.209	1044.3	1046.7	986.8	304	213.6	282.4	Lyst	lysosomal trafficking regulator	13	13 A1	13382534	BB463428	17101	102659, 187062, 489978, 580786, 624833, 686157, 1113502, 1278263, 1434498, 1488056, 1516572, 1523694, 1548087, 1592442, 1632468, 1639480, 1672300, 1682216, 1818124, 1936982, 2307475, 2369371, 2513223, 2895730, 2985510, 3014003, 3033418, 3058198, 3297105, 3512758, 3584547, 3902123, 3910518, 4031470, 4039611, 4129802, 4589319, 4601767, 4634048, 4643821, 4697831, 5367369, 5590154, 6170520, 6218091, …	GO:0006810: transport, GO:0006968: cellular defense response, GO:0007165: signal transduction, GO:0008333: endosome to lysosome transport, GO:0015031: protein transport, GO:0043473: pigmentation, GO:0005768: endosome, GO:0015630: microtubule cytoskeleton		gb:BB463428 /DB_XREF=gi:16426891 /DB_XREF=BB463428 /CLONE=D130080H01 /FEA=EST /CNT=39 /TID=Mm.1423.3 /TIER=Stack /STK=27 /UG=Mm.1423 /LL=17101 /UG_GENE=Lyst /UG_TITLE=lysosomal trafficking regulator
1417185_at	control	22.3734	6.2949	PPP-PPP	10299.3	561.489	1636.13	366.767	10757.7	10467.1	9673	1834.6	1860.9	1212.9	Ly6a	lymphocyte antigen 6 complex, locus A	15	15 D3	-74822132	BC002070	110454	1315719, 1697928, 1709198, 2822573, 2895473, 3028776, 3957415, 7753800, 8187770, 9271586, 10349636, 10807778, 10922068, 11042159, 11076861, 11139227, 11217851, 11741941, 11751954, 11841445, 11969254, 12391229, 12393491, 12466851, 12477932, 12591281, 12611818, 12714519, 12732718, 14567980, 14702342, 15477599, 15546912, 15588510, 15857912, 15901485, 15930324, 15963860, 15964404, 16141072, 16141073,…	GO:0009897: external side of plasma membrane, GO:0016020: membrane, GO:0048503: GPI anchor binding		gb:BC002070.1 /DB_XREF=gi:12805220 /FEA=FLmRNA /CNT=158 /TID=Mm.8180.1 /TIER=FL+Stack /STK=53 /UG=Mm.8180 /LL=110454 /UG_GENE=Ly6a /DEF=Mus musculus, lymphocyte antigen 6 complex, clone MGC:6188 IMAGE:3486025, mRNA, complete cds. /PROD=lymphocyte antigen 6 complex /FL=gb:NM_010738.1 gb:M18184.1 gb:BC002070.1 gb:J03636.1
1419379_x_at	control	22.1372	28.2388	PPP-AAA	547.83	38.5858	19.4	14.8523	567.2	572.9	503.4	34.1	19.7	4.4	Fxyd2	FXYD domain-containing ion transport regulator 2	9	9 B	45154132, 45150212, 45157071	NM_052823	11936	8387529, 9396759, 9600999, 10349636, 10950925, 11042159, 11062458, 11076861, 11217851, 11526196, 12466851, 12477932, 15383396, 15572522, 15755730, 16141072, 16141073, 16403837, 16804105	GO:0006810: transport, GO:0006811: ion transport, GO:0006813: potassium ion transport, GO:0006814: sodium ion transport, GO:0016020: membrane, GO:0016021: integral to membrane, GO:0005216: ion channel activity, GO:0030955: potassium ion binding, GO:0031402: sodium ion binding		gb:NM_052823.1 /DB_XREF=gi:16554571 /GEN=Fxyd2 /FEA=FLmRNA /CNT=30 /TID=Mm.22742.1 /TIER=FL+Stack /STK=10 /UG=Mm.22742 /LL=11936 /DEF=Mus musculus FXYD domain-containing ion transport regulator 2 (Fxyd2), transcript variant b, mRNA. /PROD=FXYD domain-containing ion transport regulator2, isoform b /FL=gb:NM_052823.1
1451978_at	control	22.0759	13.7041	PPP-PPA	2231.93	81.5644	162.87	140.358	2312.6	2233.7	2149.5	312.1	143	33.5	Loxl1	lysyl oxidase-like 1	9	9 B	-58086738	AF357006	16949	8617512, 9119402, 9250877, 9585423, 10022501, 10349636, 11042159, 11076861, 11217851, 11486040, 11684696, 12466851, 12477932, 14745449, 15482472, 15609098, 16141072, 16141073, 16157454, 16251195, 16436666, 16707424	GO:0006464: protein modification, GO:0005576: extracellular region, GO:0005578: extracellular matrix (sensu Metazoa), GO:0004720: protein-lysine 6-oxidase activity, GO:0005507: copper ion binding, GO:0005515: protein binding, GO:0009055: electron carrier activity, GO:0016491: oxidoreductase activity, GO:0016641: oxidoreductase activity, acting on the CH-NH2 group of donors, oxygen as acceptor, GO…		gb:AF357006.1 /DB_XREF=gi:15420511 /GEN=Loxl1 /FEA=FLmRNA /CNT=93 /TID=Mm.21049.1 /TIER=FL+Stack /STK=43 /UG=Mm.21049 /LL=16949 /DEF=Mus musculus lysyl oxidase-like 1 (Loxl1) mRNA, complete cds. /PROD=lysyl oxidase-like 1 /FL=gb:AF357006.1
1456153_at	control	21.8177	2.7401	PPP-PPP	2163.37	83.5561	789.53	70.0971	2122.4	2108.2	2259.5	767.5	733.1	868	Ssh2	slingshot homolog 2 (Drosophila)	11	11 B5	77032619	BB038915	237860	10349636, 11042159, 11076861, 11217851, 12466851, 12477932, 14531860, 15368895, 16141072, 16141073	GO:0006470: protein amino acid dephosphorylation, GO:0030036: actin cytoskeleton organization and biogenesis, GO:0005856: cytoskeleton, GO:0003779: actin binding, GO:0004721: phosphoprotein phosphatase activity, GO:0004725: protein tyrosine phosphatase activity, GO:0008138: protein tyrosine/serine/threonine phosphatase activity, GO:0016787: hydrolase activity	04810: Regulation of actin cytoskeleton	gb:BB038915 /DB_XREF=gi:15403769 /DB_XREF=BB038915 /CLONE=6030410K16 /FEA=EST /CNT=27 /TID=Mm.44782.1 /TIER=Stack /STK=14 /UG=Mm.44782 /LL=104696 /UG_GENE=BB104748 /UG_TITLE=expressed sequence BB104748
1450883_a_at	control	21.7945	28.8988	PPP-PPP	26691.9	1952.14	923.63	618.756	26333.8	28798.3	24943.6	1339	1219.4	212.5	Cd36	CD36 antigen	5	5 A3	-17293839	BB534670	12491	7503937, 7685021, 8630729, 8950178, 9101712, 9371744, 9892232, 9990422, 10224152, 10349636, 10383407, 10384057, 10433968, 10480880, 10772649, 10913136, 11042159, 11076861, 11217851, 11716758, 11867619, 11937630, 11976335, 11988484, 12021254, 12088505, 12145296, 12150950, 12239221, 12356675, 12376530, 12466851, 12477932, 12479586, 12496189, 12606036, 12746501, 12796468, 12823473, 12923231, 1469911…	GO:0006810: transport, GO:0007155: cell adhesion, GO:0005764: lysosome, GO:0005886: plasma membrane, GO:0016020: membrane, GO:0016021: integral to membrane, GO:0004872: receptor activity, GO:0005515: protein binding	03320: PPAR signaling pathway, 04512: ECM-receptor interaction, 04640: Hematopoietic cell lineage, 04920: Adipocytokine signaling pathway	gb:BE307351 /DB_XREF=gi:9162326 /DB_XREF=601098766F1 /CLONE=IMAGE:3497416 /FEA=FLmRNA /CNT=240 /TID=Mm.18628.1 /TIER=Stack /STK=20 /UG=Mm.18628 /LL=12491 /UG_GENE=Cd36 /UG_TITLE=CD36 antigen /FL=gb:NM_007643.1 gb:L23108.1
1448136_at	control	21.708	65.5504	PPP-AAA	2949.77	225.72	45	52.5963	2706.2	2991.2	3151.9	105.4	20.3	9.3	Enpp2	ectonucleotide pyrophosphatase/phosphodiesterase 2	15	15 D2	-54668983	BC003264	18606	8889548, 9853961, 10349636, 10473125, 10702660, 10702665, 11042159, 11076861, 11217851, 12466851, 12477932, 12642576, 12834871, 15226265, 15371327, 15378605, 15700135, 15733672, 15782199, 15930494, 16141072, 16141073, 16219296, 16436050, 16782887, 16829511	GO:0008152: metabolic process, GO:0009117: nucleotide metabolic process, GO:0005615: extracellular space, GO:0005887: integral to plasma membrane, GO:0016020: membrane, GO:0016021: integral to membrane, GO:0003676: nucleic acid binding, GO:0003824: catalytic activity, GO:0004519: endonuclease activity, GO:0004528: phosphodiesterase I activity, GO:0004528: phosphodiesterase I activity, GO:0004551:…	00230: Purine metabolism, 00500: Starch and sucrose metabolism, 00740: Riboflavin metabolism, 00760: Nicotinate and nicotinamide metabolism, 00770: Pantothenate and CoA biosynthesis	gb:BC003264.1 /DB_XREF=gi:13096936 /FEA=FLmRNA /CNT=373 /TID=Mm.28107.1 /TIER=FL+Stack /STK=178 /UG=Mm.28107 /LL=18606 /UG_GENE=Enpp2 /DEF=Mus musculus, ectonucleotide pyrophosphatasephosphodiesterase 2, clone MGC:6665 IMAGE:3499038, mRNA, complete cds. /PROD=ectonucleotide pyrophosphatasephosphodiesterase2 /FL=gb:BC003264.1 gb:AF123542.1 gb:NM_015744.1
1431056_a_at	control	21.4893	30.1158	PPP-PPP	18597.5	1429.59	617.53	237.61	19268.9	19567.8	16955.8	866.5	592.9	393.2	Lpl	lipoprotein lipase	8	8 B3.3	71809542	AK017272	16956	1339460, 1748295, 1765386, 2002550, 2037298, 2474325, 2563260, 3597382, 7527452, 7542371, 7544347, 7595098, 7613763, 7671815, 7759497, 7803821, 7864096, 8009369, 8013374, 8075500, 8105016, 8135737, 8169531, 8417372, 8530024, 8662221, 8662686, 8668199, 8672138, 8675619, 8692976, 8761296, 8833245, 8833906, 9060410, 9150252, 9162744, 9183545, 9202040, 9294198, 9374130, 9405372, 9507200, 9643345, 965…	GO:0006629: lipid metabolic process, GO:0016042: lipid catabolic process, GO:0005615: extracellular space, GO:0016020: membrane, GO:0042627: chylomicron, GO:0003824: catalytic activity, GO:0004465: lipoprotein lipase activity, GO:0005319: lipid transporter activity, GO:0008201: heparin binding, GO:0016787: hydrolase activity, GO:0048503: GPI anchor binding	00561: Glycerolipid metabolism, 03320: PPAR signaling pathway, 05010: Alzheimer's disease	gb:AK017272.1 /DB_XREF=gi:12856426 /GEN=Lpl /FEA=mRNA /CNT=12 /TID=Mm.1514.2 /TIER=ConsEnd /STK=0 /UG=Mm.1514 /LL=16956 /UG_TITLE=lipoprotein lipase /DEF=Mus musculus 6 days neonate head cDNA, RIKEN full-length enriched library, clone:5430405H20:lipoprotein lipase, full insert sequence.
1416542_at	control	21.3691	1.7122	PPP-PPP	595	16.3083	347.5	11.6825	577.4	609.6	598	358.3	335.1	349.1	Phf1	PHD finger protein 1	17	17 A3.3	26660715	NM_009343	21652	1718647, 1731353, 9799836, 10341100, 10349636, 10725249, 10922068, 11042159, 11076861, 11217851, 11466526, 11559747, 12466851, 12477932, 15618518, 15782199, 16141072, 16141073	GO:0006355: regulation of transcription, DNA-dependent, GO:0005634: nucleus, GO:0003676: nucleic acid binding, GO:0005515: protein binding, GO:0005515: protein binding, GO:0008270: zinc ion binding, GO:0046872: metal ion binding		gb:NM_009343.1 /DB_XREF=gi:6678266 /GEN=Tctex3 /FEA=FLmRNA /CNT=118 /TID=Mm.18643.1 /TIER=FL+Stack /STK=83 /UG=Mm.18643 /LL=21652 /DEF=Mus musculus t-complex testis-expressed 3 (Tctex3), mRNA. /PROD=t-complex testis-expressed 3 /FL=gb:BC015077.1 gb:NM_009343.1 gb:AB011550.1 gb:U81490.1
1422047_at	control	20.4902	2.3435	PPP-PAA	115.3	2.3516	49.2	5.0685	117.6	112.9	115.4	54	49.7	43.9	Cdh5	cadherin 5	8	8 D3	106990827	NM_009868	12562	8555485, 8786117, 9177207, 9220534, 9655490, 9811942, 9864160, 10207135, 10349636, 10428027, 10499794, 10508865, 10688823, 10922068, 10981960, 11032855, 11042159, 11076861, 11217851, 11331305, 11439183, 11564885, 11950930, 12015303, 12234928, 12243749, 12466851, 12477932, 12697838, 12755332, 12771128, 12805065, 12810700, 12938162, 12975353, 14567980, 14627725, 14701881, 15107403, 15215174, 155417…	GO:0001955: blood vessel maturation, GO:0007155: cell adhesion, GO:0007156: homophilic cell adhesion, GO:0008285: negative regulation of cell proliferation, GO:0016337: cell-cell adhesion, GO:0005615: extracellular space, GO:0005911: intercellular junction, GO:0005923: tight junction, GO:0016020: membrane, GO:0016021: integral to membrane, GO:0005509: calcium ion binding, GO:0005515: protein bind…	04514: Cell adhesion molecules (CAMs), 04670: Leukocyte transendothelial migration	gb:NM_009868.1 /DB_XREF=gi:6753377 /GEN=Cdh5 /FEA=FLmRNA /CNT=15 /TID=Mm.21767.1 /TIER=FL /STK=1 /UG=Mm.21767 /LL=12562 /DEF=Mus musculus cadherin 5 (Cdh5), mRNA. /PROD=cadherin 5 /FL=gb:D63942.1 gb:NM_009868.1
1460061_at	control	20.4104	46	PPP-AAA	585.73	47.6483	12.73	9.6997	532.2	623.5	601.5	6.4	7.9	23.9	Adra1a	adrenergic receptor, alpha 1a	14	14 D1	65589367	AV342748	11549	7595531, 7692743, 9139936, 9590558, 9630362, 10349636, 11042159, 11076861, 11217851, 11306707, 11509451, 12093905, 12466851, 12471020, 12477932, 12595294, 12782680, 14519431, 15231500, 16141072, 16141073, 16171811, 16516910, 16585965, 17099296	GO:0001985: negative regulation of heart contraction rate in baroreceptor response to increased blood pressure, GO:0001994: norepinephrine-epinephrine vasoconstriction during regulation of blood pressure, GO:0001996: positive regulation of heart contraction rate by epinephrine-norepinephrine, GO:0001997: increased strength of heart contraction by epinephrine-norepinephrine, GO:0007165: signal tra…	04020: Calcium signaling pathway, 04080: Neuroactive ligand-receptor interaction	gb:AV342748 /DB_XREF=gi:16396985 /DB_XREF=AV342748 /CLONE=6430530M09 /FEA=EST /CNT=5 /TID=Mm.74137.1 /TIER=ConsEnd /STK=4 /UG=Mm.74137 /UG_TITLE=ESTs
1440397_at	control	20.1509	2.6864	PPP-PPP	152.77	6.5271	56.87	5.0342	148.8	160.3	149.2	61.1	58.2	51.3						BB464523					gb:BB464523 /DB_XREF=gi:16426998 /DB_XREF=BB464523 /CLONE=D130092I18 /FEA=EST /CNT=6 /TID=Mm.150477.1 /TIER=ConsEnd /STK=5 /UG=Mm.150477 /UG_TITLE=ESTs, Moderately similar to CIC2 RAT DIHYDROPYRIDINE-SENSITIVE L-TYPE, CALCIUM CHANNEL ALPHA-2DELTA SUBUNITS PRECURSOR (R.norvegicus)
1453103_at	control	19.9021	6.0414	PPP-PPP	1259.23	73.8759	208.43	53.902	1214.4	1218.8	1344.5	207.9	262.6	154.8	Ablim1	actin-binding LIM protein 1	19	19 D2	-57090390	AK011936	226251	8889548, 9245787, 9417918, 9799617, 10349636, 10602987, 10922068, 11042159, 11076861, 11163266, 11217851, 12466851, 12477932, 12693553, 12849746, 15618518, 15647317, 16141072, 16141073	GO:0007010: cytoskeleton organization and biogenesis, GO:0007411: axon guidance, GO:0005856: cytoskeleton, GO:0015629: actin cytoskeleton, GO:0003779: actin binding, GO:0008270: zinc ion binding, GO:0046872: metal ion binding	04360: Axon guidance	gb:AK011936.1 /DB_XREF=gi:12848366 /FEA=mRNA /CNT=86 /TID=Mm.203875.1 /TIER=Stack /STK=50 /UG=Mm.203875 /LL=72478 /UG_GENE=2610209L21Rik /UG_TITLE=RIKEN cDNA 2610209L21 gene /DEF=Mus musculus 10 days embryo whole body cDNA, RIKEN full-length enriched library, clone:2610209L21:unclassifiable transcript, full insert sequence.
1447322_at	control	19.8655	4.3061	PPP-PAA	103.63	3.7448	24.07	5.8398	106.8	99.5	104.6	21.8	19.7	30.7	Lims2	LIM and senescent cell antigen like domains 2	18	18 B1	32074527	AI845029	225341	8889548, 10922068, 12477932, 12651156, 15618518, 16317048, 16452678	GO:0008150: biological_process, GO:0005925: focal adhesion, GO:0003674: molecular_function, GO:0008270: zinc ion binding, GO:0046872: metal ion binding		gb:AI845029 /DB_XREF=gi:5488935 /DB_XREF=UI-M-BG0-ahy-a-02-0-UI.s1 /CLONE=UI-M-BG0-ahy-a-02-0-UI /FEA=EST /CNT=2 /TID=Mm.40155.1 /TIER=ConsEnd /STK=2 /UG=Mm.40155 /UG_TITLE=ESTs, Weakly similar to RNA binding motif protein, X chromosome (Mus musculus) (M.musculus)
1458179_at	control	19.8542	2.7843	PPP-PPP	501.17	19.6021	180	20.0192	520.6	481.4	501.5	157.2	194.7	188.1						BB526903					gb:BB526903 /DB_XREF=gi:16444396 /DB_XREF=BB526903 /CLONE=D930036N23 /FEA=EST /CNT=3 /TID=Mm.130940.1 /TIER=ConsEnd /STK=3 /UG=Mm.130940 /UG_TITLE=ESTs
1435386_at	control	19.7477	15.5958	PPP-PAA	987.73	75.4576	63.33	29.6615	1063.8	986.5	912.9	91.4	32.3	66.3	Vwf	Von Willebrand factor homolog	6	6 F3	125518581	BB667216	22371	1317267, 1936575, 7490564, 7502236, 7526952, 7681362, 7854452, 7896277, 7987303, 8179996, 8193357, 8318738, 8678996, 8782436, 8817457, 8889548, 8950511, 8986815, 9384381, 9686317, 9689083, 9689113, 10349636, 10359181, 10441735, 10552950, 10625534, 10688827, 10706142, 10926765, 10930441, 10976050, 10981960, 11015584, 11042159, 11071623, 11076861, 11154109, 11154224, 11159184, 11212329, 11217851, 1…	GO:0001889: liver development, GO:0001890: placenta development, GO:0007155: cell adhesion, GO:0007596: blood coagulation, GO:0007599: hemostasis, GO:0007599: hemostasis, GO:0030168: platelet activation, GO:0031589: cell-substrate adhesion, GO:0005578: extracellular matrix (sensu Metazoa), GO:0005615: extracellular space, GO:0002020: protease binding, GO:0002020: protease binding, GO:0005515: pro…	01430: Cell Communication, 04510: Focal adhesion, 04512: ECM-receptor interaction, 04610: Complement and coagulation cascades	gb:BB667216 /DB_XREF=gi:16398665 /DB_XREF=BB667216 /CLONE=6820430P06 /FEA=EST /CNT=28 /TID=Mm.22339.1 /TIER=Stack /STK=17 /UG=Mm.22339 /LL=101126 /UG_GENE=AI551257 /UG_TITLE=expressed sequence AI551257
1452730_at	control	19.6628	21.5298	PPP-AAA	494.47	31.8073	22.97	26.7081	529.5	467.4	486.5	53.8	7	8.1	1110033J19Rik	RIKEN cDNA 1110033J19 gene	6	6 G3	148311853	AK004068	66184	7671812, 8889548, 10349636, 11042159, 11076861, 11217851, 12466851, 12477932, 16141072, 16141073	GO:0006412: translation, GO:0005622: intracellular, GO:0005840: ribosome, GO:0003723: RNA binding, GO:0003735: structural constituent of ribosome, GO:0019843: rRNA binding		gb:AK004068.1 /DB_XREF=gi:12835100 /FEA=mRNA /CNT=98 /TID=Mm.3572.1 /TIER=Stack /STK=57 /UG=Mm.3572 /LL=66184 /UG_GENE=1110033J19Rik /UG_TITLE=RIKEN cDNA 1110033J19 gene /DEF=Mus musculus 18 days embryo whole body cDNA, RIKEN full-length enriched library, clone:1110033J19:homolog to RIBOSOMAL PROTEIN S4X, full insert sequence.
1417677_at	control	19.6561	3.0253	PPP-AAA	1031.63	29.7539	341	53.0874	1000.9	1060.3	1033.7	318.7	302.7	401.6	Opn3	opsin (encephalopsin)	1	1 H3	-177499102	NM_010098	13603	10234000, 10349636, 11042159, 11076861, 11217851, 12242008, 12466851, 12477932, 12573668, 14517541, 15664173, 16141072, 16141073, 16284245	GO:0007165: signal transduction, GO:0007186: G-protein coupled receptor protein signaling pathway, GO:0007601: visual perception, GO:0007602: phototransduction, GO:0007602: phototransduction, GO:0018298: protein-chromophore linkage, GO:0042752: regulation of circadian rhythm, GO:0050896: response to stimulus, GO:0016020: membrane, GO:0016021: integral to membrane, GO:0016021: integral to membrane…		gb:NM_010098.1 /DB_XREF=gi:6753709 /GEN=Opn3 /FEA=FLmRNA /CNT=44 /TID=Mm.32744.1 /TIER=FL+Stack /STK=39 /UG=Mm.32744 /LL=13603 /DEF=Mus musculus opsin (encephalopsin) (Opn3), mRNA. /PROD=encephalopsin /FL=gb:NM_010098.1 gb:AF140241.1
1448842_at	control	19.3901	31.3907	PPP-PPP	7664.57	654.941	244.17	102.017	7050.1	8353.6	7590	141.1	345.1	246.3	Cdo1	cysteine dioxygenase 1, cytosolic	18	18 C	-46838537	NM_033037	12583	8288233, 8827514, 8835096, 8889548, 9321482, 9417917, 10349636, 10922068, 10982846, 11042159, 11076861, 11110696, 11217851, 11602353, 12466851, 12477932, 16141072, 16141073, 16492780, 16829211, 16870172	GO:0019452: L-cysteine catabolic process to taurine, GO:0019530: taurine metabolic process, GO:0046439: L-cysteine metabolic process, GO:0005829: cytosol, GO:0005506: iron ion binding, GO:0009055: electron carrier activity, GO:0016491: oxidoreductase activity, GO:0016702: oxidoreductase activity, acting on single donors with incorporation of molecular oxygen, incorporation of two atoms of oxygen,…	00272: Cysteine metabolism, 00430: Taurine and hypotaurine metabolism	gb:NM_033037.1 /DB_XREF=gi:14719433 /GEN=Cdo1 /FEA=FLmRNA /CNT=310 /TID=Mm.29996.1 /TIER=FL+Stack /STK=36 /UG=Mm.29996 /LL=12583 /DEF=Mus musculus cysteine dioxygenase 1, cytosolic (Cdo1), mRNA. /PROD=cysteine dioxygenase 1, cytosolic /FL=gb:NM_033037.1 gb:BC013638.1
1416333_at	control	19.3673	2.7355	PPP-PAA	283.4	12.0826	103.6	10.6099	287.1	269.9	293.2	104.9	113.5	92.4	Dok2	docking protein 2	14	14 D2-D3	69509460	NM_010071	13449	9478921, 9697832, 9764820, 9799613, 10349636, 10428862, 11042159, 11076861, 11125038, 11217851, 11470823, 11739537, 12093790, 12466851, 12477932, 14647425, 15611294, 15611295, 15699069, 16141072, 16141073	GO:0000165: MAPKKK cascade, GO:0007169: transmembrane receptor protein tyrosine kinase signaling pathway, GO:0007265: Ras protein signal transduction, GO:0005575: cellular_component, GO:0005066: transmembrane receptor protein tyrosine kinase signaling protein activity, GO:0005069: transmembrane receptor protein tyrosine kinase docking protein activity, GO:0005158: insulin receptor binding, GO:001…		gb:NM_010071.1 /DB_XREF=gi:6753667 /GEN=Dok2 /FEA=FLmRNA /CNT=111 /TID=Mm.10761.1 /TIER=FL+Stack /STK=97 /UG=Mm.10761 /LL=13449 /DEF=Mus musculus downstream of tyrosine kinase 2 (Dok2), mRNA. /PROD=downstream of tyrosine kinase 2 /FL=gb:AF030627.1 gb:AF035117.1 gb:BC004590.1 gb:NM_010071.1 gb:AF059583.1
1455566_s_at	control	19.2802	2.5796	PPP-PPP	205.77	4.3936	79.77	10.4318	210.8	203.8	202.7	75.8	91.6	71.9	2810022L02Rik	RIKEN cDNA 2810022L02 gene	1	1 C2	57719473	AV337975	67198	8889548, 10349636, 11042159, 11076861, 11217851, 12466851, 12477932, 16141072, 16141073			gb:AV337975 /DB_XREF=gi:16396603 /DB_XREF=AV337975 /CLONE=6430407B13 /FEA=EST /CNT=13 /TID=Mm.220265.1 /TIER=Stack /STK=11 /UG=Mm.220265 /LL=98249 /UG_GENE=AA987173 /UG_TITLE=expressed sequence AA987173
1459301_at	control	19.2309	5.9678	PPP-AAA	166.7	10.1799	27.93	7.2507	156.1	167.6	176.4	31.4	32.8	19.6	Mrg1	myeloid ecotropic viral integration site-related gene 1	2	2 E4	-115554509	AW546127	17536	7649373, 8950991, 9049632, 9337137, 9337138, 10021349, 10349636, 10586884, 10654602, 10727869, 10842069, 11042159, 11044609, 11076861, 11101846, 11157778, 11217851, 11358480, 11412024, 11566859, 12117807, 12183364, 12193642, 12397630, 12441290, 12447396, 12466851, 12477932, 12571103, 12581525, 15030763, 15069081, 15465489, 15617687, 15618518, 15782199, 16141072, 16141073, 16672333, 16847320, 1691…	GO:0001654: eye development, GO:0006355: regulation of transcription, DNA-dependent, GO:0045449: regulation of transcription, GO:0005634: nucleus, GO:0003677: DNA binding, GO:0003700: transcription factor activity, GO:0043565: sequence-specific DNA binding		gb:AW546127 /DB_XREF=gi:7191534 /DB_XREF=L0004A02-3 /CLONE=L0004A02 /FEA=EST /CNT=2 /TID=Mm.182592.1 /TIER=ConsEnd /STK=2 /UG=Mm.182592 /UG_TITLE=ESTs
1448944_at	control	19.0919	7.6177	PPP-PPP	2075.57	131.304	272.47	97.5595	2170.9	2130	1925.8	316.9	339.9	160.6	Nrp1	neuropilin 1	8	8 E	131245329	AK011144	18186	8575331, 8748368, 9288753, 9331348, 9390514, 9742149, 9753685, 9811588, 10229225, 10328887, 10349636, 10409677, 10518505, 10675351, 10705382, 10707970, 10725340, 11025205, 11027230, 11042159, 11076861, 11084652, 11160433, 11165481, 11217851, 11231073, 11238106, 11442635, 11461151, 11688557, 11756651, 11786422, 11804779, 11830568, 11891274, 11906695, 11939589, 12036513, 12093729, 12118260, 1236197…	GO:0001525: angiogenesis, GO:0007155: cell adhesion, GO:0007275: multicellular organismal development, GO:0007399: nervous system development, GO:0007411: axon guidance, GO:0007507: heart development, GO:0016358: dendrite development, GO:0016477: cell migration, GO:0030154: cell differentiation, GO:0030517: negative regulation of axon extension, GO:0048010: vascular endothelial growth factor rece…	04360: Axon guidance	gb:AK011144.1 /DB_XREF=gi:12847078 /FEA=FLmRNA /CNT=224 /TID=Mm.27448.1 /TIER=Stack /STK=20 /UG=Mm.27448 /LL=18186 /UG_GENE=Nrp /UG_TITLE=neuropilin /DEF=Mus musculus 10 days embryo whole body cDNA, RIKEN full-length enriched library, clone:2600002F02:neuropilin, full insert sequence. /FL=gb:D50086.1 gb:NM_008737.1
1421733_a_at	control	18.9001	3.0535	PPP-PPP	1197.47	60.2603	392.17	42.6039	1129.6	1244.7	1218.1	435.1	391.5	349.9	Tpst1	protein-tyrosine sulfotransferase 1	5	5 F-G1	130358028	NM_013837	22021	9501187, 10349636, 10922068, 11042159, 11076861, 11217851, 11964405, 12466851, 12477932, 16141072, 16141073, 17046811	GO:0005615: extracellular space, GO:0016020: membrane, GO:0016021: integral to membrane, GO:0008476: protein-tyrosine sulfotransferase activity, GO:0016740: transferase activity		gb:NM_013837.1 /DB_XREF=gi:7305590 /GEN=Tpst1 /FEA=FLmRNA /CNT=2 /TID=Mm.16084.1 /TIER=FL /STK=2 /UG=Mm.16084 /LL=22021 /DEF=Mus musculus protein-tyrosine sulfotransferase 1 (Tpst1), mRNA. /PROD=protein-tyrosine sulfotransferase 1 /FL=gb:AF038008.1 gb:NM_013837.1
1424041_s_at	control	18.8727	20.9901	PPP-PPP	3592.1	297.976	171.13	98.903	3380.7	3462.7	3932.9	261.7	186.1	65.6	C1s	complement component 1, s subcomponent	6	6 F2	-124495963	BC022123	50908	10349636, 10700458, 10922068, 11042159, 11076861, 11217851, 12466851, 12477932, 12513694, 16141072, 16141073	GO:0006508: proteolysis, GO:0006508: proteolysis, GO:0006955: immune response, GO:0006956: complement activation, GO:0006958: complement activation, classical pathway, GO:0045087: innate immune response, GO:0005576: extracellular region, GO:0005615: extracellular space, GO:0003816: complement component C1s activity, GO:0004252: serine-type endopeptidase activity, GO:0004263: chymotrypsin activity…	04610: Complement and coagulation cascades	gb:BC022123.1 /DB_XREF=gi:18381003 /FEA=FLmRNA /CNT=113 /TID=Mm.24128.1 /TIER=FL+Stack /STK=59 /UG=Mm.24128 /DEF=Mus musculus, clone MGC:37773 IMAGE:5097206, mRNA, complete cds. /PROD=Unknown (protein for MGC:37773) /FL=gb:BC018319.1 gb:BC022123.1
1451660_a_at	control	18.8253	3.2674	PPP-AAA	208.13	4.3132	63.7	12.5694	212.9	204.5	207	61	77.4	52.7	Hoxb6	homeo box B6	11	11 D	96115260	BC016893	15414	1358459, 1358998, 1672751, 1683707, 1685115, 1935690, 1972280, 2463210, 2566383, 2571936, 2890503, 2891608, 2899893, 2906328, 3000607, 7828847, 7909996, 7954431, 8097172, 8097432, 8099712, 8104549, 8105001, 8625838, 8770553, 8786996, 8833235, 8887324, 9108390, 9367423, 9415485, 9501100, 9639506, 10349636, 11042159, 11076861, 11217851, 11290297, 11440720, 12183370, 12370779, 12466851, 12477932, 12…	GO:0006350: transcription, GO:0006355: regulation of transcription, DNA-dependent, GO:0007275: multicellular organismal development, GO:0007389: pattern specification process, GO:0009887: organ morphogenesis, GO:0045449: regulation of transcription, GO:0005634: nucleus, GO:0005667: transcription factor complex, GO:0003677: DNA binding, GO:0003700: transcription factor activity, GO:0043565: sequen…		gb:BC016893.1 /DB_XREF=gi:16877264 /FEA=FLmRNA /CNT=6 /TID=Mm.215.1 /TIER=FL /STK=3 /UG=Mm.215 /LL=15414 /UG_GENE=Hoxb6 /DEF=Mus musculus, clone MGC:18719 IMAGE:4223365, mRNA, complete cds. /PROD=Unknown (protein for MGC:18719) /FL=gb:BC016893.1
1451500_at	control	18.8052	4.5787	PPP-AAA	515.57	19.2542	112.6	31.7303	497.2	535.6	513.9	148.1	102.7	87	Ushbp1	Usher syndrome 1C binding protein 1	8	8 B3.3	-74314360	BC026453	234395	10349636, 11042159, 11076861, 11217851, 12466851, 12477932, 16141072, 16141073	GO:0008150: biological_process, GO:0005575: cellular_component, GO:0005515: protein binding, GO:0030165: PDZ domain binding		gb:BC026453.1 /DB_XREF=gi:20071419 /FEA=FLmRNA /CNT=26 /TID=Mm.34874.1 /TIER=FL+Stack /STK=14 /UG=Mm.34874 /DEF=Mus musculus, Similar to AIE-75 binding protein protein, clone MGC:31438 IMAGE:4460920, mRNA, complete cds. /PROD=Similar to AIE-75 binding protein protein /FL=gb:BC026453.1
1426978_at	control	18.7804	4.4264	PPP-PPP	2588.87	103.169	584.87	153.346	2489.8	2581.1	2695.7	730.6	599.1	424.9	Klhl2	kelch-like 2, Mayven (Drosophila)	8	8 B3.1	-67632054	AW682368	77113	8889548, 10349636, 10397770, 10725249, 10922068, 11042159, 11076861, 11217851, 12466851, 12477932, 12652657, 15782199, 16141072, 16141073	GO:0001725: stress fiber, GO:0005856: cytoskeleton, GO:0003779: actin binding, GO:0003779: actin binding, GO:0005515: protein binding, GO:0042803: protein homodimerization activity		gb:AW682368 /DB_XREF=gi:7557071 /DB_XREF=EST01177 /CLONE=e337 /FEA=mRNA /CNT=77 /TID=Mm.27412.1 /TIER=Stack /STK=30 /UG=Mm.27412 /LL=77113 /UG_GENE=Klhl2 /UG_TITLE=kelch-like 2, Mayven (Drosophila)
1424968_at	control	18.6894	3.189	PPP-PAA	190.07	8.0164	59.6	9.0515	199	183.5	187.7	70	55.3	53.5	2210023G05Rik	RIKEN cDNA 2210023G05 gene	8	8 D3	107850868	BC027185	72361	10349636, 11042159, 11076861, 11217851, 12466851, 12477932, 16141072, 16141073	GO:0003824: catalytic activity, GO:0004759: serine esterase activity, GO:0016787: hydrolase activity, GO:0016789: carboxylic ester hydrolase activity		gb:BC027185.1 /DB_XREF=gi:20072611 /FEA=FLmRNA /CNT=22 /TID=Mm.26580.1 /TIER=FL+Stack /STK=10 /UG=Mm.26580 /DEF=Mus musculus, clone MGC:28542 IMAGE:4194872, mRNA, complete cds. /PROD=Unknown (protein for MGC:28542) /FL=gb:BC027185.1
1417009_at	control	18.3129	8.7153	PPP-PAA	1430.47	91.4812	164.13	77.3059	1403.5	1355.5	1532.4	204.5	212.9	75	C1r	complement component 1, r subcomponent	6	6 F2	124478023	NM_023143	50909	10349636, 10700458, 10922068, 11042159, 11076861, 11217851, 11231310, 12466851, 12477932, 12513694, 16141072, 16141073	GO:0006508: proteolysis, GO:0006508: proteolysis, GO:0006955: immune response, GO:0006956: complement activation, GO:0006958: complement activation, classical pathway, GO:0045087: innate immune response, GO:0005576: extracellular region, GO:0005615: extracellular space, GO:0003815: complement component C1r activity, GO:0003816: complement component C1s activity, GO:0004252: serine-type endopeptid…	04610: Complement and coagulation cascades	gb:NM_023143.1 /DB_XREF=gi:12963528 /GEN=C1r /FEA=FLmRNA /CNT=148 /TID=Mm.24276.1 /TIER=FL+Stack /STK=60 /UG=Mm.24276 /LL=50909 /DEF=Mus musculus complement component 1, r subcomponent (C1r), mRNA. /PROD=complement component 1, r subcomponent /FL=gb:AF148216.1 gb:NM_023143.1 gb:BC004637.1
1421840_at	control	18.247	3.3804	PPP-PPP	12821.7	208.339	3792.9	831.326	12739.5	12667	13058.6	4417.4	4112	2849.3	Abca1	ATP-binding cassette, sub-family A (ABC1), member 1	4	4 A5-B3	-53051888	BB144704	11303	1282354, 7774911, 8088782, 8889548, 10349636, 10581369, 10655069, 10760292, 10799318, 10878804, 10922068, 10980140, 11004510, 11042159, 11076747, 11076861, 11217851, 11266384, 11352567, 11423537, 11457883, 11559713, 11560953, 11741998, 11752403, 11893753, 11896206, 11909955, 11972062, 12050168, 12093886, 12105210, 12151852, 12196520, 12215451, 12226704, 12384498, 12466851, 12487373, 12488094, 124…	GO:0006810: transport, GO:0006911: phagocytosis, engulfment, GO:0008203: cholesterol metabolic process, GO:0030301: cholesterol transport, GO:0042158: lipoprotein biosynthetic process, GO:0045332: phospholipid translocation, GO:0005794: Golgi apparatus, GO:0005887: integral to plasma membrane, GO:0016020: membrane, GO:0016021: integral to membrane, GO:0043231: intracellular membrane-bound organel…	02010: ABC transporters - General	gb:BB305534 /DB_XREF=gi:15411280 /DB_XREF=BB305534 /CLONE=B230120E19 /FEA=FLmRNA /CNT=126 /TID=Mm.369.1 /TIER=Stack /STK=28 /UG=Mm.369 /LL=11303 /UG_GENE=Abca1 /UG_TITLE=ATP-binding cassette, sub-family A (ABC1), member 1 /FL=gb:NM_013454.1
1459348_at	control	18.231	6.0771	PPP-PPP	556.87	42.9817	91.63	10.3055	539	605.9	525.7	82.9	103	89	Ebf1	early B-cell factor 1	11	11 B1.1	44461556	BB454472	13591	7542362, 8012110, 8227050, 8491377, 8756438, 8876243, 9070927, 9105679, 9151732, 9389446, 9630743, 9858563, 10349636, 10435576, 10556054, 10704382, 10762365, 10842061, 10942392, 11042159, 11044609, 11060228, 11076752, 11076861, 11163266, 11217851, 11493561, 11498051, 11725301, 11869689, 11934853, 12062038, 12077253, 12118260, 12139918, 12391167, 12406913, 12411960, 12421703, 12466851, 12917357, 1…	GO:0006350: transcription, GO:0006355: regulation of transcription, DNA-dependent, GO:0007275: multicellular organismal development, GO:0045449: regulation of transcription, GO:0045941: positive regulation of transcription, GO:0005634: nucleus, GO:0003677: DNA binding, GO:0003700: transcription factor activity, GO:0005515: protein binding, GO:0005515: protein binding, GO:0008270: zinc ion binding…		gb:BB454472 /DB_XREF=gi:16425867 /DB_XREF=BB454472 /CLONE=D130032J17 /FEA=EST /CNT=2 /TID=Mm.215971.1 /TIER=ConsEnd /STK=2 /UG=Mm.215971 /UG_TITLE=ESTs
1450724_at	control	18.2081	2.4849	PPP-PPP	1042.83	51.3145	419.67	29.6785	1006.3	1020.7	1101.5	426.4	445.4	387.2	Drctnnb1a	down-regulated by Ctnnb1, a	5		-23471007	NM_053090	84652	8889548, 10349636, 10910037, 10922068, 11042159, 11076861, 11217851, 12466851, 12477932, 16141072, 16141073, 16919269	GO:0008150: biological_process, GO:0005737: cytoplasm, GO:0003674: molecular_function		gb:NM_053090.1 /DB_XREF=gi:16716376 /GEN=Drctnnb1a-pending /FEA=FLmRNA /CNT=63 /TID=Mm.12393.1 /TIER=FL+Stack /STK=16 /UG=Mm.12393 /LL=84652 /DEF=Mus musculus down-regulated by Ctnnb1, a (Drctnnb1a-pending), mRNA. /PROD=down-regulated by Ctnnb1, a /FL=gb:AB030242.1 gb:NM_053090.1
1458597_at	control	18.0849	2.127	PPP-PPP	225.53	8.8636	106.03	7.2404	223.9	217.6	235.1	100.4	114.2	103.5						BE986250					gb:BE986250 /DB_XREF=gi:10660388 /DB_XREF=UI-M-CG0p-bgq-a-09-0-UI.s1 /CLONE=UI-M-CG0p-bgq-a-09-0-UI /FEA=EST /CNT=4 /TID=Mm.151710.1 /TIER=ConsEnd /STK=2 /UG=Mm.151710 /UG_TITLE=ESTs
1435748_at	control	18.0136	5.7984	PPP-PPP	3678.67	246.052	634.43	158.548	3398.8	3776.2	3861	662.3	777.2	463.8	Gda	guanine deaminase	19	19 B	-21458404	AW911807	14544	6375655, 8889548, 10075721, 10349636, 10725249, 10922068, 11042159, 11076861, 11217851, 11962625, 12466851, 12477932, 15368895, 16141072, 16141073	GO:0005615: extracellular space, GO:0008270: zinc ion binding, GO:0008892: guanine deaminase activity, GO:0016787: hydrolase activity	00230: Purine metabolism	gb:BE136057 /DB_XREF=gi:8598557 /DB_XREF=ug23h08.x1 /CLONE=IMAGE:1532511 /FEA=EST /CNT=61 /TID=Mm.157113.2 /TIER=Stack /STK=13 /UG=Mm.157113 /LL=107333 /UG_GENE=AW047581 /UG_TITLE=expressed sequence AW047581
1426539_at	control	18.0003	2.4883	PPP-PAA	248.33	7.7938	99.8	11.9804	241.9	257	246.1	97.1	112.9	89.4	Usp11	ubiquitin specific peptidase 11	X	X A1.3	19860890	AI117611	236733	8889548, 10349636, 11042159, 11076861, 11217851, 12084015, 12466851, 12477932, 15782199, 16141072, 16141073	GO:0006511: ubiquitin-dependent protein catabolic process, GO:0006512: ubiquitin cycle, GO:0005634: nucleus, GO:0004221: ubiquitin thiolesterase activity, GO:0008233: peptidase activity, GO:0008234: cysteine-type peptidase activity, GO:0016787: hydrolase activity		gb:AI117611 /DB_XREF=gi:3517935 /DB_XREF=ui48a04.x1 /CLONE=IMAGE:1885614 /FEA=FLmRNA /CNT=125 /TID=Mm.34489.1 /TIER=Stack /STK=25 /UG=Mm.34489 /UG_TITLE=Mus musculus, Similar to ubiquitin specific protease 11, clone MGC:6649 IMAGE:3496607, mRNA, complete cds /FL=gb:BC005470.1
1435749_at	control	17.8995	6.2283	PPP-PPP	3301.43	248.117	530.07	101.757	3181.8	3135.8	3586.7	613.5	560	416.7	Gda	guanine deaminase	19	19 B	-21458404	AW911807	14544	6375655, 8889548, 10075721, 10349636, 10725249, 10922068, 11042159, 11076861, 11217851, 11962625, 12466851, 12477932, 15368895, 16141072, 16141073	GO:0005615: extracellular space, GO:0008270: zinc ion binding, GO:0008892: guanine deaminase activity, GO:0016787: hydrolase activity	00230: Purine metabolism	gb:AW911807 /DB_XREF=gi:8077389 /DB_XREF=uf39b08.y1 /CLONE=IMAGE:1513719 /FEA=EST /CNT=61 /TID=Mm.157113.2 /TIER=Stack /STK=8 /UG=Mm.157113 /LL=107333 /UG_GENE=AW047581 /UG_TITLE=expressed sequence AW047581
1457664_x_at	control	17.8252	9.3201	PPP-AAA	643.4	36.1867	69.03	42.4891	660.8	667.6	601.8	83.5	102.4	21.2	C2	complement component 2 (within H-2S)	17	17 B1	-34470663	AV227574	12263	1394787, 1970336, 2229060, 2883115, 3034587, 3902621, 6088393, 6190740, 6735447, 6770000, 7641699, 8133044, 8138038, 8409391, 8624034, 8700167, 8824158, 9430715, 10229798, 10349636, 10686478, 11042159, 11076861, 11217851, 11261934, 11359841, 11739537, 12466851, 12477932, 14656967, 15782199, 16002707, 16141072, 16141073	GO:0006508: proteolysis, GO:0006955: immune response, GO:0006956: complement activation, GO:0006958: complement activation, classical pathway, GO:0045087: innate immune response, GO:0005576: extracellular region, GO:0005615: extracellular space, GO:0003813: classical-complement-pathway C3/C5 convertase activity, GO:0004252: serine-type endopeptidase activity, GO:0008233: peptidase activity, GO:00…	04610: Complement and coagulation cascades	gb:AV227574 /DB_XREF=gi:6179241 /DB_XREF=AV227574 /CLONE=4432406G08 /FEA=EST /CNT=4 /TID=Mm.56884.1 /TIER=ConsEnd /STK=4 /UG=Mm.56884 /UG_TITLE=ESTs
1443185_at	control	17.7576	3.7419	PPP-AAM	425.7	13.4815	113.77	27.2757	419.2	441.2	416.7	109.3	89	143	Lhfpl2	lipoma HMGIC fusion partner-like 2	13	13 D1	95158548	BB555180	218454	8889548, 10349636, 11042159, 11076861, 11125038, 11217851, 12466851, 12477932, 14621295, 15782199, 16141072, 16141073	GO:0008152: metabolic process, GO:0016020: membrane, GO:0016021: integral to membrane, GO:0016740: transferase activity		gb:BB555180 /DB_XREF=gi:16448522 /DB_XREF=BB555180 /CLONE=E330017K18 /FEA=EST /CNT=3 /TID=Mm.212881.1 /TIER=ConsEnd /STK=3 /UG=Mm.212881 /UG_TITLE=ESTs
1442618_at	control	17.5849	2.5428	PPP-AAA	301.23	6.9407	118.47	16.61	307.7	302.1	293.9	129.8	99.4	126.2	Ldhb	lactate dehydrogenase B	6	6 G2	-142447470	BB477709	16832	720506, 1914521, 2338075, 2401207, 4015615, 6375655, 7063884, 8833235, 9507200, 9813024, 10349636, 10922068, 11042159, 11044609, 11076861, 11217851, 11331305, 12466851, 12477932, 14522948, 15782199, 16141072, 16141073, 16582413	GO:0006096: glycolysis, GO:0006100: tricarboxylic acid cycle intermediate metabolic process, GO:0019642: anaerobic glycolysis, GO:0005737: cytoplasm, GO:0004459: L-lactate dehydrogenase activity, GO:0016491: oxidoreductase activity	00010: Glycolysis / Gluconeogenesis, 00272: Cysteine metabolism, 00620: Pyruvate metabolism, 00640: Propanoate metabolism	gb:BB477709 /DB_XREF=gi:16440347 /DB_XREF=BB477709 /CLONE=D330026F23 /FEA=EST /CNT=4 /TID=Mm.134720.1 /TIER=ConsEnd /STK=3 /UG=Mm.134720 /UG_TITLE=ESTs
1437604_x_at	control	17.5768	3.4017	PPP-PPP	1254.43	61.5537	368.77	61.872	1185.5	1273.9	1303.9	298.1	413.2	395	Apcdd1	adenomatosis polyposis coli down-regulated 1	18	18 E1	63047695	AU041258	494504	10349636, 10725249, 10922068, 11042159, 11076861, 11217851, 12466851, 12477932, 15465500, 15782199, 16141072, 16141073, 16782087, 16829211	GO:0016020: membrane, GO:0016021: integral to membrane		gb:AU041258 /DB_XREF=gi:3955493 /DB_XREF=AU041258 /CLONE=J0828E02 /FEA=EST /CNT=16 /TID=Mm.202327.1 /TIER=Stack /STK=16 /UG=Mm.202327 /LL=107001 /UG_GENE=AU041258 /UG_TITLE=expressed sequence AU041258
1452264_at	control	17.5018	11.3083	PPP-AAP	1511.17	134.384	133.63	22.9313	1356	1587.5	1590	149.2	107.3	144.4	Tenc1	tensin like C1 domain-containing phosphatase	15	15 F3	101931021	BI408679	209039	8889548, 10349636, 10922068, 11042159, 11076861, 11217851, 12466851, 12477932, 15782199, 16141072, 16141073, 16688531, 17006924	GO:0007242: intracellular signaling cascade, GO:0008150: biological_process, GO:0005575: cellular_component, GO:0005102: receptor binding, GO:0019901: protein kinase binding		gb:BI408679 /DB_XREF=gi:15169602 /DB_XREF=602964304F1 /CLONE=IMAGE:5119896 /FEA=mRNA /CNT=61 /TID=Mm.29389.1 /TIER=Stack /STK=30 /UG=Mm.29389 /UG_TITLE=Mus musculus, Similar to KIAA1075 protein, clone IMAGE:5099327, mRNA, partial cds
1434151_at	control	17.5002	19.444	PPP-PPP	3656.77	341.295	188.07	37.1242	3670.1	3309	3991.2	145.2	209.3	209.7	Mettl7a	methyltransferase like 7A	15	15 F3	100132850	AV171622	70152	10349636, 11042159, 11076861, 11217851, 12466851, 12477932, 16141072, 16141073	GO:0008168: methyltransferase activity, GO:0016740: transferase activity		gb:AV171622 /DB_XREF=gi:16383588 /DB_XREF=AV171622 /CLONE=3300001H21 /FEA=EST /CNT=117 /TID=Mm.220975.2 /TIER=Stack /STK=40 /UG=Mm.220975 /LL=70152 /UG_GENE=2210414H16Rik /UG_TITLE=RIKEN cDNA 2210414H16 gene
1444045_at	control	17.3941	11.095	PPP-AAA	700.83	61.3622	63.17	16.3262	648.8	768.5	685.2	47.4	80	62.1	A430107O13Rik	RIKEN cDNA A430107O13 gene	6	6 A3.1	21935910	BM218007	214642	10349636, 11042159, 11076861, 11217851, 12466851, 16141072, 16141073			gb:BM218007 /DB_XREF=gi:17777397 /DB_XREF=C0905B05-3 /CLONE=C0905B05 /FEA=EST /CNT=6 /TID=Mm.37399.1 /TIER=ConsEnd /STK=2 /UG=Mm.37399 /UG_TITLE=ESTs
1436737_a_at	control	17.3928	14.308	PPP-PPP	19462.7	1789.71	1360.27	216.115	21082.9	19763.5	17541.6	1297.2	1182.7	1600.9	Sorbs1	sorbin and SH3 domain containing 1	19	19 C3	-40345351	BB737680	20411	8889548, 9238627, 9447983, 9461600, 9630982, 10085297, 10087302, 10349636, 10922068, 11001060, 11042159, 11076861, 11180952, 11217851, 11919667, 12466851, 12477932, 12693553, 15258163, 15782199, 15836771, 16141072, 16141073	GO:0006810: transport, GO:0008286: insulin receptor signaling pathway, GO:0015758: glucose transport, GO:0043149: stress fiber formation, GO:0048041: focal adhesion formation, GO:0001725: stress fiber, GO:0005634: nucleus, GO:0005634: nucleus, GO:0005913: cell-cell adherens junction, GO:0005924: cell-substrate adherens junction, GO:0016020: membrane, GO:0045121: lipid raft, GO:0005158: insulin re…	03320: PPAR signaling pathway, 04520: Adherens junction, 04910: Insulin signaling pathway	gb:BB737680 /DB_XREF=gi:16136830 /DB_XREF=BB737680 /CLONE=F430014N09 /FEA=EST /CNT=83 /TID=Mm.29030.5 /TIER=Stack /STK=77 /UG=Mm.29030 /LL=20411 /UG_GENE=Sorbs1 /UG_TITLE=sorbin and SH3 domain containing 1
1455082_at	control	17.3421	2.7961	PPP-PAA	846.77	51.6182	302.83	16.9359	828.2	807	905.1	295.5	290.8	322.2	Cblb	Casitas B-lineage lymphoma b	16	16 B5	51950896	AW545867	208650	8889548, 10349636, 10646608, 10646609, 10922068, 11042159, 11070165, 11076861, 11217851, 11826757, 12415267, 12466851, 12477932, 12697763, 12771181, 12842890, 14738763, 14973438, 15240694, 15265912, 15308098, 15315962, 15467726, 15585834, 15589167, 15596523, 15661906, 16141072, 16141073, 16313364, 16424156, 16549761, 16713970, 16734387, 17045823, 17056522	GO:0006512: ubiquitin cycle, GO:0006955: immune response, GO:0007166: cell surface receptor linked signal transduction, GO:0007242: intracellular signaling cascade, GO:0042110: T cell activation, GO:0050860: negative regulation of T cell receptor signaling pathway, GO:0005634: nucleus, GO:0004871: signal transducer activity, GO:0005509: calcium ion binding, GO:0005515: protein binding, GO:0008270…	04630: Jak-STAT signaling pathway, 04660: T cell receptor signaling pathway, 04910: Insulin signaling pathway, 05220: Chronic myeloid leukemia	gb:AW545867 /DB_XREF=gi:7188284 /DB_XREF=C0199C09-3 /CLONE=C0199C09 /FEA=EST /CNT=28 /TID=Mm.37767.1 /TIER=Stack /STK=26 /UG=Mm.37767 /LL=106279 /UG_GENE=AI851073 /UG_TITLE=expressed sequence AI851073
1446619_at	control	17.3127	6.5296	PPP-AAA	283.17	20.1299	43.37	13.0516	263.7	303.9	281.9	51.2	50.6	28.3	1190002H23Rik	RIKEN cDNA 1190002H23 gene	14	14 D3	-78022905	BB157945	66214	8889548, 10349636, 11042159, 11076861, 11217851, 11687586, 12466851, 12477932, 16141072, 16141073	GO:0007049: cell cycle, GO:0005634: nucleus, GO:0005737: cytoplasm, GO:0005515: protein binding, GO:0030295: protein kinase activator activity		gb:BB157945 /DB_XREF=gi:16268408 /DB_XREF=BB157945 /CLONE=A130038J17 /FEA=EST /CNT=2 /TID=Mm.23610.1 /TIER=ConsEnd /STK=2 /UG=Mm.23610 /UG_TITLE=ESTs
1428471_at	control	17.2839	14.7923	PPP-PPP	19120.5	1777.25	1292.6	182.274	20373.6	19901.4	17086.5	1502.6	1175.4	1199.8	Sorbs1	sorbin and SH3 domain containing 1	19	19 C3	-40345351	BQ176684	20411	8889548, 9238627, 9447983, 9461600, 9630982, 10085297, 10087302, 10349636, 10922068, 11001060, 11042159, 11076861, 11180952, 11217851, 11919667, 12466851, 12477932, 12693553, 15258163, 15782199, 15836771, 16141072, 16141073	GO:0006810: transport, GO:0008286: insulin receptor signaling pathway, GO:0015758: glucose transport, GO:0043149: stress fiber formation, GO:0048041: focal adhesion formation, GO:0001725: stress fiber, GO:0005634: nucleus, GO:0005634: nucleus, GO:0005913: cell-cell adherens junction, GO:0005924: cell-substrate adherens junction, GO:0016020: membrane, GO:0045121: lipid raft, GO:0005158: insulin re…	03320: PPAR signaling pathway, 04520: Adherens junction, 04910: Insulin signaling pathway	gb:BQ176684 /DB_XREF=gi:20352176 /DB_XREF=UI-M-DJ2-bvz-k-18-0-UI.s1 /CLONE=UI-M-DJ2-bvz-k-18-0-UI /FEA=mRNA /CNT=72 /TID=Mm.30898.1 /TIER=Stack /STK=40 /UG=Mm.30898 /LL=75688 /UG_GENE=2310065E01Rik /UG_TITLE=RIKEN cDNA 2310065E01 gene
1451989_a_at	control	17.1129	7.1954	PPP-PPP	3247.07	206.376	451.27	193.604	3112.8	3143.7	3484.7	659.2	276.2	418.4	Mapre2	microtubule-associated protein, RP/EB family, member 2	18	18 A2	23946993	BC027056	212307	8858346, 8889548, 10349636, 11042159, 11076861, 11217851, 12466851, 12477932, 15782199, 15789376, 16141072, 16141073, 16148041	GO:0007049: cell cycle, GO:0007067: mitosis, GO:0051301: cell division, GO:0005874: microtubule, GO:0005515: protein binding, GO:0008017: microtubule binding		gb:BB311034 /DB_XREF=gi:16402667 /DB_XREF=BB311034 /CLONE=B230321B18 /FEA=FLmRNA /CNT=290 /TID=Mm.194045.1 /TIER=Stack /STK=161 /UG=Mm.194045 /UG_TITLE=Mus musculus, clone MGC:36474 IMAGE:5361238, mRNA, complete cds /FL=gb:BC025804.1 gb:BC027056.1
1450759_at	control	17.1086	10.9541	PPP-AAA	374.27	27.7954	34.17	20.3205	349.1	404.1	369.6	52.8	12.5	37.2	Bmp6	bone morphogenetic protein 6	13	13 A3.3	38353181	NM_007556	12161	1427904, 1460021, 1715687, 1893873, 1970330, 2481605, 2734307, 7515504, 7547504, 7589793, 7605753, 7789972, 7979162, 8050356, 8089189, 8211130, 8287471, 8808404, 8858176, 8889548, 9027500, 9056639, 9069123, 9152011, 9187146, 9321480, 9415424, 9486541, 9584130, 9603738, 9664685, 9808626, 9811942, 9832456, 9892740, 10072431, 10213384, 10349636, 10462412, 10495271, 10498273, 10687846, 10693795, 1069…	GO:0001503: ossification, GO:0001649: osteoblast differentiation, GO:0006954: inflammatory response, GO:0007275: multicellular organismal development, GO:0030154: cell differentiation, GO:0030509: BMP signaling pathway, GO:0040007: growth, GO:0045944: positive regulation of transcription from RNA polymerase II promoter, GO:0051216: cartilage development, GO:0005576: extracellular region, GO:00056…	04340: Hedgehog signaling pathway, 04350: TGF-beta signaling pathway	gb:NM_007556.1 /DB_XREF=gi:6680797 /GEN=Bmp6 /FEA=FLmRNA /CNT=41 /TID=Mm.214548.1 /TIER=FL+Stack /STK=11 /UG=Mm.214548 /LL=12161 /DEF=Mus musculus bone morphogenetic protein 6 (Bmp6), mRNA. /PROD=bone morphogenetic protein 6 /FL=gb:J04566.1 gb:NM_007556.1
1418788_at	control	17.095	7.4126	PPP-PPP	1134.87	72.7237	153.1	67.867	1054.7	1153.3	1196.6	178	205	76.3	Tek	endothelial-specific receptor tyrosine kinase	4	4 C5	94231317	NM_013690	21687	1282811, 1630810, 7477259, 7478529, 7507029, 7542761, 7589891, 7596435, 7596436, 7596437, 7647376, 7958865, 8034026, 8187650, 8217221, 8223275, 8386827, 8395828, 8415706, 8602241, 8661721, 8798151, 8846781, 8980224, 9096345, 9108247, 9356169, 9367982, 9461528, 9472016, 9683559, 9778514, 9846489, 10022836, 10027415, 10029583, 10207135, 10209122, 10323857, 10349636, 10395786, 10400661, 10428027, 10…	GO:0006468: protein amino acid phosphorylation, GO:0007160: cell-matrix adhesion, GO:0016337: cell-cell adhesion, GO:0030334: regulation of cell migration, GO:0045765: regulation of angiogenesis, GO:0005615: extracellular space, GO:0016020: membrane, GO:0016021: integral to membrane, GO:0000166: nucleotide binding, GO:0004672: protein kinase activity, GO:0004674: protein serine/threonine kinase a…		gb:NM_013690.1 /DB_XREF=gi:8567411 /GEN=Tek /FEA=FLmRNA /CNT=36 /TID=Mm.14313.1 /TIER=FL+Stack /STK=18 /UG=Mm.14313 /LL=21687 /DEF=Mus musculus endothelial-specific receptor tyrosine kinase (Tek), mRNA. /PROD=endothelial-specific receptor tyrosine kinase /FL=gb:NM_013690.1 gb:D13738.1
1426829_at	control	16.9757	1.3345	PPP-PPP	1550.77	23.2539	1162.03	32.131	1546.1	1530.2	1576	1170.9	1126.4	1188.8	Uimc1	ubiquitin interaction motif containing 1	13	13 B2	-55037501	U22015	20184	7760852, 10349636, 11042159, 11076861, 11125038, 11217851, 12080054, 12466851, 12477932, 16141072, 16141073	GO:0006350: transcription, GO:0006355: regulation of transcription, DNA-dependent, GO:0016481: negative regulation of transcription, GO:0005634: nucleus, GO:0004872: receptor activity		gb:U22015.1 /DB_XREF=gi:709960 /GEN=RIP110 /FEA=mRNA /CNT=94 /TID=Mm.4097.1 /TIER=Stack /STK=52 /UG=Mm.4097 /LL=20184 /DEF=Mus musculus retinoid X receptor interacting protein (RIP110) mRNA, partial cds. /PROD=retinoid X receptor interacting protein
1424186_at	control	16.9311	39.831	PPP-PPA	16179.3	1583.46	406.2	310.362	17272.1	16902.5	14363.4	564.6	605.4	48.6	Ccdc80	coiled-coil domain containing 80	16	16 B5	45013384	BG074158	67896	8889548, 10349636, 10922068, 11042159, 11076861, 11217851, 11812002, 12466851, 12477932, 15325258, 16141072, 16141073			gb:AB075019.1 /DB_XREF=gi:18958360 /GEN=urb /FEA=FLmRNA /CNT=132 /TID=Mm.181074.1 /TIER=FL+Stack /STK=46 /UG=Mm.181074 /LL=67896 /DEF=Mus musculus mRNA for URB, complete cds. /PROD=URB /FL=gb:AB075019.1
1437956_at	control	16.9262	4.3982	PPP-AAA	199.53	14.0008	45.37	7.27	214.9	187.5	196.2	43.1	53.5	39.5	BB220380	expressed sequence BB220380	11	11 B3	68319285	AV281292	104709	10349636, 11042159, 11076861, 11217851, 12466851, 12477932, 15611065, 15797027, 16141072, 16141073, 16476736			gb:AV281292 /DB_XREF=gi:16391519 /DB_XREF=AV281292 /CLONE=4933423M21 /FEA=EST /CNT=14 /TID=Mm.84980.1 /TIER=Stack /STK=13 /UG=Mm.84980 /LL=104709 /UG_GENE=BB220380 /UG_TITLE=expressed sequence BB220380
1418494_at	control	16.9072	14.0696	PPP-PPA	997.07	75.1645	70.87	57.9074	967.6	941.1	1082.5	101.1	107.4	4.1	Ebf2	early B-cell factor 2	14	14 D-E1	66187401	U71189	13592	9151732, 9186059, 9211912, 9322939, 9389446, 10349636, 10381577, 10704382, 11042159, 11076752, 11076861, 11180952, 11217851, 11498051, 11581159, 11944980, 12139918, 12466206, 12466851, 12477932, 12917357, 14993187, 15152034, 15229182, 15261831, 15618518, 15930111, 16141072, 16141073, 16326388, 16602821, 16774995, 16919269, 16964442, 17060461	GO:0006350: transcription, GO:0006355: regulation of transcription, DNA-dependent, GO:0007275: multicellular organismal development, GO:0045449: regulation of transcription, GO:0045941: positive regulation of transcription, GO:0005634: nucleus, GO:0003677: DNA binding, GO:0005515: protein binding, GO:0008270: zinc ion binding, GO:0030528: transcription regulator activity, GO:0046872: metal ion bi…		gb:NM_010095.1 /DB_XREF=gi:6753703 /GEN=Ebf2 /FEA=FLmRNA /CNT=35 /TID=Mm.179.1 /TIER=FL+Stack /STK=23 /UG=Mm.179 /LL=13592 /DEF=Mus musculus early B-cell factor 2 (Ebf2), mRNA. /PROD=early B-cell factor 2 /FL=gb:U92703.1 gb:U82441.1 gb:NM_010095.1 gb:U71189.1
1417625_s_at	control	16.4359	4.9956	PPP-PPP	3175.57	212.33	635.67	162.967	3071	3419.9	3035.8	822.7	560.1	524.2	Cxcr7	chemokine (C-X-C motif) receptor 7	1	1 D	92035173	BC015254	12778	9510554, 10349636, 10922068, 11042159, 11076861, 11217851, 12466851, 12477932, 12714971, 16141072, 16141073, 16919269	GO:0006935: chemotaxis, GO:0006952: defense response, GO:0007165: signal transduction, GO:0007186: G-protein coupled receptor protein signaling pathway, GO:0016020: membrane, GO:0016021: integral to membrane, GO:0001584: rhodopsin-like receptor activity, GO:0004871: signal transducer activity, GO:0004872: receptor activity, GO:0004930: G-protein coupled receptor activity, GO:0004950: chemokine re…		gb:BC015254.1 /DB_XREF=gi:15929639 /FEA=FLmRNA /CNT=72 /TID=Mm.6522.1 /TIER=FL+Stack /STK=40 /UG=Mm.6522 /LL=12778 /UG_GENE=Cmkor1 /DEF=Mus musculus, chemokine orphan receptor 1, clone MGC:18378 IMAGE:4242244, mRNA, complete cds. /PROD=chemokine orphan receptor 1 /FL=gb:BC015254.1 gb:NM_007722.1 gb:AF000236.1
1439852_at	control	16.4229	24.6077	PPP-AAA	491.33	47.6245	19.97	14.2581	541.4	446.6	486	25.9	30.3	3.7						BB036443					gb:BB036443 /DB_XREF=gi:16258373 /DB_XREF=BB036443 /CLONE=5930415N19 /FEA=EST /CNT=10 /TID=Mm.86920.1 /TIER=ConsEnd /STK=6 /UG=Mm.86920 /UG_TITLE=ESTs
1420838_at	control	16.3626	10.7655	PPP-AAA	2646.17	241.569	245.8	78.7733	2516.1	2924.9	2497.5	294.1	288.4	154.9	Ntrk2	neurotrophic tyrosine kinase, receptor, type 2	13	13 B1	58817455, 58816218	AK018789	18212	1327010, 1645620, 1751544, 2160854, 2171894, 2555172, 7582115, 7588071, 7746324, 7991545, 8114702, 8187631, 8223273, 8402890, 8530078, 8575307, 8662221, 8815902, 8889548, 8898237, 8918886, 8938453, 8955272, 8978665, 8994044, 9133385, 9141083, 9148911, 9184113, 9232598, 9263033, 9331334, 9364058, 9398452, 9421165, 9472042, 9640332, 9728914, 9728915, 9731539, 9736654, 9881298, 9973328, 10207144, 10…	GO:0001570: vasculogenesis, GO:0006468: protein amino acid phosphorylation, GO:0007169: transmembrane receptor protein tyrosine kinase signaling pathway, GO:0007275: multicellular organismal development, GO:0007399: nervous system development, GO:0007631: feeding behavior, GO:0014047: glutamate secretion, GO:0019222: regulation of metabolic process, GO:0030154: cell differentiation, GO:0042490: m…	04010: MAPK signaling pathway	gb:AK018789.1 /DB_XREF=gi:12858688 /GEN=Ntrk2 /FEA=FLmRNA /CNT=136 /TID=Mm.3993.1 /TIER=Stack /STK=107 /UG=Mm.3993 /LL=18212 /UG_TITLE=neurotrophic tyrosine kinase, receptor, type 2 /DEF=Mus musculus adult male cerebellum cDNA, RIKEN full-length enriched library, clone:1500040I13:neurotrophic tyrosine kinase, receptor, type 2, full insert sequence. /FL=gb:M33385.1 gb:NM_008745.1
1436358_at	control	16.3376	1.9405	PPP-PPP	746.33	4.5369	384.6	38.0803	750.5	747	741.5	352.1	375.2	426.5	Atpaf1	ATP synthase mitochondrial F1 complex assembly factor 1	4	4 D1	115282915	AV333459	230649	8889548, 10349636, 11042159, 11076861, 11217851, 12466851, 12477932, 15782199, 16141072, 16141073	GO:0006461: protein complex assembly, GO:0008150: biological_process, GO:0005575: cellular_component, GO:0005739: mitochondrion, GO:0003674: molecular_function, GO:0005515: protein binding		gb:AV333459 /DB_XREF=gi:15406395 /DB_XREF=AV333459 /CLONE=6330547J17 /FEA=EST /CNT=15 /TID=Mm.40639.1 /TIER=Stack /STK=9 /UG=Mm.40639 /LL=98399 /UG_GENE=AI593252 /UG_TITLE=expressed sequence AI593252
1418595_at	control	16.3073	84.1677	PPP-APA	20391	2137.37	242.27	107.322	22117.4	21055.3	18000.4	171	365.7	190.1	S3-12	plasma membrane associated protein, S3-12	17	17 D	-55693886	NM_020568	57435	9624692, 10349636, 11042159, 11076861, 11217851, 12466851, 12840023, 15111493, 15368895, 15731108, 16141072, 16141073	GO:0005886: plasma membrane		gb:NM_020568.1 /DB_XREF=gi:10181203 /GEN=S3-12-pending /FEA=FLmRNA /CNT=45 /TID=Mm.12966.1 /TIER=FL+Stack /STK=21 /UG=Mm.12966 /LL=57435 /DEF=Mus musculus plasma membrane associated protein, S3-12 (S3-12-pending), mRNA. /PROD=plasma membrane associated protein, S3-12 /FL=gb:AF064748.1 gb:NM_020568.1
1451263_a_at	control	16.2776	6.4478	PPP-PPP	20797	129.999	3225.43	1865.21	20647.9	20886.6	20856.5	4709.9	3834.6	1131.8	Fabp4	fatty acid binding protein 4, adipocyte	3	3 A1	-10186878	BC002148	11770	1617216, 1618860, 1794058, 2452440, 2506639, 3015943, 3036869, 3520554, 3968175, 6206497, 7906967, 8910278, 9371744, 9405372, 10224167, 10349636, 10512363, 10866041, 10965911, 10982846, 11042159, 11076861, 11217851, 11385507, 11481226, 11606480, 11827549, 11940593, 12377750, 12466851, 12477932, 12588883, 13129924, 15130516, 15155732, 15158467, 15175761, 15353487, 15367400, 15454399, 15684432, 157…	GO:0001816: cytokine production, GO:0006469: negative regulation of protein kinase activity, GO:0006810: transport, GO:0016481: negative regulation of transcription, GO:0042632: cholesterol homeostasis, GO:0050729: positive regulation of inflammatory response, GO:0005488: binding, GO:0008289: lipid binding, GO:0016564: transcriptional repressor activity	03320: PPAR signaling pathway	gb:BC002148.1 /DB_XREF=gi:12805356 /FEA=FLmRNA /CNT=59 /TID=Mm.582.2 /TIER=FL+Stack /STK=49 /UG=Mm.582 /LL=11770 /UG_GENE=Fabp4 /DEF=Mus musculus, clone MGC:7265 IMAGE:3484864, mRNA, complete cds. /PROD=Unknown (protein for MGC:7265) /FL=gb:BC002148.1
1456825_at	control	16.2644	1.9875	PPP-PAP	386.97	11.1733	194.7	17.1578	381.7	379.4	399.8	185.4	214.5	184.2	Wdr33	WD repeat domain 33	18	18 B3	31970294	BB482118	74320	8889548, 10349636, 10922068, 11042159, 11076861, 11162572, 11217851, 12466851, 12477932, 16141072, 16141073	GO:0005634: nucleus		gb:BB482118 /DB_XREF=gi:16440889 /DB_XREF=BB482118 /CLONE=D430008B02 /FEA=EST /CNT=7 /TID=Mm.26524.1 /TIER=ConsEnd /STK=7 /UG=Mm.26524 /UG_TITLE=ESTs
1454728_s_at	control	16.2461	3.5017	PPP-PPP	717.97	27.8283	205.03	47.0755	705.1	749.9	698.9	250	209	156.1	Atp8a1	ATPase, aminophospholipid transporter (APLT), class I, type 8A, member 1	5	5 C3.1	-67897277	AW610650	11980	8889548, 9548971, 10349636, 10801890, 10873389, 10922068, 11042159, 11076861, 11217851, 12466851, 12477932, 14975727, 15782199, 15919184, 16141072, 16141073, 16618126, 16643453, 17239457	GO:0006810: transport, GO:0006812: cation transport, GO:0008152: metabolic process, GO:0016020: membrane, GO:0016021: integral to membrane, GO:0000166: nucleotide binding, GO:0000287: magnesium ion binding, GO:0003824: catalytic activity, GO:0004012: phospholipid-translocating ATPase activity, GO:0005524: ATP binding, GO:0015662: ATPase activity, coupled to transmembrane movement of ions, phospho…		gb:AW610650 /DB_XREF=gi:7315466 /DB_XREF=up35d10.x1 /CLONE=IMAGE:2698963 /FEA=EST /CNT=69 /TID=Mm.200366.1 /TIER=Stack /STK=58 /UG=Mm.200366 /LL=100684 /UG_GENE=AI481521 /UG_TITLE=expressed sequence AI481521
1458345_s_at	control	16.1724	10.5358	PPP-PAP	309.4	29.0661	29.37	7.3921	342.4	287.6	298.2	31.3	21.2	35.6	Colec11	collectin sub-family member 11	12	12 B1	-29180440	BB239199	71693	10349636, 11042159, 11076861, 11217851, 12466851, 12477932, 16141072, 16141073	GO:0006817: phosphate transport, GO:0005615: extracellular space, GO:0005737: cytoplasm, GO:0005529: sugar binding		gb:BB239199 /DB_XREF=gi:8921680 /DB_XREF=BB239199 /CLONE=A630076B06 /FEA=EST /CNT=3 /TID=Mm.113259.1 /TIER=ConsEnd /STK=3 /UG=Mm.113259 /UG_TITLE=ESTs
1435370_a_at	control	16.1181	51.9429	PPP-PPP	13378.8	1386.86	257.57	254.424	13940.3	11799.2	14396.8	40.4	194.8	537.5	Ces3	carboxylesterase 3	8	8 C5	-96055199	AI315015	104158	10349636, 10518925, 10725249, 10922068, 11042159, 11076861, 11217851, 11470237, 12466851, 12477932, 15188402, 15220344, 15269189, 15752068, 16141072, 16141073	GO:0006637: acyl-CoA metabolic process, GO:0009636: response to toxin, GO:0005615: extracellular space, GO:0005783: endoplasmic reticulum, GO:0003824: catalytic activity, GO:0004091: carboxylesterase activity, GO:0004759: serine esterase activity, GO:0016787: hydrolase activity, GO:0016789: carboxylic ester hydrolase activity	00960: Alkaloid biosynthesis II	gb:AI315015 /DB_XREF=gi:4030282 /DB_XREF=uj23d06.x1 /CLONE=IMAGE:1920779 /FEA=EST /CNT=21 /TID=Mm.120807.2 /TIER=Stack /STK=17 /UG=Mm.120807 /LL=104158 /UG_GENE=Ces3 /UG_TITLE=carboxylesterase 3
1439925_at	control	16.0992	5.8247	PPP-AAA	435.3	33.9616	74.73	18.7463	473	407.1	425.8	86.2	84.9	53.1	Tm4sf1	transmembrane 4 superfamily member 1	3	3 D	-57374992	BQ031166	17112	7510285, 7548016, 8654959, 8889548, 10349636, 10725249, 11042159, 11076861, 11217851, 11267677, 12466851, 12477932, 12855661, 16141072, 16141073	GO:0016020: membrane, GO:0016021: integral to membrane		gb:BQ031166 /DB_XREF=gi:19766445 /DB_XREF=UI-1-CF0-amb-e-08-0-UI.s1 /CLONE=UI-1-CF0-amb-e-08-0-UI /FEA=EST /CNT=7 /TID=Mm.44024.1 /TIER=ConsEnd /STK=6 /UG=Mm.44024 /UG_TITLE=ESTs
1457319_at	control	16.0224	22.2991	AAP-AAA	159.07	16.1661	7.13	2.9006	159.9	174.8	142.5	4.2	7.2	10	1190002H23Rik	RIKEN cDNA 1190002H23 gene	14	14 D3	-78022905	BB216233	66214	8889548, 10349636, 11042159, 11076861, 11217851, 11687586, 12466851, 12477932, 16141072, 16141073	GO:0007049: cell cycle, GO:0005634: nucleus, GO:0005737: cytoplasm, GO:0005515: protein binding, GO:0030295: protein kinase activator activity		gb:BB216233 /DB_XREF=gi:16353092 /DB_XREF=BB216233 /CLONE=A530031G08 /FEA=EST /CNT=7 /TID=Mm.131247.1 /TIER=ConsEnd /STK=4 /UG=Mm.131247 /UG_TITLE=ESTs
1433694_at	control	16.0215	45.7615	PPP-PPP	11377.8	1197.26	248.63	118.92	11396.6	12565.6	10171.3	277.3	350.6	118	Pde3b	phosphodiesterase 3B, cGMP-inhibited	7	7 F1	114206434	AV270888	18576	8889548, 8921398, 10349636, 10454575, 10873386, 11042159, 11076861, 11217851, 12213348, 12466851, 12729899, 14736883, 15294162, 15582152, 16141072, 16141073, 16476736, 16503395, 16516160, 16702214, 17143332	GO:0007165: signal transduction, GO:0031018: endocrine pancreas development, GO:0042593: glucose homeostasis, GO:0050796: regulation of insulin secretion, GO:0016020: membrane, GO:0016021: integral to membrane, GO:0003824: catalytic activity, GO:0004114: 3',5'-cyclic-nucleotide phosphodiesterase activity, GO:0016787: hydrolase activity	00230: Purine metabolism, 04910: Insulin signaling pathway	gb:AV270888 /DB_XREF=gi:16389927 /DB_XREF=AV270888 /CLONE=4931402H15 /FEA=EST /CNT=86 /TID=Mm.39980.1 /TIER=Stack /STK=71 /UG=Mm.39980 /LL=101669 /UG_GENE=AI847709 /UG_TITLE=expressed sequence AI847709
1417765_a_at	control	15.968	74.8161	PPP-PPP	7838.23	838.474	104.77	25.0292	7055.8	7735.6	8723.3	78.4	128.2	107.7	Amy1	amylase 1, salivary	3	3 F3	-113547957	NM_007446	11722	93520, 94264, 284003, 489953, 1021597, 1141004, 1348427, 1360278, 1401878, 1617215, 1794058, 2002257, 2040456, 2328996, 2332419, 2338144, 2410924, 2431276, 2450406, 2451911, 2476716, 2565740, 2571572, 2824476, 2842249, 2897103, 2902233, 2903254, 3038891, 3872721, 4745489, 6157477, 6160178, 6160849, 6161122, 6162108, 6162570, 6163812, 6166922, 6176569, 6176715, 6200103, 6207174, 6375655, 6529441, …	GO:0005975: carbohydrate metabolic process, GO:0008152: metabolic process, GO:0005615: extracellular space, GO:0003824: catalytic activity, GO:0004556: alpha-amylase activity, GO:0005509: calcium ion binding, GO:0016787: hydrolase activity, GO:0016798: hydrolase activity, acting on glycosyl bonds, GO:0031404: chloride ion binding, GO:0043169: cation binding, GO:0046872: metal ion binding	00500: Starch and sucrose metabolism	gb:NM_007446.1 /DB_XREF=gi:6996908 /GEN=Amy1 /FEA=FLmRNA /CNT=179 /TID=Mm.33941.1 /TIER=FL+Stack /STK=36 /UG=Mm.33941 /LL=11722 /DEF=Mus musculus amylase 1, salivary (Amy1), mRNA. /PROD=amylase 1, salivary /FL=gb:NM_007446.1 gb:BC009121.1
1419300_at	control	15.9537	5.5577	PPP-PAA	776.03	46.765	139.63	50.8602	722.8	810.5	794.8	193.2	92	133.7	Flt1	FMS-like tyrosine kinase 1	5	5 G	-147872544	NM_010228	14254	1312256, 1592003, 1711190, 7490564, 7596435, 7596436, 7618085, 7647376, 7683699, 8090202, 8134130, 8248162, 8380915, 8393164, 8573716, 8602241, 8614412, 8672130, 8875071, 8889548, 9027485, 9113979, 9285590, 9295307, 9524283, 9689083, 9778514, 9799236, 9806910, 9811459, 9828156, 9861052, 10022836, 10027415, 10194760, 10207135, 10229225, 10340753, 10349636, 10357944, 10395786, 10428027, 10545106, 1…	GO:0001525: angiogenesis, GO:0001569: patterning of blood vessels, GO:0006468: protein amino acid phosphorylation, GO:0007155: cell adhesion, GO:0007169: transmembrane receptor protein tyrosine kinase signaling pathway, GO:0007275: multicellular organismal development, GO:0016477: cell migration, GO:0030154: cell differentiation, GO:0030947: regulation of vascular endothelial growth factor recept…	04060: Cytokine-cytokine receptor interaction, 04510: Focal adhesion	gb:NM_010228.1 /DB_XREF=gi:6753885 /GEN=Flt1 /FEA=FLmRNA /CNT=44 /TID=Mm.3464.1 /TIER=FL+Stack /STK=11 /UG=Mm.3464 /LL=14254 /DEF=Mus musculus FMS-like tyrosine kinase 1 (Flt1), mRNA. /PROD=FMS-like tyrosine kinase 1 /FL=gb:NM_010228.1 gb:D88689.1 gb:L07297.1
1435796_at	control	15.9142	29.9042	PPP-AAA	353.87	37.0009	11.83	4.0857	329.1	336.1	396.4	8.9	10.1	16.5	C530024P05Rik	RIKEN cDNA C530024P05 gene	5	5 F	113731054	AV280210	320916	10349636, 11042159, 11076861, 11217851, 12466851, 15368895, 16141072, 16141073			gb:AV280210 /DB_XREF=gi:15405712 /DB_XREF=AV280210 /CLONE=4933413A10 /FEA=EST /CNT=18 /TID=Mm.102783.1 /TIER=Stack /STK=13 /UG=Mm.102783 /UG_TITLE=ESTs
1420131_s_at	control	15.875	1.6946	PPP-PPP	4833.23	215.664	2852.17	14.4105	4775.8	4652.1	5071.8	2859.1	2835.6	2861.8	Pttg1ip	pituitary tumor-transforming 1 interacting protein	10	10 C1	77025481	AU018448	108705	10349636, 10725249, 10922068, 11042159, 11076861, 11217851, 12466851, 12466854, 12466855, 12477932, 15782199, 16141072, 16141073	GO:0006606: protein import into nucleus, GO:0007275: multicellular organismal development, GO:0005634: nucleus, GO:0005737: cytoplasm, GO:0016020: membrane, GO:0016021: integral to membrane		gb:AU018448 /DB_XREF=gi:3373938 /DB_XREF=AU018448 /CLONE=J0503G02 /FEA=EST /CNT=1 /TID=Mm.199914.1 /TIER=ConsEnd /STK=1 /UG=Mm.199914 /LL=103342 /UG_GENE=AU018448 /UG_TITLE=expressed sequence AU018448
1434723_at	control	15.872	2.7476	PPP-PPA	289.97	8.5448	105.53	18.2226	280.1	294.9	294.9	120.1	111.4	85.1	Traf3ip2	Traf3 interacting protein 2	10	10 B1	39302349	BF472685	103213	10349636, 11042159, 11076861, 11217851, 12459498, 12466851, 12477932, 15485634, 16141072, 16141073	GO:0001783: B cell apoptosis, GO:0006959: humoral immune response, GO:0048305: immunoglobulin secretion, GO:0005515: protein binding		gb:BF472685 /DB_XREF=gi:11541868 /DB_XREF=UI-M-BZ0-axn-f-09-0-UI.r1 /CLONE=UI-M-BZ0-axn-f-09-0-UI /FEA=EST /CNT=40 /TID=Mm.29770.1 /TIER=Stack /STK=26 /UG=Mm.29770 /LL=103206 /UG_GENE=AI426748 /UG_TITLE=expressed sequence AI426748
1442175_at	control	15.8673	5.1605	PPP-PAA	337.67	6.7308	65.43	28.9443	329.9	341.8	341.3	96.3	61.1	38.9	C030027H14Rik	RIKEN cDNA C030027H14 gene	10			BB358264	77465	8889548, 10349636, 11042159, 11076861, 11217851, 12466851, 16141072, 16141073			gb:BB358264 /DB_XREF=gi:9070092 /DB_XREF=BB358264 /CLONE=C030027H14 /FEA=EST /CNT=7 /TID=Mm.39282.1 /TIER=ConsEnd /STK=3 /UG=Mm.39282 /LL=103287 /UG_GENE=AI836126 /UG_TITLE=expressed sequence AI836126
1441071_at	control	15.8516	3.0518	PPP-PAA	261.43	11.8424	85.67	15.1196	275.1	255	254.2	92.8	95.9	68.3	Kcnq5	potassium voltage-gated channel, subfamily Q, member 5	1	1 A5	-21387315	BB181225	226922	8889548, 10349636, 11042159, 11076861, 11217851, 12466851, 15963599, 16141072, 16141073	GO:0006810: transport, GO:0006811: ion transport, GO:0006813: potassium ion transport, GO:0008076: voltage-gated potassium channel complex, GO:0016020: membrane, GO:0016021: integral to membrane, GO:0005216: ion channel activity, GO:0005244: voltage-gated ion channel activity, GO:0005249: voltage-gated potassium channel activity, GO:0005267: potassium channel activity, GO:0030955: potassium ion b…		gb:BB181225 /DB_XREF=gi:16270053 /DB_XREF=BB181225 /CLONE=A230089O20 /FEA=EST /CNT=6 /TID=Mm.165748.1 /TIER=ConsEnd /STK=4 /UG=Mm.165748 /UG_TITLE=ESTs
1449456_a_at	control	15.7662	5.061	PPP-AAA	473.2	34.0378	93.5	24.1129	433.9	492.4	493.3	119.4	89.4	71.7	Cma1	chymase 1, mast cell	14	14 C3	-54895522	NM_010780	17228	1376147, 1939089, 2060576, 7959952, 8018917, 8098710, 8996238, 9360993, 9376586, 9379034, 9541598, 10737774, 11398967, 11973313, 12444981, 12466851, 14578624, 15905575, 15919053, 16777228, 16807745, 16807746, 17142727	GO:0006508: proteolysis, GO:0005615: extracellular space, GO:0004252: serine-type endopeptidase activity, GO:0008233: peptidase activity, GO:0016787: hydrolase activity, GO:0030271: chymase activity		gb:NM_010780.1 /DB_XREF=gi:6857811 /GEN=Mcpt5 /FEA=FLmRNA /CNT=17 /TID=Mm.1252.1 /TIER=FL+Stack /STK=10 /UG=Mm.1252 /LL=17228 /DEF=Mus musculus mast cell protease 5 (Mcpt5), mRNA. /PROD=mast cell protease 5 /FL=gb:M68898.1 gb:M73759.1 gb:NM_010780.1
1424886_at	control	15.7188	10.4877	PPP-PAA	766.3	65.3367	73.07	39.5739	772	698.3	828.6	115.4	37	66.8	Ptprd	protein tyrosine phosphatase, receptor type, D	4	4 C3	-75412469	BC025145	19266	7595475, 7733931, 7832766, 7988677, 8267598, 8355697, 8875997, 8889548, 8989520, 9566880, 9784606, 10101124, 10349636, 10856223, 11042159, 11076861, 11217851, 11978849, 12205107, 12466851, 12477932, 15172686, 15684034, 16141072, 16141073, 16373427, 16738228	GO:0006470: protein amino acid dephosphorylation, GO:0006470: protein amino acid dephosphorylation, GO:0006796: phosphate metabolic process, GO:0007155: cell adhesion, GO:0007185: transmembrane receptor protein tyrosine phosphatase signaling pathway, GO:0007185: transmembrane receptor protein tyrosine phosphatase signaling pathway, GO:0005886: plasma membrane, GO:0005887: integral to plasma membr…		gb:BC025145.1 /DB_XREF=gi:19263605 /FEA=FLmRNA /CNT=45 /TID=Mm.89191.1 /TIER=FL+Stack /STK=12 /UG=Mm.89191 /LL=19266 /UG_GENE=Ptprd /DEF=Mus musculus, clone MGC:36851 IMAGE:4223353, mRNA, complete cds. /PROD=Unknown (protein for MGC:36851) /FL=gb:BC025145.1 gb:AF326560.1 gb:AF326559.1
1422868_s_at	control	15.595	6.5203	PPP-PPP	590.3	49.8835	90.53	24.3428	544.9	582.3	643.7	114	92.2	65.4	Gda	guanine deaminase	19	19 B	-21458404	NM_010266	14544	6375655, 8889548, 10075721, 10349636, 10725249, 10922068, 11042159, 11076861, 11217851, 11962625, 12466851, 12477932, 15368895, 16141072, 16141073	GO:0005615: extracellular space, GO:0008270: zinc ion binding, GO:0008892: guanine deaminase activity, GO:0016787: hydrolase activity	00230: Purine metabolism	gb:NM_010266.1 /DB_XREF=gi:6753959 /GEN=Gda /FEA=FLmRNA /CNT=51 /TID=Mm.45054.1 /TIER=FL+Stack /STK=9 /UG=Mm.45054 /LL=14544 /DEF=Mus musculus guanine deaminase (Gda), mRNA. /PROD=guanine deaminase /FL=gb:AF174583.1 gb:NM_010266.1
1452412_at	control	15.5775	49.0668	PPP-PAA	1957.77	211.301	39.9	28.7345	1798.2	1877.7	2197.4	47.6	64	8.1	Hoxc8	homeo box C8	15	15 F3	102818572	BB283726	15426	1348969, 1353983, 1354638, 1358459, 1358803, 1360875, 1363091, 1379621, 1680565, 1683707, 1685115, 1686012, 1696731, 1723949, 1971213, 1975491, 1976088, 1978325, 2570032, 2575552, 2877873, 2881353, 2895723, 2900757, 2904354, 3007994, 7547473, 7585967, 7601910, 7753831, 7768176, 7779685, 7911971, 7915631, 7959778, 8099712, 8103190, 8104467, 8575334, 8625838, 8637890, 8649375, 8754282, 8790382, 883…	GO:0006350: transcription, GO:0006355: regulation of transcription, DNA-dependent, GO:0007275: multicellular organismal development, GO:0007389: pattern specification process, GO:0009887: organ morphogenesis, GO:0030182: neuron differentiation, GO:0045449: regulation of transcription, GO:0005634: nucleus, GO:0005667: transcription factor complex, GO:0003677: DNA binding, GO:0003700: transcription…		gb:BB283726 /DB_XREF=gi:8984175 /DB_XREF=BB283726 /CLONE=A930103C21 /FEA=mRNA /CNT=26 /TID=Mm.6167.1 /TIER=ConsEnd /STK=3 /UG=Mm.6167 /LL=15426 /UG_GENE=Hoxc8 /UG_TITLE=homeo box C8
1422789_at	control	15.5772	12.9913	AAP-AAA	149.83	14.7805	11.53	4.2442	141.2	141.4	166.9	8.6	9.6	16.4	Aldh1a2	aldehyde dehydrogenase family 1, subfamily A2	9	9 D	71014408	NM_009022	19378	8393814, 8797830, 9022057, 9106168, 9676192, 9819382, 9826179, 10192377, 10192400, 10204534, 10331979, 10349636, 10482234, 10570467, 10588879, 10654602, 10753524, 10837133, 10858567, 10862743, 10864957, 10892744, 10906479, 10922068, 11025231, 11042159, 11076861, 11134352, 11138002, 11144352, 11217851, 11231062, 11245568, 11386761, 11472854, 11562352, 11688558, 11744377, 11744378, 11747070, 117490…	GO:0001747: eye development (sensu Mammalia), GO:0008152: metabolic process, GO:0008284: positive regulation of cell proliferation, GO:0009855: determination of bilateral symmetry, GO:0009952: anterior/posterior pattern formation, GO:0009954: proximal/distal pattern formation, GO:0014032: neural crest cell development, GO:0016331: morphogenesis of embryonic epithelium, GO:0030182: neuron differen…	00830: Retinol metabolism	gb:NM_009022.1 /DB_XREF=gi:6677664 /GEN=Aldh1a2 /FEA=FLmRNA /CNT=21 /TID=Mm.42016.1 /TIER=FL+Stack /STK=12 /UG=Mm.42016 /LL=19378 /DEF=Mus musculus aldehyde dehydrogenase family 1, subfamily A2 (Aldh1a2), mRNA. /PROD=alcohol dehydrogenase family 1, subfamily A2 /FL=gb:NM_009022.1
1436659_at	control	15.5293	10.9656	PPP-AAA	595.43	40.4656	54.3	44.7799	606.8	550.5	629	93.1	64.5	5.3	Dcamkl1	doublecortin and calcium/calmodulin-dependent protein kinase-like 1	3	3 D	55330556	BB757120	13175	8889548, 9747029, 10036192, 10349636, 10533048, 11042159, 11076861, 11217851, 11473121, 11479289, 11597766, 11884394, 12465718, 12466851, 12477932, 14741399, 15226823, 15782199, 16141072, 16141073, 16387637, 16387638, 16387639, 16684769, 16869982	GO:0001764: neuron migration, GO:0006468: protein amino acid phosphorylation, GO:0007242: intracellular signaling cascade, GO:0007275: multicellular organismal development, GO:0007399: nervous system development, GO:0007409: axonogenesis, GO:0007420: brain development, GO:0021952: central nervous system projection neuron axonogenesis, GO:0030154: cell differentiation, GO:0030900: forebrain develo…		gb:BB757120 /DB_XREF=gi:16203363 /DB_XREF=BB757120 /CLONE=G270081L18 /FEA=EST /CNT=9 /TID=Mm.204959.1 /TIER=Stack /STK=8 /UG=Mm.204959 /UG_TITLE=ESTs
1421307_at	control	15.4726	4.485	PPP-AAP	354.77	27.999	79.1	12.9742	386.1	346	332.2	91.2	80.7	65.4	Car13	carbonic anhydrase 13	3	3 A2	14618519	AK010166	71934	10349636, 11042159, 11076861, 11217851, 12466851, 12477932, 15782199, 16141072, 16141073	GO:0006730: one-carbon compound metabolic process, GO:0004089: carbonate dehydratase activity, GO:0008270: zinc ion binding, GO:0016829: lyase activity, GO:0046872: metal ion binding	00910: Nitrogen metabolism	gb:NM_024495.1 /DB_XREF=gi:13374566 /GEN=Car13 /FEA=FLmRNA /CNT=11 /TID=Mm.158776.1 /TIER=FL /STK=2 /UG=Mm.158776 /LL=71934 /DEF=Mus musculus carbonic anhydrase 13 (Car13), mRNA. /PROD=carbonic anhydrase 13 /FL=gb:AF231123.1 gb:NM_024495.1
1426464_at	control	15.4675	10.2044	PPP-AAA	857.17	80.2233	84	32.5609	774.5	934.7	862.3	114.9	50	87.1	Nr1d1	nuclear receptor subfamily 1, group D, member 1	11	11 D	-98584024	W13191	217166	7838158, 10349636, 10704394, 10707952, 11042159, 11076861, 11217851, 12150932, 12466851, 12477932, 15374821, 15618518, 15782199, 16141072, 16141073, 16687287, 16968709	GO:0006350: transcription, GO:0006355: regulation of transcription, DNA-dependent, GO:0007623: circadian rhythm, GO:0005634: nucleus, GO:0003677: DNA binding, GO:0003700: transcription factor activity, GO:0003707: steroid hormone receptor activity, GO:0004872: receptor activity, GO:0008270: zinc ion binding, GO:0043565: sequence-specific DNA binding, GO:0046872: metal ion binding	04710: Circadian rhythm	gb:W13191 /DB_XREF=gi:1287464 /DB_XREF=mb31g11.r1 /CLONE=IMAGE:331076 /FEA=FLmRNA /CNT=109 /TID=Mm.193097.1 /TIER=Stack /STK=13 /UG=Mm.193097 /UG_TITLE=Mus musculus, Similar to nuclear receptor subfamily 1, group D, member 1, clone MGC:6402 IMAGE:3585478, mRNA, complete cds /FL=gb:BC008989.1
1419378_a_at	control	15.3948	33.3702	PPP-AAA	573.97	61.9831	17.2	9.057	609	610.5	502.4	24.6	19.9	7.1	Fxyd2	FXYD domain-containing ion transport regulator 2	9	9 B	45154132, 45150212, 45157071	NM_052823	11936	8387529, 9396759, 9600999, 10349636, 10950925, 11042159, 11062458, 11076861, 11217851, 11526196, 12466851, 12477932, 15383396, 15572522, 15755730, 16141072, 16141073, 16403837, 16804105	GO:0006810: transport, GO:0006811: ion transport, GO:0006813: potassium ion transport, GO:0006814: sodium ion transport, GO:0016020: membrane, GO:0016021: integral to membrane, GO:0005216: ion channel activity, GO:0030955: potassium ion binding, GO:0031402: sodium ion binding		gb:NM_052823.1 /DB_XREF=gi:16554571 /GEN=Fxyd2 /FEA=FLmRNA /CNT=30 /TID=Mm.22742.1 /TIER=FL+Stack /STK=10 /UG=Mm.22742 /LL=11936 /DEF=Mus musculus FXYD domain-containing ion transport regulator 2 (Fxyd2), transcript variant b, mRNA. /PROD=FXYD domain-containing ion transport regulator2, isoform b /FL=gb:NM_052823.1
1423164_at	control	15.3851	10.2769	AAP-AAA	165.8	16.1397	16.13	4.8387	147.3	177	173.1	14.4	21.6	12.4	Gpr137b	G protein-coupled receptor 137B	13	13 A1	-12670181	AK010724	83924	8858346, 8889548, 9321480, 9389538, 9521871, 10349636, 10725249, 10922068, 11042159, 11076861, 11110696, 11217851, 11440986, 11472062, 12446740, 12466851, 12477932, 14623818, 15782199, 16141072, 16141073	GO:0016021: integral to membrane		gb:BB325447 /DB_XREF=gi:16403566 /DB_XREF=BB325447 /CLONE=B430117A11 /FEA=FLmRNA /CNT=115 /TID=Mm.1585.1 /TIER=Stack /STK=36 /UG=Mm.1585 /LL=83924 /UG_GENE=Tm7sf1 /UG_TITLE=transmembrane 7 superfamily member 1 /FL=gb:BC003212.1 gb:NM_031999.1 gb:AF154337.1
1437463_x_at	control	15.3196	3.3085	PPP-PPP	1325.37	102.706	400.6	19.5745	1352.9	1211.7	1411.5	383.6	422	396.2	Tgfbi	transforming growth factor, beta induced	13	13 38.0 cM	56619230	BB532080	21810	8024701, 10349636, 10913330, 10922068, 11042159, 11076861, 11217851, 11353389, 11598925, 12466851, 12704192, 12838408, 12963107, 14531791, 14967934, 15328023, 15604097, 15780949, 15907457, 16141072, 16141073, 16537572	GO:0007155: cell adhesion, GO:0005578: extracellular matrix (sensu Metazoa), GO:0005615: extracellular space, GO:0005615: extracellular space, GO:0005515: protein binding		gb:BB532080 /DB_XREF=gi:9584009 /DB_XREF=BB532080 /CLONE=E030022D14 /FEA=EST /CNT=18 /TID=Mm.14455.2 /TIER=Stack /STK=18 /UG=Mm.14455 /LL=21810 /UG_GENE=Tgfbi /UG_TITLE=transforming growth factor, beta induced, 68 kDa
1424392_at	control	15.2884	7.366	PPP-PPP	2016.33	191.637	273.73	47.4433	1996.3	2217.2	1835.5	247.5	245.2	328.5	Adhfe1	alcohol dehydrogenase, iron containing, 1	1	1 A2	9533293	BC026584	76187	8889548, 10349636, 11042159, 11076861, 11217851, 12466851, 12477932, 16141072, 16141073	GO:0008152: metabolic process, GO:0005506: iron ion binding, GO:0016491: oxidoreductase activity, GO:0046872: metal ion binding, GO:0050093: methanol dehydrogenase activity		gb:BC026584.1 /DB_XREF=gi:20072015 /FEA=FLmRNA /CNT=93 /TID=Mm.28514.1 /TIER=FL+Stack /STK=34 /UG=Mm.28514 /LL=76187 /UG_GENE=6330565B14Rik /DEF=Mus musculus, clone MGC:37234 IMAGE:4972323, mRNA, complete cds. /PROD=Unknown (protein for MGC:37234) /FL=gb:BC026584.1
1416527_at	control	15.2735	10	PPP-PMA	936.67	90.0996	93.67	31.9539	920.1	1033.9	856	110.8	113.4	56.8	Rab32	RAB32, member RAS oncogene family	10	10 A1	-10235228	NM_026405	67844	10349636, 10725249, 11042159, 11076861, 11217851, 12466851, 12477932, 14499590, 15782199, 16141072, 16141073	GO:0006468: protein amino acid phosphorylation, GO:0006886: intracellular protein transport, GO:0007264: small GTPase mediated signal transduction, GO:0015031: protein transport, GO:0005739: mitochondrion, GO:0000166: nucleotide binding, GO:0004672: protein kinase activity, GO:0005524: ATP binding, GO:0005525: GTP binding		gb:NM_026405.1 /DB_XREF=gi:13385895 /GEN=2810011A17Rik /FEA=FLmRNA /CNT=134 /TID=Mm.31486.1 /TIER=FL+Stack /STK=83 /UG=Mm.31486 /LL=67844 /DEF=Mus musculus RIKEN cDNA 2810011A17 gene (2810011A17Rik), mRNA. /PROD=RIKEN cDNA 2810011A17 /FL=gb:NM_026405.1 gb:BC016409.1
1423280_at	control	15.2281	7.9752	PAP-AAA	171.73	10.982	21.53	13.0864	179	159.1	177.1	35.4	19.8	9.4	Stmn2	stathmin-like 2	3	3 A1	8492599	BM115022	20257	1321646, 1438949, 7789282, 7871435, 8288240, 8565076, 8607991, 8845150, 8889548, 9053319, 9108377, 9389448, 9539122, 9539123, 9876181, 10349636, 10398684, 10640277, 10804168, 10804175, 10835627, 10976052, 11042159, 11044402, 11076861, 11217851, 11226711, 11336497, 11502253, 11640898, 11784856, 11825874, 11934853, 12023301, 12210140, 12466851, 12477932, 15064766, 15173589, 15328020, 15456728, 1549…	GO:0007242: intracellular signaling cascade, GO:0016020: membrane, GO:0030426: growth cone, GO:0005515: protein binding		gb:BM946869 /DB_XREF=gi:19430454 /DB_XREF=UI-M-EM0-bvm-o-15-0-UI.r1 /CLONE=IMAGE:5694182 /FEA=FLmRNA /CNT=227 /TID=Mm.29580.1 /TIER=Stack /STK=18 /UG=Mm.29580 /LL=20257 /UG_GENE=Scgn10 /UG_TITLE=superiorcervical ganglia, neural specific 10 /FL=gb:BC026538.1 gb:NM_025285.1
1438398_at	control	15.1575	1.7171	PPP-PPP	1111.17	42.8715	647.13	31.2041	1159.4	1096.7	1077.4	612.4	656.2	672.8	Rbm39	RNA binding motif protein 39	2	2 H1	-155838683	BB203348	170791	10349636, 10725249, 10922068, 11042159, 11076861, 11217851, 11704680, 12466851, 12477932, 12904583, 15226823, 15582152, 15782199, 16033648, 16141072, 16141073	GO:0006350: transcription, GO:0006355: regulation of transcription, DNA-dependent, GO:0006397: mRNA processing, GO:0008380: RNA splicing, GO:0005634: nucleus, GO:0000166: nucleotide binding, GO:0003676: nucleic acid binding, GO:0003713: transcription coactivator activity, GO:0003723: RNA binding, GO:0005515: protein binding		gb:BM239446 /DB_XREF=gi:17874716 /DB_XREF=K0534F02-3 /CLONE=K0534F02 /FEA=EST /CNT=67 /TID=Mm.17307.3 /TIER=Stack /STK=10 /UG=Mm.17307 /LL=170791 /UG_GENE=Rnpc2 /UG_TITLE=RNA-binding region (RNP1, RRM) containing 2
1452143_at	control	15.1258	2.9738	PPP-PPP	21792	1472.01	7327.87	759.239	21379.2	23426.3	20570.4	8096.7	7308.3	6578.6	Spnb2	spectrin beta 2	11	11 A3.3	-29999395, -30006842	BQ174069	20742	1638088, 1742606, 3862089, 7565694, 7671812, 7698769, 8199405, 8288233, 8479293, 8751373, 8776664, 8827514, 8889548, 9196007, 9211987, 9321482, 9551868, 9653646, 9927192, 10349636, 10922068, 11042159, 11076861, 11210191, 11217851, 11294830, 11544199, 11564759, 11923214, 12149647, 12466851, 12477932, 12543979, 15262991, 15566516, 15610403, 15899814, 16141072, 16141073, 16288220, 16551741, 16650383…	GO:0006306: DNA methylation, GO:0007182: common-partner SMAD protein phosphorylation, GO:0007184: SMAD protein nuclear translocation, GO:0051016: barbed-end actin filament capping, GO:0005634: nucleus, GO:0005856: cytoskeleton, GO:0005886: plasma membrane, GO:0016020: membrane, GO:0003677: DNA binding, GO:0003779: actin binding, GO:0005515: protein binding, GO:0005516: calmodulin binding	04530: Tight junction	gb:BQ174069 /DB_XREF=gi:20349560 /DB_XREF=UI-M-DJ2-bvv-d-04-0-UI.s1 /CLONE=UI-M-DJ2-bvv-d-04-0-UI /FEA=mRNA /CNT=277 /TID=Mm.220989.1 /TIER=Stack /STK=167 /UG=Mm.220989 /UG_TITLE=Mus musculus, clone IMAGE:5361724, mRNA, partial cds
1455647_at	control	15.1243	3.9178	PPP-PPP	1543.6	117.462	394	59.4598	1413.6	1575.1	1642.1	327.7	411.7	442.6	Ar	androgen receptor	X	X C3	94352468	BB148302	11835	123850, 179788, 564230, 744116, 939201, 1385960, 1423334, 1628813, 1632191, 1675191, 1681426, 1686053, 1740345, 1772416, 1797229, 1822400, 1883336, 1924321, 1974879, 2034278, 2034279, 2041777, 2055107, 2178222, 2293028, 2403358, 2721933, 2739660, 2766275, 2895445, 2899541, 2912700, 3408476, 4108517, 4354015, 5284427, 5289439, 5452809, 6105650, 6887886, 7262021, 7511785, 7590750, 7599695, 7719348,…	GO:0001701: embryonic development (sensu Mammalia), GO:0006350: transcription, GO:0006355: regulation of transcription, DNA-dependent, GO:0008584: male gonad development, GO:0009987: cellular process, GO:0016049: cell growth, GO:0019102: male somatic sex determination, GO:0030521: androgen receptor signaling pathway, GO:0045449: regulation of transcription, GO:0005634: nucleus, GO:0005634: nucleu…		gb:BB148302 /DB_XREF=gi:16267757 /DB_XREF=BB148302 /CLONE=9930108B21 /FEA=EST /CNT=34 /TID=Mm.39005.1 /TIER=Stack /STK=9 /UG=Mm.39005 /LL=103030 /UG_GENE=AW320017 /UG_TITLE=expressed sequence AW320017
1436568_at	control	15.0127	7.1411	PPP-PPP	1276.83	79.3331	178.8	98.7664	1207.6	1259.5	1363.4	268.9	194.3	73.2	Jam2	junction adhesion molecule 2	16	16 C3.3	84657024	AU016127	67374	8889548, 10349636, 10725249, 10779521, 11036763, 11042159, 11076861, 11217851, 11978082, 12239159, 12466851, 12466854, 12466855, 12476045, 12477932, 14519386, 16093349, 16141072, 16141073, 16297198, 16914739	GO:0005615: extracellular space, GO:0005923: tight junction, GO:0016020: membrane, GO:0016021: integral to membrane	04514: Cell adhesion molecules (CAMs), 04530: Tight junction, 04670: Leukocyte transendothelial migration	gb:AU016127 /DB_XREF=gi:3371131 /DB_XREF=AU016127 /CLONE=J0720H11 /FEA=EST /CNT=19 /TID=Mm.25963.1 /TIER=Stack /STK=8 /UG=Mm.25963 /LL=106318 /UG_GENE=AU016127 /UG_TITLE=expressed sequence AU016127
1443363_at	control	14.9846	26.3252	PPP-AAA	180.77	19.8137	6.87	3.3858	182.6	160.1	199.6	6.3	3.8	10.5	A430107O13Rik	RIKEN cDNA A430107O13 gene	6	6 A3.1	21935910	BB470362	214642	10349636, 11042159, 11076861, 11217851, 12466851, 16141072, 16141073			gb:BB470362 /DB_XREF=gi:16427758 /DB_XREF=BB470362 /CLONE=D230033F14 /FEA=EST /CNT=3 /TID=Mm.130466.1 /TIER=ConsEnd /STK=3 /UG=Mm.130466 /UG_TITLE=ESTs
1436338_at	control	14.8179	8.1713	PPP-PPP	9873.63	998.469	1208.33	170.262	8747.9	10652.1	10220.9	1311.1	1011.8	1302.1	Ppp2r1b	protein phosphatase 2 (formerly 2A), regulatory subunit A (PR 65), beta isoform	9	9 A5.3	50609164	BF730541	73699	8889548, 10349636, 10922068, 11042159, 11076861, 11217851, 12466851, 12477932, 16141072, 16141073	GO:0005488: binding	04310: Wnt signaling pathway, 04530: Tight junction, 04730: Long-term depression	gb:BF730541 /DB_XREF=gi:12048405 /DB_XREF=mab64g07.x1 /CLONE=IMAGE:3975348 /FEA=EST /CNT=23 /TID=Mm.35625.1 /TIER=Stack /STK=9 /UG=Mm.35625 /UG_TITLE=ESTs
1416326_at	control	14.8103	5.616	PPP-PPP	5802.27	205.785	1033.17	518.392	5712.4	6037.7	5656.7	1520.8	1090	488.7	Crip1	cysteine-rich protein 1 (intestinal)	12	12 F1	113599819	NM_007763	12925	1360279, 1794043, 3085096, 3186715, 7724703, 7999070, 10349636, 10922068, 11042159, 11076861, 11217851, 12006348, 12370427, 12466851, 12477932, 12839623, 15175647, 16141072, 16141073, 16183747	GO:0008270: zinc ion binding, GO:0008270: zinc ion binding, GO:0046872: metal ion binding		gb:NM_007763.1 /DB_XREF=gi:6681014 /GEN=Crip /FEA=FLmRNA /CNT=167 /TID=Mm.22049.1 /TIER=FL+Stack /STK=97 /UG=Mm.22049 /LL=12925 /DEF=Mus musculus cysteine rich intestinal protein (Crip), mRNA. /PROD=cysteine rich intestinal protein /FL=gb:NM_007763.1 gb:M13018.1
1456718_at	control	14.7993	2.7968	PPP-PPP	334.03	9.223	119.43	23.3612	337.4	341.1	323.6	96.5	143.2	118.6	Tmem56	transmembrane protein 56	3	3 G3	-121194034	BB768133	99887	10349636, 10725249, 10922068, 11042159, 11076861, 11217851, 12466851, 12477932, 16141072, 16141073	GO:0016021: integral to membrane		gb:BB768133 /DB_XREF=gi:16196853 /DB_XREF=BB768133 /CLONE=G370081N12 /FEA=EST /CNT=8 /TID=Mm.23325.1 /TIER=Stack /STK=8 /UG=Mm.23325 /UG_TITLE=ESTs
1423911_at	control	14.7224	4.0782	PPP-PPP	9968.87	838.467	2444.43	283.903	9627.9	10924.1	9354.6	2475.2	2711.7	2146.4	Ppp2r5a	protein phosphatase 2, regulatory subunit B (B56), alpha isoform	1	1 H6	-193052595	BC023062	226849	8889548, 10349636, 11042159, 11076861, 11217851, 12466851, 12477932, 15095873, 15226823, 16141072, 16141073	GO:0007165: signal transduction, GO:0000159: protein phosphatase type 2A complex, GO:0005488: binding, GO:0008601: protein phosphatase type 2A regulator activity		gb:BC023062.1 /DB_XREF=gi:18606204 /FEA=FLmRNA /CNT=149 /TID=Mm.205569.1 /TIER=FL+Stack /STK=81 /UG=Mm.205569 /DEF=Mus musculus, clone MGC:38798 IMAGE:5359803, mRNA, complete cds. /PROD=Unknown (protein for MGC:38798) /FL=gb:BC023062.1
1455340_at	control	14.7112	6.8089	PPP-PPM	767.13	67.6302	112.67	36.927	788.9	691.3	821.2	116.2	147.7	74.1	AI852444	expressed sequence AI852444	6			BB763709	101188	8889548			gb:BB763709 /DB_XREF=gi:16196403 /DB_XREF=BB763709 /CLONE=G370029L04 /FEA=EST /CNT=25 /TID=Mm.22883.1 /TIER=Stack /STK=16 /UG=Mm.22883 /LL=101188 /UG_GENE=AI852444 /UG_TITLE=expressed sequence AI852444
1435261_at	control	14.6933	3.611	PPP-PAP	437.53	23.9792	121.17	28.5623	410.1	454.5	448	150.2	93.1	120.2	4732416N19Rik	RIKEN cDNA 4732416N19 gene	6	6 G3		BQ174442	320737	8889548, 10349636, 11042159, 11076861, 11217851, 12466851, 16141072, 16141073			gb:BQ174442 /DB_XREF=gi:20349933 /DB_XREF=UI-M-DJ2-bvy-i-07-0-UI.s1 /CLONE=UI-M-DJ2-bvy-i-07-0-UI /FEA=EST /CNT=40 /TID=Mm.23956.1 /TIER=Stack /STK=18 /UG=Mm.23956 /UG_TITLE=ESTs, Weakly similar to F32D1.3.p (Caenorhabditis elegans) (C.elegans)
1452798_s_at	control	14.6789	3.066	PPP-PPP	888.93	54.9349	289.93	44.4722	951.5	848.6	866.7	314.4	238.6	316.8	Mapk1ip1	mitogen activated protein kinase 1 interacting protein 1	7	7 F4	-138674162	AK009250	69546	8889548, 10349636, 10725249, 10922068, 11042159, 11076861, 11217851, 11591653, 12011110, 12466851, 12477932, 16141072, 16141073	GO:0007126: meiosis, GO:0007275: multicellular organismal development, GO:0042802: identical protein binding		gb:AK009250.1 /DB_XREF=gi:12843928 /FEA=mRNA /CNT=55 /TID=Mm.31598.1 /TIER=Stack /STK=39 /UG=Mm.31598 /LL=69546 /UG_GENE=2310009E07Rik /UG_TITLE=RIKEN cDNA 2310009E07 gene /DEF=Mus musculus adult male tongue cDNA, RIKEN full-length enriched library, clone:2310009E07:hypothetical protein, full insert sequence.
1438930_s_at	control	14.609	1.9577	PPP-PPP	551.3	31.8134	281.6	3.2187	559.8	516.1	578	285	281.2	278.6	Mecp2	methyl CpG binding protein 2	X	X A7.3	-70279549	BB130002	17257	2180582, 8001979, 8563762, 8589515, 8769643, 9160753, 9171351, 9774669, 10349636, 10369871, 10723722, 10888872, 11042159, 11058114, 11076861, 11217851, 11242117, 11242118, 11371345, 11809720, 12160743, 12427740, 12442230, 12466851, 12477932, 12727440, 12928486, 14519686, 14593183, 14593184, 14643676, 14973779, 15034150, 15069197, 15115765, 15342650, 15345242, 15351775, 15492925, 15519245, 1554854…	GO:0006350: transcription, GO:0006355: regulation of transcription, DNA-dependent, GO:0007585: respiratory gaseous exchange, GO:0008284: positive regulation of cell proliferation, GO:0008344: adult locomotory behavior, GO:0016358: dendrite development, GO:0016481: negative regulation of transcription, GO:0042551: neuron maturation, GO:0045892: negative regulation of transcription, DNA-dependent, …		gb:BB130002 /DB_XREF=gi:8784392 /DB_XREF=BB130002 /CLONE=9630042O22 /FEA=EST /CNT=9 /TID=Mm.200278.1 /TIER=Stack /STK=9 /UG=Mm.200278 /LL=103059 /UG_GENE=BB130002 /UG_TITLE=expressed sequence BB130002
1421425_a_at	control	14.5732	16.4903	PPP-APA	653.57	65.4309	39.63	32.2959	594	643.1	723.6	53	63.1	2.8	Dscr1l1	Down syndrome critical region gene 1-like 1	17	17 C	43264905, 43416245	NM_030598	53901	8889548, 10349636, 10722714, 10756093, 11042159, 11076861, 11080588, 11217851, 12466851, 12477932, 12515860, 15012624, 15475267, 16141072, 16141073, 16648267	GO:0019722: calcium-mediated signaling, GO:0000166: nucleotide binding		gb:AB061524.1 /DB_XREF=gi:16904644 /GEN=ZAKI-4 /FEA=FLmRNA /CNT=6 /TID=Mm.41696.1 /TIER=FL /STK=1 /UG=Mm.41696 /LL=53901 /DEF=Mus musculus mRNA for calcineurin inhibitory protein ZAKI-4, complete cds. /PROD=calcineurin inhibitory protein ZAKI-4 /FL=gb:AF237791.1 gb:AB061524.1 gb:AF237887.1 gb:NM_030598.1
1452843_at	control	14.5338	6.9797	PPP-PPP	3558	361.906	509.77	31.4681	3142.7	3725.4	3805.9	544.2	482.5	502.6	Il6st	interleukin 6 signal transducer	13	13 D2.2	113584986	AK017211	16195	1542794, 1602143, 1915266, 7621883, 8552649, 8607969, 8666978, 8843390, 8889548, 9122220, 9324354, 9348227, 9500603, 9558387, 9743535, 9815272, 9874564, 9933112, 9988212, 10205167, 10219240, 10349636, 10486560, 10564261, 10661409, 10725249, 10922068, 10989258, 11042159, 11076861, 11160399, 11217851, 11275690, 11457894, 11493552, 11567054, 11877449, 12047380, 12070777, 12097503, 12147685, 12219085…	GO:0007165: signal transduction, GO:0008284: positive regulation of cell proliferation, GO:0008593: regulation of Notch signaling pathway, GO:0005615: extracellular space, GO:0016020: membrane, GO:0016021: integral to membrane, GO:0004872: receptor activity, GO:0004896: hematopoietin/interferon-class (D200-domain) cytokine receptor activity, GO:0005515: protein binding	04060: Cytokine-cytokine receptor interaction, 04630: Jak-STAT signaling pathway	gb:AK017211.1 /DB_XREF=gi:12856338 /FEA=mRNA /CNT=68 /TID=Mm.25142.1 /TIER=Stack /STK=31 /UG=Mm.25142 /LL=71317 /UG_GENE=5133400A03Rik /UG_TITLE=RIKEN cDNA 5133400A03 gene /DEF=Mus musculus 10 days neonate intestine cDNA, RIKEN full-length enriched library, clone:5133400A03:unclassifiable transcript, full insert sequence.
1421917_at	control	14.5144	16.5838	PPP-PPP	3588.73	384.217	216.4	119.697	3900.8	3705.8	3159.6	353.9	159.8	135.5	Pdgfra	platelet derived growth factor receptor, alpha polypeptide	5	5 C3.3	75434040	AW537708	18595	863250, 1292572, 1315306, 1321404, 1322269, 1322271, 1372902, 1451656, 1638976, 1647018, 1683707, 1711190, 1711435, 1717995, 1846043, 1869533, 2155144, 2174116, 2536956, 2980249, 5529676, 6510711, 6628990, 7502236, 7537231, 7537375, 7540588, 7542761, 7550316, 7579892, 7588258, 7649812, 7678927, 7720681, 7958864, 8011581, 8041746, 8041773, 8043948, 8244376, 8318539, 8589683, 8643452, 8660874, 8661…	GO:0006468: protein amino acid phosphorylation, GO:0007169: transmembrane receptor protein tyrosine kinase signaling pathway, GO:0009653: anatomical structure morphogenesis, GO:0009887: organ morphogenesis, GO:0030198: extracellular matrix organization and biogenesis, GO:0030324: lung development, GO:0030539: male genitalia development, GO:0042475: odontogenesis (sensu Vertebrata), GO:0016020: me…	04010: MAPK signaling pathway, 04020: Calcium signaling pathway, 04060: Cytokine-cytokine receptor interaction, 04510: Focal adhesion, 04540: Gap junction, 04810: Regulation of actin cytoskeleton, 05210: Colorectal cancer, 05214: Glioma, 05218: Melanoma	gb:AW537708 /DB_XREF=gi:7180221 /DB_XREF=G0120F08-3 /CLONE=G0120F08 /FEA=FLmRNA /CNT=98 /TID=Mm.2924.1 /TIER=Stack /STK=10 /UG=Mm.2924 /LL=18595 /UG_GENE=Pdgfra /UG_TITLE=platelet derived growth factor receptor, alpha polypeptide /FL=gb:NM_011058.1 gb:M84607.1 gb:M57683.1
1418186_at	control	14.3979	6.3871	PPP-PPP	1800.53	176.805	281.9	45.9958	1601.9	1940.7	1859	239.5	275.4	330.8	Gstt1	glutathione S-transferase, theta 1	10	10 B5-C1	-75227530	BC012254	14871	8670055, 8761485, 9854036, 10051316, 10349636, 10613844, 11018744, 11042159, 11076861, 11217851, 11884241, 12038961, 12466851, 12477932, 16141072, 16141073	GO:0006749: glutathione metabolic process, GO:0005634: nucleus, GO:0004364: glutathione transferase activity, GO:0016740: transferase activity	00480: Glutathione metabolism, 00980: Metabolism of xenobiotics by cytochrome P450	gb:BC012254.1 /DB_XREF=gi:15126648 /FEA=FLmRNA /CNT=67 /TID=Mm.2746.1 /TIER=FL+Stack /STK=28 /UG=Mm.2746 /LL=14871 /UG_GENE=Gstt1 /DEF=Mus musculus, Similar to glutathione S-transferase, theta 1, clone MGC:19075 IMAGE:4193816, mRNA, complete cds. /PROD=Similar to glutathione S-transferase, theta 1 /FL=gb:NM_008185.1 gb:BC012254.1
1454200_at	control	14.3447	12.7512	PPP-AAA	179.37	16.7255	14.07	10.8914	173.2	198.3	166.6	6.9	26.6	8.7	Zeb2	zinc finger E-box binding homeobox 2	2	2 C1	-44805740, -44805642	AK012377	24136	8889548, 10349636, 10400677, 11042159, 11076861, 11217851, 11448942, 11451567, 11477103, 11592033, 11857784, 12466851, 12477932, 12522767, 12609600, 12693553, 13679026, 15006694, 15489854, 16127714, 16141072, 16141073, 16157277, 16162653, 16458080, 16516881, 16598713, 16919269, 16957952	GO:0001755: neural crest cell migration, GO:0001756: somitogenesis, GO:0001843: neural tube closure, GO:0006350: transcription, GO:0006355: regulation of transcription, DNA-dependent, GO:0007417: central nervous system development, GO:0016481: negative regulation of transcription, GO:0045449: regulation of transcription, GO:0048598: embryonic morphogenesis, GO:0005622: intracellular, GO:0005634: …		gb:AK012377.1 /DB_XREF=gi:12849079 /GEN=Zfhx1b /FEA=mRNA /CNT=1 /TID=Mm.220143.1 /TIER=ConsEnd /STK=0 /UG=Mm.220143 /UG_TITLE=Mus musculus 11 days embryo whole body cDNA, RIKEN full-length enriched library, clone:2700045H19:zinc finger homeobox 1b, full insert sequence /DEF=Mus musculus 11 days embryo whole body cDNA, RIKEN full-length enriched library, clone:2700045H19:zinc finger homeobox 1b, f…
1439616_at	control	14.3267	3.5447	PPP-PPP	2361.03	95.5701	666.07	181.264	2277.2	2340.8	2465.1	736.8	460.1	801.3						BB167055					gb:BB167055 /DB_XREF=gi:8822996 /DB_XREF=BB167055 /CLONE=A130091F22 /FEA=EST /CNT=8 /TID=Mm.31241.1 /TIER=ConsEnd /STK=7 /UG=Mm.31241 /LL=102718 /UG_GENE=AV026040 /UG_TITLE=expressed sequence AV026040
1446537_at	control	14.3246	7.131	PPP-PPM	600.67	53.6702	84.23	31.9181	593.4	551	657.6	100	105.2	47.5	Ga17	dendritic cell protein GA17	2	2 E2	-104800497	BB162318	98221	7671812, 8889548, 10349636, 10568747, 10725249, 10922068, 11042159, 11076861, 11217851, 11889558, 12466851, 12477932, 15782199, 16141072, 16141073			gb:BB162318 /DB_XREF=gi:16268683 /DB_XREF=BB162318 /CLONE=A130066K21 /FEA=EST /CNT=2 /TID=Mm.215494.1 /TIER=ConsEnd /STK=2 /UG=Mm.215494 /UG_TITLE=ESTs
1452461_a_at	control	14.2157	3.0322	PPP-PPP	310.3	22.5528	102.33	11.5509	290.6	334.9	305.4	109.3	89	108.7	Gnptab	N-acetylglucosamine-1-phosphate transferase, alpha and beta subunits	10	10 C1	87809210	L36434	432486	8001130, 10349636, 11042159, 11076861, 11217851, 12466851, 12477932, 15368895, 16141072, 16141073	GO:0030154: cell differentiation, GO:0016020: membrane, GO:0005509: calcium ion binding		gb:L36434.1 /DB_XREF=gi:625041 /FEA=mRNA /CNT=8 /TID=Mm.67919.2 /TIER=ConsEnd /STK=0 /UG=Mm.67919 /LL=16658 /UG_GENE=Mafb /DEF=Mus Musculus basic domainleucine zipper transcription factor mRNA, 3 end of cds. /PROD=basic domainleucine zipper transcriptionfactor
1448655_at	control	14.1377	7.599	PPP-PPP	2467.63	176.265	324.73	194.562	2392.6	2669	2341.3	549.3	218.1	206.8	Lrp1	low density lipoprotein receptor-related protein 1	10	10 B2-D1	-126941106	NM_008512	16971	1377168, 1423604, 1698775, 1702392, 7514554, 7542371, 7544347, 7595098, 7829084, 8013374, 8485155, 8798151, 9449704, 9634821, 9733098, 10349636, 10380922, 10482304, 10575007, 10922068, 11042159, 11067868, 11076861, 11208732, 11217851, 11248808, 11729193, 11867643, 12151109, 12169628, 12413896, 12466851, 12477932, 12499359, 12522008, 12531796, 12598530, 12690199, 12746448, 12821648, 12857755, 1287…	GO:0006897: endocytosis, GO:0007275: multicellular organismal development, GO:0030178: negative regulation of Wnt receptor signaling pathway, GO:0005624: membrane fraction, GO:0005634: nucleus, GO:0005905: coated pit, GO:0016020: membrane, GO:0016021: integral to membrane, GO:0004872: receptor activity, GO:0005509: calcium ion binding	05010: Alzheimer's disease	gb:NM_008512.1 /DB_XREF=gi:6678719 /GEN=Lrp1 /FEA=FLmRNA /CNT=182 /TID=Mm.7221.1 /TIER=FL+Stack /STK=49 /UG=Mm.7221 /LL=16971 /DEF=Mus musculus low density lipoprotein receptor-related protein 1 (Lrp1), mRNA. /PROD=low density lipoprotein receptor-related protein1 /FL=gb:AF367720.1 gb:NM_008512.1
1455481_at	control	14.1233	1.9691	PPP-PPP	4195.6	184.987	2130.77	172.926	4186	4015.6	4385.2	2034.6	2330.4	2027.3	Ids	iduronate 2-sulfatase	X	X A7.1	-66603736	BM241722	15931	1572654, 1937018, 8093671, 8325651, 8352760, 8439729, 8678976, 10349636, 11042159, 11076861, 11217851, 12466851, 12572850, 15149955, 15962010, 16141072, 16141073, 16174644, 16505002	GO:0008152: metabolic process, GO:0005615: extracellular space, GO:0005764: lysosome, GO:0016021: integral to membrane, GO:0004423: iduronate-2-sulfatase activity, GO:0005509: calcium ion binding, GO:0005515: protein binding, GO:0008484: sulfuric ester hydrolase activity, GO:0016787: hydrolase activity, GO:0046872: metal ion binding	00531: Glycosaminoglycan degradation, 01032: Glycan structures - degradation	gb:BM241722 /DB_XREF=gi:17876992 /DB_XREF=K0621B11-3 /CLONE=K0621B11 /FEA=EST /CNT=39 /TID=Mm.124592.1 /TIER=Stack /STK=12 /UG=Mm.124592 /LL=103028 /UG_GENE=AW214631 /UG_TITLE=expressed sequence AW214631
1420909_at	control	14.0941	3.3513	PPP-PPP	2221.1	167.268	662.77	93.2524	2297.3	2336.7	2029.3	662	569.9	756.4	Vegfa	vascular endothelial growth factor A	17	17 B3	-45480576	NM_009505	22339	1592003, 1644816, 7490564, 7534783, 7647376, 7681362, 7683699, 7803491, 7846076, 7933988, 8090202, 8119973, 8573716, 8602241, 8602242, 8602835, 8607868, 8614412, 8632007, 8637916, 8702615, 8756616, 8815891, 8968091, 9012504, 9113979, 9153276, 9166595, 9212753, 9256442, 9401819, 9446618, 9665379, 9665459, 9689915, 9778514, 9792673, 9806910, 9846489, 9861052, 10021335, 10022836, 10027394, 10027415,…	GO:0000074: regulation of progression through cell cycle, GO:0001525: angiogenesis, GO:0001525: angiogenesis, GO:0001525: angiogenesis, GO:0001568: blood vessel development, GO:0001666: response to hypoxia, GO:0006916: anti-apoptosis, GO:0007275: multicellular organismal development, GO:0007498: mesoderm development, GO:0008283: cell proliferation, GO:0016477: cell migration, GO:0016477: cell mig…	04060: Cytokine-cytokine receptor interaction, 04150: mTOR signaling pathway, 04370: VEGF signaling pathway, 04510: Focal adhesion, 05212: Pancreatic cancer	gb:AI606078 /DB_XREF=gi:4615245 /DB_XREF=ve83f01.x1 /CLONE=IMAGE:832825 /FEA=FLmRNA /CNT=129 /TID=Mm.31540.1 /TIER=Stack /STK=22 /UG=Mm.31540 /LL=22339 /UG_GENE=Vegfa /UG_TITLE=vascular endothelial growth factor A /FL=gb:M95200.1 gb:NM_009505.1
1454806_at	control	14.0292	6.6655	PPP-PPA	637	37.7592	95.57	55.1595	641	597.4	672.6	144.7	106.1	35.9	D12Ertd553e	DNA segment, Chr 12, ERATO Doi 553, expressed	12	12 A1.1	12302327	AV228737	76820	10349636, 10725249, 10922068, 11042159, 11076861, 11125038, 11217851, 11420610, 12466851, 12477932, 16141072, 16141073, 16516881	GO:0005622: intracellular		gb:AV228737 /DB_XREF=gi:16385581 /DB_XREF=AV228737 /CLONE=4631401M21 /FEA=EST /CNT=73 /TID=Mm.27563.1 /TIER=Stack /STK=45 /UG=Mm.27563 /LL=52507 /UG_GENE=D12Ertd553e /UG_TITLE=DNA segment, Chr 12, ERATO Doi 553, expressed
1439087_a_at	control	14.0198	2.8671	PPP-PPP	467.43	16.234	163.03	33.922	449	479.6	473.7	202	147	140.1	5830455E04Rik	RIKEN cDNA 5830455E04 gene	11			BB030508	109026	10922068, 11217851, 12466851			gb:BB030508 /DB_XREF=gi:16258162 /DB_XREF=BB030508 /CLONE=5830455E04 /FEA=EST /CNT=14 /TID=Mm.46653.2 /TIER=Stack /STK=8 /UG=Mm.46653 /LL=69766 /UG_GENE=1500004A08Rik /UG_TITLE=RIKEN cDNA 1500004A08 gene
1448925_at	control	13.9732	7.8108	PPP-APA	492.6	45.2795	63.07	28.0102	525.2	511.7	440.9	46.2	95.4	47.6	Twist2	twist homolog 2 (Drosophila)	1	1 D	93631882	NM_007855	13345	7589808, 8918877, 9050988, 10349636, 10769239, 11042159, 11044626, 11076861, 11217851, 12466851, 12553906, 12756187, 14654692, 15030764, 15371327, 15576404, 15618518, 16141072, 16141073, 16452166, 16783635, 17199045	GO:0006350: transcription, GO:0006355: regulation of transcription, DNA-dependent, GO:0006357: regulation of transcription from RNA polymerase II promoter, GO:0007275: multicellular organismal development, GO:0030154: cell differentiation, GO:0045449: regulation of transcription, GO:0045668: negative regulation of osteoblast differentiation, GO:0045892: negative regulation of transcription, DNA-d…		gb:NM_007855.1 /DB_XREF=gi:6681176 /GEN=Dermo1 /FEA=FLmRNA /CNT=62 /TID=Mm.9474.1 /TIER=FL+Stack /STK=31 /UG=Mm.9474 /LL=13345 /DEF=Mus musculus dermis expressed 1 (Dermo1), mRNA. /PROD=dermis expressed 1 /FL=gb:U36384.1 gb:NM_007855.1
1432176_a_at	control	13.9416	2.9694	PPP-PAA	837.67	43.0551	282.1	53.9467	836.9	795	881.1	342.1	266.6	237.6	Eng	endoglin	2	2 B	32468603	AK018588	13805	2034277, 7626790, 7774911, 7782079, 8125301, 8194490, 8799160, 8889548, 8950511, 9365121, 9371744, 10348742, 10349636, 10562293, 10562296, 10569981, 10625534, 10702387, 10892744, 11042159, 11044609, 11076861, 11217851, 11395379, 11744382, 12433697, 12438646, 12466851, 12477932, 12588999, 12624308, 12668501, 12941632, 12955076, 14701881, 14734648, 14747750, 15073150, 15085134, 15090446, 15322537, …	GO:0001525: angiogenesis, GO:0007155: cell adhesion, GO:0007507: heart development, GO:0017015: regulation of transforming growth factor beta receptor signaling pathway, GO:0045449: regulation of transcription, GO:0005615: extracellular space, GO:0016020: membrane, GO:0016021: integral to membrane, GO:0005488: binding, GO:0005515: protein binding		gb:AK018588.1 /DB_XREF=gi:12858371 /GEN=Eng /FEA=mRNA /CNT=1 /TID=Mm.4851.2 /TIER=ConsEnd /STK=0 /UG=Mm.4851 /LL=13805 /UG_TITLE=endoglin /DEF=Mus musculus adult male cecum cDNA, RIKEN full-length enriched library, clone:9130003M10:endoglin, full insert sequence.
1421346_a_at	control	13.9197	5.1107	PPP-PAA	1201.7	55.7778	235.13	106.555	1153.3	1189.1	1262.7	345.3	132.6	227.5	Slc6a6	solute carrier family 6 (neurotransmitter transporter, taurine), member 6	6	6 D1	91649598	NM_009320	21366	1465453, 7774940, 8641130, 8649829, 8889548, 9375654, 10349636, 10725249, 10922068, 11042159, 11076861, 11217851, 11772953, 11908948, 12466851, 12477932, 12824447, 14631140, 14734644, 15149840, 15226823, 15606752, 15630240, 15782199, 15914036, 16125675, 16141072, 16141073, 16421246, 16550472	GO:0001762: beta-alanine transport, GO:0006810: transport, GO:0006836: neurotransmitter transport, GO:0015734: taurine transport, GO:0015734: taurine transport, GO:0005887: integral to plasma membrane, GO:0016020: membrane, GO:0016021: integral to membrane, GO:0001761: beta-alanine transporter activity, GO:0005328: neurotransmitter:sodium symporter activity, GO:0005368: taurine transporter activi…		gb:NM_009320.1 /DB_XREF=gi:6678222 /GEN=Slc6a6 /FEA=FLmRNA /CNT=11 /TID=Mm.200518.1 /TIER=FL /STK=2 /UG=Mm.200518 /LL=21366 /DEF=Mus musculus solute carrier family 6 (neurotransmitter transporter, taurine), member 6 (Slc6a6), mRNA. /PROD=taurinebeta-alanine transporter /FL=gb:AF020194.2 gb:NM_009320.1
1417429_at	control	13.8625	21.4752	PPP-PPP	3303.6	387.009	153.83	71.443	3136.4	3028.3	3746.1	165.7	218.6	77.2	Fmo1	flavin containing monooxygenase 1	1	1 H1	-164666236	BC011229	14261	7473608, 9076656, 9186481, 9580872, 10349636, 11042159, 11076861, 11217851, 12466851, 12477932, 15183119, 15760467, 16141072, 16141073	GO:0006118: electron transport, GO:0006810: transport, GO:0005783: endoplasmic reticulum, GO:0005792: microsome, GO:0016020: membrane, GO:0016021: integral to membrane, GO:0031227: intrinsic to endoplasmic reticulum membrane, GO:0004497: monooxygenase activity, GO:0004499: dimethylaniline monooxygenase (N-oxide-forming) activity, GO:0005215: transporter activity, GO:0015036: disulfide oxidoreduct…		gb:BC011229.1 /DB_XREF=gi:15029983 /FEA=FLmRNA /CNT=109 /TID=Mm.976.1 /TIER=FL+Stack /STK=45 /UG=Mm.976 /LL=14261 /UG_GENE=Fmo1 /DEF=Mus musculus, Similar to flavin containing monooxygenase 1, clone MGC:18391 IMAGE:4196446, mRNA, complete cds. /PROD=Similar to flavin containing monooxygenase 1 /FL=gb:NM_010231.1 gb:D16215.1 gb:BC011229.1 gb:U87456.1
1459990_at	control	13.8177	1.3382	PPP-PAP	332.13	6.7471	248.2	8.0728	339.8	329.5	327.1	238.9	252.3	253.4	Ddr1	discoidin domain receptor family, member 1	17	17 C	-35289619	BF462661	12305	1281307, 7558021, 7774938, 8127887, 8302582, 8397369, 8530024, 8622863, 8889548, 10349636, 10970885, 11042159, 11076861, 11114734, 11217851, 11254672, 11283268, 12065315, 12397034, 12466851, 12477932, 15200417, 15226823, 15782199, 16141072, 16141073, 16167341, 16603319, 16783635, 17113033	GO:0006468: protein amino acid phosphorylation, GO:0007155: cell adhesion, GO:0007169: transmembrane receptor protein tyrosine kinase signaling pathway, GO:0005615: extracellular space, GO:0016020: membrane, GO:0016021: integral to membrane, GO:0000166: nucleotide binding, GO:0004672: protein kinase activity, GO:0004674: protein serine/threonine kinase activity, GO:0004713: protein-tyrosine kinas…		gb:BF462661 /DB_XREF=gi:11531844 /DB_XREF=UI-M-CG0p-bng-b-12-0-UI.s1 /CLONE=UI-M-CG0p-bng-b-12-0-UI /FEA=EST /CNT=19 /TID=Mm.5021.5 /TIER=Stack /STK=12 /UG=Mm.5021 /LL=12305 /UG_GENE=Ddr1 /UG_TITLE=discoidin domain receptor family, member 1
1437723_s_at	control	13.7456	2.1879	PPP-PPP	9380.37	393.688	4287.4	506.808	9452.5	9733	8955.6	3779	4290.6	4792.6	Derl1	Der1-like domain family, member 1	15	15 D2	-57699584	BB417749	67819	10349636, 10922068, 11042159, 11076861, 11217851, 12466851, 12477932, 15215855, 15782199, 16055502, 16141072, 16141073	GO:0006810: transport, GO:0006986: response to unfolded protein, GO:0015031: protein transport, GO:0019060: intracellular transport of viral proteins in host cell, GO:0030433: ER-associated protein catabolic process, GO:0030968: unfolded protein response, GO:0030970: retrograde protein transport, ER to cytosol, GO:0005783: endoplasmic reticulum, GO:0005783: endoplasmic reticulum, GO:0016020: memb…		gb:BB417749 /DB_XREF=gi:9239104 /DB_XREF=BB417749 /CLONE=C530005B07 /FEA=EST /CNT=15 /TID=Mm.203950.2 /TIER=Stack /STK=15 /UG=Mm.203950 /LL=105788 /UG_GENE=AI195141 /UG_TITLE=expressed sequence AI195141
1451939_a_at	control	13.737	7.101	PPP-PPA	466.53	46.2629	65.7	20.3472	436.4	443.4	519.8	72.6	81.7	42.8	Srpx	sushi-repeat-containing protein	X	X A1.2	-9194935	AB028050	51795	10349636, 11042159, 11076861, 11217851, 12049817, 12466851, 12477932, 16141072, 16141073	GO:0008150: biological_process, GO:0005615: extracellular space, GO:0003674: molecular_function		gb:AB028050.1 /DB_XREF=gi:6475036 /GEN=drs-2 /FEA=FLmRNA /CNT=1 /TID=Mm.1927.2 /TIER=FL /STK=1 /UG=Mm.1927 /LL=51795 /DEF=Mus musculus drs-2 mRNA for sushi-repeat-containing protein, complete cds. /PROD=sushi-repeat-containing protein /FL=gb:AB028050.1
1423201_at	control	13.6527	2.0053	PPP-PPP	7186.7	433.873	3583.87	143.773	7494.1	6690.4	7375.6	3705.5	3425.2	3620.9	Ncor1	nuclear receptor co-repressor 1	11	11 B2	-62132884	U22016	20185	7566114, 7760852, 8889548, 8961273, 9139821, 9702189, 9774688, 10049357, 10349636, 10753524, 10803578, 10922068, 11030619, 11042159, 11076861, 11217851, 11702949, 11891224, 11903058, 11997503, 12150997, 12410313, 12465718, 12466851, 12477932, 14744261, 15175761, 15226823, 15328020, 15371360, 15681609, 15695367, 15782199, 15840001, 15852015, 15870285, 16030140, 16141072, 16141073, 16216492, 162276…	GO:0006350: transcription, GO:0006355: regulation of transcription, DNA-dependent, GO:0016481: negative regulation of transcription, GO:0016568: chromatin modification, GO:0045449: regulation of transcription, GO:0045892: negative regulation of transcription, DNA-dependent, GO:0005634: nucleus, GO:0005634: nucleus, GO:0003677: DNA binding, GO:0003677: DNA binding, GO:0004872: receptor activity, G…	05040: Huntington's disease	gb:AW555798 /DB_XREF=gi:7201221 /DB_XREF=L0259F09-3 /CLONE=L0259F09 /FEA=FLmRNA /CNT=223 /TID=Mm.88061.1 /TIER=Stack /STK=20 /UG=Mm.88061 /LL=20185 /UG_GENE=Ncor1 /UG_TITLE=nuclear receptor co-repressor 1 /FL=gb:NM_011308.1 gb:U35312.1
1428156_at	control	13.6304	3.8602	PPP-PPP	493.2	39.4181	127.77	24.5474	528.2	500.9	450.5	154.9	107.1	121.3	Gng2	guanine nucleotide binding protein (G protein), gamma 2 subunit	14	14 A2	-18663255	AV021455	14702	1385432, 1549114, 2122451, 2499046, 6438626, 8094261, 8858601, 8889548, 10191100, 10349636, 10833460, 11042159, 11076861, 11217851, 11685543, 12466851, 12477932, 14712229, 15761153, 16141072, 16141073, 16632597	GO:0007165: signal transduction, GO:0007186: G-protein coupled receptor protein signaling pathway, GO:0007186: G-protein coupled receptor protein signaling pathway, GO:0008283: cell proliferation, GO:0005834: heterotrimeric G-protein complex, GO:0005834: heterotrimeric G-protein complex, GO:0016020: membrane, GO:0003924: GTPase activity, GO:0004871: signal transducer activity		gb:AK003394.1 /DB_XREF=gi:12834036 /FEA=mRNA /CNT=110 /TID=Mm.41737.1 /TIER=Stack /STK=89 /UG=Mm.41737 /LL=76292 /UG_GENE=1110003P13Rik /UG_TITLE=RIKEN cDNA 1110003P13 gene /DEF=Mus musculus 18 days embryo whole body cDNA, RIKEN full-length enriched library, clone:1110003P13:unclassifiable transcript, full insert sequence.
1448943_at	control	13.6266	7.2173	PPP-PPP	6021.13	636.349	834.27	172.41	5738.8	6749.8	5574.8	963.9	900.3	638.6	Nrp1	neuropilin 1	8	8 E	131245329	AK011144	18186	8575331, 8748368, 9288753, 9331348, 9390514, 9742149, 9753685, 9811588, 10229225, 10328887, 10349636, 10409677, 10518505, 10675351, 10705382, 10707970, 10725340, 11025205, 11027230, 11042159, 11076861, 11084652, 11160433, 11165481, 11217851, 11231073, 11238106, 11442635, 11461151, 11688557, 11756651, 11786422, 11804779, 11830568, 11891274, 11906695, 11939589, 12036513, 12093729, 12118260, 1236197…	GO:0001525: angiogenesis, GO:0007155: cell adhesion, GO:0007275: multicellular organismal development, GO:0007399: nervous system development, GO:0007411: axon guidance, GO:0007507: heart development, GO:0016358: dendrite development, GO:0016477: cell migration, GO:0030154: cell differentiation, GO:0030517: negative regulation of axon extension, GO:0048010: vascular endothelial growth factor rece…	04360: Axon guidance	gb:AK002673.1 /DB_XREF=gi:12832830 /FEA=FLmRNA /CNT=224 /TID=Mm.27448.1 /TIER=Stack /STK=21 /UG=Mm.27448 /LL=18186 /UG_GENE=Nrp /UG_TITLE=neuropilin /DEF=Mus musculus adult male kidney cDNA, RIKEN full-length enriched library, clone:0610025N19:neuropilin, full insert sequence. /FL=gb:D50086.1 gb:NM_008737.1
1437416_at	control	13.6191	67.5322	PPP-AAA	1361.9	170.553	20.17	5.428	1167.3	1485.4	1433	23.2	23.4	13.9	BC034902	cDNA sequence BC034902	2	2 F3		BE199876	228642	10349636, 11042159, 11076861, 11217851, 12466851, 12477932, 16141072, 16141073			gb:BE199876 /DB_XREF=gi:8712045 /DB_XREF=ug71g02.x1 /CLONE=IMAGE:1547858 /FEA=EST /CNT=21 /TID=Mm.123411.1 /TIER=Stack /STK=18 /UG=Mm.123411 /UG_TITLE=ESTs
1437784_at	control	13.5642	2.96	PPP-PAP	209.77	12.1517	70.87	12.9199	214.3	219	196	56.7	73.9	82	Runx1t1	runt-related transcription factor 1; translocated to, 1 (cyclin D-related)	4	1899-12-31 04:00:00	13711928	AW550878	12395	8137293, 8575770, 10022820, 10349636, 10922068, 11042159, 11044609, 11076861, 11217851, 11265752, 11463846, 12086889, 12417632, 12466851, 15509789, 15569932, 16141072, 16141073, 16227606, 16325481, 16516881, 16964442	GO:0006350: transcription, GO:0006355: regulation of transcription, DNA-dependent, GO:0045444: fat cell differentiation, GO:0051101: regulation of DNA binding, GO:0005634: nucleus, GO:0003677: DNA binding, GO:0003700: transcription factor activity, GO:0005515: protein binding, GO:0008270: zinc ion binding, GO:0016564: transcriptional repressor activity, GO:0042803: protein homodimerization activi…		gb:AW550878 /DB_XREF=gi:7196306 /DB_XREF=L0070E11-3 /CLONE=L0070E11 /FEA=EST /CNT=21 /TID=Mm.133407.1 /TIER=Stack /STK=14 /UG=Mm.133407 /UG_TITLE=ESTs
1436173_at	control	13.5588	21.43	PPP-APA	3360.93	406.567	156.83	47.2392	3830.1	3111.9	3140.8	187.1	181	102.4	Dlc1	deleted in liver cancer 1	8	8 A4-B2	-38036262	BB768194	50768	8889548, 10349636, 10702663, 11042159, 11076861, 11217851, 12034501, 12466851, 12477932, 15710412, 16141072, 16141073	GO:0007010: cytoskeleton organization and biogenesis, GO:0007165: signal transduction, GO:0007266: Rho protein signal transduction, GO:0030155: regulation of cell adhesion, GO:0030308: negative regulation of cell growth, GO:0005622: intracellular, GO:0005634: nucleus, GO:0005737: cytoplasm, GO:0003677: DNA binding, GO:0005096: GTPase activator activity, GO:0005100: Rho GTPase activator activity, …		gb:BQ175628 /DB_XREF=gi:20351120 /DB_XREF=UI-M-DJ2-bvx-o-22-0-UI.s1 /CLONE=UI-M-DJ2-bvx-o-22-0-UI /FEA=EST /CNT=46 /TID=Mm.89698.1 /TIER=Stack /STK=10 /UG=Mm.89698 /UG_TITLE=ESTs
1455747_at	control	13.5577	31.4364	PPP-AAA	172.9	21.3157	5.5	1.7321	184.5	185.9	148.3	4.5	7.5	4.5	Ggtla1	gamma-glutamyltransferase-like activity 1	10	10 C1	75033096	BB010646	23887	9774450, 10349636, 10667344, 11042159, 11076861, 11217851, 11463821, 12163373, 12466851, 12477932, 16141072, 16141073	GO:0006750: glutathione biosynthetic process, GO:0006954: inflammatory response, GO:0019370: leukotriene biosynthetic process, GO:0005886: plasma membrane, GO:0016020: membrane, GO:0016021: integral to membrane, GO:0003840: gamma-glutamyltransferase activity, GO:0003840: gamma-glutamyltransferase activity, GO:0008415: acyltransferase activity, GO:0016740: transferase activity	00430: Taurine and hypotaurine metabolism, 00450: Selenoamino acid metabolism, 00460: Cyanoamino acid metabolism, 00480: Glutathione metabolism, 00590: Arachidonic acid metabolism	gb:BB010646 /DB_XREF=gi:15403265 /DB_XREF=BB010646 /CLONE=4732496L20 /FEA=EST /CNT=12 /TID=Mm.18263.2 /TIER=Stack /STK=8 /UG=Mm.18263 /LL=23887 /UG_GENE=Ggtla1 /UG_TITLE=gamma-glutamyltransferase-like activity 1
1436337_at	control	13.4926	2.7211	PPP-PPP	659.97	21.1623	242.53	49.2305	638.4	680.7	660.8	224.2	298.3	205.1	E030031F02Rik	RIKEN cDNA E030031F02 gene	5	5 A1		BF453911	319689	8889548, 10349636, 11042159, 11076861, 11217851, 12466851, 15226823, 16141072, 16141073			gb:BF453911 /DB_XREF=gi:11520080 /DB_XREF=maa60d03.x1 /CLONE=IMAGE:3821213 /FEA=EST /CNT=27 /TID=Mm.22480.2 /TIER=Stack /STK=9 /UG=Mm.22480 /LL=23857 /UG_GENE=Dmtf1 /UG_TITLE=cyclin D binding myb-like transcription factor 1
1421298_a_at	control	13.4922	2.695	AAA-PAA	126.93	8.405	47.1	5.8643	126.6	135.5	118.7	53.4	46.1	41.8	Hipk1	homeodomain interacting protein kinase 1	3	3 F3	-103872733	NM_010432	15257	8889548, 9748262, 10349636, 10694743, 10922068, 11034606, 11042159, 11076861, 11125038, 11217851, 12466851, 12529400, 12693553, 12702766, 16141072, 16141073, 16537918, 16917507	GO:0000122: negative regulation of transcription from RNA polymerase II promoter, GO:0006350: transcription, GO:0006355: regulation of transcription, DNA-dependent, GO:0006468: protein amino acid phosphorylation, GO:0007224: smoothened signaling pathway, GO:0008284: positive regulation of cell proliferation, GO:0009952: anterior/posterior pattern formation, GO:0042771: DNA damage response, signal…		gb:NM_010432.1 /DB_XREF=gi:6754195 /GEN=Hipk1 /FEA=FLmRNA /CNT=12 /TID=Mm.20827.1 /TIER=FL /STK=2 /UG=Mm.20827 /LL=15257 /DEF=Mus musculus homeodomain interacting protein kinase 1 (Hipk1), mRNA. /PROD=homeodomain interacting protein kinase 1 /FL=gb:AF077658.1 gb:AF170304.1 gb:NM_010432.1
1448688_at	control	13.4889	3.9597	PPP-PPP	1094.87	83.7007	276.5	63.534	1157.9	1126.8	999.9	348.2	254.1	227.2	Podxl	podocalyxin-like	6	6 A3.3	-31449657	AF290209	27205	8889548, 10349636, 10591182, 10922068, 11042159, 11076861, 11217851, 11387227, 11435469, 11913788, 12204248, 12466851, 12477932, 15010206, 15661640, 15701716, 16049112, 16141072, 16141073, 16319116, 16498405, 16942767, 16973757	GO:0006468: protein amino acid phosphorylation, GO:0050900: leukocyte migration, GO:0005886: plasma membrane, GO:0016020: membrane, GO:0016021: integral to membrane, GO:0004672: protein kinase activity, GO:0005524: ATP binding		gb:AF290209.1 /DB_XREF=gi:9937466 /GEN=Podxl /FEA=FLmRNA /CNT=112 /TID=Mm.89918.1 /TIER=FL+Stack /STK=46 /UG=Mm.89918 /LL=27205 /DEF=Mus musculus podocalyxin (Podxl) mRNA, complete cds. /PROD=podocalyxin /FL=gb:AB028048.1 gb:AF290209.1 gb:NM_013723.1
1451428_x_at	control	13.4565	3.8692	PPP-PPP	855.73	53.2357	221.17	61.9459	797.5	901.9	867.8	262.1	251.5	149.9	Egfl7	EGF-like domain 7	2	2 B	26403091, 26405877, 26405888	BC024610	353156	10349636, 11042159, 11076861, 11217851, 12466851, 12477932, 14592969, 15085134, 15162510, 15226823, 15972971, 16141072, 16141073, 16169248	GO:0001525: angiogenesis, GO:0001568: blood vessel development, GO:0001570: vasculogenesis, GO:0007275: multicellular organismal development, GO:0030154: cell differentiation, GO:0030336: negative regulation of cell migration, GO:0005576: extracellular region, GO:0005615: extracellular space, GO:0003674: molecular_function, GO:0005509: calcium ion binding		gb:BC024610.1 /DB_XREF=gi:19354311 /FEA=FLmRNA /CNT=39 /TID=Mm.46628.2 /TIER=FL+Stack /STK=21 /UG=Mm.46628 /LL=22344 /UG_GENE=Vezf1 /DEF=Mus musculus, vascular endothelial zinc finger 1, clone MGC:28455 IMAGE:4159675, mRNA, complete cds. /PROD=vascular endothelial zinc finger 1 /FL=gb:BC024610.1
1432273_a_at	control	13.4556	6.0339	PPP-AAP	635.17	56.75	105.27	37.8434	695.2	582.4	627.9	64.4	139.1	112.3	Darc	Duffy blood group, chemokine receptor	1	1 H3	-175168485	AK010883	13349	9314499, 10051400, 10349636, 10520743, 10757794, 10961863, 11042159, 11076861, 11132158, 11217851, 11444905, 11781390, 11929753, 12466851, 12477932, 12646177, 12697152, 12734373, 15226823, 15278442, 15597075, 16026622, 16386320, 16394268	GO:0006954: inflammatory response, GO:0007165: signal transduction, GO:0007186: G-protein coupled receptor protein signaling pathway, GO:0016020: membrane, GO:0016021: integral to membrane, GO:0001584: rhodopsin-like receptor activity, GO:0004871: signal transducer activity, GO:0004872: receptor activity, GO:0004930: G-protein coupled receptor activity		gb:AK010883.1 /DB_XREF=gi:12846633 /FEA=mRNA /CNT=1 /TID=Mm.6393.3 /TIER=ConsEnd /STK=0 /UG=Mm.6393 /LL=13349 /UG_GENE=Dfy /UG_TITLE=Duffy blood group /DEF=Mus musculus 13 days embryo liver cDNA, RIKEN full-length enriched library, clone:2510001J03:Duffy blood group, full insert sequence.
1435465_at	control	13.4097	11.7172	PPP-PPA	1535.73	178.343	131.07	33.3404	1602.7	1333.6	1670.9	133.9	162.9	96.4	Kbtbd11	kelch repeat and BTB (POZ) domain containing 11	8	8 A2		AW049906	74901	10349636, 11042159, 11076861, 11217851, 11812828, 12466851, 12477932, 14621295, 15226823, 16141072, 16141073	GO:0005515: protein binding		gb:AW049906 /DB_XREF=gi:5910435 /DB_XREF=UI-M-BH1-ami-b-10-0-UI.s1 /CLONE=UI-M-BH1-ami-b-10-0-UI /FEA=EST /CNT=29 /TID=Mm.46675.1 /TIER=Stack /STK=16 /UG=Mm.46675 /UG_TITLE=ESTs
1419871_at	control	13.3575	3.8443	PPP-PPA	256.03	10.055	66.6	22.4114	265.9	256.4	245.8	90.4	63.5	45.9	Ppp2r1b	protein phosphatase 2 (formerly 2A), regulatory subunit A (PR 65), beta isoform	9	9 A5.3	50609164	AI505185	73699	8889548, 10349636, 10922068, 11042159, 11076861, 11217851, 12466851, 12477932, 16141072, 16141073	GO:0005488: binding	04310: Wnt signaling pathway, 04530: Tight junction, 04730: Long-term depression	gb:AI505185 /DB_XREF=gi:4403036 /DB_XREF=vp93c05.x1 /CLONE=IMAGE:1092296 /FEA=EST /CNT=1 /TID=Mm.38316.2 /TIER=ConsEnd /STK=0 /UG=Mm.38316 /UG_TITLE=ESTs, Moderately similar to KIAA0781 protein (H.sapiens)
1421571_a_at	control	13.3423	6.0942	PPP-PPP	7449	324.671	1222.3	740.26	7326.5	7203.4	7817.1	1955.1	1237	474.8	Ly6c	lymphocyte antigen 6 complex, locus C	15	15 D3	-74872271	NM_010741	17067	2164472, 3335781, 3356904, 7520861, 8806622, 10349636, 11042159, 11076861, 11217851, 12184918, 12466851, 12477932, 12538687, 14609575, 15034057, 15616565, 16141072, 16141073, 17084826	GO:0006952: defense response, GO:0005615: extracellular space, GO:0009897: external side of plasma membrane, GO:0016020: membrane, GO:0048503: GPI anchor binding		gb:NM_010741.1 /DB_XREF=gi:6754581 /GEN=Ly6c /FEA=FLmRNA /CNT=4 /TID=Mm.1583.1 /TIER=FL /STK=2 /UG=Mm.1583 /LL=17067 /DEF=Mus musculus lymphocyte antigen 6 complex, locus C (Ly6c), mRNA. /PROD=lymphocyte antigen 6 complex, locus C /FL=gb:NM_010741.1 gb:D86232.1
1418059_at	control	13.336	9.119	PPP-PPP	1468.77	151.584	161.07	76.6043	1354.8	1410.7	1640.8	237.2	162	84	Eltd1	EGF, latrophilin seven transmembrane domain containing 1	3	3 H3-H4	151375272	BC017134	170757	11050079, 11217851, 11438738, 12466851, 12477932, 14647991, 15203201	GO:0007165: signal transduction, GO:0007186: G-protein coupled receptor protein signaling pathway, GO:0007218: neuropeptide signaling pathway, GO:0005615: extracellular space, GO:0016020: membrane, GO:0016021: integral to membrane, GO:0004871: signal transducer activity, GO:0004872: receptor activity, GO:0004930: G-protein coupled receptor activity, GO:0005509: calcium ion binding		gb:BC017134.1 /DB_XREF=gi:16877797 /FEA=FLmRNA /CNT=65 /TID=Mm.27242.1 /TIER=FL /STK=4 /UG=Mm.27242 /LL=170757 /UG_GENE=ETL1 /DEF=Mus musculus, clone MGC:27649 IMAGE:4511572, mRNA, complete cds. /PROD=Unknown (protein for MGC:27649) /FL=gb:BC017134.1 gb:AF385682.1 gb:NM_133222.1
1440303_at	control	13.2905	2.5377	PPP-PAA	147.1	11.2787	57.97	2.7791	142.2	160	139.1	57	55.8	61.1	Slc7a6os	solute carrier family 7, member 6 opposite strand	8	8 D3	-109089842	AV256717	66432	10349636, 11042159, 11076861, 11217851, 12466851, 12477932, 15537664, 16141072, 16141073			gb:AV256717 /DB_XREF=gi:15405338 /DB_XREF=AV256717 /CLONE=4921530K24 /FEA=EST /CNT=7 /TID=Mm.129639.1 /TIER=ConsEnd /STK=5 /UG=Mm.129639 /UG_TITLE=ESTs
1458351_s_at	control	13.283	4.8567	PPP-PPP	663.27	33.8757	136.57	59.7438	659.9	698.7	631.2	204.9	110.6	94.2	Klhl2	kelch-like 2, Mayven (Drosophila)	8	8 B3.1	-67632054	BB428573	77113	8889548, 10349636, 10397770, 10725249, 10922068, 11042159, 11076861, 11217851, 12466851, 12477932, 12652657, 15782199, 16141072, 16141073	GO:0001725: stress fiber, GO:0005856: cytoskeleton, GO:0003779: actin binding, GO:0003779: actin binding, GO:0005515: protein binding, GO:0042803: protein homodimerization activity		gb:BB428573 /DB_XREF=gi:9268300 /DB_XREF=BB428573 /CLONE=C630019F22 /FEA=EST /CNT=3 /TID=Mm.128906.1 /TIER=ConsEnd /STK=3 /UG=Mm.128906 /UG_TITLE=ESTs
1448123_s_at	control	13.1704	5.8709	PPP-PPP	2356.77	247.535	401.43	69.655	2083	2422.5	2564.8	407.6	467.8	328.9	Tgfbi	transforming growth factor, beta induced	13	13 38.0 cM	56619230	NM_009369	21810	8024701, 10349636, 10913330, 10922068, 11042159, 11076861, 11217851, 11353389, 11598925, 12466851, 12704192, 12838408, 12963107, 14531791, 14967934, 15328023, 15604097, 15780949, 15907457, 16141072, 16141073, 16537572	GO:0007155: cell adhesion, GO:0005578: extracellular matrix (sensu Metazoa), GO:0005615: extracellular space, GO:0005615: extracellular space, GO:0005515: protein binding		gb:NM_009369.1 /DB_XREF=gi:6678320 /GEN=Tgfbi /FEA=FLmRNA /CNT=272 /TID=Mm.14455.1 /TIER=FL+Stack /STK=191 /UG=Mm.14455 /LL=21810 /DEF=Mus musculus transforming growth factor, beta induced, 68 kDa (Tgfbi), mRNA. /PROD=transforming growth factor, beta induced, 68kDa /FL=gb:L19932.1 gb:NM_009369.1
1437559_at	control	13.169	16.1968	PPP-AAP	433.53	51.3959	26.77	14.8561	374.2	464.3	462.1	39.4	10.4	30.5	Rgs7bp	regulator of G-protein signalling 7 binding protein	13	13 D1	-106067536	BB130891	52882	8889548, 9371744, 10349636, 11042159, 11076861, 11217851, 12466851, 12477932, 15632198, 15897264, 16046666, 16141072, 16141073, 16574655			gb:BB130891 /DB_XREF=gi:15408374 /DB_XREF=BB130891 /CLONE=9630047M24 /FEA=EST /CNT=21 /TID=Mm.100348.2 /TIER=Stack /STK=16 /UG=Mm.100348 /LL=52882 /UG_GENE=D13Bwg1146e /UG_TITLE=DNA segment, Chr 13, Brigham & Womens Genetics 1146 expressed
1422470_at	control	13.1655	14.1517	PPP-PPP	14536.7	1765.32	1027.2	206.058	13976.9	16514	13119.1	928.9	1264	888.7	Bnip3	BCL2/adenovirus E1B interacting protein 1, NIP3	7	7 F5	-138729178	NM_009760	12176	7954800, 9867803, 9916985, 10349636, 10725249, 10891486, 10922068, 11042159, 11044609, 11076861, 11217851, 11832486, 12466851, 12477932, 12819136, 14651853, 15358175, 15979417, 16141072, 16141073, 16166637, 16874059, 16954213	GO:0001666: response to hypoxia, GO:0006309: DNA fragmentation during apoptosis, GO:0006338: chromatin remodeling, GO:0006800: oxygen and reactive oxygen species metabolic process, GO:0006915: apoptosis, GO:0006915: apoptosis, GO:0006916: anti-apoptosis, GO:0006917: induction of apoptosis, GO:0008219: cell death, GO:0008634: negative regulation of survival gene product activity, GO:0042981: regul…		gb:NM_009760.1 /DB_XREF=gi:6753197 /GEN=Bnip3 /FEA=FLmRNA /CNT=197 /TID=Mm.2159.1 /TIER=FL+Stack /STK=80 /UG=Mm.2159 /LL=12176 /DEF=Mus musculus BCL2adenovirus E1B 19 kDa-interacting protein 1, NIP3 (Bnip3), mRNA. /PROD=BCL2adenovirus E1B 19 kDa-interacting protein1, NIP3 /FL=gb:AF041054.1 gb:NM_009760.1
1448104_at	control	13.1087	2.5562	PPP-PPP	9018.53	551.125	3528.13	471.733	8398.6	9453	9204	3120.6	3418.9	4044.9	Aldh6a1	aldehyde dehydrogenase family 6, subfamily A1	12	12 D1	-85320466	NM_134042	104776	10349636, 11042159, 11076861, 11217851, 12466851, 12477932, 14651853, 15782199, 16141072, 16141073	GO:0006573: valine metabolic process, GO:0008152: metabolic process, GO:0005739: mitochondrion, GO:0005739: mitochondrion, GO:0004491: methylmalonate-semialdehyde dehydrogenase (acylating) activity, GO:0016491: oxidoreductase activity	00031: Inositol metabolism, 00280: Valine, leucine and isoleucine degradation, 00640: Propanoate metabolism	gb:NM_134042.1 /DB_XREF=gi:19527257 /GEN=1110038I05Rik /FEA=FLmRNA /CNT=367 /TID=Mm.182707.1 /TIER=FL+Stack /STK=229 /UG=Mm.182707 /LL=104776 /DEF=Mus musculus RIKEN cDNA 1110038I05 gene (1110038I05Rik), mRNA. /PROD=RIKEN cDNA 1110038I05 /FL=gb:NM_134042.1 gb:AF297860.1
1458746_at	control	13.0123	7.7499	PPP-AAA	533.97	58.3831	68.9	20.5808	469.3	582.8	549.8	45.6	84.6	76.5	A430107O13Rik	RIKEN cDNA A430107O13 gene	6	6 A3.1	21935910	BB223800	214642	10349636, 11042159, 11076861, 11217851, 12466851, 16141072, 16141073			gb:BB223800 /DB_XREF=gi:16353823 /DB_XREF=BB223800 /CLONE=A530083M10 /FEA=EST /CNT=3 /TID=Mm.208071.1 /TIER=ConsEnd /STK=2 /UG=Mm.208071 /UG_TITLE=ESTs
1424008_a_at	control	12.9772	10.9764	PPP-PPP	1488.77	177.202	135.63	34.8724	1587.2	1594.9	1284.2	121.8	109.8	175.3	Rbpms2	RNA binding protein with multiple splicing 2	9	9 C	65428587	BC021788	71973	10349636, 10922068, 11042159, 11076861, 11217851, 12466851, 12477932, 16033648, 16141072, 16141073	GO:0000166: nucleotide binding, GO:0003676: nucleic acid binding, GO:0003676: nucleic acid binding		gb:BC021788.1 /DB_XREF=gi:18255712 /FEA=FLmRNA /CNT=97 /TID=Mm.29148.1 /TIER=FL+Stack /STK=65 /UG=Mm.29148 /LL=71973 /UG_GENE=2400008B06Rik /DEF=Mus musculus, clone MGC:28665 IMAGE:4236661, mRNA, complete cds. /PROD=Unknown (protein for MGC:28665) /FL=gb:BC021788.1
1416301_a_at	control	12.9338	29.225	PPP-PPP	3727.17	479.679	127.53	47.7657	3177.8	4063	3940.7	181.3	111.3	90	Ebf1	early B-cell factor 1	11	11 B1.1	44461556	BB125261	13591	7542362, 8012110, 8227050, 8491377, 8756438, 8876243, 9070927, 9105679, 9151732, 9389446, 9630743, 9858563, 10349636, 10435576, 10556054, 10704382, 10762365, 10842061, 10942392, 11042159, 11044609, 11060228, 11076752, 11076861, 11163266, 11217851, 11493561, 11498051, 11725301, 11869689, 11934853, 12062038, 12077253, 12118260, 12139918, 12391167, 12406913, 12411960, 12421703, 12466851, 12917357, 1…	GO:0006350: transcription, GO:0006355: regulation of transcription, DNA-dependent, GO:0007275: multicellular organismal development, GO:0045449: regulation of transcription, GO:0045941: positive regulation of transcription, GO:0005634: nucleus, GO:0003677: DNA binding, GO:0003700: transcription factor activity, GO:0005515: protein binding, GO:0005515: protein binding, GO:0008270: zinc ion binding…		gb:NM_007897.1 /DB_XREF=gi:6681252 /GEN=Ebf /FEA=FLmRNA /CNT=236 /TID=Mm.4366.1 /TIER=FL+Stack /STK=100 /UG=Mm.4366 /LL=13591 /DEF=Mus musculus early B-cell factor (Ebf), mRNA. /PROD=early B-cell factor /FL=gb:NM_007897.1 gb:L12147.1
1454884_at	control	12.9113	3.6602	PPP-AAA	404.33	29.8413	110.47	25.7605	395.1	380.2	437.7	139.6	101.1	90.7	Btbd4	BTB (POZ) domain containing 4	2	2 H4	-181339956	BG073185	72147	10349636, 10922068, 11042159, 11076861, 11217851, 12466851, 12477932, 16141072, 16141073	GO:0006350: transcription, GO:0006355: regulation of transcription, DNA-dependent, GO:0008150: biological_process, GO:0005575: cellular_component, GO:0005622: intracellular, GO:0005634: nucleus, GO:0003674: molecular_function, GO:0003676: nucleic acid binding, GO:0005515: protein binding, GO:0008270: zinc ion binding, GO:0046872: metal ion binding		gb:BG073185 /DB_XREF=gi:12555754 /DB_XREF=H3119G02-3 /CLONE=H3119G02 /FEA=EST /CNT=43 /TID=Mm.56581.3 /TIER=Stack /STK=38 /UG=Mm.56581 /LL=72147 /UG_GENE=2610019F01Rik /UG_TITLE=RIKEN cDNA 2610019F01 gene
1421378_s_at	control	12.9009	3.6378	PPP-AAA	296.97	17.4489	81.63	23.0509	278.2	312.7	300	104.8	81.4	58.7	Abcc1	ATP-binding cassette, sub-family C (CFTR/MRP), member 1	16	16 A1	14275137	NM_008576	17250	7671247, 7842732, 8649356, 8885844, 8889548, 8968083, 8973633, 9359705, 9393741, 9730882, 9778357, 10349636, 10413292, 10581366, 10581368, 10675353, 10708515, 10922068, 10944550, 11042159, 11076861, 11114332, 11208926, 11217851, 11245453, 11278867, 11409873, 11689020, 11855834, 12296850, 12466851, 12466855, 12477932, 12504668, 12516967, 12951053, 14742140, 15328029, 15749056, 15802388, 15886284, …	GO:0006810: transport, GO:0005887: integral to plasma membrane, GO:0016020: membrane, GO:0016021: integral to membrane, GO:0000166: nucleotide binding, GO:0005215: transporter activity, GO:0005524: ATP binding, GO:0016887: ATPase activity, GO:0017111: nucleoside-triphosphatase activity, GO:0042626: ATPase activity, coupled to transmembrane movement of substances	02010: ABC transporters - General	gb:NM_008576.1 /DB_XREF=gi:6678847 /GEN=Abcc1a /FEA=FLmRNA /CNT=15 /TID=Mm.89956.1 /TIER=FL /STK=2 /UG=Mm.89956 /LL=17250 /DEF=Mus musculus ATP-binding cassette, sub-family C (CFTRMRP), member 1a (Abcc1a), mRNA. /PROD=ATP-binding cassette, sub-family C, member 1a /FL=gb:AF022908.1 gb:NM_008576.1
1429206_at	control	12.8335	5.0357	PPP-PPP	715.4	63.382	142.07	44.387	661	785	700.2	193.3	115.2	117.7	Rhobtb1	Rho-related BTB domain containing 1	10	10 B5.1	68608013	AK014194	69288	8889548, 10349636, 11042159, 11076861, 11217851, 12426103, 12466851, 12477932, 15368895, 15761153, 16141072, 16141073	GO:0007264: small GTPase mediated signal transduction, GO:0005622: intracellular, GO:0016020: membrane, GO:0000166: nucleotide binding, GO:0005515: protein binding, GO:0005525: GTP binding		gb:AK014194.1 /DB_XREF=gi:12851894 /FEA=mRNA /CNT=19 /TID=Mm.26659.1 /TIER=Stack /STK=9 /UG=Mm.26659 /LL=73196 /UG_GENE=3110048G13Rik /UG_TITLE=RIKEN cDNA 3110048G13 gene /DEF=Mus musculus 13 days embryo head cDNA, RIKEN full-length enriched library, clone:3110048G13:unclassifiable transcript, full insert sequence.
1424308_at	control	12.7757	12.4777	PPP-PMP	2354.53	293.037	188.7	18.654	2084.6	2666.2	2312.8	196	202.6	167.5	Slc24a3	solute carrier family 24 (sodium/potassium/calcium exchanger), member 3	2	2 H1	144934051	BC017615	94249	8889548, 11294880, 12466851, 12477932	GO:0006810: transport, GO:0006811: ion transport, GO:0006813: potassium ion transport, GO:0006814: sodium ion transport, GO:0006816: calcium ion transport, GO:0006874: calcium ion homeostasis, GO:0005886: plasma membrane, GO:0016020: membrane, GO:0016021: integral to membrane, GO:0005509: calcium ion binding, GO:0008273: calcium, potassium:sodium antiporter activity, GO:0008273: calcium, potassiu…		gb:BC017615.1 /DB_XREF=gi:17160891 /FEA=FLmRNA /CNT=95 /TID=Mm.86818.1 /TIER=FL+Stack /STK=38 /UG=Mm.86818 /LL=94249 /UG_GENE=Slc24a3 /DEF=Mus musculus, Similar to solute carrier family 24 (sodiumpotassiumcalcium exchanger), member 3, clone MGC:27686 IMAGE:4914291, mRNA, complete cds. /PROD=Similar to solute carrier family 24(sodiumpotassiumcalcium exchanger), member 3 /FL=gb:BC017615.1
1437364_at	control	12.7736	4.185	PPP-AAA	197.53	19.0579	47.2	7.2339	178.8	216.9	196.9	39.3	48.8	53.5	Coq3	coenzyme Q3 homolog, methyltransferase (yeast)	4	4 A3	21970509	BB108855	230027	8053692, 8678992, 8827514, 9077551, 10349636, 10725249, 10922068, 11042159, 11076861, 11217851, 12466851, 12477932, 12581641, 16141072, 16141073	GO:0006071: glycerol metabolic process, GO:0006744: ubiquinone biosynthetic process, GO:0005739: mitochondrion, GO:0004395: hexaprenyldihydroxybenzoate methyltransferase activity, GO:0008168: methyltransferase activity, GO:0008425: 2-polyprenyl-6-methoxy-1,4-benzoquinone methyltransferase activity, GO:0016740: transferase activity	00130: Ubiquinone biosynthesis	gb:BB108855 /DB_XREF=gi:16261608 /DB_XREF=BB108855 /CLONE=9530014K10 /FEA=EST /CNT=25 /TID=Mm.5662.2 /TIER=Stack /STK=19 /UG=Mm.5662 /LL=97143 /UG_GENE=C77934 /UG_TITLE=expressed sequence C77934
1457898_at	control	12.737	10.7304	PPP-PPA	464.27	51.6413	43.27	24.7128	498.8	404.9	489.1	66.9	45.3	17.6	Ga17	dendritic cell protein GA17	2	2 E2	-104800497	BM243944	98221	7671812, 8889548, 10349636, 10568747, 10725249, 10922068, 11042159, 11076861, 11217851, 11889558, 12466851, 12477932, 15782199, 16141072, 16141073			gb:BM243944 /DB_XREF=gi:17879214 /DB_XREF=K0704C08-3 /CLONE=K0704C08 /FEA=EST /CNT=4 /TID=Mm.185569.1 /TIER=ConsEnd /STK=3 /UG=Mm.185569 /UG_TITLE=ESTs
1428032_at	control	12.7057	3.5801	PPP-PPP	354.43	34.7293	99	2.5239	363.4	383.8	316.1	98.3	101.8	96.9	Acvr1c	activin A receptor, type IC	2	2 C1.1	-58087207	BC028780	269275	10349636, 11042159, 11076861, 11217851, 12466851, 12477932, 14729481, 15196700, 15342483, 15485907, 16141072, 16141073, 16564040, 16845371, 16953060	GO:0001701: embryonic development (sensu Mammalia), GO:0001834: trophectodermal cell proliferation, GO:0006468: protein amino acid phosphorylation, GO:0006468: protein amino acid phosphorylation, GO:0006915: apoptosis, GO:0007368: determination of left/right symmetry, GO:0030154: cell differentiation, GO:0042981: regulation of apoptosis, GO:0043065: positive regulation of apoptosis, GO:0009986: c…	04010: MAPK signaling pathway, 04350: TGF-beta signaling pathway, 04520: Adherens junction, 05210: Colorectal cancer, 05212: Pancreatic cancer, 05220: Chronic myeloid leukemia	gb:BC028780.1 /DB_XREF=gi:20380473 /FEA=mRNA /CNT=4 /TID=Mm.123481.1 /TIER=ConsEnd /STK=0 /UG=Mm.123481 /DEF=Mus musculus, clone IMAGE:1196242, mRNA, partial cds. /PROD=Unknown (protein for IMAGE:1196242)
1428333_at	control	12.7032	33.2251	PPP-PPP	13064.1	1723.47	393.2	120.182	12783.1	14910.8	11498.4	445.7	478.2	255.7	2900062L11Rik	RIKEN cDNA 2900062L11 gene	X	X F1	131340194	AK013740	76976	10349636, 11042159, 11076861, 11217851, 12466851, 12477932, 16141072, 16141073			gb:AK013740.1 /DB_XREF=gi:12851221 /FEA=mRNA /CNT=71 /TID=Mm.27579.1 /TIER=Stack /STK=52 /UG=Mm.27579 /LL=76976 /UG_GENE=2900062L11Rik /UG_TITLE=RIKEN cDNA 2900062L11 gene /DEF=Mus musculus adult male hippocampus cDNA, RIKEN full-length enriched library, clone:2900062L11:homolog to MICROSOMAL SIGNAL PEPTIDASE 23 KDA SUBUNIT (EC 3.4.-.-) (SPC2223), full insert sequence.
1455308_at	control	12.6719	2.4073	PPP-PPP	2155.67	135.893	895.47	105.845	1998.8	2230.7	2237.5	991.7	782.1	912.6	Tmem16f	transmembrane protein 16F	15	15 F1	95618876	BG074632	105722	8889548, 10349636, 10922068, 11042159, 11076861, 11125038, 11217851, 12466851, 12477932, 15067359, 16141072, 16141073	GO:0016020: membrane, GO:0016021: integral to membrane		gb:AV154014 /DB_XREF=gi:16383230 /DB_XREF=AV154014 /CLONE=2900059G15 /FEA=EST /CNT=122 /TID=Mm.38087.1 /TIER=Stack /STK=16 /UG=Mm.38087 /LL=106070 /UG_GENE=AW554778 /UG_TITLE=expressed sequence AW554778
1440506_at	control	12.6614	4.1722	PPP-PPP	432.8	44.7776	103.73	4.6231	479.7	390.5	428.2	103.2	99.4	108.6	Slc7a2	solute carrier family 7 (cationic amino acid transporter, y+ system), member 2	8	8 A4	42361183, 42361209	BB433596	11988	1387105, 1694015, 1887331, 7568136, 7724615, 7941361, 8195186, 8382989, 8385111, 8417372, 8474450, 8672127, 8878860, 8954799, 9287114, 9334265, 9560283, 10349636, 10922068, 11042159, 11076861, 11217851, 11278602, 11829538, 12466851, 12477932, 12675924, 15631944, 15659399, 16141072, 16141073, 16239143, 16371438, 16670299, 16703566, 17003120	GO:0005975: carbohydrate metabolic process, GO:0006810: transport, GO:0006865: amino acid transport, GO:0015807: L-amino acid transport, GO:0016020: membrane, GO:0016021: integral to membrane, GO:0003824: catalytic activity, GO:0005279: amino acid-polyamine transporter activity, GO:0015171: amino acid transporter activity, GO:0015179: L-amino acid transporter activity, GO:0015359: amino acid perm…		gb:BB433596 /DB_XREF=gi:16424297 /DB_XREF=BB433596 /CLONE=C820002H14 /FEA=EST /CNT=6 /TID=Mm.129110.1 /TIER=ConsEnd /STK=5 /UG=Mm.129110 /UG_TITLE=ESTs
1455398_at	control	12.6488	3.3192	PPP-PPP	1265.83	76.7972	381.37	93.6524	1336.8	1184.3	1276.4	470.8	389.3	284	Lrrc8c	leucine rich repeat containing 8 family, member C	5	5 E5	105759772	BB333759	100604	10349636, 11042159, 11076861, 11125038, 11217851, 12466851, 12477932, 15184384, 16141072, 16141073	GO:0016020: membrane, GO:0016021: integral to membrane, GO:0005515: protein binding		gb:BB333759 /DB_XREF=gi:16404024 /DB_XREF=BB333759 /CLONE=B830015D21 /FEA=EST /CNT=35 /TID=Mm.35303.1 /TIER=Stack /STK=14 /UG=Mm.35303 /UG_TITLE=ESTs
1449602_at	control	12.6012	5.4722	PPP-PPP	252.27	27.8561	46.1	5.2029	283.4	229.7	243.7	41	51.4	45.9	Klhl5	kelch-like 5 (Drosophila)	5	5 C3.1	65410807	AI785329	71778	10349636, 10922068, 11042159, 11076861, 11125038, 11217851, 11544199, 12466851, 12477932, 15618518, 15782199, 16141072, 16141073	GO:0005515: protein binding		gb:AI785329 /DB_XREF=gi:5333045 /DB_XREF=uj40d03.x1 /CLONE=IMAGE:1922405 /FEA=EST /CNT=2 /TID=Mm.26758.2 /TIER=ConsEnd /STK=2 /UG=Mm.26758 /UG_TITLE=ESTs
1429590_at	control	12.5829	2.7253	PPP-PPP	966.83	63.0353	354.77	55.9008	1037.4	947	916.1	329.8	418.8	315.7	Tacc1	transforming, acidic coiled-coil containing protein 1	8	8 A2	-26620097	BE862546	320165	8889548, 10349636, 11042159, 11076861, 11217851, 12466851, 12477932, 15207008, 15226440, 15782199, 16141072, 16141073, 16496324	GO:0007049: cell cycle, GO:0051301: cell division, GO:0005634: nucleus, GO:0005515: protein binding		gb:AK019530.1 /DB_XREF=gi:12859795 /FEA=mRNA /CNT=27 /TID=Mm.150176.1 /TIER=Stack /STK=13 /UG=Mm.150176 /LL=78791 /UG_GENE=4833447E04Rik /UG_TITLE=RIKEN cDNA 4833447E04 gene /DEF=Mus musculus 0 day neonate head cDNA, RIKEN full-length enriched library, clone:4833447E04:homolog to TRANSFORMING ACIDIC COILED-COIL-CONTAINING PROTEIN 3, full insert sequence.
1448730_at	control	12.5811	11.9469	PPP-AAA	734.33	81.479	61.47	44.0709	755.7	803	644.3	81.8	91.7	10.9	Cpa3	carboxypeptidase A3, mast cell	3	3 A2	-20407672	NM_007753	12873	1744088, 2584208, 2594780, 7515715, 8018917, 8098710, 8562971, 10349636, 10466726, 11042159, 11076861, 11217851, 11707070, 12466851, 12477932, 12921743, 15173164, 15226823, 15860733, 15988029, 16141072, 16141073	GO:0006508: proteolysis, GO:0005615: extracellular space, GO:0004180: carboxypeptidase activity, GO:0004182: carboxypeptidase A activity, GO:0008233: peptidase activity, GO:0008237: metallopeptidase activity, GO:0008270: zinc ion binding, GO:0016787: hydrolase activity, GO:0046872: metal ion binding		gb:NM_007753.1 /DB_XREF=gi:6680998 /GEN=Cpa3 /FEA=FLmRNA /CNT=62 /TID=Mm.1135.1 /TIER=FL+Stack /STK=44 /UG=Mm.1135 /LL=12873 /DEF=Mus musculus carboxypeptidase A3, mast cell (Cpa3), mRNA. /PROD=carboxypeptidase A3, mast cell /FL=gb:J05118.1 gb:NM_007753.1
1455958_s_at	control	12.568	1.9585	PPP-PPP	2726.9	170.827	1392.33	68.1605	2811.3	2839.1	2530.3	1383.2	1329.2	1464.6	Pptc7	PTC7 protein phosphatase homolog (S. cerevisiae)	5	5 F	122545014	AI881989	320717	8889548, 10349636, 11042159, 11076861, 11217851, 12466851, 12477932, 15782199, 16141072, 16141073	GO:0003824: catalytic activity, GO:0004721: phosphoprotein phosphatase activity		gb:AI881989 /DB_XREF=gi:5567141 /DB_XREF=ul56h07.x1 /CLONE=IMAGE:2123101 /FEA=EST /CNT=96 /TID=Mm.200168.1 /TIER=Stack /STK=22 /UG=Mm.200168 /LL=100547 /UG_GENE=AA672638 /UG_TITLE=expressed sequence AA672638
1446497_at	control	12.5412	6.894	PPP-PPA	1097.07	129.448	159.13	4.8014	1112	1218.4	960.8	164.4	158	155	Nav1	neuron navigator 1	1	1 E4	-137255283	BB499356	215690	8889548, 10349636, 11042159, 11076861, 11217851, 12062803, 12079279, 12466851, 12477932, 12693553, 15158073, 15797708, 16141072, 16141073	GO:0001578: microtubule bundle formation, GO:0001764: neuron migration, GO:0008152: metabolic process, GO:0015630: microtubule cytoskeleton, GO:0016020: membrane, GO:0000166: nucleotide binding, GO:0005524: ATP binding, GO:0016462: pyrophosphatase activity, GO:0017111: nucleoside-triphosphatase activity		gb:BB499356 /DB_XREF=gi:16442174 /DB_XREF=BB499356 /CLONE=D630020I22 /FEA=EST /CNT=2 /TID=Mm.213351.1 /TIER=ConsEnd /STK=2 /UG=Mm.213351 /UG_TITLE=ESTs
1455522_at	control	12.5401	4.5689	PPP-AAA	358.2	34.5584	78.4	17.2988	398	340.8	335.8	96.4	61.9	76.9	Arhgef15	Rho guanine nucleotide exchange factor (GEF) 15	11	11 B3	-68759349	AW492648	442801	10349636, 11042159, 11076861, 11217851, 12466851, 12477932, 15368895, 16141072, 16141073	GO:0006334: nucleosome assembly, GO:0007001: chromosome organization and biogenesis (sensu Eukaryota), GO:0008150: biological_process, GO:0035023: regulation of Rho protein signal transduction, GO:0000786: nucleosome, GO:0005575: cellular_component, GO:0005622: intracellular, GO:0005634: nucleus, GO:0003674: molecular_function, GO:0003677: DNA binding, GO:0005089: Rho guanyl-nucleotide exchange f…		gb:AW492648 /DB_XREF=gi:7062894 /DB_XREF=UI-M-BH3-att-e-08-0-UI.s1 /CLONE=UI-M-BH3-att-e-08-0-UI /FEA=EST /CNT=16 /TID=Mm.92700.1 /TIER=Stack /STK=12 /UG=Mm.92700 /UG_TITLE=ESTs
1424114_s_at	control	12.4997	3.8083	PPP-PPP	4590.1	116.195	1205.3	454.404	4470.7	4596.8	4702.8	1730	942.5	943.4	Lamb1-1	laminin B1 subunit 1	12	12 A3	31851348	BG970109	16777	1292752, 1339296, 1612587, 1725162, 1907584, 1922066, 2088723, 2100263, 2436975, 2570028, 2993224, 3402995, 3493487, 6189826, 6209134, 7516699, 7544312, 7601910, 7669546, 7851641, 7873892, 7895274, 7949730, 8043949, 8075499, 8082056, 8098844, 8219353, 8276400, 8286607, 8359228, 8482578, 8486351, 8562707, 8613743, 8636104, 8645318, 8672144, 8719886, 8722691, 8725284, 8812145, 8872465, 8918877, 895…	GO:0007155: cell adhesion, GO:0007566: embryo implantation, GO:0005578: extracellular matrix (sensu Metazoa), GO:0005604: basement membrane, GO:0005605: basal lamina, GO:0005201: extracellular matrix structural constituent, GO:0005515: protein binding, GO:0019899: enzyme binding	01430: Cell Communication, 04510: Focal adhesion, 04512: ECM-receptor interaction, 05060: Prion disease	gb:M15525.1 /DB_XREF=gi:198700 /FEA=FLmRNA /CNT=143 /TID=Mm.148395.1 /TIER=FL+Stack /STK=52 /UG=Mm.148395 /LL=16777 /UG_GENE=Lamb1-1 /DEF=Mouse laminin B1 mRNA, complete cds. /PROD=laminin B1 /FL=gb:M15525.1
1429168_at	control	12.454	3.1303	PPP-AAA	229.77	12.0022	73.4	18.1348	229.5	241.9	217.9	88	53.1	79.1	Btbd4	BTB (POZ) domain containing 4	2	2 H4	-181339956	AK011461	72147	10349636, 10922068, 11042159, 11076861, 11217851, 12466851, 12477932, 16141072, 16141073	GO:0006350: transcription, GO:0006355: regulation of transcription, DNA-dependent, GO:0008150: biological_process, GO:0005575: cellular_component, GO:0005622: intracellular, GO:0005634: nucleus, GO:0003674: molecular_function, GO:0003676: nucleic acid binding, GO:0005515: protein binding, GO:0008270: zinc ion binding, GO:0046872: metal ion binding		gb:AK011461.1 /DB_XREF=gi:12847598 /FEA=mRNA /CNT=20 /TID=Mm.56581.1 /TIER=Stack /STK=10 /UG=Mm.56581 /LL=72147 /UG_GENE=2610019F01Rik /UG_TITLE=RIKEN cDNA 2610019F01 gene /DEF=Mus musculus 10 days embryo whole body cDNA, RIKEN full-length enriched library, clone:2610019F01:homolog to DJ583P15.8 (PUTATIVE NOVEL BTBPOZ DOMAIN CONTAINING ZINC FINGER PROTEIN) (FRAGMENT), full insert sequence.
1439489_at	control	12.4518	54.4449	PPP-AAA	493.63	66.6035	9.07	10.352	552.8	506.6	421.5	2.5	21	3.7	Gpr120	G protein-coupled receptor 120	19	19 C2-C3	38162222	AV025152	107221	10349636, 11042159, 11076861, 11217851, 12466851, 12477932, 12605897, 12679517, 14623098, 15619630, 15774482, 16141072, 16141073	GO:0007165: signal transduction, GO:0007186: G-protein coupled receptor protein signaling pathway, GO:0046879: hormone secretion, GO:0005886: plasma membrane, GO:0016020: membrane, GO:0016021: integral to membrane, GO:0030139: endocytic vesicle, GO:0001584: rhodopsin-like receptor activity, GO:0004871: signal transducer activity, GO:0004872: receptor activity, GO:0004930: G-protein coupled recept…		gb:AV025152 /DB_XREF=gi:15431435 /DB_XREF=AV025152 /CLONE=1200010P16 /FEA=EST /CNT=14 /TID=Mm.35288.1 /TIER=ConsEnd /STK=7 /UG=Mm.35288 /LL=107221 /UG_GENE=AI552415 /UG_TITLE=expressed sequence AI552415
1452440_at	control	12.4255	2.2432	PPP-PPP	650.97	41.6328	290.2	28.208	638.9	616.7	697.3	297.7	313.9	259	Tnfsf12	tumor necrosis factor (ligand) superfamily, member 12	11		-69502542	BI730298	21944	9405449, 10349636, 11042159, 11076861, 11217851, 11239407, 12466851, 12794080, 12821115, 12840022, 14573547, 15385607, 15681834, 15850771, 16110324, 16141072, 16141073, 16267216, 16325585, 16424220, 16461349, 16526941, 16547002, 16887827, 16888023, 17003819, 17056575, 17124496	GO:0001525: angiogenesis, GO:0006915: apoptosis, GO:0006955: immune response, GO:0007275: multicellular organismal development, GO:0008219: cell death, GO:0030154: cell differentiation, GO:0005576: extracellular region, GO:0005615: extracellular space, GO:0016020: membrane, GO:0016021: integral to membrane, GO:0005125: cytokine activity, GO:0005164: tumor necrosis factor receptor binding	04060: Cytokine-cytokine receptor interaction	gb:BI730298 /DB_XREF=gi:15707311 /DB_XREF=603350276F1 /CLONE=IMAGE:5357634 /FEA=mRNA /CNT=25 /TID=Mm.8983.1 /TIER=ConsEnd /STK=0 /UG=Mm.8983 /LL=21944 /UG_GENE=Tnfsf12 /UG_TITLE=tumor necrosis factor (ligand) superfamily, member 12
1438705_at	control	12.4231	9.8923	PPP-AAA	685.53	59.9136	69.3	61.579	703.1	734.7	618.8	135	60	12.9	Cbfa2t3h	core-binding factor, runt domain, alpha subunit 2, translocated to, 3 homolog (human)	8		-125516080	BB471309	12398	9790752, 10022820, 10349636, 11042159, 11076861, 11217851, 12466851, 12477932, 15231665, 16141072, 16141073, 16287841, 16407974	GO:0006355: regulation of transcription, DNA-dependent, GO:0030851: granulocyte differentiation, GO:0005622: intracellular, GO:0005634: nucleus, GO:0003700: transcription factor activity, GO:0008270: zinc ion binding		gb:BB471309 /DB_XREF=gi:16427900 /DB_XREF=BB471309 /CLONE=D230038M02 /FEA=EST /CNT=33 /TID=Mm.12429.2 /TIER=Stack /STK=9 /UG=Mm.12429 /LL=12398 /UG_GENE=Cbfa2t3h /UG_TITLE=core-binding factor, runt domain, alpha subunit 2; translocated to, 3 homolog (human)
1436051_at	control	12.4156	4.9438	PPP-PPP	982.5	67.3958	198.73	86.0994	945.2	1060.3	942	273.5	218.1	104.6	Myo5a	myosin Va	9	9 D	74857810	BQ174518	17918	310441, 478292, 828052, 1009575, 1150661, 1203051, 1329656, 1346782, 1350660, 1378547, 1398056, 1421760, 1421769, 1748176, 1871601, 1883968, 1981995, 1996138, 2022949, 2138915, 2300051, 2303033, 2379821, 2544008, 2571572, 2572508, 3000867, 3079812, 3141922, 3410303, 3422417, 3664469, 3681112, 3839241, 4327930, 4382005, 4566335, 4634048, 4693062, 4782668, 4830244, 5021438, 5279341, 5358144, 542450…	GO:0006582: melanin metabolic process, GO:0006887: exocytosis, GO:0007010: cytoskeleton organization and biogenesis, GO:0007268: synaptic transmission, GO:0007601: visual perception, GO:0030048: actin filament-based movement, GO:0030050: vesicle transport along actin filament, GO:0030073: insulin secretion, GO:0030318: melanocyte differentiation, GO:0031585: regulation of IP3 receptor activity, G…		gb:BQ174518 /DB_XREF=gi:20350009 /DB_XREF=UI-M-DJ2-bvy-i-12-0-UI.s1 /CLONE=UI-M-DJ2-bvy-i-12-0-UI /FEA=EST /CNT=36 /TID=Mm.200292.1 /TIER=Stack /STK=11 /UG=Mm.200292 /LL=102493 /UG_GENE=AI413174 /UG_TITLE=expressed sequence AI413174
1424654_at	control	12.4037	1.6379	PPP-PPP	684.13	15.8418	417.7	33.6635	698.9	667.4	686.1	416.6	384.6	451.9	Acp2	acid phosphatase 2, lysosomal	2	2 E1	91003768	BB022890	11432	1506664, 1914521, 2059337, 3146546, 3559163, 7063884, 7323947, 8456115, 8889548, 9228031, 9545490, 10349636, 10594242, 11042159, 11076861, 11217851, 11731469, 12466851, 12477932, 15503243, 15604265, 16141072, 16141073	GO:0001501: skeletal development, GO:0007040: lysosome organization and biogenesis, GO:0005764: lysosome, GO:0005764: lysosome, GO:0003993: acid phosphatase activity, GO:0003993: acid phosphatase activity, GO:0016787: hydrolase activity	00361: gamma-Hexachlorocyclohexane degradation, 00740: Riboflavin metabolism	gb:BC023343.1 /DB_XREF=gi:19484057 /FEA=FLmRNA /CNT=82 /TID=Mm.45570.1 /TIER=FL+Stack /STK=21 /UG=Mm.45570 /LL=11432 /UG_GENE=Acp2 /DEF=Mus musculus, Similar to Acid phosphatase 2, lysozymal, clone MGC:31030 IMAGE:5136781, mRNA, complete cds. /PROD=Similar to Acid phosphatase 2, lysozymal /FL=gb:BC023343.1
1449510_at	control	12.3427	3.2417	PPP-PAA	325.47	28.2624	100.4	14.0982	297.7	324.5	354.2	111	84.4	105.8	Zfp467	zinc finger protein 467	6	6 B2.3	-48367171	NM_020589	68910	8889548, 10349636, 11042159, 11076861, 11217851, 12426389, 12466851, 12477932, 15618518, 15782199, 16141072, 16141073	GO:0006350: transcription, GO:0006355: regulation of transcription, DNA-dependent, GO:0045449: regulation of transcription, GO:0005622: intracellular, GO:0005634: nucleus, GO:0003676: nucleic acid binding, GO:0003677: DNA binding, GO:0005515: protein binding, GO:0008270: zinc ion binding, GO:0046872: metal ion binding		gb:NM_020589.1 /DB_XREF=gi:10181127 /GEN=AB041616 /FEA=FLmRNA /CNT=60 /TID=Mm.2464.1 /TIER=FL+Stack /STK=8 /UG=Mm.2464 /LL=57318 /DEF=Mus musculus hypothetical protein, MNCb-3350 (AB041616), mRNA. /PROD=hypothetical protein, MNCb-3350 /FL=gb:NM_020589.1
1448407_at	control	12.335	2.4574	PPP-PPP	571.5	27.4088	232.57	38.9071	543.7	598.5	572.3	235	192.5	270.2	4632428N05Rik	RIKEN cDNA 4632428N05 gene	10	10 B4	59742260	BC003967	74048	8889548, 10349636, 10922068, 11042159, 11076861, 11217851, 12466851, 12477932, 15449545, 16141072, 16141073	GO:0005615: extracellular space, GO:0016020: membrane, GO:0016021: integral to membrane, GO:0004872: receptor activity		gb:BC003967.1 /DB_XREF=gi:13278279 /FEA=FLmRNA /CNT=193 /TID=Mm.33926.1 /TIER=FL+Stack /STK=78 /UG=Mm.33926 /LL=74048 /UG_GENE=4632428N05Rik /DEF=Mus musculus, RIKEN cDNA 4632428N05 gene, clone MGC:7407 IMAGE:3488482, mRNA, complete cds. /PROD=RIKEN cDNA 4632428N05 gene /FL=gb:NM_028732.1 gb:BC003967.1
1445204_at	control	12.3326	3.9909	PPP-PPP	569.77	59.1237	142.77	10.0381	604.5	603.3	501.5	131.2	147.9	149.2	Ccdc85a	coiled-coil domain containing 85A	11	11 A3.3	-28288814	BB393368	216613	8889548, 10349636, 11042159, 11076861, 11125038, 11217851, 12466851, 12477932, 15368895, 16141072, 16141073			gb:BB393368 /DB_XREF=gi:9116342 /DB_XREF=BB393368 /CLONE=C230083G24 /FEA=EST /CNT=3 /TID=Mm.136996.1 /TIER=ConsEnd /STK=2 /UG=Mm.136996 /UG_TITLE=ESTs
1451140_s_at	control	12.3012	3.3877	PPP-PPP	838.33	76.1509	247.47	33.506	779.7	924.4	810.9	280.6	213.6	248.2	Prkag2	protein kinase, AMP-activated, gamma 2 non-catalytic subunit	5	5 A3	-24372821	BB756794	108099	8889548, 10098881, 10349636, 11042159, 11076861, 11217851, 12466851, 12477932, 16141072, 16141073, 16339829, 16675525	GO:0006633: fatty acid biosynthetic process, GO:0006695: cholesterol biosynthetic process, GO:0006950: response to stress, GO:0008610: lipid biosynthetic process, GO:0004679: AMP-activated protein kinase activity, GO:0016301: kinase activity	04910: Insulin signaling pathway, 04920: Adipocytokine signaling pathway	gb:BB756794 /DB_XREF=gi:16203121 /DB_XREF=BB756794 /CLONE=G270078K08 /FEA=FLmRNA /CNT=153 /TID=Mm.33649.1 /TIER=Stack /STK=29 /UG=Mm.33649 /UG_TITLE=Mus musculus, clone MGC:18882 IMAGE:4238045, mRNA, complete cds /FL=gb:BC015283.1
1424354_at	control	12.2792	6.0607	PPP-PPP	1237.6	144.203	204.2	21.2995	1233.1	1095.7	1384	220.5	180.1	212	Tmem140	transmembrane protein 140	6	6 B1	34793297	BC020080	68487	10349636, 11042159, 11076861, 11217851, 12466851, 12477932, 16141072, 16141073	GO:0016020: membrane, GO:0016021: integral to membrane		gb:BC020080.1 /DB_XREF=gi:18043290 /FEA=FLmRNA /CNT=68 /TID=Mm.46356.1 /TIER=FL+Stack /STK=36 /UG=Mm.46356 /DEF=Mus musculus, clone MGC:28217 IMAGE:3990521, mRNA, complete cds. /PROD=Unknown (protein for MGC:28217) /FL=gb:BC020080.1
1428479_at	control	12.2649	4.4232	PPP-PPP	953.2	92.7377	215.5	47.4634	1014.4	998.7	846.5	204.8	174.3	267.4	Nfatc1	nuclear factor of activated T-cells, cytoplasmic, calcineurin-dependent 1	18	18 E4	-80768263, -80809878	BB356861	18018	7842733, 8629027, 9017603, 9388475, 9462518, 9515963, 9515964, 9768749, 10349636, 10755616, 10888889, 10903175, 11042159, 11076861, 11163226, 11217851, 11437450, 11439183, 11782539, 11786533, 11937535, 12091710, 12121669, 12163407, 12171919, 12466851, 12469121, 12477932, 12479813, 12594266, 12598522, 12660151, 12738787, 12810687, 12970181, 14595020, 14681302, 14738882, 15030770, 15057750, 1509659…	GO:0000082: G1/S transition of mitotic cell cycle, GO:0001837: epithelial to mesenchymal transition, GO:0006350: transcription, GO:0006355: regulation of transcription, DNA-dependent, GO:0006816: calcium ion transport, GO:0007507: heart development, GO:0045449: regulation of transcription, GO:0005634: nucleus, GO:0005737: cytoplasm, GO:0003677: DNA binding, GO:0003700: transcription factor activi…	04310: Wnt signaling pathway, 04360: Axon guidance, 04370: VEGF signaling pathway, 04650: Natural killer cell mediated cytotoxicity, 04660: T cell receptor signaling pathway, 04662: B cell receptor signaling pathway	gb:BB356861 /DB_XREF=gi:16405768 /DB_XREF=BB356861 /CLONE=C030017K09 /FEA=mRNA /CNT=59 /TID=Mm.153412.1 /TIER=Stack /STK=39 /UG=Mm.153412 /LL=72364 /UG_GENE=2210017P03Rik /UG_TITLE=RIKEN cDNA 2210017P03 gene
1431394_a_at	control	12.202	5.6207	PPP-PAA	444.6	41.4438	79.1	31.2117	487.1	404.3	442.4	103.4	90	43.9	Lrrk2	leucine-rich repeat kinase 2	15	15 F1	91501047	AK014938	66725	10349636, 11004510, 11042159, 11076861, 11217851, 12466851, 12477932, 15541309, 16141072, 16141073, 16771836, 16980962, 17114044	GO:0006468: protein amino acid phosphorylation, GO:0007264: small GTPase mediated signal transduction, GO:0005575: cellular_component, GO:0005622: intracellular, GO:0000166: nucleotide binding, GO:0004672: protein kinase activity, GO:0004674: protein serine/threonine kinase activity, GO:0005096: GTPase activator activity, GO:0005488: binding, GO:0005515: protein binding, GO:0005524: ATP binding, …	01510: Neurodegenerative Disorders	gb:AK014938.1 /DB_XREF=gi:12853065 /FEA=mRNA /CNT=3 /TID=Mm.37558.2 /TIER=ConsEnd /STK=0 /UG=Mm.37558 /LL=66725 /UG_GENE=4921513O20Rik /UG_TITLE=RIKEN cDNA 4921513O20 gene /DEF=Mus musculus adult male testis cDNA, RIKEN full-length enriched library, clone:4921521H10:Protein kinase domain containing protein, full insert sequence.
1455959_s_at	control	12.1516	2.5152	PPP-PPP	1633.2	127.28	649.33	58.8752	1658.7	1745.8	1495.1	586	702.4	659.6	Gclc	glutamate-cysteine ligase, catalytic subunit	9	9 D-E	77540493	AW825835	14629	7578676, 8825659, 9223101, 9224945, 9441766, 9582278, 9811942, 10349636, 10421798, 10725249, 10805773, 10922068, 10966520, 11032771, 11042159, 11076861, 11118286, 11217851, 11933164, 12063408, 12363041, 12384496, 12466851, 12477932, 15288121, 15336720, 15629866, 16081425, 16141072, 16141073, 16324789, 16403949, 16840778, 17189825	GO:0006534: cysteine metabolic process, GO:0006536: glutamate metabolic process, GO:0006749: glutathione metabolic process, GO:0006750: glutathione biosynthetic process, GO:0006750: glutathione biosynthetic process, GO:0006750: glutathione biosynthetic process, GO:0006916: anti-apoptosis, GO:0006979: response to oxidative stress, GO:0009408: response to heat, GO:0009725: response to hormone stimu…	00251: Glutamate metabolism, 00480: Glutathione metabolism	gb:AW825835 /DB_XREF=gi:7918912 /DB_XREF=us17a10.x1 /CLONE=IMAGE:3167322 /FEA=EST /CNT=41 /TID=Mm.196494.1 /TIER=Stack /STK=22 /UG=Mm.196494 /LL=28039 /UG_GENE=D9Wsu168e /UG_TITLE=DNA segment, Chr 9, Wayne State University 168, expressed
1415894_at	control	12.1088	7.9807	PPP-PPA	993.07	104.342	124.43	67.4596	919.6	947.1	1112.5	185.8	135.3	52.2	Enpp2	ectonucleotide pyrophosphatase/phosphodiesterase 2	15	15 D2	-54668983	BC003264	18606	8889548, 9853961, 10349636, 10473125, 10702660, 10702665, 11042159, 11076861, 11217851, 12466851, 12477932, 12642576, 12834871, 15226265, 15371327, 15378605, 15700135, 15733672, 15782199, 15930494, 16141072, 16141073, 16219296, 16436050, 16782887, 16829511	GO:0008152: metabolic process, GO:0009117: nucleotide metabolic process, GO:0005615: extracellular space, GO:0005887: integral to plasma membrane, GO:0016020: membrane, GO:0016021: integral to membrane, GO:0003676: nucleic acid binding, GO:0003824: catalytic activity, GO:0004519: endonuclease activity, GO:0004528: phosphodiesterase I activity, GO:0004528: phosphodiesterase I activity, GO:0004551:…	00230: Purine metabolism, 00500: Starch and sucrose metabolism, 00740: Riboflavin metabolism, 00760: Nicotinate and nicotinamide metabolism, 00770: Pantothenate and CoA biosynthesis	gb:AW125230 /DB_XREF=gi:6100760 /DB_XREF=UI-M-BH2.1-aps-d-09-0-UI.s1 /CLONE=UI-M-BH2.1-aps-d-09-0-UI /FEA=FLmRNA /CNT=373 /TID=Mm.28107.1 /TIER=ConsEnd /STK=1 /UG=Mm.28107 /LL=18606 /UG_GENE=Enpp2 /UG_TITLE=ectonucleotide pyrophosphatasephosphodiesterase 2 /FL=gb:BC003264.1 gb:AF123542.1 gb:NM_015744.1
1418511_at	control	12.0921	32.8542	PPP-PPA	14638.7	1983.7	445.57	445.04	12378.4	15447.6	16090.2	329.3	937.2	70.2	Dpt	dermatopontin	1	1 H2	166633406	NM_019759	56429	10349636, 11042159, 11076861, 11217851, 12230512, 12466851, 12477932, 14980498, 15312129, 16141072, 16141073, 16877395, 16978288, 17118749	GO:0007155: cell adhesion, GO:0005578: extracellular matrix (sensu Metazoa), GO:0005615: extracellular space, GO:0005515: protein binding		gb:NM_019759.1 /DB_XREF=gi:9789942 /GEN=Dpt /FEA=FLmRNA /CNT=84 /TID=Mm.28935.1 /TIER=FL+Stack /STK=22 /UG=Mm.28935 /LL=56429 /DEF=Mus musculus dermatopontin (Dpt), mRNA. /PROD=dermatopontin /FL=gb:NM_019759.1 gb:AF143374.1
1444444_at	control	12.088	2.8392	AAP-AAA	54.13	2.9535	19.07	4.0649	51.1	57	54.3	16.1	17.4	23.7						BE981420					gb:BE981420 /DB_XREF=gi:10650509 /DB_XREF=UI-M-CG0p-bdc-a-02-0-UI.s1 /CLONE=UI-M-CG0p-bdc-a-02-0-UI /FEA=EST /CNT=4 /TID=Mm.151250.1 /TIER=ConsEnd /STK=2 /UG=Mm.151250 /UG_TITLE=ESTs
1424542_at	control	12.0829	7.3306	PPP-PPA	1172.17	114.241	159.9	89.4687	1096.7	1303.6	1116.2	190.7	229.9	59.1	S100a4	S100 calcium binding protein A4	3	3 F1-F2	90689696	D00208	20198	1329089, 1337998, 2149559, 2332170, 2550322, 3162911, 3628004, 7511035, 7546288, 7615639, 7620916, 7772039, 7912076, 7919958, 8033131, 8043949, 8051043, 8276262, 8423998, 8645219, 8701470, 8824556, 8895507, 8895508, 9018119, 9030539, 9337130, 9413186, 9468217, 9788607, 9920410, 9920416, 10349636, 10395934, 10625627, 11042159, 11076861, 11217851, 11407987, 11423996, 11498791, 11914069, 11994292, 1…	GO:0005509: calcium ion binding, GO:0005515: protein binding		gb:D00208.1 /DB_XREF=gi:220569 /FEA=FLmRNA /CNT=46 /TID=Mm.3925.1 /TIER=FL+Stack /STK=25 /UG=Mm.3925 /LL=20198 /UG_GENE=S100a4 /DEF=Mus musculus mRNA for pEL98 protein, complete cds. /PROD=pEL98 protein /FL=gb:D00208.1
1438667_at	control	12.073	10.3618	PPP-AAA	384.77	44.7142	37.13	22.0899	382	341.5	430.8	54.9	12.4	44.1	5730410E15Rik	RIKEN cDNA 5730410E15 gene	15	15 B3.2	-44501930	BB009277	319613	10349636, 11042159, 11076861, 11125038, 11217851, 12466851, 12477932, 16141072, 16141073, 16572588, 16750881	GO:0016020: membrane, GO:0016021: integral to membrane		gb:BB009277 /DB_XREF=gi:15403226 /DB_XREF=BB009277 /CLONE=4732488L18 /FEA=EST /CNT=77 /TID=Mm.5252.2 /TIER=Stack /STK=9 /UG=Mm.5252 /UG_TITLE=ESTs, Moderately similar to YE72_HUMAN HYPOTHETICAL PROTEIN KIAA1472 (H.sapiens)
1449298_a_at	control	12.0687	9.0514	PPP-AAA	458	52.2392	50.6	26.2604	515.9	443.7	414.4	44.1	79.5	28.2	Pde1a	phosphodiesterase 1A, calmodulin-dependent	2	2 D	-79659864, -79635294	NM_016744	18573	8889548, 9003415, 9032278, 10349636, 10922068, 11042159, 11076861, 11217851, 12466851, 12477932, 15901640, 16141072, 16141073, 16514069	GO:0007165: signal transduction, GO:0003824: catalytic activity, GO:0004114: 3',5'-cyclic-nucleotide phosphodiesterase activity, GO:0005516: calmodulin binding, GO:0016787: hydrolase activity	00230: Purine metabolism, 04020: Calcium signaling pathway, 04742: Taste transduction	gb:NM_016744.1 /DB_XREF=gi:7949106 /GEN=Pde1a /FEA=FLmRNA /CNT=35 /TID=Mm.40678.1 /TIER=FL+Stack /STK=15 /UG=Mm.40678 /LL=18573 /DEF=Mus musculus phosphodiesterase 1A, calmodulin-dependent (Pde1a), mRNA. /PROD=phosphodiesterase 1A, calmodulin-dependent /FL=gb:U56649.1 gb:NM_016744.1
1450966_at	control	12.0528	6.2863	PPP-PPA	1390.53	86.1766	221.2	144.26	1292.3	1425.9	1453.4	367.8	216.4	79.4	Crot	carnitine O-octanoyltransferase	5	5 A1	-8972053	BB283187	74114	6436243, 8889548, 10349636, 10725249, 10922068, 11042159, 11076861, 11217851, 11452036, 12466851, 12477932, 15492013, 16141072, 16141073	GO:0006629: lipid metabolic process, GO:0006631: fatty acid metabolic process, GO:0006810: transport, GO:0015908: fatty acid transport, GO:0005777: peroxisome, GO:0008415: acyltransferase activity, GO:0008458: carnitine O-octanoyltransferase activity, GO:0016740: transferase activity		gb:BB283187 /DB_XREF=gi:8983636 /DB_XREF=BB283187 /CLONE=A930101D22 /FEA=FLmRNA /CNT=134 /TID=Mm.28197.1 /TIER=Stack /STK=9 /UG=Mm.28197 /LL=74114 /UG_GENE=Crot /UG_TITLE=carnitine O-octanoyltransferase /FL=gb:BC012308.1 gb:NM_023733.1 gb:BC006593.1
1451469_at	control	12.0237	3.0651	PPP-PPM	421.97	31.2105	137.67	26.5172	446.7	386.9	432.3	167.2	129.9	115.9	D530005L17Rik	RIKEN cDNA D530005L17 gene	4	4 C4	84355557	BC027370	338349	8889548, 10349636, 10922068, 11042159, 11076861, 11125038, 11217851, 12466851, 12477932, 16141072, 16141073, 16919269			gb:BC027370.1 /DB_XREF=gi:20071779 /FEA=FLmRNA /CNT=25 /TID=Mm.30933.1 /TIER=FL+Stack /STK=17 /UG=Mm.30933 /DEF=Mus musculus, clone MGC:36999 IMAGE:4948503, mRNA, complete cds. /PROD=Unknown (protein for MGC:36999) /FL=gb:BC027370.1
1428349_s_at	control	11.9914	25.9855	PPP-AMA	1495.9	207.263	57.57	14.2858	1314.9	1450.8	1722	43.9	72.4	56.4	Ebf3	early B-cell factor 3	7	7 F3-F4	-137032063	AK014058	13593	9151732, 9389446, 10349636, 10704382, 11042159, 11076752, 11076861, 11163266, 11217851, 11493561, 12023301, 12139918, 12466851, 12477932, 12917357, 14993187, 15033168, 15229182, 15261831, 15618518, 16141072, 16141073, 16632597, 16774995, 16919269	GO:0006350: transcription, GO:0006355: regulation of transcription, DNA-dependent, GO:0007275: multicellular organismal development, GO:0045449: regulation of transcription, GO:0045941: positive regulation of transcription, GO:0005634: nucleus, GO:0003677: DNA binding, GO:0005515: protein binding, GO:0008270: zinc ion binding, GO:0030528: transcription regulator activity, GO:0046872: metal ion bi…		gb:BB284100 /DB_XREF=gi:16401413 /DB_XREF=BB284100 /CLONE=A930104J12 /FEA=mRNA /CNT=83 /TID=Mm.178549.1 /TIER=Stack /STK=9 /UG=Mm.178549 /LL=73115 /UG_GENE=3110018A08Rik /UG_TITLE=RIKEN cDNA 3110018A08 gene
1442393_at	control	11.9773	10.2045	PPP-PAA	389.13	49.0266	38.13	13.1462	333.9	406	427.5	36.3	52.1	26	Zeb2	zinc finger E-box binding homeobox 2	2	2 C1	-44805740, -44805642	BB488200	24136	8889548, 10349636, 10400677, 11042159, 11076861, 11217851, 11448942, 11451567, 11477103, 11592033, 11857784, 12466851, 12477932, 12522767, 12609600, 12693553, 13679026, 15006694, 15489854, 16127714, 16141072, 16141073, 16157277, 16162653, 16458080, 16516881, 16598713, 16919269, 16957952	GO:0001755: neural crest cell migration, GO:0001756: somitogenesis, GO:0001843: neural tube closure, GO:0006350: transcription, GO:0006355: regulation of transcription, DNA-dependent, GO:0007417: central nervous system development, GO:0016481: negative regulation of transcription, GO:0045449: regulation of transcription, GO:0048598: embryonic morphogenesis, GO:0005622: intracellular, GO:0005634: …		gb:BB488200 /DB_XREF=gi:16441615 /DB_XREF=BB488200 /CLONE=D430048E20 /FEA=EST /CNT=5 /TID=Mm.122524.1 /TIER=ConsEnd /STK=3 /UG=Mm.122524 /UG_TITLE=ESTs
1416880_at	control	11.9742	1.2567	PPP-PPP	5393.87	137.627	4292.13	80.3469	5529.9	5254.7	5397	4311.1	4204	4361.3	Mcl1	myeloid cell leukemia sequence 1	3	3 F2.1	95744196	BC003839	17210	7626896, 7835896, 7896880, 9184696, 9655929, 9671497, 9916985, 10349636, 10640272, 10922068, 11042159, 11076861, 11118352, 11217851, 11290297, 11546872, 12466851, 12477932, 12612065, 14668867, 15286683, 15351513, 15550399, 15694340, 15718471, 15721256, 15798198, 15870695, 15901672, 16051596, 16141072, 16141073, 16227588, 16247470, 16822835, 17234790	GO:0006915: apoptosis, GO:0007275: multicellular organismal development, GO:0030154: cell differentiation, GO:0042981: regulation of apoptosis, GO:0005634: nucleus, GO:0005739: mitochondrion, GO:0016020: membrane, GO:0016021: integral to membrane, GO:0005515: protein binding		gb:NM_008562.1 /DB_XREF=gi:6678823 /GEN=Mcl1 /FEA=FLmRNA /CNT=288 /TID=Mm.1639.1 /TIER=FL+Stack /STK=52 /UG=Mm.1639 /LL=17210 /DEF=Mus musculus myeloid cell leukemia sequence 1 (Mcl1), mRNA. /PROD=myeloid cell leukemia sequence 1 /FL=gb:BC003839.1 gb:U35623.1 gb:BC021638.1 gb:NM_008562.1 gb:BC005427.1
1445837_at	control	11.9301	5.3904	PPP-PPP	1102.7	112.182	204.57	66.4663	1170.1	973.2	1164.8	280.7	174.9	158.1	Ga17	dendritic cell protein GA17	2	2 E2	-104800497	BB461843	98221	7671812, 8889548, 10349636, 10568747, 10725249, 10922068, 11042159, 11076861, 11217851, 11889558, 12466851, 12477932, 15782199, 16141072, 16141073			gb:BB461843 /DB_XREF=gi:16426704 /DB_XREF=BB461843 /CLONE=D130073P12 /FEA=EST /CNT=3 /TID=Mm.210082.1 /TIER=ConsEnd /STK=2 /UG=Mm.210082 /UG_TITLE=ESTs
1418808_at	control	11.9123	1.659	PPP-PPP	227.07	9.5814	136.87	8.9556	230.7	234.3	216.2	128.1	136.5	146	Rdh5	retinol dehydrogenase 5	10	10 D3	-128316540	NM_134006	19682	8889548, 9115228, 9426003, 9539749, 9654122, 10349636, 10588954, 10739682, 10753524, 10825191, 11042159, 11076861, 11217851, 11418621, 11747070, 11907141, 12128098, 12466851, 12477932, 12716426, 15634683, 16141072, 16141073, 17003450	GO:0008152: metabolic process, GO:0016021: integral to membrane, GO:0004745: retinol dehydrogenase activity, GO:0016491: oxidoreductase activity	00830: Retinol metabolism	gb:NM_134006.1 /DB_XREF=gi:19549322 /GEN=Rdh5 /FEA=FLmRNA /CNT=28 /TID=Mm.7563.1 /TIER=FL+Stack /STK=18 /UG=Mm.7563 /LL=19682 /DEF=Mus musculus retinol dehydrogenase type 5 (Rdh5), mRNA. /PROD=retinol dehydrogenase type 5 /FL=gb:AF033196.1 gb:NM_134006.1 gb:AF033195.1 gb:AF013288.1 gb:BC021372.1
1428847_a_at	control	11.9106	2.3593	PPP-PPP	2082.5	121.578	882.67	125.15	2067.7	1969	2210.8	1020.7	776.6	850.7	Macf1	microtubule-actin crosslinking factor 1	4	4 D2.2		BM248206	11426	8889548, 8954775, 9878243, 10349636, 10601340, 10653359, 10721728, 10747097, 10922068, 11002341, 11042159, 11076861, 11217851, 11544199, 12399109, 12466851, 12477932, 12693553, 14636561, 15028287, 15582152, 16076900, 16141072, 16141073, 16815997	GO:0001707: mesoderm formation, GO:0005975: carbohydrate metabolic process, GO:0006620: posttranslational protein targeting to membrane, GO:0006928: cell motility, GO:0007050: cell cycle arrest, GO:0007163: establishment and/or maintenance of cell polarity, GO:0016055: Wnt receptor signaling pathway, GO:0016055: Wnt receptor signaling pathway, GO:0005856: cytoskeleton, GO:0015629: actin cytoskele…		gb:BM250469 /DB_XREF=gi:17885739 /DB_XREF=K0850C07-3 /CLONE=K0850C07 /FEA=mRNA /CNT=72 /TID=Mm.3350.2 /TIER=Stack /STK=19 /UG=Mm.3350 /LL=11426 /UG_GENE=Aclp7 /UG_TITLE=actin-crosslinking protein 7
1428432_at	control	11.9071	4.7396	PPP-PPP	1830.27	201.501	386.17	59.3684	1636.5	1815.6	2038.7	399.7	321.2	437.6	2310047A01Rik	RIKEN cDNA 2310047A01 gene	14	14 A3		BB813478	71918	8889548, 10349636, 11042159, 11076861, 11217851, 12466851, 12477932, 16141072, 16141073	GO:0003676: nucleic acid binding, GO:0008270: zinc ion binding		gb:BB813478 /DB_XREF=gi:16986107 /DB_XREF=BB813478 /CLONE=G730019E19 /FEA=mRNA /CNT=101 /TID=Mm.41904.1 /TIER=Stack /STK=18 /UG=Mm.41904 /LL=71918 /UG_GENE=2310047A01Rik /UG_TITLE=RIKEN cDNA 2310047A01 gene
1441241_at	control	11.9032	7.9602	PPP-AAA	346.8	42.2739	43.57	12.6433	333.2	394.2	313	29.1	49.1	52.5	9630013D21Rik	RIKEN cDNA 9630013D21 gene	4	4 C7	-109150365	BB126309	319743	10349636, 11042159, 11076861, 11217851, 12466851, 16141072, 16141073			gb:BB126309 /DB_XREF=gi:16262269 /DB_XREF=BB126309 /CLONE=9630013D21 /FEA=EST /CNT=5 /TID=Mm.119546.1 /TIER=ConsEnd /STK=4 /UG=Mm.119546 /UG_TITLE=ESTs
1418400_at	control	11.8884	10.0378	PPP-AAA	168.3	22.0154	16.77	1.6503	181.9	142.9	180.1	18.6	15.4	16.3	Larp6	La ribonucleoprotein domain family, member 6	9	9 B	60511126	NM_026235	67557	8889548, 10349636, 11042159, 11076861, 11217851, 12466851, 12477932, 16033648, 16141072, 16141073	GO:0006396: RNA processing, GO:0005634: nucleus, GO:0030529: ribonucleoprotein complex, GO:0003723: RNA binding		gb:NM_026235.1 /DB_XREF=gi:13385739 /GEN=5430431G03Rik /FEA=FLmRNA /CNT=40 /TID=Mm.35755.1 /TIER=FL+Stack /STK=24 /UG=Mm.35755 /LL=67557 /DEF=Mus musculus RIKEN cDNA 5430431G03 gene (5430431G03Rik), mRNA. /PROD=RIKEN cDNA 5430431G03 /FL=gb:NM_026235.1
1434856_at	control	11.8553	9.79	PPP-PPP	2176	273.435	222.27	81.9109	2491.3	2004	2032.7	310.3	208.2	148.3	Ankrd44	ankyrin repeat domain 44	1	1 C1.1	-54589884	AV256780	329154	10349636, 11042159, 11076861, 11217851, 12466851, 12477932, 16141072, 16141073	GO:0003677: DNA binding		gb:AV256780 /DB_XREF=gi:15405340 /DB_XREF=AV256780 /CLONE=4921531B21 /FEA=EST /CNT=46 /TID=Mm.218595.3 /TIER=Stack /STK=24 /UG=Mm.218595 /UG_TITLE=Mus musculus, clone MGC:19199 IMAGE:4236882, mRNA, complete cds
1435385_at	control	11.8543	11.5905	PPP-PPA	1048.17	119.505	90.43	72.8045	929.3	1046.9	1168.3	147.7	115.1	8.5	Tshz2	teashirt zinc finger family member 2	2	2 H3	169324880	AW556161	228911	8889548, 10349636, 10704881, 10725249, 10922068, 11042159, 11076861, 11217851, 11668608, 12466851, 12477932, 12881723, 14645530, 14973285, 15834955, 16141072, 16141073, 16516881, 16631416	GO:0006350: transcription, GO:0006355: regulation of transcription, DNA-dependent, GO:0007275: multicellular organismal development, GO:0008150: biological_process, GO:0045449: regulation of transcription, GO:0005575: cellular_component, GO:0005622: intracellular, GO:0005634: nucleus, GO:0003674: molecular_function, GO:0003676: nucleic acid binding, GO:0003677: DNA binding, GO:0003700: transcript…		gb:AW556161 /DB_XREF=gi:7201590 /DB_XREF=L0264F06-3 /CLONE=L0264F06 /FEA=EST /CNT=35 /TID=Mm.28740.1 /TIER=Stack /STK=17 /UG=Mm.28740 /LL=118455 /UG_GENE=Sdccag33l-pending /UG_TITLE=serologically defined colon cancer antigen 33 like
1425629_a_at	control	11.8291	1.489	APA-AAA	354.93	10.2481	238.37	13.6489	353.3	345.6	365.9	254.1	231.3	229.7	Nol6	nucleolar protein family 6 (RNA-associated)	4	4 A5	-41303097	AF361078	230082	8889548, 10349636, 10922068, 11042159, 11076861, 11217851, 11895476, 12466851, 12477932, 12692149, 15782199, 16141072, 16141073	GO:0006365: 35S primary transcript processing, GO:0008150: biological_process, GO:0000794: condensed nuclear chromosome, GO:0005634: nucleus, GO:0005730: nucleolus, GO:0005732: small nucleolar ribonucleoprotein complex, GO:0003674: molecular_function, GO:0003723: RNA binding, GO:0005515: protein binding, GO:0030515: snoRNA binding		gb:AF361078.1 /DB_XREF=gi:18539462 /FEA=FLmRNA /CNT=19 /TID=Mm.36418.2 /TIER=FL /STK=1 /UG=Mm.36418 /DEF=Mus musculus nucleolar RNA-associated protein beta mRNA, complete cds. /PROD=nucleolar RNA-associated protein beta /FL=gb:AF361078.1
1449102_at	control	11.7759	14.8052	PPP-PPA	747.17	95.1132	50.47	38.1356	717.8	670.2	853.5	80.3	63.6	7.5	Ebf2	early B-cell factor 2	14	14 D-E1	66187401	U71189	13592	9151732, 9186059, 9211912, 9322939, 9389446, 10349636, 10381577, 10704382, 11042159, 11076752, 11076861, 11180952, 11217851, 11498051, 11581159, 11944980, 12139918, 12466206, 12466851, 12477932, 12917357, 14993187, 15152034, 15229182, 15261831, 15618518, 15930111, 16141072, 16141073, 16326388, 16602821, 16774995, 16919269, 16964442, 17060461	GO:0006350: transcription, GO:0006355: regulation of transcription, DNA-dependent, GO:0007275: multicellular organismal development, GO:0045449: regulation of transcription, GO:0045941: positive regulation of transcription, GO:0005634: nucleus, GO:0003677: DNA binding, GO:0005515: protein binding, GO:0008270: zinc ion binding, GO:0030528: transcription regulator activity, GO:0046872: metal ion bi…		gb:U71189.1 /DB_XREF=gi:2145128 /GEN=Ebf2 /FEA=FLmRNA /CNT=35 /TID=Mm.179.1 /TIER=FL /STK=1 /UG=Mm.179 /LL=13592 /DEF=Mus musculus met-mesencephalon-olfactory transcription factor 1 (Ebf2) mRNA, complete cds. /PROD=met-mesencephalon-olfactory transcription factor1 /FL=gb:U92703.1 gb:U82441.1 gb:NM_010095.1 gb:U71189.1
1456392_at	control	11.7724	66.8057	PPP-AAA	630.2	90.9477	9.43	8.3728	529.6	654.4	706.6	18.9	3	6.4	Negr1	neuronal growth regulator 1	3	3 H4	156497251, 156497086	BM118381	320840	10330412, 10349636, 11042159, 11076861, 11217851, 12466851, 12693553, 15328020, 16141072, 16141073	GO:0007155: cell adhesion, GO:0005615: extracellular space, GO:0016020: membrane, GO:0005515: protein binding, GO:0048503: GPI anchor binding	04514: Cell adhesion molecules (CAMs)	gb:BM118381 /DB_XREF=gi:17086407 /DB_XREF=L0910B11-3 /CLONE=L0910B11 /FEA=EST /CNT=41 /TID=Mm.39339.1 /TIER=Stack /STK=10 /UG=Mm.39339 /UG_TITLE=ESTs
1422514_at	control	11.7567	3.2465	PPP-PPA	691.93	49.6367	213.13	50.1195	748.8	669.7	657.3	270.7	189.5	179.2	Aebp1	AE binding protein 1	11	11 A1	5761949	NM_009636	11568	7477299, 8920928, 9624159, 10349636, 10666112, 11042159, 11076861, 11217851, 11438679, 12466851, 12477932, 15654748, 15749083, 15782199, 16141072, 16141073, 16461908, 16537572	GO:0006355: regulation of transcription, DNA-dependent, GO:0006508: proteolysis, GO:0007155: cell adhesion, GO:0005615: extracellular space, GO:0005634: nucleus, GO:0003677: DNA binding, GO:0003714: transcription corepressor activity, GO:0004180: carboxypeptidase activity, GO:0004182: carboxypeptidase A activity		gb:NM_009636.1 /DB_XREF=gi:6752997 /GEN=Aebp1 /FEA=FLmRNA /CNT=120 /TID=Mm.4665.1 /TIER=FL+Stack /STK=57 /UG=Mm.4665 /LL=11568 /DEF=Mus musculus AE binding protein 1 (Aebp1), mRNA. /PROD=AE binding protein 1 /FL=gb:AF053943.1 gb:NM_009636.1
1436435_at	control	11.7558	6.6937	PPP-PPA	190.1	21.9153	28.4	9.344	204.7	164.9	200.7	35.8	31.5	17.9	9530026P05Rik	RIKEN cDNA 9530026P05 gene	6	6 D1		BB277190	330385	10349636, 11042159, 11076861, 11217851, 12466851, 16141072, 16141073			gb:BB277190 /DB_XREF=gi:16400952 /DB_XREF=BB277190 /CLONE=A930002N16 /FEA=EST /CNT=12 /TID=Mm.131838.1 /TIER=Stack /STK=9 /UG=Mm.131838 /UG_TITLE=ESTs
1444585_at	control	11.7152	2.4384	PPP-PPP	492.63	29.854	202.03	30.8973	514.4	458.6	504.9	227.6	210.8	167.7	Adc	arginine decarboxylase	4	4 D2.2	-128434449	BE946956	242669	8889548, 10349636, 11042159, 11076861, 11217851, 12466851, 12477932, 16141072, 16141073, 16916800	GO:0006596: polyamine biosynthetic process, GO:0007283: spermatogenesis, GO:0007283: spermatogenesis, GO:0003824: catalytic activity, GO:0008792: arginine decarboxylase activity, GO:0016829: lyase activity, GO:0016831: carboxy-lyase activity	00220: Urea cycle and metabolism of amino groups, 00251: Glutamate metabolism	gb:BE946956 /DB_XREF=gi:10524715 /DB_XREF=UI-M-BH3-axg-b-12-0-UI.s1 /CLONE=UI-M-BH3-axg-b-12-0-UI /FEA=EST /CNT=4 /TID=Mm.35283.1 /TIER=ConsEnd /STK=2 /UG=Mm.35283 /UG_TITLE=ESTs
1442537_at	control	11.7085	24.137	PPP-AAA	569.63	80.3857	23.6	7.9221	595.9	633.6	479.4	30.6	25.2	15						BB771206					gb:BB771206 /DB_XREF=gi:16195031 /DB_XREF=BB771206 /CLONE=G370123F14 /FEA=EST /CNT=4 /TID=Mm.216619.1 /TIER=ConsEnd /STK=3 /UG=Mm.216619 /UG_TITLE=ESTs, Weakly similar to TYROSINE-PROTEIN KINASE JAK3 (M.musculus)
1435169_at	control	11.7004	2.0642	PPP-PPP	1005.83	66.9785	487.27	37.507	960	1082.7	974.8	517.8	498.6	445.4	A930001N09Rik	RIKEN cDNA A930001N09 gene	17	17 B1	26443239	BB431047	77128	8889548, 10349636, 11042159, 11076861, 11217851, 12466851, 12477932, 16141072, 16141073	GO:0006355: regulation of transcription, DNA-dependent, GO:0005634: nucleus, GO:0003700: transcription factor activity, GO:0043565: sequence-specific DNA binding, GO:0046983: protein dimerization activity		gb:BB431047 /DB_XREF=gi:16424134 /DB_XREF=BB431047 /CLONE=C630036G05 /FEA=EST /CNT=31 /TID=Mm.52252.2 /TIER=Stack /STK=19 /UG=Mm.52252 /UG_TITLE=ESTs, Weakly similar to PGG2 RAT CHONDROITIN SULFATE PROTEOGLYCAN NG2 PRECURSOR (R.norvegicus)
1448167_at	control	11.7	2.4546	PPP-PPP	1854.4	134.117	755.47	92.0803	1701.9	1954	1907.3	857.6	730	678.8	Ifngr1	interferon gamma receptor 1	10	10 A3	19281373	NM_010511	15979	1981053, 2137461, 2530216, 2530582, 2531896, 2532365, 2852162, 2952646, 7507352, 7537305, 7561088, 7609046, 7650382, 7722464, 7759999, 7777519, 7843255, 7869054, 7890167, 7959748, 8009221, 8051408, 8163930, 8182339, 8188645, 8341679, 8376946, 8454850, 8456301, 8609383, 8613694, 8752933, 8832969, 8875885, 8943375, 8990382, 9064329, 9143700, 9144077, 9164949, 9164971, 9164973, 9164974, 9169506, 938…	GO:0005615: extracellular space, GO:0016020: membrane, GO:0016021: integral to membrane, GO:0004872: receptor activity, GO:0019955: cytokine binding	04060: Cytokine-cytokine receptor interaction, 04630: Jak-STAT signaling pathway, 04650: Natural killer cell mediated cytotoxicity	gb:NM_010511.1 /DB_XREF=gi:6754305 /GEN=Ifngr /FEA=FLmRNA /CNT=215 /TID=Mm.549.1 /TIER=FL+Stack /STK=150 /UG=Mm.549 /LL=15979 /DEF=Mus musculus interferon gamma receptor (Ifngr), mRNA. /PROD=interferon gamma receptor /FL=gb:AF128217.1 gb:AF128216.1 gb:M28233.1 gb:M26711.1 gb:M28995.1 gb:J05265.1 gb:M25764.1 gb:NM_010511.1
1460013_at	control	11.6727	1.6048	AAP-AAA	243.67	10.2188	151.83	9.0146	254.5	242.3	234.2	155.3	141.6	158.6	Nlgn2	neuroligin 2	11	11 B3	-69639317	BF465089	216856	8889548, 9647694, 10349636, 10725249, 11042159, 11076861, 11217851, 12466851, 12477932, 15368895, 15540461, 15681343, 16141072, 16141073, 16186258, 16982420	GO:0007155: cell adhesion, GO:0050808: synapse organization and biogenesis, GO:0016020: membrane, GO:0016021: integral to membrane, GO:0045202: synapse, GO:0004759: serine esterase activity, GO:0005515: protein binding		gb:BF465089 /DB_XREF=gi:11534272 /DB_XREF=UI-M-CG0p-bqg-f-03-0-UI.s1 /CLONE=UI-M-CG0p-bqg-f-03-0-UI /FEA=EST /CNT=16 /TID=Mm.40693.1 /TIER=Stack /STK=8 /UG=Mm.40693 /UG_TITLE=ESTs, Weakly similar to BILE-SALT-ACTIVATED LIPASE PRECURSOR (M.musculus)
1431055_a_at	control	11.6553	4.7831	PPP-PPP	1808.97	198.542	378.2	76.0808	1949.3	1895.8	1581.8	380.7	453	300.9	Snx10	sorting nexin 10	6	6 B3	51474105	AK010399	71982	10349636, 10922068, 11042159, 11076861, 11217851, 12466851, 12477932, 16141072, 16141073, 16829211	GO:0006810: transport, GO:0007154: cell communication, GO:0007242: intracellular signaling cascade, GO:0015031: protein transport, GO:0005515: protein binding, GO:0035091: phosphoinositide binding		gb:AK010399.1 /DB_XREF=gi:12845814 /FEA=mRNA /CNT=12 /TID=Mm.29101.2 /TIER=ConsEnd /STK=0 /UG=Mm.29101 /LL=71982 /UG_GENE=2410004M09Rik /UG_TITLE=RIKEN cDNA 2410004M09 gene /DEF=Mus musculus ES cells cDNA, RIKEN full-length enriched library, clone:2410004M09:homolog to SORTING NEXIN 10, full insert sequence.
1428663_at	control	11.6501	3.749	PPP-PPP	657.57	55.2569	175.4	45.6659	604.4	653.6	714.7	150.6	228.1	147.5	5133401H06Rik	RIKEN cDNA 5133401H06 gene	3			AK017223	71305	10349636, 10922068, 11042159, 11076861, 11217851, 12466851, 16141072, 16141073			gb:AK017223.1 /DB_XREF=gi:12856357 /FEA=mRNA /CNT=36 /TID=Mm.35676.1 /TIER=Stack /STK=27 /UG=Mm.35676 /LL=71305 /UG_GENE=5133401H06Rik /UG_TITLE=RIKEN cDNA 5133401H06 gene /DEF=Mus musculus 10 days neonate intestine cDNA, RIKEN full-length enriched library, clone:5133401H06:unclassifiable transcript, full insert sequence.
1437291_at	control	11.6159	3.0405	PPP-PPP	407.43	24.5197	134	32.575	394.7	435.7	391.9	168.9	104.4	128.7	2700081O15Rik	RIKEN cDNA 2700081O15 gene	19	19 A	7487592	AV131166	108899	8889548, 10349636, 11042159, 11076861, 11217851, 12466851, 12477932, 16141072, 16141073	GO:0005622: intracellular, GO:0003676: nucleic acid binding, GO:0008270: zinc ion binding		gb:AV131166 /DB_XREF=gi:16382621 /DB_XREF=AV131166 /CLONE=2700081O15 /FEA=EST /CNT=122 /TID=Mm.29565.1 /TIER=Stack /STK=20 /UG=Mm.29565 /LL=107135 /UG_GENE=AI255177 /UG_TITLE=expressed sequence AI255177
1430604_a_at	control	11.5955	1.3621	PPP-PPP	196.37	7.5745	144.17	1.8502	194.5	189.9	204.7	142.3	146	144.2	Dab2	disabled homolog 2 (Drosophila)	15	15 6.7 cM	6247063, 6333979, 6333991	AW986632	13132	7775479, 8889548, 9811942, 10340473, 10349636, 10488064, 10725249, 10779506, 10922068, 10944463, 11042159, 11076861, 11217851, 11368898, 11823414, 11927540, 12234931, 12413896, 12466851, 12477932, 12805222, 12826668, 14660441, 15734730, 15769480, 15870384, 16109395, 16141072, 16141073, 16263760, 16629596, 16678776, 16816378, 16887818, 17182866	GO:0000904: cellular morphogenesis during differentiation, GO:0001701: embryonic development (sensu Mammalia), GO:0006898: receptor-mediated endocytosis, GO:0006907: pinocytosis, GO:0007588: excretion, GO:0005905: coated pit, GO:0005515: protein binding		gb:AW986632 /DB_XREF=gi:8181318 /DB_XREF=uf85g06.x1 /CLONE=IMAGE:1528954 /FEA=mRNA /CNT=10 /TID=Mm.34248.3 /TIER=ConsEnd /STK=1 /UG=Mm.34248 /LL=13132 /UG_GENE=Dab2 /UG_TITLE=disabled homolog 2 (Drosophila)
1445518_at	control	11.5497	6.0823	PPP-PPP	571.33	70.2301	93.93	13.9055	503.7	643.9	566.4	102.7	101.2	77.9	Zeb2	zinc finger E-box binding homeobox 2	2	2 C1	-44805740, -44805642	BG061923	24136	8889548, 10349636, 10400677, 11042159, 11076861, 11217851, 11448942, 11451567, 11477103, 11592033, 11857784, 12466851, 12477932, 12522767, 12609600, 12693553, 13679026, 15006694, 15489854, 16127714, 16141072, 16141073, 16157277, 16162653, 16458080, 16516881, 16598713, 16919269, 16957952	GO:0001755: neural crest cell migration, GO:0001756: somitogenesis, GO:0001843: neural tube closure, GO:0006350: transcription, GO:0006355: regulation of transcription, DNA-dependent, GO:0007417: central nervous system development, GO:0016481: negative regulation of transcription, GO:0045449: regulation of transcription, GO:0048598: embryonic morphogenesis, GO:0005622: intracellular, GO:0005634: …		gb:BG061923 /DB_XREF=gi:12531906 /DB_XREF=L0953F01-3 /CLONE=L0953F01 /FEA=EST /CNT=3 /TID=Mm.161312.1 /TIER=ConsEnd /STK=2 /UG=Mm.161312 /UG_TITLE=ESTs
1449468_at	control	11.5391	47.7029	PPP-AAA	497.7	73.0821	10.43	2.9143	462.7	448.7	581.7	11.7	12.5	7.1	St6galnac5	ST6 (alpha-N-acetyl-neuraminyl-2,3-beta-galactosyl-1,3)-N-acetylgalactosaminide alpha-2,6-sialyltransferase 5	3	3 H3	-152757273	NM_012028	26938	8889548, 10349636, 10521438, 10601645, 11042159, 11076861, 11125038, 11217851, 12466851, 12477932, 16141072, 16141073	GO:0006486: protein amino acid glycosylation, GO:0005615: extracellular space, GO:0016020: membrane, GO:0016021: integral to membrane, GO:0030173: integral to Golgi membrane, GO:0008373: sialyltransferase activity, GO:0016740: transferase activity, GO:0016757: transferase activity, transferring glycosyl groups	00604: Glycosphingolipid biosynthesis - ganglioseries, 01031: Glycan structures - biosynthesis 2	gb:NM_012028.1 /DB_XREF=gi:6755513 /GEN=Siat7e /FEA=FLmRNA /CNT=31 /TID=Mm.40915.1 /TIER=FL /STK=5 /UG=Mm.40915 /LL=26938 /DEF=Mus musculus sialyltransferase 7 ((alpha-N-acetylneuraminyl 2,3-betagalactosyl-1,3)-N-acetyl galactosaminide alpha-2,6-sialyltransferase) E (Siat7e), mRNA. /PROD=sialyltransferase 7 ((alpha-N-acetylneuraminyl2,3-betagalactosyl-1,3)-N-acetyl galactosaminidealpha-2,6-sialyl…
1460580_at	control	11.537	2.7228	PPP-PPP	923.03	21.9329	339	84.8935	897.9	932.9	938.3	421.5	343.6	251.9	Pcnx	pecanex homolog (Drosophila)	12	12 D1	82778877	BB772192	54604	10349636, 10922068, 11042159, 11076861, 11217851, 12466851, 12477932, 14621295, 15747579, 16141072, 16141073	GO:0016020: membrane, GO:0016021: integral to membrane		gb:BB772192 /DB_XREF=gi:16213883 /DB_XREF=BB772192 /CLONE=G370140M24 /FEA=EST /CNT=48 /TID=Mm.22991.1 /TIER=Stack /STK=19 /UG=Mm.22991 /LL=76599 /UG_GENE=2900024E21Rik /UG_TITLE=RIKEN cDNA 2900024E21 gene
1454893_at	control	11.4885	5.6977	PPP-PAP	488.87	50.9867	85.8	33.0624	533.3	433.2	500.1	113	49	95.4	1110013L07Rik	RIKEN cDNA 1110013L07 gene	3	3 F1	89269151	BB765852	68521	8889548, 10349636, 11042159, 11076861, 11217851, 12466851, 12477932, 16141072, 16141073			gb:BB765852 /DB_XREF=gi:16196787 /DB_XREF=BB765852 /CLONE=G370057B17 /FEA=EST /CNT=55 /TID=Mm.27168.1 /TIER=Stack /STK=37 /UG=Mm.27168 /UG_TITLE=ESTs, Moderately similar to COTE_HUMAN COTE1 PROTEI (H.sapiens)
1444036_at	control	11.4834	6.0988	PPP-PPP	378.73	42.9658	62.1	20.8511	342.5	367.5	426.2	84.8	57.7	43.8	Ppp2r5a	protein phosphatase 2, regulatory subunit B (B56), alpha isoform	1	1 H6	-193052595	BB325197	226849	8889548, 10349636, 11042159, 11076861, 11217851, 12466851, 12477932, 15095873, 15226823, 16141072, 16141073	GO:0007165: signal transduction, GO:0000159: protein phosphatase type 2A complex, GO:0005488: binding, GO:0008601: protein phosphatase type 2A regulator activity		gb:BB325197 /DB_XREF=gi:16403549 /DB_XREF=BB325197 /CLONE=B430114M06 /FEA=EST /CNT=6 /TID=Mm.149279.1 /TIER=ConsEnd /STK=2 /UG=Mm.149279 /UG_TITLE=ESTs
1452217_at	control	11.4449	4.7327	PPP-PPP	15187.1	1618.32	3208.97	816.765	13672.7	16892.4	14996.2	3943.5	2329.4	3354	Ahnak	AHNAK nucleoprotein (desmoyokin)	19	19 A	9056328	BE570050	66395	8408266, 8889548, 9730611, 10349636, 11042159, 11076861, 11217851, 11284963, 12466851, 12477932, 12617833, 14516657, 15007166, 15033986, 15373775, 15493012, 16141072, 16141073	GO:0007242: intracellular signaling cascade, GO:0005911: intercellular junction, GO:0005515: protein binding		gb:BE570050 /DB_XREF=gi:9813770 /DB_XREF=601332076F1 /CLONE=IMAGE:3709507 /FEA=mRNA /CNT=127 /TID=Mm.203866.1 /TIER=Stack /STK=45 /UG=Mm.203866 /LL=107095 /UG_GENE=AA589382 /UG_TITLE=expressed sequence AA589382
1429030_at	control	11.4428	10.1505	PPM-AAA	139.4	16.6721	13.73	9.1577	125.8	134.4	158	8.8	24.3	8.1	C1qtnf7	C1q and tumor necrosis factor related protein 7	5	5 B3	43803835	AV366874	109323	10349636, 11042159, 11076861, 11217851, 12466851, 12477932, 15231994, 16141072, 16141073	GO:0006817: phosphate transport, GO:0051260: protein homooligomerization, GO:0005615: extracellular space, GO:0005737: cytoplasm, GO:0003674: molecular_function		gb:AV366874 /DB_XREF=gi:16397689 /DB_XREF=AV366874 /CLONE=8430425G24 /FEA=mRNA /CNT=21 /TID=Mm.33391.1 /TIER=Stack /STK=14 /UG=Mm.33391 /LL=71441 /UG_GENE=5530401N20Rik /UG_TITLE=RIKEN cDNA 5530401N20 gene
1438861_at	control	11.3998	25.0673	PPP-AAA	1315.2	191.822	52.47	3.5642	1526.8	1152.7	1266.1	53.5	55.4	48.5	Bnc2	basonuclin 2	4	4 C4	-83746325	BB482899	242509	10349636, 10922068, 11042159, 11076861, 11217851, 12466851, 12477932, 14988505, 15081112, 16141072, 16141073, 16325481, 16891417	GO:0006350: transcription, GO:0006355: regulation of transcription, DNA-dependent, GO:0008150: biological_process, GO:0005622: intracellular, GO:0005634: nucleus, GO:0003676: nucleic acid binding, GO:0003677: DNA binding, GO:0008270: zinc ion binding, GO:0046872: metal ion binding		gb:BB482899 /DB_XREF=gi:16440973 /DB_XREF=BB482899 /CLONE=D430017I21 /FEA=EST /CNT=14 /TID=Mm.190774.1 /TIER=Stack /STK=9 /UG=Mm.190774 /UG_TITLE=ESTs, Weakly similar to BASO_MOUSE ZINC FINGER PROTEIN BASONUCLIN (M.musculus)
1452868_at	control	11.381	2.2168	PPP-PPP	1224.73	95.2214	552.47	37.421	1135.1	1324.7	1214.4	594.8	538.8	523.8	Usp24	ubiquitin specific peptidase 24	4	4 C7		AK012842	329908	8889548, 10349636, 10725249, 10922068, 11042159, 11076861, 11217851, 12466851, 12477932, 16141072, 16141073	GO:0006511: ubiquitin-dependent protein catabolic process, GO:0006810: transport, GO:0016020: membrane, GO:0004221: ubiquitin thiolesterase activity, GO:0005215: transporter activity		gb:AK012842.1 /DB_XREF=gi:12849849 /FEA=mRNA /CNT=60 /TID=Mm.148342.1 /TIER=Stack /STK=26 /UG=Mm.148342 /LL=72686 /UG_GENE=2810030C21Rik /UG_TITLE=RIKEN cDNA 2810030C21 gene /DEF=Mus musculus 10, 11 days embryo whole body cDNA, RIKEN full-length enriched library, clone:2810030C21:hypothetical protein, full insert sequence.
1416051_at	control	11.3627	9.6265	PPP-AAA	692.47	93.8676	71.93	11.6663	791.5	604.8	681.1	75.5	81.4	58.9	C2	complement component 2 (within H-2S)	17	17 B1	-34470663	NM_013484	12263	1394787, 1970336, 2229060, 2883115, 3034587, 3902621, 6088393, 6190740, 6735447, 6770000, 7641699, 8133044, 8138038, 8409391, 8624034, 8700167, 8824158, 9430715, 10229798, 10349636, 10686478, 11042159, 11076861, 11217851, 11261934, 11359841, 11739537, 12466851, 12477932, 14656967, 15782199, 16002707, 16141072, 16141073	GO:0006508: proteolysis, GO:0006955: immune response, GO:0006956: complement activation, GO:0006958: complement activation, classical pathway, GO:0045087: innate immune response, GO:0005576: extracellular region, GO:0005615: extracellular space, GO:0003813: classical-complement-pathway C3/C5 convertase activity, GO:0004252: serine-type endopeptidase activity, GO:0008233: peptidase activity, GO:00…	04610: Complement and coagulation cascades	gb:NM_013484.1 /DB_XREF=gi:7304936 /GEN=C2 /FEA=FLmRNA /CNT=183 /TID=Mm.2081.1 /TIER=FL+Stack /STK=138 /UG=Mm.2081 /LL=12263 /DEF=Mus musculus complement component 2 (within H-2S) (C2), mRNA. /PROD=complement component 2 (within H-2S) /FL=gb:BC011086.1 gb:NM_013484.1 gb:M57891.1
1418084_at	control	11.3403	7.6498	PPP-PPP	2708.53	355.305	354.07	55.4624	2439.9	3111.4	2574.3	391.9	379.9	290.4	Nrp1	neuropilin 1	8	8 E	131245329	AK011144	18186	8575331, 8748368, 9288753, 9331348, 9390514, 9742149, 9753685, 9811588, 10229225, 10328887, 10349636, 10409677, 10518505, 10675351, 10705382, 10707970, 10725340, 11025205, 11027230, 11042159, 11076861, 11084652, 11160433, 11165481, 11217851, 11231073, 11238106, 11442635, 11461151, 11688557, 11756651, 11786422, 11804779, 11830568, 11891274, 11906695, 11939589, 12036513, 12093729, 12118260, 1236197…	GO:0001525: angiogenesis, GO:0007155: cell adhesion, GO:0007275: multicellular organismal development, GO:0007399: nervous system development, GO:0007411: axon guidance, GO:0007507: heart development, GO:0016358: dendrite development, GO:0016477: cell migration, GO:0030154: cell differentiation, GO:0030517: negative regulation of axon extension, GO:0048010: vascular endothelial growth factor rece…	04360: Axon guidance	gb:NM_008737.1 /DB_XREF=gi:6679133 /GEN=Nrp /FEA=FLmRNA /CNT=224 /TID=Mm.27448.1 /TIER=FL+Stack /STK=30 /UG=Mm.27448 /LL=18186 /DEF=Mus musculus neuropilin (Nrp), mRNA. /PROD=neuropilin /FL=gb:D50086.1 gb:NM_008737.1
1423797_at	control	11.318	2.7006	PPP-PPP	935.57	25.6711	346.43	86.426	942.3	907.2	957.2	417.7	250.3	371.3	Aacs	acetoacetyl-CoA synthetase	5	5 F	125765333	BC026817	78894	8889548, 9671465, 10349636, 10922068, 11042159, 11076861, 11217851, 12466851, 12477932, 12623130, 15782199, 16141072, 16141073	GO:0008152: metabolic process, GO:0008299: isoprenoid biosynthetic process, GO:0003824: catalytic activity, GO:0016405: CoA-ligase activity, GO:0016874: ligase activity, GO:0030729: acetoacetate-CoA ligase activity	00650: Butanoate metabolism	gb:BC026817.1 /DB_XREF=gi:20073186 /FEA=FLmRNA /CNT=185 /TID=Mm.41565.1 /TIER=FL+Stack /STK=109 /UG=Mm.41565 /LL=78894 /UG_GENE=2210408B16Rik /DEF=Mus musculus, RIKEN cDNA 2210408B16 gene, clone MGC:28651 IMAGE:4235112, mRNA, complete cds. /PROD=RIKEN cDNA 2210408B16 gene /FL=gb:AB056114.1 gb:BC026817.1
1424056_at	control	11.3142	1.4732	PPP-PPP	1151.23	16.8767	781.47	54.0319	1170.4	1138.6	1144.7	801.4	720.3	822.7	Usp48	ubiquitin specific peptidase 48	4	4 D3	136866264	BC019125	170707	8889548, 10349636, 10922068, 11042159, 11076861, 11217851, 12466851, 12477932, 15782199, 16141072, 16141073	GO:0006464: protein modification, GO:0006511: ubiquitin-dependent protein catabolic process, GO:0006512: ubiquitin cycle, GO:0005634: nucleus, GO:0004221: ubiquitin thiolesterase activity, GO:0008233: peptidase activity, GO:0008234: cysteine-type peptidase activity, GO:0016787: hydrolase activity		gb:BC019125.1 /DB_XREF=gi:17512307 /FEA=FLmRNA /CNT=93 /TID=Mm.21824.1 /TIER=FL+Stack /STK=58 /UG=Mm.21824 /LL=72765 /UG_GENE=2810449C13Rik /DEF=Mus musculus, RIKEN cDNA 2810449C13 gene, clone MGC:29313 IMAGE:5007611, mRNA, complete cds. /PROD=RIKEN cDNA 2810449C13 gene /FL=gb:BC019125.1
1422603_at	control	11.3071	3.8297	PPP-PPP	5498.23	420.726	1435.67	458.548	5540.9	5057.8	5896	1783.4	1607.6	916	Rnase4	ribonuclease, RNase A family 4	14		50013146, 50018351	BC005569	58809	8889548, 10349636, 11042159, 11076861, 11217851, 11856874, 12466851, 12477932, 15676279, 15722482, 16141072, 16141073	GO:0003676: nucleic acid binding, GO:0004518: nuclease activity, GO:0004519: endonuclease activity, GO:0004522: pancreatic ribonuclease activity, GO:0016787: hydrolase activity		gb:BC005569.1 /DB_XREF=gi:13542727 /FEA=FLmRNA /CNT=103 /TID=Mm.175173.1 /TIER=FL+Stack /STK=28 /UG=Mm.175173 /LL=58809 /UG_GENE=Rnase4 /DEF=Mus musculus, ribonuclease, RNase A family 4, clone MGC:11599 IMAGE:3967265, mRNA, complete cds. /PROD=ribonuclease, RNase A family 4 /FL=gb:AB041044.1 gb:NM_021472.1 gb:BC005569.1
1433563_s_at	control	11.3026	2.2315	PPP-AAA	1102.6	36.7755	494.1	85.6909	1127.8	1060.4	1119.6	573.4	505.7	403.2	Derl1	Der1-like domain family, member 1	15	15 D2	-57699584	AV310010	67819	10349636, 10922068, 11042159, 11076861, 11217851, 12466851, 12477932, 15215855, 15782199, 16055502, 16141072, 16141073	GO:0006810: transport, GO:0006986: response to unfolded protein, GO:0015031: protein transport, GO:0019060: intracellular transport of viral proteins in host cell, GO:0030433: ER-associated protein catabolic process, GO:0030968: unfolded protein response, GO:0030970: retrograde protein transport, ER to cytosol, GO:0005783: endoplasmic reticulum, GO:0005783: endoplasmic reticulum, GO:0016020: memb…		gb:AV310010 /DB_XREF=gi:16394200 /DB_XREF=AV310010 /CLONE=5730587J01 /FEA=EST /CNT=106 /TID=Mm.203950.1 /TIER=Stack /STK=91 /UG=Mm.203950 /LL=105788 /UG_GENE=AI195141 /UG_TITLE=expressed sequence AI195141
1416778_at	control	11.2744	7.0421	PPP-PPP	14473.4	1520.85	2055.27	1151.76	12843.9	15855.2	14721	3183.9	2100.2	881.7	Sdpr	serum deprivation response	1	1 C1.1	51233670	BE197945	20324	8241023, 8889548, 10349636, 11042159, 11076861, 11217851, 12466851, 12477932, 15475267, 16141072, 16141073	GO:0005829: cytosol, GO:0001786: phosphatidylserine binding, GO:0005515: protein binding, GO:0008289: lipid binding		gb:NM_138741.1 /DB_XREF=gi:20270266 /GEN=Sdpr /FEA=FLmRNA /CNT=150 /TID=Mm.220962.1 /TIER=FL+Stack /STK=70 /UG=Mm.220962 /LL=20324 /DEF=Mus musculus serum deprivation response (Sdpr), mRNA. /PROD=serum deprivation response /FL=gb:NM_138741.1 gb:BC027005.1 gb:BC020008.1
1456601_x_at	control	11.2669	60.749	PPP-AAA	500.17	75.4523	8.23	5.1013	518.3	564.9	417.3	13.4	8.1	3.2	Fxyd2	FXYD domain-containing ion transport regulator 2	9	9 B	45154132, 45150212, 45157071	AV002675	11936	8387529, 9396759, 9600999, 10349636, 10950925, 11042159, 11062458, 11076861, 11217851, 11526196, 12466851, 12477932, 15383396, 15572522, 15755730, 16141072, 16141073, 16403837, 16804105	GO:0006810: transport, GO:0006811: ion transport, GO:0006813: potassium ion transport, GO:0006814: sodium ion transport, GO:0016020: membrane, GO:0016021: integral to membrane, GO:0005216: ion channel activity, GO:0030955: potassium ion binding, GO:0031402: sodium ion binding		gb:AV002675 /DB_XREF=gi:4779525 /DB_XREF=AV002675 /CLONE=0610019I02 /FEA=EST /CNT=45 /TID=Mm.22742.5 /TIER=Stack /STK=8 /UG=Mm.22742 /LL=11936 /UG_GENE=Fxyd2 /UG_TITLE=FXYD domain-containing ion transport regulator 2
1456250_x_at	control	11.2499	6.249	PPP-PPP	3012.83	367.134	482.13	130.478	2703.4	2916.6	3418.5	493.6	606.5	346.3	Tgfbi	transforming growth factor, beta induced	13	13 38.0 cM	56619230	BB533460	21810	8024701, 10349636, 10913330, 10922068, 11042159, 11076861, 11217851, 11353389, 11598925, 12466851, 12704192, 12838408, 12963107, 14531791, 14967934, 15328023, 15604097, 15780949, 15907457, 16141072, 16141073, 16537572	GO:0007155: cell adhesion, GO:0005578: extracellular matrix (sensu Metazoa), GO:0005615: extracellular space, GO:0005615: extracellular space, GO:0005515: protein binding		gb:BB533460 /DB_XREF=gi:9585389 /DB_XREF=BB533460 /CLONE=E030030E06 /FEA=EST /CNT=13 /TID=Mm.14455.3 /TIER=Stack /STK=13 /UG=Mm.14455 /LL=21810 /UG_GENE=Tgfbi /UG_TITLE=transforming growth factor, beta induced, 68 kDa
1424289_at	control	11.2444	3.1952	PPP-PPP	923.93	43.4293	289.17	87.6033	875	938.9	957.9	389.6	249.4	228.5	Osgin2	oxidative stress induced growth inhibitor family member 2	4	4 A2	-15924267	BB817847	209212	10349636, 11042159, 11076861, 11217851, 12466851, 12477932, 15782199, 16141072, 16141073			gb:BC010311.1 /DB_XREF=gi:16307526 /FEA=FLmRNA /CNT=60 /TID=Mm.46455.1 /TIER=FL+Stack /STK=40 /UG=Mm.46455 /DEF=Mus musculus, Similar to chromosome 8 open reading frame 1, clone MGC:11786 IMAGE:3595088, mRNA, complete cds. /PROD=Similar to chromosome 8 open reading frame 1 /FL=gb:BC010311.1
1418295_s_at	control	11.2118	3.9964	PPP-PPP	3579.17	400.823	895.6	105.866	3457.6	4026.7	3253.2	917.2	780.6	989	Dgat1	diacylglycerol O-acyltransferase 1	15	15 D3	-76329269	BC003717	13350	9789033, 10349636, 10725249, 10802663, 10922068, 11042159, 11076861, 11111084, 11217851, 11805129, 11827942, 11880235, 11956242, 11959864, 12032764, 12077311, 12077321, 12130553, 12388146, 12407108, 12413942, 12466851, 12477932, 12782674, 14557275, 14668353, 14722362, 15161747, 15163627, 15181539, 15782199, 15797871, 15834126, 16141072, 16141073, 16306352, 16595853, 16894240, 16956609	GO:0005624: membrane fraction, GO:0005783: endoplasmic reticulum, GO:0016020: membrane, GO:0016021: integral to membrane, GO:0003846: 2-acylglycerol O-acyltransferase activity, GO:0004144: diacylglycerol O-acyltransferase activity, GO:0008415: acyltransferase activity, GO:0016740: transferase activity	00561: Glycerolipid metabolism	gb:BC003717.1 /DB_XREF=gi:13277613 /FEA=FLmRNA /CNT=58 /TID=Mm.22633.1 /TIER=FL+Stack /STK=26 /UG=Mm.22633 /LL=13350 /UG_GENE=Dgat1 /DEF=Mus musculus, diacylglycerol acyltransferase, clone MGC:5740 IMAGE:3486724, mRNA, complete cds. /PROD=diacylglycerol acyltransferase /FL=gb:AF078752.1 gb:BC003717.1 gb:NM_010046.1
1420387_at	control	11.1677	2.9707	PPP-PPP	2333.4	210.061	785.47	116.237	2443.1	2465.9	2091.2	815.7	883.6	657.1	Mpv17	Mpv17 transgene, kidney disease mutant	5	5 B1	-31417528	NM_008622	17527	1696177, 7564095, 7957077, 8281143, 9658163, 10233845, 10349636, 10673153, 10820170, 11042159, 11076861, 11217851, 11377883, 12466851, 12477932, 16141072, 16141073, 16582910, 16631601	GO:0006800: oxygen and reactive oxygen species metabolic process, GO:0007605: sensory perception of sound, GO:0007605: sensory perception of sound, GO:0005739: mitochondrion, GO:0005739: mitochondrion, GO:0005777: peroxisome, GO:0016020: membrane, GO:0016021: integral to membrane		gb:NM_008622.1 /DB_XREF=gi:6678925 /GEN=Mpv17 /FEA=FLmRNA /CNT=28 /TID=Mm.999.1 /TIER=FL /STK=5 /UG=Mm.999 /LL=17527 /DEF=Mus musculus Mpv17 transgene, kidney disease mutant (Mpv17), mRNA. /PROD=Mpv17 transgene, kidney disease mutant /FL=gb:M36411.1 gb:BC013452.1 gb:NM_008622.1
1457583_at	control	11.1613	3.6509	PPP-AAA	244	18.4163	66.83	20.4138	265	230.6	236.4	86.8	46	67.7	St6galnac3	ST6 (alpha-N-acetyl-neuraminyl-2,3-beta-galactosyl-1,3)-N-acetylgalactosaminide alpha-2,6-sialyltransferase 3	3	3 H4	-153139895	BM219171	20447	8889548, 10207017, 10349636, 10381338, 11042159, 11076861, 11125038, 11217851, 12466851, 12477932, 16141072, 16141073	GO:0006486: protein amino acid glycosylation, GO:0005615: extracellular space, GO:0016020: membrane, GO:0016021: integral to membrane, GO:0030173: integral to Golgi membrane, GO:0008373: sialyltransferase activity, GO:0016740: transferase activity, GO:0016757: transferase activity, transferring glycosyl groups	00604: Glycosphingolipid biosynthesis - ganglioseries, 01031: Glycan structures - biosynthesis 2	gb:BM219171 /DB_XREF=gi:17778902 /DB_XREF=C0921B06-3 /CLONE=C0921B06 /FEA=EST /CNT=4 /TID=Mm.217707.1 /TIER=ConsEnd /STK=4 /UG=Mm.217707 /UG_TITLE=ESTs
1454967_at	control	11.1379	1.966	PPP-PPP	1907.03	142.168	970	31.9676	1746.9	1955.8	2018.4	1000.7	972.4	936.9						BM246522					gb:BM246522 /DB_XREF=gi:17881792 /DB_XREF=K0739D01-3 /CLONE=K0739D01 /FEA=EST /CNT=37 /TID=Mm.52252.1 /TIER=Stack /STK=32 /UG=Mm.52252 /UG_TITLE=ESTs, Weakly similar to PGG2 RAT CHONDROITIN SULFATE PROTEOGLYCAN NG2 PRECURSOR (R.norvegicus)
1457632_s_at	control	11.127	12.9383	PPP-AAA	356.23	46.917	27.53	20.4148	335.1	323.6	410	44.3	33.5	4.8	Mrg1	myeloid ecotropic viral integration site-related gene 1	2	2 E4	-115554509	BB207647	17536	7649373, 8950991, 9049632, 9337137, 9337138, 10021349, 10349636, 10586884, 10654602, 10727869, 10842069, 11042159, 11044609, 11076861, 11101846, 11157778, 11217851, 11358480, 11412024, 11566859, 12117807, 12183364, 12193642, 12397630, 12441290, 12447396, 12466851, 12477932, 12571103, 12581525, 15030763, 15069081, 15465489, 15617687, 15618518, 15782199, 16141072, 16141073, 16672333, 16847320, 1691…	GO:0001654: eye development, GO:0006355: regulation of transcription, DNA-dependent, GO:0045449: regulation of transcription, GO:0005634: nucleus, GO:0003677: DNA binding, GO:0003700: transcription factor activity, GO:0043565: sequence-specific DNA binding		gb:BB207647 /DB_XREF=gi:8872600 /DB_XREF=BB207647 /CLONE=A430083I15 /FEA=EST /CNT=4 /TID=Mm.215008.1 /TIER=ConsEnd /STK=4 /UG=Mm.215008 /UG_TITLE=ESTs
1437871_at	control	11.1187	10.0303	PPP-AAA	253.77	24.2127	25.3	26.0847	260.5	273.9	226.9	9.3	55.4	11.2	Pgm5	phosphoglucomutase 5	19	19 B	-24745357	BG967597	226041	8889548, 10349636, 11042159, 11076861, 11217851, 12466851, 12477932, 16141072, 16141073	GO:0000902: cell morphogenesis, GO:0005975: carbohydrate metabolic process, GO:0005975: carbohydrate metabolic process, GO:0006508: proteolysis, GO:0007155: cell adhesion, GO:0005913: cell-cell adherens junction, GO:0004295: trypsin activity, GO:0005198: structural molecule activity, GO:0016868: intramolecular transferase activity, phosphotransferases, GO:0016868: intramolecular transferase activ…		gb:BG967597 /DB_XREF=gi:14355234 /DB_XREF=602833381F1 /CLONE=IMAGE:4987701 /FEA=EST /CNT=36 /TID=Mm.86380.1 /TIER=Stack /STK=13 /UG=Mm.86380 /UG_TITLE=ESTs, Highly similar to S62628 phosphoglucomutase-related protein - mouse (M.musculus)
1418417_at	control	11.0798	9.7552	PPP-AAA	220.47	25.2504	22.6	17.8653	220.3	195.3	245.8	19.8	6.3	41.7	Msc	musculin	1	1 A3	-14738559	NM_010827	17681	9767165, 9892671, 10198176, 10349636, 10922068, 11042159, 11076861, 11217851, 12466851, 12477932, 12493912, 15253936, 15385444, 15554945, 15967813, 16141072, 16141073, 16500621, 16638982	GO:0006350: transcription, GO:0006355: regulation of transcription, DNA-dependent, GO:0045449: regulation of transcription, GO:0005634: nucleus, GO:0003677: DNA binding, GO:0030528: transcription regulator activity		gb:NM_010827.1 /DB_XREF=gi:6754739 /GEN=Msc /FEA=FLmRNA /CNT=30 /TID=Mm.5820.1 /TIER=FL+Stack /STK=24 /UG=Mm.5820 /LL=17681 /DEF=Mus musculus musculin (Msc), mRNA. /PROD=musculin /FL=gb:NM_010827.1 gb:AF087035.1 gb:AF108216.1
1423878_at	control	11.0745	3.2349	PPP-PPP	409.53	29.1925	126.6	33.2555	384.5	402.5	441.6	132.2	156.7	90.9	Gypc	glycophorin C	18	18 B1	-32671331	BC027408	71683	10349636, 10542131, 11042159, 11076861, 11217851, 12466851, 12477932, 16141072, 16141073			gb:BC027408.1 /DB_XREF=gi:20072736 /FEA=FLmRNA /CNT=125 /TID=Mm.38774.1 /TIER=FL+Stack /STK=86 /UG=Mm.38774 /LL=71683 /UG_GENE=0610037F22Rik /DEF=Mus musculus, RIKEN cDNA 0610037F22 gene, clone MGC:37138 IMAGE:4952917, mRNA, complete cds. /PROD=RIKEN cDNA 0610037F22 gene /FL=gb:BC027408.1
1441870_s_at	control	11.0615	2.8819	PPP-PPP	2940.7	162.41	1020.4	253.054	2753.8	3047.5	3020.8	1221	736.1	1104.1	Pkd2	polycystic kidney disease 2	5	5 E5	104699855	BB249222	18764	8650545, 9263671, 9339380, 9568711, 9716661, 10193792, 10349636, 10547347, 10615132, 10655152, 10781953, 10873385, 10913159, 11042159, 11076861, 11217851, 11593033, 11854751, 11901144, 12007403, 12062060, 12062067, 12140187, 12239239, 12388382, 12466851, 12477932, 12514735, 12640140, 12840011, 12859898, 12874107, 12946628, 14600027, 14742446, 15226261, 15337773, 15782199, 15790956, 15858826, 1614…	GO:0006810: transport, GO:0006811: ion transport, GO:0006816: calcium ion transport, GO:0006874: calcium ion homeostasis, GO:0007050: cell cycle arrest, GO:0007259: JAK-STAT cascade, GO:0007368: determination of left/right symmetry, GO:0050974: detection of mechanical stimulus during sensory perception, GO:0005783: endoplasmic reticulum, GO:0005929: cilium, GO:0005932: basal body, GO:0005932: bas…		gb:BB249222 /DB_XREF=gi:8941968 /DB_XREF=BB249222 /CLONE=A730031L01 /FEA=EST /CNT=4 /TID=Mm.208298.1 /TIER=ConsEnd /STK=4 /UG=Mm.208298 /UG_TITLE=ESTs
1419185_a_at	control	11.0312	11.4169	PPP-AAA	1360.9	185.158	119.2	61.0492	1253.1	1574.7	1254.9	166.2	50.2	141.2	Mlxipl	MLX interacting protein-like	5	5 G2	135391539	AF245479	58805	8889548, 10349636, 10780788, 11013070, 11042159, 11076861, 11217851, 11230181, 11779826, 12466851, 12477932, 14742444, 14985368, 15100094, 15118080, 15496471, 15618518, 16141072, 16141073, 16184193, 16705063, 16873678, 16891625, 17107947	GO:0000122: negative regulation of transcription from RNA polymerase II promoter, GO:0006350: transcription, GO:0006355: regulation of transcription, DNA-dependent, GO:0045449: regulation of transcription, GO:0005634: nucleus, GO:0005667: transcription factor complex, GO:0003677: DNA binding, GO:0016564: transcriptional repressor activity, GO:0030528: transcription regulator activity		gb:AF245479.1 /DB_XREF=gi:13383357 /GEN=Mio /FEA=FLmRNA /CNT=30 /TID=Mm.34213.1 /TIER=FL+Stack /STK=12 /UG=Mm.34213 /LL=58805 /DEF=Mus musculus Mlx interactor kappa (Mio) mRNA, complete cds, alternatively spliced. /PROD=Mlx interactor kappa /FL=gb:NM_021455.1 gb:AF156604.1 gb:AF245479.1 gb:AF245475.1 gb:AF245478.1 gb:AF245476.1
1435109_at	control	11.0291	1.8668	APP-AAA	207.83	6.3217	111.33	13.7733	200.6	210.6	212.3	107.2	100.1	126.7	Tmem175	transmembrane protein 175	5	5 F	108870303	AW123256	72392	10349636, 11042159, 11076861, 11217851, 12466851, 12477932, 16141072, 16141073	GO:0016021: integral to membrane, GO:0016301: kinase activity		gb:AW123256 /DB_XREF=gi:6098751 /DB_XREF=UI-M-BH2.1-apg-a-11-0-UI.s1 /CLONE=UI-M-BH2.1-apg-a-11-0-UI /FEA=EST /CNT=23 /TID=Mm.35007.1 /TIER=Stack /STK=20 /UG=Mm.35007 /UG_TITLE=ESTs
1419097_a_at	control	11.021	4.7547	PPP-PPP	1267.6	147.143	266.6	55.6553	1183.9	1437.5	1181.4	308.7	287.6	203.5	Stom	stomatin	2	2 B-C1	-35135999	AF093620	13830	7540886, 7774911, 8075499, 8088777, 8786142, 8921901, 10090952, 10349636, 10383825, 11042159, 11076861, 11217851, 11287341, 12466851, 12477932, 15471860, 15475267, 16141072, 16141073, 17082620	GO:0051260: protein homooligomerization, GO:0005856: cytoskeleton, GO:0005887: integral to plasma membrane, GO:0016020: membrane, GO:0016021: integral to membrane, GO:0045121: lipid raft		gb:NM_013515.1 /DB_XREF=gi:7710017 /GEN=Epb7.2 /FEA=FLmRNA /CNT=55 /TID=Mm.4441.1 /TIER=FL+Stack /STK=13 /UG=Mm.4441 /LL=13830 /DEF=Mus musculus erythrocyte protein band 7.2 (Epb7.2), mRNA. /PROD=erythrocyte protein band 7.2 /FL=gb:U17297.1 gb:AF093620.1 gb:NM_013515.1
1427025_at	control	11.0179	4.7736	PPP-PAP	423.73	39.3602	88.77	34.9806	384.9	463.6	422.7	100.2	116.6	49.5	Mtmr7	myotubularin related protein 7	8	8 B1.2	-42048976	AV094609	54384	9736772, 10349636, 10922068, 11042159, 11076861, 11217851, 12466851, 12477932, 12890864, 16141072, 16141073, 16705022	GO:0006470: protein amino acid dephosphorylation, GO:0046839: phospholipid dephosphorylation, GO:0005624: membrane fraction, GO:0005829: cytosol, GO:0003779: actin binding, GO:0004437: inositol or phosphatidylinositol phosphatase activity, GO:0004721: phosphoprotein phosphatase activity, GO:0005515: protein binding, GO:0016787: hydrolase activity	00051: Fructose and mannose metabolism, 00530: Aminosugars metabolism, 00730: Thiamine metabolism, 00740: Riboflavin metabolism, 00760: Nicotinate and nicotinamide metabolism	gb:AV094609 /DB_XREF=gi:16381629 /DB_XREF=AV094609 /CLONE=2410001O12 /FEA=mRNA /CNT=44 /TID=Mm.20253.1 /TIER=Stack /STK=24 /UG=Mm.20253 /LL=54384 /UG_GENE=Mtmr7 /UG_TITLE=myotubularin related protein 7
1434500_at	control	10.9902	3.8701	PPP-PAP	548.4	45.5826	141.7	45.0614	514	600.1	531.1	176.5	90.8	157.8	Ttyh2	tweety homolog 2 (Drosophila)	11	11 E2	114491557	BF585303	117160	8889548, 10349636, 11042159, 11076861, 11217851, 11597145, 12466851, 12477932, 15226823, 15782199, 16141072, 16141073	GO:0008150: biological_process, GO:0016021: integral to membrane, GO:0016021: integral to membrane, GO:0003674: molecular_function		gb:BF585303 /DB_XREF=gi:11658931 /DB_XREF=602101969F2 /CLONE=IMAGE:4225241 /FEA=EST /CNT=37 /TID=Mm.41871.2 /TIER=Stack /STK=31 /UG=Mm.41871 /LL=117160 /UG_GENE=Ttyh2 /UG_TITLE=tweety homolog 2 (Drosophila)
1435592_at	control	10.9866	1.4456	APP-PMA	152.27	5.5717	105.33	4.8686	147	158.1	151.7	99.9	109.3	106.8	Eif5b	eukaryotic translation initiation factor 5B	1	1 B	37942555	BB149997	226982	10349636, 10922068, 11042159, 11076861, 11217851, 12426392, 12466851, 12477932, 15368895, 16141072, 16141073	GO:0006412: translation, GO:0000166: nucleotide binding, GO:0003743: translation initiation factor activity, GO:0003924: GTPase activity, GO:0005525: GTP binding		gb:BB149997 /DB_XREF=gi:16267861 /DB_XREF=BB149997 /CLONE=A030003E17 /FEA=EST /CNT=19 /TID=Mm.154309.3 /TIER=Stack /STK=15 /UG=Mm.154309 /LL=56210 /UG_GENE=Rev1l /UG_TITLE=REV1-like (S. cerevisiae)
1425362_at	control	10.9678	5.4455	PPP-PPP	599.73	72.3992	110.13	27.1384	681.8	544.9	572.5	139.4	85.8	105.2	Hrbl	HIV-1 Rev binding protein-like	5	5 G2	-137880643, -137892612	BC003330	231801	10349636, 10922068, 11042159, 11076861, 11217851, 12466851, 12477932, 16141072, 16141073	GO:0043087: regulation of GTPase activity, GO:0008270: zinc ion binding, GO:0046872: metal ion binding		gb:BC003330.1 /DB_XREF=gi:13097107 /FEA=FLmRNA /CNT=16 /TID=Mm.35097.1 /TIER=FL /STK=2 /UG=Mm.35097 /DEF=Mus musculus, Similar to RevRex activation domain binding protein-related, clone MGC:7148 IMAGE:3256586, mRNA, complete cds. /PROD=Similar to RevRex activation domain bindingprotein-related /FL=gb:BC003330.1
1459947_at	control	10.955	3.1963	PPP-PPP	365.77	31.7541	114.43	23.8902	398.9	335.6	362.8	94	140.7	108.6	Bmp6	bone morphogenetic protein 6	13	13 A3.3	38353181	BB007036	12161	1427904, 1460021, 1715687, 1893873, 1970330, 2481605, 2734307, 7515504, 7547504, 7589793, 7605753, 7789972, 7979162, 8050356, 8089189, 8211130, 8287471, 8808404, 8858176, 8889548, 9027500, 9056639, 9069123, 9152011, 9187146, 9321480, 9415424, 9486541, 9584130, 9603738, 9664685, 9808626, 9811942, 9832456, 9892740, 10072431, 10213384, 10349636, 10462412, 10495271, 10498273, 10687846, 10693795, 1069…	GO:0001503: ossification, GO:0001649: osteoblast differentiation, GO:0006954: inflammatory response, GO:0007275: multicellular organismal development, GO:0030154: cell differentiation, GO:0030509: BMP signaling pathway, GO:0040007: growth, GO:0045944: positive regulation of transcription from RNA polymerase II promoter, GO:0051216: cartilage development, GO:0005576: extracellular region, GO:00056…	04340: Hedgehog signaling pathway, 04350: TGF-beta signaling pathway	gb:BB007036 /DB_XREF=gi:16257039 /DB_XREF=BB007036 /CLONE=4732474G23 /FEA=EST /CNT=2 /TID=Mm.106577.1 /TIER=ConsEnd /STK=2 /UG=Mm.106577 /UG_TITLE=ESTs
1456887_at	control	10.9425	12.079	PPP-AAA	713.87	100.278	59.1	26.1863	769.7	598.1	773.8	72.9	75.5	28.9	Cmklr1	chemokine-like receptor 1	5	5 F	-113873359	AW228687	14747	9144535, 10349636, 11042159, 11076861, 11217851, 12466851, 12477932, 15019996, 15792532, 16141072, 16141073, 16863918	GO:0006935: chemotaxis, GO:0007165: signal transduction, GO:0007186: G-protein coupled receptor protein signaling pathway, GO:0005887: integral to plasma membrane, GO:0016020: membrane, GO:0016021: integral to membrane, GO:0001584: rhodopsin-like receptor activity, GO:0004871: signal transducer activity, GO:0004872: receptor activity, GO:0004930: G-protein coupled receptor activity, GO:0004930: G…		gb:AW228687 /DB_XREF=gi:6557983 /DB_XREF=up19c06.x1 /CLONE=IMAGE:2654794 /FEA=EST /CNT=10 /TID=Mm.59898.1 /TIER=ConsEnd /STK=6 /UG=Mm.59898 /UG_TITLE=ESTs, Highly similar to JC5498 G protein-coupled receptor DEZ - mouse (M.musculus)
1423488_at	control	10.9393	19.8934	PPP-PPP	19969.7	2979.46	1003.83	374.606	18265.2	23410	18233.8	1238.3	1201.4	571.8	Mmd	monocyte to macrophage differentiation-associated	11	11 C	90065565	BC021914	67468	8889548, 10349636, 11042159, 11076861, 11217851, 12466851, 12477932, 15226823, 15475267, 15782199, 16141072, 16141073	GO:0019835: cytolysis, GO:0016020: membrane, GO:0016021: integral to membrane, GO:0004872: receptor activity		gb:AK011418.1 /DB_XREF=gi:12847528 /FEA=FLmRNA /CNT=142 /TID=Mm.38791.1 /TIER=Stack /STK=15 /UG=Mm.38791 /LL=67468 /UG_GENE=Mmd /UG_TITLE=monocyte to macrophage differentiation-associated /DEF=Mus musculus 10 days embryo whole body cDNA, RIKEN full-length enriched library, clone:2610016F14:homolog to MONOCYTE TO MACROPHAGE DIFFERENTIATION PROTEIN, full insert sequence. /FL=gb:NM_026178.1 gb:BC021…
1419228_at	control	10.9205	1.6783	PPP-PPP	298.8	14.4024	178.03	12.6275	301.9	283.1	311.4	164.5	180.1	189.5	Elac1	elaC homolog 1 (E. coli)	18		-73860407	NM_028983	114615	10349636, 11042159, 11076861, 11175785, 11217851, 12466851, 12477932, 16141072, 16141073	GO:0008033: tRNA processing, GO:0005634: nucleus, GO:0004518: nuclease activity, GO:0004519: endonuclease activity, GO:0008270: zinc ion binding, GO:0016787: hydrolase activity, GO:0046872: metal ion binding		gb:NM_028983.1 /DB_XREF=gi:13386363 /GEN=8430417G19Rik /FEA=FLmRNA /CNT=15 /TID=Mm.96408.1 /TIER=FL+Stack /STK=12 /UG=Mm.96408 /LL=74527 /DEF=Mus musculus RIKEN cDNA 8430417G19 gene (8430417G19Rik), mRNA. /PROD=RIKEN cDNA 8430417G19 /FL=gb:NM_028983.1
1453571_at	control	10.9134	5.3025	PPP-PPP	4206.5	494.529	793.3	221.106	4418.6	4559.6	3641.3	855.7	976.5	547.7	Depdc6	DEP domain containing 6	15	15 D1	54942565, 54963518	BB324973	97998	10349636, 10725249, 11042159, 11076861, 11217851, 11285235, 12466851, 12477932, 15782199, 16141072, 16141073	GO:0007242: intracellular signaling cascade, GO:0005515: protein binding		gb:BB324973 /DB_XREF=gi:16403539 /DB_XREF=BB324973 /CLONE=B430113B11 /FEA=mRNA /CNT=24 /TID=Mm.116736.2 /TIER=ConsEnd /STK=1 /UG=Mm.116736 /LL=67982 /UG_GENE=9030416F12Rik /UG_TITLE=RIKEN cDNA 9030416F12 gene
1434150_a_at	control	10.8718	20.9375	PPP-PPP	2378.5	360.093	113.6	23.1294	2212.1	2131.7	2791.7	87.2	130.3	123.3	Mettl7a	methyltransferase like 7A	15	15 F3	100132850	AV171622	70152	10349636, 11042159, 11076861, 11217851, 12466851, 12477932, 16141072, 16141073	GO:0008168: methyltransferase activity, GO:0016740: transferase activity		gb:AV171622 /DB_XREF=gi:16383588 /DB_XREF=AV171622 /CLONE=3300001H21 /FEA=EST /CNT=117 /TID=Mm.220975.2 /TIER=Stack /STK=40 /UG=Mm.220975 /LL=70152 /UG_GENE=2210414H16Rik /UG_TITLE=RIKEN cDNA 2210414H16 gene
1452296_at	control	10.8647	54.1243	PPP-AAA	638.67	99.7551	11.8	5.9908	524.5	682.5	709	18.6	7.3	9.5	Slit3	slit homolog 3 (Drosophila)	11		34964880	BM570006	20564	8889548, 10102269, 10349621, 10349636, 10433822, 10864954, 10864955, 11042159, 11044609, 11076861, 11217851, 11520671, 11748150, 12141424, 12466851, 12609596, 12702769, 12954717, 14550534, 14621295, 15091338, 15162513, 15226823, 15511637, 16141072, 16141073, 16284245, 16291793, 16439476, 16715082	GO:0007275: multicellular organismal development, GO:0007399: nervous system development, GO:0007411: axon guidance, GO:0009887: organ morphogenesis, GO:0009887: organ morphogenesis, GO:0030154: cell differentiation, GO:0005615: extracellular space, GO:0005102: receptor binding, GO:0005509: calcium ion binding, GO:0005515: protein binding	04360: Axon guidance	gb:BM570006 /DB_XREF=gi:18851978 /DB_XREF=ii07a04.x1 /CLONE=IMAGE:5940774 /FEA=mRNA /CNT=76 /TID=Mm.28509.1 /TIER=Stack /STK=18 /UG=Mm.28509 /LL=20564 /UG_GENE=Slit3 /UG_TITLE=slit homolog 3 (Drosophila)
1428336_at	control	10.8464	3.1158	AAM-AAA	393.63	30.3451	126.33	30.0194	421.8	361.5	397.6	144.9	142.4	91.7	Agpat4	1-acylglycerol-3-phosphate O-acyltransferase 4 (lysophosphatidic acid acyltransferase, delta)	17	17 A2	11962641	AK005139	68262	10349636, 11042159, 11076861, 11217851, 12466851, 12477932, 16141072, 16141073	GO:0006644: phospholipid metabolic process, GO:0008152: metabolic process, GO:0008654: phospholipid biosynthetic process, GO:0016020: membrane, GO:0016021: integral to membrane, GO:0003841: 1-acylglycerol-3-phosphate O-acyltransferase activity, GO:0008415: acyltransferase activity, GO:0016740: transferase activity	00561: Glycerolipid metabolism, 00564: Glycerophospholipid metabolism, 00565: Ether lipid metabolism	gb:AK005139.1 /DB_XREF=gi:12836855 /GEN=Agpat4 /FEA=mRNA /CNT=77 /TID=Mm.27760.1 /TIER=Stack /STK=52 /UG=Mm.27760 /LL=68262 /UG_TITLE=1-acylglycerol-3-phosphate O-acyltransferase 1 (lysophosphatidic acid acyltransferase, delta) /DEF=Mus musculus adult male cerebellum cDNA, RIKEN full-length enriched library, clone:1500003P24:1-acylglycerol-3-phosphate O-acyltransferase 1 (lysophosphatidic acid ac…
1434555_at	control	10.8459	2.1677	PPP-PPP	2006.93	105.252	925.83	136.856	2126.9	1930.1	1963.8	958.5	1043.4	775.6	Anp32a	acidic (leucine-rich) nuclear phosphoprotein 32 family, member A	9	9 B	62139433	BG073527	11737	8889548, 8970164, 9353121, 10349636, 10657254, 11042159, 11076861, 11217851, 11486040, 11830591, 12063408, 12466851, 12477932, 12807913, 15060138, 15895553, 16141072, 16141073	GO:0005634: nucleus, GO:0016363: nuclear matrix, GO:0005515: protein binding		gb:BG073527 /DB_XREF=gi:12556096 /DB_XREF=H3123F08-3 /CLONE=H3123F08 /FEA=EST /CNT=40 /TID=Mm.22717.1 /TIER=Stack /STK=29 /UG=Mm.22717 /LL=97582 /UG_GENE=W91701 /UG_TITLE=expressed sequence W91701
1449322_at	control	10.8303	4.0745	PPP-PPP	11047.9	1236.61	2711.47	498.256	10502.6	12463.4	10177.6	2959.2	3037.3	2137.9	Ptp4a1	protein tyrosine phosphatase 4a1	1	1 B	-30884848	BC003761	19243	8196618, 9514946, 10194868, 10349636, 10725249, 10922068, 10934024, 11042159, 11076861, 11217851, 12466851, 12477932, 12782572, 15226823, 15782199, 16141072, 16141073	GO:0006470: protein amino acid dephosphorylation, GO:0007049: cell cycle, GO:0007275: multicellular organismal development, GO:0030335: positive regulation of cell migration, GO:0005768: endosome, GO:0005783: endoplasmic reticulum, GO:0005886: plasma membrane, GO:0016020: membrane, GO:0004721: phosphoprotein phosphatase activity, GO:0004725: protein tyrosine phosphatase activity, GO:0004727: pren…		gb:BC003761.1 /DB_XREF=gi:13277725 /FEA=FLmRNA /CNT=307 /TID=Mm.28909.1 /TIER=FL+Stack /STK=14 /UG=Mm.28909 /LL=19243 /UG_GENE=Ptp4a1 /DEF=Mus musculus, protein tyrosine phosphatase type IVA, member 1, clone MGC:5901 IMAGE:3590144, mRNA, complete cds. /PROD=protein tyrosine phosphatase type IVA, member 1 /FL=gb:U84411.1 gb:NM_011200.1 gb:BC003761.1
1417663_a_at	control	10.8266	1.8089	PPP-PPP	721.27	28.4009	398.73	43.0797	721	749.8	693	445.3	360.3	390.6	Ndrg3	N-myc downstream regulated gene 3	2	2 H1	-156618787	BE631549	29812	8889548, 10349636, 10581191, 10922068, 11042159, 11076861, 11217851, 11406283, 11936845, 12466851, 12477932, 15618518, 15769905, 15782199, 16141072, 16141073	GO:0007283: spermatogenesis, GO:0030154: cell differentiation, GO:0030154: cell differentiation, GO:0030308: negative regulation of cell growth, GO:0005737: cytoplasm, GO:0003674: molecular_function		gb:NM_013865.1 /DB_XREF=gi:7305306 /GEN=Ndr3 /FEA=FLmRNA /CNT=147 /TID=Mm.36775.1 /TIER=FL+Stack /STK=39 /UG=Mm.36775 /LL=29812 /DEF=Mus musculus N-myc downstream regulated 3 (Ndr3), mRNA. /PROD=N-myc downstream regulated 3 /FL=gb:AB033922.1 gb:NM_013865.1
1433467_at	control	10.814	3.3468	PPP-PAP	542.97	33.7583	162.23	50.7844	569.6	554.3	505	218.7	120.3	147.7	Slc7a6	solute carrier family 7 (cationic amino acid transporter, y+ system), member 6	8	8 D3	109058003	BB547620	330836	10349636, 11042159, 11076861, 11217851, 12466851, 12477932, 14621295, 15537664, 15782199, 16141072, 16141073	GO:0006810: transport, GO:0006865: amino acid transport, GO:0016020: membrane, GO:0005279: amino acid-polyamine transporter activity		gb:BB409881 /DB_XREF=gi:15411959 /DB_XREF=BB409881 /CLONE=C430015N23 /FEA=EST /CNT=260 /TID=Mm.46749.1 /TIER=Stack /STK=51 /UG=Mm.46749 /LL=102129 /UG_GENE=AI643885 /UG_TITLE=expressed sequence AI643885
1435580_at	control	10.8011	3.1967	PPP-PAM	1797.83	180.256	562.4	82.1993	1971.2	1810.9	1611.4	652.5	491.5	543.2	C230081A13Rik	RIKEN cDNA C230081A13 gene	9	9 B	-56025845	AW553275	244895	10349636, 10922068, 11042159, 11076861, 11217851, 11544199, 12466851, 12477932, 15368895, 16141072, 16141073	GO:0006468: protein amino acid phosphorylation, GO:0000166: nucleotide binding, GO:0004713: protein-tyrosine kinase activity, GO:0005524: ATP binding, GO:0016301: kinase activity, GO:0016740: transferase activity		gb:AW553275 /DB_XREF=gi:7198698 /DB_XREF=L0224G07-3 /CLONE=L0224G07 /FEA=EST /CNT=21 /TID=Mm.34783.1 /TIER=Stack /STK=15 /UG=Mm.34783 /LL=102426 /UG_GENE=AA690169 /UG_TITLE=expressed sequence AA690169
1425528_at	control	10.7717	7.8013	PPP-PPP	2296.43	288.876	294.37	142.08	2615	2222.8	2051.5	420.6	322	140.5	Prrx1	paired related homeobox 1	1	1 H2.1	-165081794, -165091951	L06502	18933	1360403, 1383943, 7554933, 7577675, 7592824, 7758948, 7910581, 7964557, 8075499, 8889548, 9053326, 9205120, 9636074, 9671575, 9729491, 9786416, 9817598, 9876178, 9882503, 10349636, 10354604, 10499585, 10625532, 10664157, 10748458, 10804186, 10976045, 11042159, 11044607, 11063257, 11076861, 11217851, 11520673, 11532916, 11685458, 11747080, 11748565, 12114523, 12163022, 12193642, 12351180, 12414734…	GO:0006355: regulation of transcription, DNA-dependent, GO:0007275: multicellular organismal development, GO:0045449: regulation of transcription, GO:0005634: nucleus, GO:0005667: transcription factor complex, GO:0003677: DNA binding, GO:0003700: transcription factor activity, GO:0043565: sequence-specific DNA binding		gb:BQ175427 /DB_XREF=gi:20350919 /DB_XREF=UI-M-DJ2-bwc-f-24-0-UI.s1 /CLONE=UI-M-DJ2-bwc-f-24-0-UI /FEA=FLmRNA /CNT=86 /TID=Mm.3869.2 /TIER=Stack /STK=24 /UG=Mm.3869 /LL=18933 /UG_GENE=Prrx1 /UG_TITLE=paired related homeobox 1 /FL=gb:L06502.1 gb:U03873.1
1457851_at	control	10.7597	5.4682	PPP-PPP	327	42.3264	59.8	7.6544	362.6	280.2	338.2	51.1	65.5	62.8	Slc16a10	solute carrier family 16 (monocarboxylic acid transporters), member 10	10	10 B1	-39765178	BG066654	72472	10349636, 11042159, 11076861, 11125038, 11217851, 12466851, 12477932, 16141072, 16141073, 16245314	GO:0006810: transport, GO:0016020: membrane, GO:0016021: integral to membrane, GO:0005215: transporter activity		gb:BG066654 /DB_XREF=gi:12549146 /DB_XREF=H3044E10-3 /CLONE=H3044E10 /FEA=EST /CNT=4 /TID=Mm.154707.1 /TIER=ConsEnd /STK=3 /UG=Mm.154707 /LL=52015 /UG_GENE=D10Ertd276e /UG_TITLE=DNA segment, Chr 10, ERATO Doi 276, expressed
1415850_at	control	10.7339	4.2837	PPP-PPA	1892.23	150.497	441.73	179.258	2063.5	1832.1	1781.1	618.3	447	259.9	Rasa3	RAS p21 protein activator 3	8	8 A1.1	-13567194	NM_009025	19414	7500386, 10349636, 10725249, 10922068, 11042159, 11076861, 11217851, 12466851, 12477932, 15226823, 15686869, 15782199, 16141072, 16141073, 16829211	GO:0007242: intracellular signaling cascade, GO:0051056: regulation of small GTPase mediated signal transduction, GO:0005622: intracellular, GO:0005096: GTPase activator activity, GO:0008270: zinc ion binding, GO:0046872: metal ion binding		gb:NM_009025.1 /DB_XREF=gi:7110712 /GEN=Rasa3 /FEA=FLmRNA /CNT=276 /TID=Mm.18517.1 /TIER=FL+Stack /STK=203 /UG=Mm.18517 /LL=19414 /DEF=Mus musculus RAS p21 protein activator 3 (Rasa3), mRNA. /PROD=RAS p21 protein activator 3 /FL=gb:NM_009025.1 gb:U20238.1
1417104_at	control	10.7308	4.7021	PPP-PPA	840.1	91.9983	178.67	54.1701	945.4	799.6	775.3	229.8	184.3	121.9	Emp3	epithelial membrane protein 3	7	7 B3	-45786105	BC001999	13732	8996089, 9204931, 9615230, 10349636, 11042159, 11076861, 11217851, 12466851, 12477932, 12845499, 16141072, 16141073	GO:0016049: cell growth, GO:0016020: membrane, GO:0016021: integral to membrane		gb:BC001999.1 /DB_XREF=gi:12805084 /FEA=FLmRNA /CNT=103 /TID=Mm.20829.1 /TIER=FL+Stack /STK=56 /UG=Mm.20829 /LL=13732 /UG_GENE=Emp3 /DEF=Mus musculus, epithelial membrane protein 3, clone MGC:5759 IMAGE:3485948, mRNA, complete cds. /PROD=epithelial membrane protein 3 /FL=gb:AF011750.1 gb:BC001999.1 gb:NM_010129.1 gb:U87948.1
1448864_at	control	10.7201	5.2309	PPP-PPP	5512.17	658.937	1053.77	291.031	5272	5007	6257.5	1388	856.4	916.9	Snrk	SNF related kinase	9	9 F4	121980599	NM_133741	20623	8889548, 9371744, 9927192, 10198162, 10349636, 10922068, 11042159, 11076861, 11217851, 12234663, 12466851, 12477932, 14621295, 15226823, 15582152, 15782199, 16141072, 16141073	GO:0006468: protein amino acid phosphorylation, GO:0006468: protein amino acid phosphorylation, GO:0030099: myeloid cell differentiation, GO:0043523: regulation of neuron apoptosis, GO:0005634: nucleus, GO:0005634: nucleus, GO:0000166: nucleotide binding, GO:0000287: magnesium ion binding, GO:0000287: magnesium ion binding, GO:0004672: protein kinase activity, GO:0004674: protein serine/threonine…		gb:NM_133741.1 /DB_XREF=gi:19526941 /GEN=Snrk /FEA=FLmRNA /CNT=196 /TID=Mm.200461.1 /TIER=FL+Stack /STK=34 /UG=Mm.200461 /LL=20623 /DEF=Mus musculus SNF related kinase (Snrk), mRNA. /PROD=SNF related kinase /FL=gb:AF387809.2 gb:NM_133741.1
1435196_at	control	10.7146	40.8456	PPP-AAA	1313.87	206.052	32.17	21.6909	1519.4	1107.3	1314.9	36.9	51.1	8.5	Ntrk2	neurotrophic tyrosine kinase, receptor, type 2	13	13 B1	58817455, 58816218	BB795585	18212	1327010, 1645620, 1751544, 2160854, 2171894, 2555172, 7582115, 7588071, 7746324, 7991545, 8114702, 8187631, 8223273, 8402890, 8530078, 8575307, 8662221, 8815902, 8889548, 8898237, 8918886, 8938453, 8955272, 8978665, 8994044, 9133385, 9141083, 9148911, 9184113, 9232598, 9263033, 9331334, 9364058, 9398452, 9421165, 9472042, 9640332, 9728914, 9728915, 9731539, 9736654, 9881298, 9973328, 10207144, 10…	GO:0001570: vasculogenesis, GO:0006468: protein amino acid phosphorylation, GO:0007169: transmembrane receptor protein tyrosine kinase signaling pathway, GO:0007275: multicellular organismal development, GO:0007399: nervous system development, GO:0007631: feeding behavior, GO:0014047: glutamate secretion, GO:0019222: regulation of metabolic process, GO:0030154: cell differentiation, GO:0042490: m…	04010: MAPK signaling pathway	gb:BB795585 /DB_XREF=gi:16965204 /DB_XREF=BB795585 /CLONE=G431005L04 /FEA=EST /CNT=30 /TID=Mm.37885.1 /TIER=Stack /STK=19 /UG=Mm.37885 /UG_TITLE=ESTs
1454674_at	control	10.7079	9.4843	AAP-AAA	160.6	17.4846	16.93	15.308	144.5	158.1	179.2	34.6	8.6	7.6	Fez1	fasciculation and elongation protein zeta 1 (zygin I)	9	9 A4	36582486	AU067669	235180	10349636, 10922068, 11042159, 11076861, 11217851, 12466851, 12477932, 14697253, 15579145, 15649943, 16141072, 16141073	GO:0005737: cytoplasm, GO:0005813: centrosome, GO:0005515: protein binding, GO:0043015: gamma-tubulin binding		gb:AU067669 /DB_XREF=gi:4968406 /DB_XREF=AU067669 /CLONE=MNCb-0291 /FEA=EST /CNT=98 /TID=Mm.5264.1 /TIER=Stack /STK=77 /UG=Mm.5264 /UG_TITLE=ESTs, Highly similar to FEZ1_RAT FASCICULATION AND ELONGATION PROTEIN ZETA 1 (ZYGIN I) (R.norvegicus)
1450206_at	control	10.6901	10.1201	PPP-AAA	199.37	28.4282	19.7	6.2642	201.8	169.8	226.5	26.9	16.7	15.5	Dlc1	deleted in liver cancer 1	8	8 A4-B2	-38036262	NM_015802	50768	8889548, 10349636, 10702663, 11042159, 11076861, 11217851, 12034501, 12466851, 12477932, 15710412, 16141072, 16141073	GO:0007010: cytoskeleton organization and biogenesis, GO:0007165: signal transduction, GO:0007266: Rho protein signal transduction, GO:0030155: regulation of cell adhesion, GO:0030308: negative regulation of cell growth, GO:0005622: intracellular, GO:0005634: nucleus, GO:0005737: cytoplasm, GO:0003677: DNA binding, GO:0005096: GTPase activator activity, GO:0005100: Rho GTPase activator activity, …		gb:NM_015802.1 /DB_XREF=gi:7656901 /GEN=Arhgap7 /FEA=FLmRNA /CNT=13 /TID=Mm.103700.1 /TIER=FL /STK=2 /UG=Mm.103700 /LL=50768 /DEF=Mus musculus Rho GTPase activating protein 7 (Arhgap7), mRNA. /PROD=Rho GTPase activating protein 7 /FL=gb:NM_015802.1 gb:AF178078.1
1446069_at	control	10.6809	10.5257	PPP-AAA	334.37	43.5041	31.77	22.7007	285	351	367.1	55.6	10.4	29.3	Ablim3	actin binding LIM protein family, member 3	18	18 E1	-61924763	BB667786	319713	10349636, 11042159, 11076861, 11217851, 12466851, 12477932, 15368895, 16141072, 16141073	GO:0007010: cytoskeleton organization and biogenesis, GO:0003779: actin binding, GO:0008270: zinc ion binding, GO:0046872: metal ion binding	04360: Axon guidance	gb:BB667786 /DB_XREF=gi:16399235 /DB_XREF=BB667786 /CLONE=C730040N13 /FEA=EST /CNT=2 /TID=Mm.208537.1 /TIER=ConsEnd /STK=2 /UG=Mm.208537 /UG_TITLE=ESTs
1415812_at	control	10.6748	43.7354	PPP-PPP	34170.5	5398.29	781.3	456.851	40094.7	32887.5	29529.3	879.9	1180.8	283.2	Gsn	gelsolin	2	2 B	35104448	NM_010354	227753	1315305, 2546951, 7698245, 7720072, 7774911, 8075499, 8088777, 8799160, 9811942, 9819354, 9927495, 10024874, 10349636, 10417819, 10431814, 10556799, 10559185, 10684249, 10922068, 10946270, 10985859, 11042159, 11076861, 11130978, 11217851, 11423996, 11514591, 12270712, 12466851, 12477932, 12578912, 12654637, 14617805, 14962741, 15294161, 15671163, 15782199, 16059910, 16120646, 16141072, 16141073, …	GO:0016192: vesicle-mediated transport, GO:0030041: actin filament polymerization, GO:0051014: actin filament severing, GO:0051014: actin filament severing, GO:0051016: barbed-end actin filament capping, GO:0051016: barbed-end actin filament capping, GO:0005576: extracellular region, GO:0005615: extracellular space, GO:0005737: cytoplasm, GO:0005829: cytosol, GO:0005856: cytoskeleton, GO:0015629:…	04810: Regulation of actin cytoskeleton	gb:NM_010354.1 /DB_XREF=gi:6754077 /GEN=Gsn /FEA=FLmRNA /CNT=415 /TID=Mm.21109.1 /TIER=FL+Stack /STK=239 /UG=Mm.21109 /LL=14851 /DEF=Mus musculus gelsolin (Gsn), mRNA. /PROD=gelsolin /FL=gb:NM_010354.1 gb:BC023143.1 gb:J04953.1
1429028_at	control	10.6575	10.3455	PPP-PPP	3705.77	508.828	358.2	192.559	4173.4	3163.9	3780	391.4	532	151.2	Dock11	dedicator of cytokinesis 11	X	X A3.1-A3.2	32320276	AK017170	75974	10349636, 11042159, 11076861, 11125038, 11217851, 12466851, 15710388, 16141072, 16141073	GO:0006355: regulation of transcription, DNA-dependent, GO:0005634: nucleus, GO:0003700: transcription factor activity, GO:0003707: steroid hormone receptor activity, GO:0005085: guanyl-nucleotide exchange factor activity, GO:0005089: Rho guanyl-nucleotide exchange factor activity, GO:0005525: GTP binding, GO:0017048: Rho GTPase binding, GO:0051020: GTPase binding		gb:AK017170.1 /DB_XREF=gi:12856284 /FEA=mRNA /CNT=24 /TID=Mm.32873.1 /TIER=Stack /STK=14 /UG=Mm.32873 /LL=75974 /UG_GENE=5033414A21Rik /UG_TITLE=RIKEN cDNA 5033414A21 gene /DEF=Mus musculus 11 days pregnant adult female ovary and uterus cDNA, RIKEN full-length enriched library, clone:5033414A21:homolog to CDNA FLJ10391 FIS, CLONE NT2RM4000139, MODERATELY SIMILAR TO R.NORVEGICUS TRG MRNA, full ins…
1451718_at	control	10.6192	3.0643	PPP-PPP	379.87	39.69	123.97	12.9156	369.2	346.6	423.8	124.7	110.7	136.5	Plp1	proteolipid protein (myelin) 1	X	X F1-F2	132169199	BB768495	18823	599283, 971429, 1150661, 1206429, 1280107, 1280689, 1280692, 1333116, 1353738, 1374119, 1375190, 1377711, 1380672, 1396170, 1549575, 1565842, 1675194, 1679744, 1688931, 1694232, 1705211, 1706246, 1721567, 1723945, 1737990, 1794058, 1890702, 1944806, 2076671, 2230077, 2230805, 2364893, 2411865, 2425262, 2441390, 2442307, 2444462, 2444499, 2445921, 2449535, 2451027, 2579194, 2670252, 2721933, 28995…	GO:0007268: synaptic transmission, GO:0008366: axon ensheathment, GO:0008366: axon ensheathment, GO:0022010: myelination in the central nervous system, GO:0042552: myelination, GO:0042552: myelination, GO:0042759: long-chain fatty acid biosynthetic process, GO:0048469: cell maturation, GO:0016020: membrane, GO:0016021: integral to membrane, GO:0043209: myelin sheath, GO:0005198: structural molecu…		gb:BB768495 /DB_XREF=gi:16211037 /DB_XREF=BB768495 /CLONE=G370085M24 /FEA=FLmRNA /CNT=272 /TID=Mm.1268.1 /TIER=Stack /STK=9 /UG=Mm.1268 /LL=18823 /UG_GENE=Plp /UG_TITLE=proteolipid protein (myelin) /FL=gb:M14674.1 gb:M15442.1 gb:BC027010.1
1454756_at	control	10.6046	2.4363	PPP-PPP	1084.97	35.8461	445.33	98.1291	1096.8	1044.7	1113.4	534.5	340.2	461.3	Lrch3	leucine-rich repeats and calponin homology (CH) domain containing 3	16	16 B3	32833846	BB763476	70144	8889548, 10349636, 11042159, 11076861, 11217851, 12466851, 16141072, 16141073	GO:0005515: protein binding		gb:BB763476 /DB_XREF=gi:16192431 /DB_XREF=BB763476 /CLONE=G370025P09 /FEA=EST /CNT=84 /TID=Mm.30445.1 /TIER=Stack /STK=54 /UG=Mm.30445 /LL=106405 /UG_GENE=AW215594 /UG_TITLE=expressed sequence AW215594
1438404_at	control	10.6014	4.9947	PPP-PPA	1673.07	151.998	334.97	157.133	1572.3	1847.9	1599	509.4	291	204.5	Rnf144	ring finger protein 144	12	12 A3	-26893339	BB125272	108089	10349636, 10431818, 10922068, 11042159, 11076861, 11217851, 12466851, 12477932, 15368895, 15782199, 16141072, 16141073	GO:0006512: ubiquitin cycle, GO:0005634: nucleus, GO:0005794: Golgi apparatus, GO:0016021: integral to membrane, GO:0005515: protein binding, GO:0008270: zinc ion binding, GO:0046872: metal ion binding		gb:BB125272 /DB_XREF=gi:16262171 /DB_XREF=BB125272 /CLONE=9630004D18 /FEA=EST /CNT=69 /TID=Mm.45777.1 /TIER=Stack /STK=10 /UG=Mm.45777 /LL=104782 /UG_GENE=AI316797 /UG_TITLE=expressed sequence AI316797
1429656_at	control	10.6004	3.6853	PPP-AAA	171.73	17.5685	46.6	10.459	167.6	156.6	191	56.8	35.9	47.1	Rhobtb1	Rho-related BTB domain containing 1	10	10 B5.1	68608013	BB041370	69288	8889548, 10349636, 11042159, 11076861, 11217851, 12426103, 12466851, 12477932, 15368895, 15761153, 16141072, 16141073	GO:0007264: small GTPase mediated signal transduction, GO:0005622: intracellular, GO:0016020: membrane, GO:0000166: nucleotide binding, GO:0005515: protein binding, GO:0005525: GTP binding		gb:BB041370 /DB_XREF=gi:15403845 /DB_XREF=BB041370 /CLONE=6030455H18 /FEA=mRNA /CNT=25 /TID=Mm.89878.1 /TIER=Stack /STK=11 /UG=Mm.89878 /LL=69288 /UG_GENE=1700008H16Rik /UG_TITLE=RIKEN cDNA 1700008H16 gene
1425394_at	control	10.5989	4.0411	PPP-PPP	455.7	19.9922	112.77	52.3543	436.5	454.2	476.4	85.9	173.1	79.3	BC023105	cDNA sequence BC023105	18	18 E1	60564663	BC023105	207269	12477932			gb:BC023105.1 /DB_XREF=gi:18605634 /FEA=FLmRNA /CNT=9 /TID=Mm.105326.1 /TIER=FL /STK=2 /UG=Mm.105326 /DEF=Mus musculus, clone MGC:28198 IMAGE:3989161, mRNA, complete cds. /PROD=Unknown (protein for MGC:28198) /FL=gb:BC023105.1
1447345_at	control	10.5726	8.5265	PPP-AAA	476.63	62.8737	55.9	28.2438	510.2	404.1	515.6	37.3	88.4	42	A430107O13Rik	RIKEN cDNA A430107O13 gene	6	6 A3.1	21935910	AI482400	214642	10349636, 11042159, 11076861, 11217851, 12466851, 16141072, 16141073			gb:AI482400 /DB_XREF=gi:4375626 /DB_XREF=vg67e06.x1 /CLONE=IMAGE:871042 /FEA=EST /CNT=2 /TID=Mm.134918.1 /TIER=ConsEnd /STK=2 /UG=Mm.134918 /UG_TITLE=ESTs
1429195_at	control	10.5696	20.7974	PPP-AAP	3087.03	447.63	148.43	177.529	2598.5	3477.5	3185.1	21.5	72.5	351.3	Apol6	apolipoprotein L, 6	15	15 E1		AK010208	71939	10349636, 11042159, 11076861, 11217851, 12466851, 16141072, 16141073	GO:0006355: regulation of transcription, DNA-dependent, GO:0006869: lipid transport, GO:0042157: lipoprotein metabolic process, GO:0005576: extracellular region, GO:0003700: transcription factor activity, GO:0008289: lipid binding		gb:AK010208.1 /DB_XREF=gi:12845483 /FEA=mRNA /CNT=33 /TID=Mm.34173.1 /TIER=Stack /STK=9 /UG=Mm.34173 /LL=71939 /UG_GENE=2310076O14Rik /UG_TITLE=RIKEN cDNA 2310076O14 gene /DEF=Mus musculus adult male tongue cDNA, RIKEN full-length enriched library, clone:2310076O14:homolog to CB33F2.1 (PUTATIVE NOVEL PROTEIN SIMILAR TO C-TERMINAL PARTS OF APOL (APOLIPOPROTEIN L) AND TNF-INDUCIBLE PROTEIN CG12-1) …
1416779_at	control	10.5467	5.9307	PPP-PPP	11820.1	1133.78	1993.03	1148.51	10733.5	11730.9	12995.8	2942.1	2320.7	716.3	Sdpr	serum deprivation response	1	1 C1.1	51233670	BE197945	20324	8241023, 8889548, 10349636, 11042159, 11076861, 11217851, 12466851, 12477932, 15475267, 16141072, 16141073	GO:0005829: cytosol, GO:0001786: phosphatidylserine binding, GO:0005515: protein binding, GO:0008289: lipid binding		gb:BE197945 /DB_XREF=gi:8710114 /DB_XREF=ug76h12.x1 /CLONE=IMAGE:1548359 /FEA=FLmRNA /CNT=150 /TID=Mm.220962.1 /TIER=Stack /STK=10 /UG=Mm.220962 /LL=20324 /UG_GENE=Sdpr /UG_TITLE=serum deprivation response /FL=gb:NM_138741.1 gb:BC027005.1 gb:BC020008.1
1423952_a_at	control	10.5326	2.1791	PPP-PPP	552.1	43.381	253.37	23.0531	600.6	538.7	517	268.1	265.2	226.8	Krt7	keratin 7	15	15 F2	101240435	BC010337	110310	7527618, 9545508, 9811942, 10349636, 10725249, 10922068, 11013209, 11042159, 11062258, 11076861, 11217851, 11591653, 11696558, 12359226, 12399393, 12466851, 12477932, 14517990, 15086023, 16141072, 16141073, 16180309, 16831889, 16973199	GO:0007010: cytoskeleton organization and biogenesis, GO:0005882: intermediate filament, GO:0005198: structural molecule activity, GO:0005200: structural constituent of cytoskeleton, GO:0005515: protein binding	01430: Cell Communication	gb:BC010337.1 /DB_XREF=gi:16507854 /FEA=FLmRNA /CNT=85 /TID=Mm.30142.2 /TIER=FL+Stack /STK=73 /UG=Mm.30142 /LL=110961 /UG_GENE=D15Wsu77e /DEF=Mus musculus, Similar to DNA segment, Chr 15, Wayne State University 77, expressed, clone MGC:11625 IMAGE:3157030, mRNA, complete cds. /PROD=Similar to DNA segment, Chr 15, Wayne StateUniversity 77, expressed /FL=gb:BC010337.1
1433747_at	control	10.5304	3.9228	PPP-PPP	5149.13	598.898	1312.63	198.795	5237.4	5699	4511	1109.6	1506.9	1321.4	Lnpep	leucyl/cystinyl aminopeptidase	17	17 A3.1	-17232340	BQ176475	240028	10349636, 11042159, 11076861, 11217851, 11394912, 11884418, 12466851, 12477932, 12700100, 14985357, 15231875, 15800058, 16141072, 16141073, 16762977	GO:0006508: proteolysis, GO:0008152: metabolic process, GO:0030163: protein catabolic process, GO:0005624: membrane fraction, GO:0005792: microsome, GO:0005886: plasma membrane, GO:0048471: perinuclear region, GO:0004177: aminopeptidase activity, GO:0004179: membrane alanyl aminopeptidase activity, GO:0005515: protein binding, GO:0008237: metallopeptidase activity, GO:0008270: zinc ion binding, G…		gb:BQ176475 /DB_XREF=gi:20351967 /DB_XREF=UI-M-DJ2-bvw-b-14-0-UI.s1 /CLONE=UI-M-DJ2-bvw-b-14-0-UI /FEA=EST /CNT=100 /TID=Mm.35057.1 /TIER=Stack /STK=64 /UG=Mm.35057 /UG_TITLE=ESTs
1452303_at	control	10.5292	9.2857	PPP-AAA	299	28.8532	32.2	33.0713	278	287.1	331.9	70.1	9.2	17.3	Arhgef10	Rho guanine nucleotide exchange factor (GEF) 10	8	8 A1.1	14911693	AV345051	234094	8889548, 10349636, 10922068, 11042159, 11076861, 11217851, 12466851, 12477932, 12799088, 14508709, 15782199, 16141072, 16141073	GO:0006508: proteolysis, GO:0007242: intracellular signaling cascade, GO:0035023: regulation of Rho protein signal transduction, GO:0005622: intracellular, GO:0004197: cysteine-type endopeptidase activity, GO:0005085: guanyl-nucleotide exchange factor activity, GO:0005089: Rho guanyl-nucleotide exchange factor activity		gb:AV345051 /DB_XREF=gi:16397037 /DB_XREF=AV345051 /CLONE=6430549H08 /FEA=mRNA /CNT=56 /TID=Mm.74203.1 /TIER=Stack /STK=15 /UG=Mm.74203 /UG_TITLE=Mus musculus, clone IMAGE:3598550, mRNA, partial cds
1424233_at	control	10.5217	8.0294	PPP-PPP	874.67	112.597	108.93	56.6687	752.3	973.9	897.8	167.6	104.7	54.5	Meox2	mesenchyme homeobox 2	12	12 A3	37618811	BC002076	17286	1363541, 7554933, 7607679, 7623821, 7909944, 7964557, 8098844, 8565825, 8945939, 9032023, 9118475, 10349636, 10403250, 10597226, 10686601, 11042159, 11063256, 11076861, 11217851, 11404088, 11423130, 11830577, 11927540, 12051829, 12230980, 12466851, 12477932, 12490554, 12607001, 12732721, 12925591, 14516668, 14769860, 15024065, 15037549, 15037550, 15136140, 15198985, 15229648, 15249135, 15302604, …	GO:0001757: somite specification, GO:0006355: regulation of transcription, DNA-dependent, GO:0007275: multicellular organismal development, GO:0045449: regulation of transcription, GO:0005634: nucleus, GO:0005667: transcription factor complex, GO:0003677: DNA binding, GO:0003700: transcription factor activity, GO:0043565: sequence-specific DNA binding		gb:BC002076.1 /DB_XREF=gi:12805230 /FEA=FLmRNA /CNT=66 /TID=Mm.153716.1 /TIER=FL+Stack /STK=44 /UG=Mm.153716 /LL=17286 /UG_GENE=Meox2 /DEF=Mus musculus, Similar to mesenchyme homeobox 2, clone MGC:6225 IMAGE:3591924, mRNA, complete cds. /PROD=Similar to mesenchyme homeobox 2 /FL=gb:BC002076.1
1419314_at	control	10.5098	7.2176	PPP-AAA	169.13	22.7016	23.43	7.8233	195.2	158.5	153.7	19.9	18	32.4	Tinag	tubulointerstitial nephritis antigen	9	9 D	-76737606	BC010745	26944	9291180, 10349636, 10500175, 10652240, 11042159, 11076861, 11217851, 12466851, 12477932, 16141072, 16141073	GO:0006508: proteolysis, GO:0005615: extracellular space, GO:0004197: cysteine-type endopeptidase activity, GO:0008234: cysteine-type peptidase activity		gb:BC010745.1 /DB_XREF=gi:14789618 /FEA=FLmRNA /CNT=23 /TID=Mm.23199.1 /TIER=FL+Stack /STK=11 /UG=Mm.23199 /LL=26944 /UG_GENE=Tinag /DEF=Mus musculus, Similar to tubulointerstitial nephritis antigen, clone MGC:18306 IMAGE:4239192, mRNA, complete cds. /PROD=Similar to tubulointerstitial nephritis antigen /FL=gb:AF153366.1 gb:NM_012033.1 gb:BC010745.1
1443053_at	control	10.4984	5.1665	PPP-AAA	173.77	4.5446	33.63	22.6686	177.9	174.5	168.9	8.7	39.2	53	Ptprd	protein tyrosine phosphatase, receptor type, D	4	4 C3	-75412469	BB523104	19266	7595475, 7733931, 7832766, 7988677, 8267598, 8355697, 8875997, 8889548, 8989520, 9566880, 9784606, 10101124, 10349636, 10856223, 11042159, 11076861, 11217851, 11978849, 12205107, 12466851, 12477932, 15172686, 15684034, 16141072, 16141073, 16373427, 16738228	GO:0006470: protein amino acid dephosphorylation, GO:0006470: protein amino acid dephosphorylation, GO:0006796: phosphate metabolic process, GO:0007155: cell adhesion, GO:0007185: transmembrane receptor protein tyrosine phosphatase signaling pathway, GO:0007185: transmembrane receptor protein tyrosine phosphatase signaling pathway, GO:0005886: plasma membrane, GO:0005887: integral to plasma membr…		gb:BB523104 /DB_XREF=gi:16443777 /DB_XREF=BB523104 /CLONE=D930011P18 /FEA=EST /CNT=3 /TID=Mm.136244.1 /TIER=ConsEnd /STK=3 /UG=Mm.136244 /UG_TITLE=ESTs
1421977_at	control	10.4796	6.1034	PPP-AAA	216.47	29.0114	35.47	7.2982	203.5	249.7	196.2	28.7	43.2	34.5	Mmp19	matrix metallopeptidase 19	10	10 D3	128193921	AF153199	58223	10349636, 11042159, 11054540, 11076861, 11092553, 11217851, 12466851, 12477932, 15063736, 15169894, 15734845, 16141072, 16141073, 16452166, 16707448	GO:0000270: peptidoglycan metabolic process, GO:0001525: angiogenesis, GO:0006508: proteolysis, GO:0007275: multicellular organismal development, GO:0030154: cell differentiation, GO:0030574: collagen catabolic process, GO:0005578: extracellular matrix (sensu Metazoa), GO:0005615: extracellular space, GO:0016020: membrane, GO:0004222: metalloendopeptidase activity, GO:0004222: metalloendopeptidas…		gb:AV375008 /DB_XREF=gi:16397971 /DB_XREF=AV375008 /CLONE=9130020A17 /FEA=FLmRNA /CNT=23 /TID=Mm.131266.1 /TIER=ConsEnd /STK=1 /UG=Mm.131266 /LL=58223 /UG_GENE=Mmp19 /UG_TITLE=matrix metalloproteinase 19 /FL=gb:NM_021412.1 gb:AF162446.1 gb:AF153199.1 gb:AF155221.1
1418058_at	control	10.4716	4.6241	PPP-PAA	1311.7	156.043	283.67	67.5642	1179.9	1271.2	1484	335.3	308.5	207.2	Eltd1	EGF, latrophilin seven transmembrane domain containing 1	3	3 H3-H4	151375272	BC017134	170757	11050079, 11217851, 11438738, 12466851, 12477932, 14647991, 15203201	GO:0007165: signal transduction, GO:0007186: G-protein coupled receptor protein signaling pathway, GO:0007218: neuropeptide signaling pathway, GO:0005615: extracellular space, GO:0016020: membrane, GO:0016021: integral to membrane, GO:0004871: signal transducer activity, GO:0004872: receptor activity, GO:0004930: G-protein coupled receptor activity, GO:0005509: calcium ion binding		gb:NM_133222.1 /DB_XREF=gi:18875377 /GEN=ETL1 /FEA=FLmRNA /CNT=65 /TID=Mm.27242.1 /TIER=FL+Stack /STK=31 /UG=Mm.27242 /LL=170757 /DEF=Mus musculus ETL1 (ETL1), mRNA. /PROD=ETL1 /FL=gb:BC017134.1 gb:AF385682.1 gb:NM_133222.1
1431619_a_at	control	10.4633	2.3701	PPP-PPP	1293.6	123.237	545.8	11.6632	1203.8	1434.1	1242.9	558.7	542.7	536	Dtnbp1	dystrobrevin binding protein 1	13	13 A5	-44933053	AK017400	94245	1936982, 8889548, 9585243, 9714600, 10349636, 11042159, 11076861, 11217851, 11316798, 12098102, 12466851, 12477932, 12878699, 12923531, 14688250, 15009730, 15345706, 15702992, 16141072, 16141073, 16980328	GO:0006996: organelle organization and biogenesis, GO:0007517: muscle development, GO:0007601: visual perception, GO:0050896: response to stimulus, GO:0005634: nucleus, GO:0005737: cytoplasm, GO:0005886: plasma membrane, GO:0016528: sarcoplasm, GO:0030424: axon, GO:0042383: sarcolemma, GO:0005515: protein binding, GO:0042802: identical protein binding		gb:AK017400.1 /DB_XREF=gi:12856620 /GEN=Dtnbp1 /FEA=mRNA /CNT=2 /TID=Mm.41663.2 /TIER=ConsEnd /STK=1 /UG=Mm.41663 /LL=94245 /UG_TITLE=dystrobrevin binding protein 1 /DEF=Mus musculus 6 days neonate head cDNA, RIKEN full-length enriched library, clone:5430437B18:dystrobrevin binding protein 1, full insert sequence.
1439531_at	control	10.4293	1.9753	PPP-PPP	714.2	57.1003	361.57	13.0113	657.2	771.4	714	358.3	375.9	350.5	E130311K13Rik	RIKEN cDNA E130311K13 gene	3	3 E1	-64002624	BB754259	329659	10349636, 11042159, 11076861, 11217851, 12466851, 16141072, 16141073	GO:0016020: membrane, GO:0016021: integral to membrane		gb:BB754259 /DB_XREF=gi:16184495 /DB_XREF=BB754259 /CLONE=G270040J09 /FEA=EST /CNT=12 /TID=Mm.39342.1 /TIER=ConsEnd /STK=7 /UG=Mm.39342 /UG_TITLE=ESTs
1428615_at	control	10.3865	2.1883	PPP-PPP	3372.8	127.134	1541.27	277.709	3261.6	3511.4	3345.4	1516.8	1830.4	1276.6	P2ry5	purinergic receptor P2Y, G-protein coupled, 5	14	14 D2	71972049	AK008952	67168	10349636, 11042159, 11076861, 11217851, 12466851, 12477932, 16141072, 16141073	GO:0007165: signal transduction, GO:0007186: G-protein coupled receptor protein signaling pathway, GO:0016020: membrane, GO:0016021: integral to membrane, GO:0001584: rhodopsin-like receptor activity, GO:0004871: signal transducer activity, GO:0004872: receptor activity, GO:0004930: G-protein coupled receptor activity, GO:0045028: purinergic nucleotide receptor activity, G-protein coupled	04080: Neuroactive ligand-receptor interaction	gb:AK008952.1 /DB_XREF=gi:12843450 /FEA=mRNA /CNT=91 /TID=Mm.28294.1 /TIER=Stack /STK=29 /UG=Mm.28294 /LL=67168 /UG_GENE=2610302I02Rik /UG_TITLE=RIKEN cDNA 2610302I02 gene /DEF=Mus musculus adult male stomach cDNA, RIKEN full-length enriched library, clone:2210416I02:homolog to P2Y PURINOCEPTOR 5 (P2Y5) (PURINERGIC RECEPTOR 5) (RB INTRON ENCODED G-PROTEIN COUPLED RECEPTOR), full insert sequence.
1417789_at	control	10.3678	25.6117	PPP-AAA	1616.1	254.399	63.1	50.9247	1338.3	1837.7	1672.3	93	92	4.3	Ccl11	small chemokine (C-C motif) ligand 11	11	11 C	81874116	NM_011330	20292	7509365, 7568052, 7869037, 8574847, 8702853, 8996246, 9034156, 9107693, 9169149, 9177770, 9260933, 9365121, 9776760, 9808585, 10079098, 10349636, 10841566, 10995569, 11042159, 11076861, 11113143, 11217851, 11410366, 11590387, 11694459, 11735217, 12045241, 12060577, 12080938, 12083417, 12126650, 12127048, 12466851, 12477932, 12525563, 14598258, 14648203, 15100311, 15130922, 15316665, 15356103, 155…	GO:0006935: chemotaxis, GO:0006954: inflammatory response, GO:0006955: immune response, GO:0007165: signal transduction, GO:0005576: extracellular region, GO:0005615: extracellular space, GO:0005125: cytokine activity, GO:0008009: chemokine activity	04060: Cytokine-cytokine receptor interaction	gb:NM_011330.1 /DB_XREF=gi:6755417 /GEN=Scya11 /FEA=FLmRNA /CNT=59 /TID=Mm.4686.1 /TIER=FL+Stack /STK=36 /UG=Mm.4686 /LL=20292 /DEF=Mus musculus small inducible cytokine A11 (Scya11), mRNA. /PROD=small inducible cytokine A11 /FL=gb:U40672.1 gb:AF128205.1 gb:U26426.1 gb:AF128209.1 gb:NM_011330.1 gb:AF128208.1 gb:AF128207.1 gb:AF128206.1
1438815_at	control	10.3631	1.4486	APP-PAP	93	2.4249	64.2	4.1581	92.6	90.8	95.6	61.9	61.7	69	Hist2h2aa2	histone cluster 2, H2aa2	3		-96325262, 96330985	BB360457	319192	10349636, 11042159, 11076861, 11217851, 12408966, 12466851, 12477932, 16141072, 16141073	GO:0006334: nucleosome assembly, GO:0007001: chromosome organization and biogenesis (sensu Eukaryota), GO:0000786: nucleosome, GO:0005634: nucleus, GO:0005694: chromosome, GO:0003677: DNA binding		gb:BB360457 /DB_XREF=gi:9072285 /DB_XREF=BB360457 /CLONE=C030047E02 /FEA=EST /CNT=10 /TID=Mm.100244.1 /TIER=Stack /STK=9 /UG=Mm.100244 /UG_TITLE=ESTs, Weakly similar to TYROSINE-PROTEIN KINASE JAK3 (M.musculus)
1455792_x_at	control	10.3316	29.3595	PPP-PAA	1472.87	235.714	50.17	36.4187	1219.7	1686	1512.9	90.2	41.3	19	Ndn	necdin	7	7 C	62227226	AV124445	17984	1394972, 2069569, 2571505, 7639751, 7794255, 8557705, 8615786, 9302265, 9412790, 9422723, 9630521, 10319852, 10339753, 10349636, 10464095, 10508517, 10556298, 10915770, 10922068, 10965153, 11007541, 11042159, 11076861, 11115855, 11168589, 11217851, 11454705, 11668390, 11719692, 11845283, 11959851, 12083804, 12198120, 12414813, 12421715, 12466851, 12477932, 12482959, 12629158, 12828934, 12971993, …	GO:0001558: regulation of cell growth, GO:0001764: neuron migration, GO:0006350: transcription, GO:0006355: regulation of transcription, DNA-dependent, GO:0006874: calcium ion homeostasis, GO:0007409: axonogenesis, GO:0007413: axonal fasciculation, GO:0007417: central nervous system development, GO:0007585: respiratory gaseous exchange, GO:0008347: glial cell migration, GO:0019233: sensory percep…		gb:AV124445 /DB_XREF=gi:5310679 /DB_XREF=AV124445 /CLONE=2700018J21 /FEA=EST /CNT=104 /TID=Mm.7089.3 /TIER=Stack /STK=102 /UG=Mm.7089 /LL=17984 /UG_GENE=Ndn /UG_TITLE=necdin
1430185_at	control	10.3147	2.4415	PPP-PPP	187.27	7.7925	76.7	16.852	178.3	191.1	192.4	57.4	88.5	84.2	Akap13	A kinase (PRKA) anchor protein 13	7	7 D1		BB109690	75547	8889548, 10349636, 11042159, 11076861, 11217851, 12466851, 12477932, 16141072, 16141073	GO:0007242: intracellular signaling cascade, GO:0035023: regulation of Rho protein signal transduction, GO:0005622: intracellular, GO:0005089: Rho guanyl-nucleotide exchange factor activity, GO:0008270: zinc ion binding, GO:0016301: kinase activity, GO:0019992: diacylglycerol binding, GO:0046872: metal ion binding		gb:BB109690 /DB_XREF=gi:8762258 /DB_XREF=BB109690 /CLONE=9530020G23 /FEA=mRNA /CNT=7 /TID=Mm.130788.1 /TIER=ConsEnd /STK=3 /UG=Mm.130788 /LL=76109 /UG_GENE=5830460E08Rik /UG_TITLE=RIKEN cDNA 5830460E08 gene
1416209_at	control	10.2799	1.9103	PPP-PPP	3519.53	222.134	1842.43	174.656	3675.5	3617.9	3265.2	1963.4	1921.7	1642.2	Glud1	glutamate dehydrogenase 1	14	14 B	33139842	NM_008133	14661	1617216, 1711373, 2045113, 2293612, 2338144, 2566156, 3182016, 3585334, 7558022, 7873882, 7896292, 8053909, 8415706, 8858346, 9756038, 10349636, 10454512, 10922068, 11042159, 11076861, 11217851, 11792727, 12466851, 12477932, 12865426, 14651853, 15609325, 15782199, 16141072, 16141073	GO:0006520: amino acid metabolic process, GO:0007169: transmembrane receptor protein tyrosine kinase signaling pathway, GO:0005739: mitochondrion, GO:0005743: mitochondrial inner membrane, GO:0000166: nucleotide binding, GO:0004353: glutamate dehydrogenase [NAD(P)+] activity, GO:0005524: ATP binding, GO:0005525: GTP binding, GO:0016491: oxidoreductase activity	00251: Glutamate metabolism, 00330: Arginine and proline metabolism, 00471: D-Glutamine and D-glutamate metabolism, 00910: Nitrogen metabolism	gb:BI329832 /DB_XREF=gi:15014489 /DB_XREF=602984989F1 /CLONE=IMAGE:5137463 /FEA=FLmRNA /CNT=323 /TID=Mm.10600.1 /TIER=Stack /STK=19 /UG=Mm.10600 /LL=14661 /UG_GENE=Glud /UG_TITLE=glutamate dehydrogenase /FL=gb:NM_008133.1
1436937_at	control	10.2638	4.0802	PPP-PPP	1139.87	47.5511	279.37	137.206	1104.4	1121.3	1193.9	393.9	316.9	127.3	Rbms3	RNA binding motif, single stranded interacting protein	9	9 F3	-116426293	BB053506	207181	10349636, 11042159, 11076861, 11217851, 12466851, 12477932, 16033648, 16141072, 16141073	GO:0000166: nucleotide binding, GO:0003676: nucleic acid binding, GO:0003723: RNA binding		gb:BB027626 /DB_XREF=gi:15403508 /DB_XREF=BB027626 /CLONE=5330438F10 /FEA=EST /CNT=116 /TID=Mm.133242.1 /TIER=Stack /STK=34 /UG=Mm.133242 /UG_TITLE=ESTs, Weakly similar to RNA binding motif, single stranded interacting protein 1 (Mus musculus) (M.musculus)
1436933_at	control	10.2525	3.2196	PPP-PPP	930.67	61.1281	289.07	89.5107	927.1	993.5	871.4	243.4	392.2	231.6	Akap13	A kinase (PRKA) anchor protein 13	7	7 D1		BM211430	75547	8889548, 10349636, 11042159, 11076861, 11217851, 12466851, 12477932, 16141072, 16141073	GO:0007242: intracellular signaling cascade, GO:0035023: regulation of Rho protein signal transduction, GO:0005622: intracellular, GO:0005089: Rho guanyl-nucleotide exchange factor activity, GO:0008270: zinc ion binding, GO:0016301: kinase activity, GO:0019992: diacylglycerol binding, GO:0046872: metal ion binding		gb:BM211430 /DB_XREF=gi:17768630 /DB_XREF=C0806D09-3 /CLONE=C0806D09 /FEA=EST /CNT=35 /TID=Mm.216107.1 /TIER=Stack /STK=35 /UG=Mm.216107 /UG_TITLE=ESTs
1416136_at	control	10.2434	7.8223	PPP-PPP	2213.97	294.455	283.03	141.066	1897	2265.9	2479	439.1	245.4	164.6	Mmp2	matrix metallopeptidase 2	8	8 C5	95716455	NM_008610	17390	1373140, 1471951, 7626795, 7669731, 7894006, 8015608, 8144618, 8674412, 8743942, 8872958, 9069116, 9087449, 9108368, 9134100, 9278386, 9291579, 9417058, 9500469, 9508784, 9648071, 9658163, 9882504, 10090151, 10201949, 10215319, 10232461, 10349636, 10419448, 10433819, 10731089, 10801980, 10821760, 10880400, 10922068, 10949577, 10985432, 11006154, 11025665, 11042159, 11076861, 11217851, 11675412, 1…	GO:0000270: peptidoglycan metabolic process, GO:0001955: blood vessel maturation, GO:0006508: proteolysis, GO:0030574: collagen catabolic process, GO:0005578: extracellular matrix (sensu Metazoa), GO:0005615: extracellular space, GO:0004222: metalloendopeptidase activity, GO:0004228: gelatinase A activity, GO:0005509: calcium ion binding, GO:0008233: peptidase activity, GO:0008237: metallopeptida…	04670: Leukocyte transendothelial migration, 04912: GnRH signaling pathway	gb:NM_008610.1 /DB_XREF=gi:6678901 /GEN=Mmp2 /FEA=FLmRNA /CNT=233 /TID=Mm.29564.1 /TIER=FL+Stack /STK=122 /UG=Mm.29564 /LL=17390 /DEF=Mus musculus matrix metalloproteinase 2 (Mmp2), mRNA. /PROD=matrix metalloproteinase 2 /FL=gb:M84324.1 gb:NM_008610.1
1436938_at	control	10.2095	3.6972	PPP-PPP	3811.23	205.397	1030.83	424.629	3832.1	4005.4	3596.2	1458.3	1025.1	609.1	Rbms3	RNA binding motif, single stranded interacting protein	9	9 F3	-116426293	BB053506	207181	10349636, 11042159, 11076861, 11217851, 12466851, 12477932, 16033648, 16141072, 16141073	GO:0000166: nucleotide binding, GO:0003676: nucleic acid binding, GO:0003723: RNA binding		gb:BB053506 /DB_XREF=gi:16259679 /DB_XREF=BB053506 /CLONE=6720463O22 /FEA=EST /CNT=116 /TID=Mm.133242.1 /TIER=Stack /STK=14 /UG=Mm.133242 /UG_TITLE=ESTs, Weakly similar to RNA binding motif, single stranded interacting protein 1 (Mus musculus) (M.musculus)
1455078_at	control	10.2003	2.5674	PPP-PPP	1821.83	168.952	709.6	84.4036	1987.3	1828.6	1649.6	642	682.6	804.2	Hsp90aa1	heat shock protein 90kDa alpha (cytosolic), class A member 1	12	12 F1	-111138842	BG075662	15519	1916807, 2469626, 2806771, 2882955, 2925609, 6095043, 6413838, 7671812, 8562047, 8974842, 9122205, 9250399, 9507200, 9811942, 10349636, 10378145, 10654595, 10922068, 11042159, 11076861, 11099500, 11217851, 11461004, 11867214, 12136260, 12466851, 12477932, 12495215, 12713799, 12748967, 12855682, 12885400, 13129914, 14724288, 14766729, 15226823, 15664193, 15703188, 15782199, 15864309, 16141072, 161…	GO:0006457: protein folding, GO:0006809: nitric oxide biosynthetic process, GO:0006986: response to unfolded protein, GO:0009408: response to heat, GO:0042026: protein refolding, GO:0045429: positive regulation of nitric oxide biosynthetic process, GO:0045585: positive regulation of cytotoxic T cell differentiation, GO:0005829: cytosol, GO:0000166: nucleotide binding, GO:0005515: protein binding,…	04612: Antigen processing and presentation	gb:BG075662 /DB_XREF=gi:12558231 /DB_XREF=H3149H10-3 /CLONE=H3149H10 /FEA=EST /CNT=53 /TID=Mm.34590.1 /TIER=Stack /STK=26 /UG=Mm.34590 /UG_TITLE=ESTs
1429196_at	control	10.1989	2.5659	PPP-PPP	308.93	19.6322	120.4	25.2929	330.9	293.1	302.8	140.5	128.7	92	Rabgap1l	RAB GTPase activating protein 1-like	1	1 H2.1	-162093881, -162055850	BB431654	29809	8889548, 10349636, 10585558, 11042159, 11076861, 11217851, 12466851, 12477932, 12693553, 15226823, 16141072, 16141073	GO:0008150: biological_process, GO:0005575: cellular_component, GO:0003674: molecular_function		gb:BB431654 /DB_XREF=gi:16424175 /DB_XREF=BB431654 /CLONE=C630039O19 /FEA=mRNA /CNT=38 /TID=Mm.39565.1 /TIER=Stack /STK=9 /UG=Mm.39565 /LL=78066 /UG_GENE=5830411O09Rik /UG_TITLE=RIKEN cDNA 5830411O09 gene
1448029_at	control	10.1929	5.3456	PPP-PAA	241.8	16.7955	45.23	28.8722	233.8	230.5	261.1	58.6	65	12.1	Tbx3	T-box 3	5	5 F	119931285	AA543734	21386	1375456, 7688225, 7920656, 8798150, 8853987, 8878690, 8889548, 8954725, 9169414, 9196325, 9207801, 9337408, 9503012, 10072792, 10349636, 10725249, 11042159, 11044609, 11076861, 11217851, 11726608, 11748239, 12032820, 12376101, 12466851, 12477932, 12668638, 12736212, 14723846, 15136151, 15158141, 15255957, 15385444, 15459098, 15618518, 15843407, 15901664, 16140987, 16141072, 16141073, 16207751, 16…	GO:0001568: blood vessel development, GO:0006350: transcription, GO:0006355: regulation of transcription, DNA-dependent, GO:0007275: multicellular organismal development, GO:0007569: cell aging, GO:0009887: organ morphogenesis, GO:0016481: negative regulation of transcription, GO:0030879: mammary gland development, GO:0030879: mammary gland development, GO:0035108: limb morphogenesis, GO:0035136:…		gb:AA543734 /DB_XREF=gi:2292211 /DB_XREF=vk26d06.r1 /CLONE=IMAGE:947723 /FEA=EST /CNT=17 /TID=Mm.23467.2 /TIER=ConsEnd /STK=0 /UG=Mm.23467 /LL=52240 /UG_GENE=D5Ertd189e /UG_TITLE=DNA segment, Chr 5, ERATO Doi 189, expressed
1424443_at	control	10.1817	3.5677	PPP-PPP	1106.23	59.1994	310.07	121.817	1091.2	1171.5	1056	398.9	360.1	171.2	Tm6sf1	transmembrane 6 superfamily member 1	7	7 D1	81732643	AV378394	107769	8889548, 10349636, 11042159, 11076861, 11124529, 11217851, 12466851, 12477932, 16141072, 16141073	GO:0016020: membrane, GO:0016021: integral to membrane		gb:BC023123.1 /DB_XREF=gi:18606231 /FEA=FLmRNA /CNT=73 /TID=Mm.200913.1 /TIER=FL+Stack /STK=32 /UG=Mm.200913 /DEF=Mus musculus, Similar to transmembrane 6 superfamily member 1, clone MGC:25583 IMAGE:3995280, mRNA, complete cds. /PROD=Similar to transmembrane 6 superfamily member 1 /FL=gb:BC023123.1
1456475_s_at	control	10.1639	8.3686	PPP-PPP	11595	1677.32	1385.53	462.104	10444.9	13519.6	10820.4	880.5	1787.2	1488.9	Prkar2b	protein kinase, cAMP dependent regulatory, type II beta	12	12 B1	-32543725	BB216074	19088	1332964, 2069562, 7740174, 7775586, 8757131, 8794865, 8889548, 9020105, 9342379, 9570795, 10349636, 10593917, 10783399, 10922068, 11042159, 11076861, 11217851, 11278869, 11679434, 12466851, 12477932, 12842296, 12902333, 15183205, 15192081, 15483123, 15618289, 15782199, 16141072, 16141073, 16529875, 16624954, 16634851, 16707791	GO:0006468: protein amino acid phosphorylation, GO:0006631: fatty acid metabolic process, GO:0007165: signal transduction, GO:0007612: learning, GO:0008283: cell proliferation, GO:0009887: organ morphogenesis, GO:0005952: cAMP-dependent protein kinase complex, GO:0000166: nucleotide binding, GO:0004672: protein kinase activity, GO:0008603: cAMP-dependent protein kinase regulator activity, GO:0016…	04210: Apoptosis, 04910: Insulin signaling pathway	gb:BB216074 /DB_XREF=gi:16353083 /DB_XREF=BB216074 /CLONE=A530030L19 /FEA=EST /CNT=136 /TID=Mm.25594.2 /TIER=Stack /STK=9 /UG=Mm.25594 /LL=19088 /UG_GENE=Prkar2b /UG_TITLE=protein kinase, cAMP dependent regulatory, type II beta
1425809_at	control	10.1348	37.3868	PPP-PPM	8770.93	1456.45	234.6	83.8814	8965.7	7226.9	10120.2	331.4	183.3	189.1	Fabp4	fatty acid binding protein 4, adipocyte	3	3 A1	-10186878	BC018558	11770	1617216, 1618860, 1794058, 2452440, 2506639, 3015943, 3036869, 3520554, 3968175, 6206497, 7906967, 8910278, 9371744, 9405372, 10224167, 10349636, 10512363, 10866041, 10965911, 10982846, 11042159, 11076861, 11217851, 11385507, 11481226, 11606480, 11827549, 11940593, 12377750, 12466851, 12477932, 12588883, 13129924, 15130516, 15155732, 15158467, 15175761, 15353487, 15367400, 15454399, 15684432, 157…	GO:0001816: cytokine production, GO:0006469: negative regulation of protein kinase activity, GO:0006810: transport, GO:0016481: negative regulation of transcription, GO:0042632: cholesterol homeostasis, GO:0050729: positive regulation of inflammatory response, GO:0005488: binding, GO:0008289: lipid binding, GO:0016564: transcriptional repressor activity	03320: PPAR signaling pathway	gb:BC018558.1 /DB_XREF=gi:17391328 /FEA=FLmRNA /CNT=6 /TID=Mm.214644.1 /TIER=FL /STK=1 /UG=Mm.214644 /DEF=Mus musculus, Similar to fatty acid binding protein 4, adipocyte, clone MGC:18548 IMAGE:3670866, mRNA, complete cds. /PROD=Similar to fatty acid binding protein 4,adipocyte /FL=gb:BC018558.1
1454705_at	control	10.1241	1.2108	PPP-PPP	1708.93	10.6237	1411.47	49.7701	1710.8	1697.5	1718.5	1360.9	1413.1	1460.4	D15Ertd621e	DNA segment, Chr 15, ERATO Doi 621, expressed	15	15 D1	58245564	BM235412	210998	10349636, 10725249, 10922068, 11042159, 11076861, 11217851, 11544199, 12466851, 12477932, 12693553, 15782199, 16141072, 16141073			gb:BM235412 /DB_XREF=gi:17870682 /DB_XREF=K0417H09-3 /CLONE=K0417H09 /FEA=EST /CNT=157 /TID=Mm.3224.1 /TIER=Stack /STK=66 /UG=Mm.3224 /LL=52667 /UG_GENE=D15Ertd621e /UG_TITLE=DNA segment, Chr 15, ERATO Doi 621, expressed
1439928_at	control	10.0863	4.622	PPP-PPP	1273.83	158.376	275.6	65.5902	1091.5	1377.2	1352.8	265.9	345.5	215.4	Spnb2	spectrin beta 2	11	11 A3.3	-29999395, -30006842	BB148843	20742	1638088, 1742606, 3862089, 7565694, 7671812, 7698769, 8199405, 8288233, 8479293, 8751373, 8776664, 8827514, 8889548, 9196007, 9211987, 9321482, 9551868, 9653646, 9927192, 10349636, 10922068, 11042159, 11076861, 11210191, 11217851, 11294830, 11544199, 11564759, 11923214, 12149647, 12466851, 12477932, 12543979, 15262991, 15566516, 15610403, 15899814, 16141072, 16141073, 16288220, 16551741, 16650383…	GO:0006306: DNA methylation, GO:0007182: common-partner SMAD protein phosphorylation, GO:0007184: SMAD protein nuclear translocation, GO:0051016: barbed-end actin filament capping, GO:0005634: nucleus, GO:0005856: cytoskeleton, GO:0005886: plasma membrane, GO:0016020: membrane, GO:0003677: DNA binding, GO:0003779: actin binding, GO:0005515: protein binding, GO:0005516: calmodulin binding	04530: Tight junction	gb:BB148843 /DB_XREF=gi:16267794 /DB_XREF=BB148843 /CLONE=9930114O11 /FEA=EST /CNT=7 /TID=Mm.103022.1 /TIER=ConsEnd /STK=6 /UG=Mm.103022 /UG_TITLE=ESTs
1449145_a_at	control	10.0655	6.0813	PPP-PPP	26414	2648.02	4343.5	2722.46	26982.5	28731.6	23527.9	6582.5	5135	1313	Cav1	caveolin, caveolae protein 1	6	6 A2	17256369	AB029929	12389	7926819, 8521953, 8552590, 8567687, 8663016, 9008709, 9148942, 9153235, 9375801, 9662443, 9685399, 9837809, 10036317, 10197531, 10349636, 10373486, 10460238, 10577503, 10631317, 10725249, 10825283, 10922068, 10988290, 11042159, 11076861, 11078729, 11208732, 11217851, 11325515, 11331305, 11457855, 11498544, 11564885, 11602600, 11689550, 11733547, 11739396, 11748292, 11751885, 11784086, 11845324, 1…	GO:0000188: inactivation of MAPK activity, GO:0001937: negative regulation of endothelial cell proliferation, GO:0006641: triacylglycerol metabolic process, GO:0006897: endocytosis, GO:0008285: negative regulation of cell proliferation, GO:0009968: negative regulation of signal transduction, GO:0019217: regulation of fatty acid metabolic process, GO:0019915: sequestering of lipid, GO:0030301: cho…	04510: Focal adhesion	gb:AB029929.1 /DB_XREF=gi:6705976 /FEA=FLmRNA /CNT=60 /TID=Mm.28278.1 /TIER=FL+Stack /STK=21 /UG=Mm.28278 /LL=12389 /UG_GENE=Cav /DEF=Mus musculus mRNA for caveolin-1 alfa isoform, complete cds. /PROD=caveolin-1 alfa isoform /FL=gb:AB029929.1 gb:NM_007616.1 gb:U07645.1
1437889_x_at	control	10.0554	8.8802	PPP-PPP	3275	480.428	368.8	140.661	3269	3758.4	2797.6	444.5	455.4	206.5	Bgn	biglycan	X	X B	69736363	AI931862	12111	2212616, 7821804, 7961765, 8043960, 8088815, 8093671, 8595907, 8828036, 9421237, 9730605, 9731537, 10087208, 10349636, 10684260, 10896944, 10922068, 11040287, 11042159, 11076861, 11152695, 11217851, 11311118, 11535822, 11811564, 11978731, 12102052, 12122449, 12213783, 12466851, 12477932, 12519075, 12666199, 12684764, 12724831, 12796502, 12799472, 12975603, 14672350, 14966118, 15063173, 15173106, …	GO:0005578: extracellular matrix (sensu Metazoa), GO:0005615: extracellular space, GO:0030133: transport vesicle, GO:0005515: protein binding		gb:AI931862 /DB_XREF=gi:5668347 /DB_XREF=ul67a07.x1 /CLONE=IMAGE:2135604 /FEA=EST /CNT=18 /TID=Mm.2608.2 /TIER=Stack /STK=13 /UG=Mm.2608 /LL=12111 /UG_GENE=Bgn /UG_TITLE=biglycan
1439643_at	control	10.0348	2.4553	PPP-PPP	1578	51.166	642.7	153.113	1528.4	1630.6	1575	554.3	819.5	554.3	Acvr2a	activin receptor IIA	2	2 C1.1	48636165	BG076154	11480	1318045, 1330789, 1646080, 7577669, 7748787, 7821227, 7885474, 7890768, 8049070, 8074643, 8586443, 8612709, 8732684, 8875905, 8959336, 8995483, 9371744, 9482661, 9610356, 9825674, 9986727, 10231550, 10349636, 10452853, 10772805, 10921901, 11042159, 11076861, 11217851, 11416011, 11459797, 11459935, 11468775, 11714685, 12414726, 12466851, 12666204, 12782414, 14654247, 15277382, 15342483, 15451561, …	GO:0006468: protein amino acid phosphorylation, GO:0007178: transmembrane receptor protein serine/threonine kinase signaling pathway, GO:0007283: spermatogenesis, GO:0007368: determination of left/right symmetry, GO:0007498: mesoderm development, GO:0008584: male gonad development, GO:0009952: anterior/posterior pattern formation, GO:0042713: sperm ejaculation, GO:0043084: penile erection, GO:004…	04060: Cytokine-cytokine receptor interaction, 04350: TGF-beta signaling pathway	gb:BG076154 /DB_XREF=gi:12558723 /DB_XREF=H3156C06-3 /CLONE=H3156C06 /FEA=EST /CNT=9 /TID=Mm.114880.1 /TIER=ConsEnd /STK=7 /UG=Mm.114880 /UG_TITLE=ESTs
1434681_at	control	10.0185	2.9497	PPP-PPP	2260.47	255.623	766.33	37.1793	1965.4	2414.7	2401.3	809.1	741.7	748.2	4932441K18Rik	RIKEN cDNA 4932441K18 gene	X	X F4	-158123023	BG069603	353170	10349636, 10922068, 11042159, 11076861, 11217851, 12466851, 12477932, 15911876, 16141072, 16141073			gb:BG069603 /DB_XREF=gi:12552172 /DB_XREF=H3078B05-3 /CLONE=H3078B05 /FEA=EST /CNT=42 /TID=Mm.1603.3 /TIER=Stack /STK=27 /UG=Mm.1603 /LL=19648 /UG_GENE=Rbbp7 /UG_TITLE=retinoblastoma binding protein 7
1427888_a_at	control	10.0093	1.7253	PPP-PPP	6029.27	40.9059	3494.7	436.682	6067.6	5986.2	6034	3330.4	3164	3989.7	Spna2	spectrin alpha 2	2	2 B	29787568	AK011566	20740	1315305, 1358808, 1467942, 1638088, 1673105, 1676977, 1742606, 1828262, 1916246, 1970329, 2111175, 2926814, 3186715, 3862089, 7495297, 7665181, 7774911, 7789992, 7874505, 7906966, 8012656, 8075499, 8088777, 8242701, 8406479, 8449489, 8464923, 8479293, 8530383, 8776664, 8786137, 8799160, 8889548, 9211987, 9675416, 10349636, 10922068, 11042159, 11076861, 11217851, 12097413, 12466851, 12477932, 1524…	GO:0051016: barbed-end actin filament capping, GO:0005856: cytoskeleton, GO:0016020: membrane, GO:0030018: Z disc, GO:0003779: actin binding, GO:0005509: calcium ion binding, GO:0005516: calmodulin binding	04530: Tight junction	gb:AK011566.1 /DB_XREF=gi:12847773 /FEA=mRNA /CNT=174 /TID=Mm.18249.1 /TIER=Stack /STK=60 /UG=Mm.18249 /LL=76356 /UG_GENE=2610027H02Rik /UG_TITLE=RIKEN cDNA 2610027H02 gene /DEF=Mus musculus 10 days embryo whole body cDNA, RIKEN full-length enriched library, clone:2610027H02:homolog to ALPHA-FODRIN, full insert sequence.
1454628_at	control	10.0021	11.9934	PPP-AAA	303.03	38.9052	25.27	28.2847	261.3	338.3	309.5	10.1	7.8	57.9	A930037G23Rik	RIKEN cDNA A930037G23 gene	6	6 F3	125110859, 125110869	BE957307	320678	8889548, 10349636, 11042159, 11076861, 11217851, 12466851, 12477932, 15782199, 16141072, 16141073	GO:0005198: structural molecule activity		gb:BB540933 /DB_XREF=gi:15412219 /DB_XREF=BB540933 /CLONE=E130111C11 /FEA=EST /CNT=143 /TID=Mm.31395.2 /TIER=Stack /STK=115 /UG=Mm.31395 /LL=12876 /UG_GENE=Cpe /UG_TITLE=carboxypeptidase E
1433581_at	control	9.997	4.3169	PPP-PPP	950.73	115.79	220.23	51.1016	1063.1	957.3	831.8	278.7	197.9	184.1	1190002N15Rik	RIKEN cDNA 1190002N15 gene	9	9 E3.3	-94327216	AV309085	68861	10349636, 10922068, 11042159, 11076861, 11217851, 12466851, 16141072, 16141073			gb:BB500104 /DB_XREF=gi:16442268 /DB_XREF=BB500104 /CLONE=D630024N03 /FEA=EST /CNT=127 /TID=Mm.38211.1 /TIER=Stack /STK=87 /UG=Mm.38211 /UG_TITLE=ESTs
1458406_at	control	9.9963	4.2803	PPP-PPP	308.47	40.7792	72.07	3.8553	276.2	294.9	354.3	75.8	68.1	72.3	AI429294	expressed sequence AI429294	17			BG144063	106580				gb:BG144063 /DB_XREF=gi:12647463 /DB_XREF=ut68h01.x1 /CLONE=IMAGE:3333336 /FEA=EST /CNT=8 /TID=Mm.204761.1 /TIER=ConsEnd /STK=2 /UG=Mm.204761 /UG_TITLE=ESTs
1458832_at	control	9.9816	5.2109	PPP-PPP	522.13	72.3749	100.2	11.0666	439	571.1	556.3	89.5	99.5	111.6	Ghr	growth hormone receptor	15	15 A1	-3267759, -3277533	BB364131	14600	1354638, 1404614, 1639029, 1794046, 2739661, 2776481, 2825030, 3200842, 7529079, 7588264, 7664676, 7706460, 7721793, 7733275, 7789316, 7835269, 7894338, 7910583, 7959737, 7988474, 8014591, 8016161, 8276403, 8288233, 8365377, 8661743, 8812413, 8827514, 8884266, 8921876, 8973143, 9005979, 9112397, 9144201, 9196007, 9371826, 9521872, 9657863, 9756919, 10067829, 10342852, 10349636, 10425445, 10448090…	GO:0006897: endocytosis, GO:0016020: membrane, GO:0016021: integral to membrane, GO:0019898: extrinsic to membrane, GO:0004872: receptor activity, GO:0004896: hematopoietin/interferon-class (D200-domain) cytokine receptor activity, GO:0005515: protein binding	04060: Cytokine-cytokine receptor interaction, 04080: Neuroactive ligand-receptor interaction, 04630: Jak-STAT signaling pathway	gb:BB364131 /DB_XREF=gi:16406206 /DB_XREF=BB364131 /CLONE=C130020E12 /FEA=EST /CNT=3 /TID=Mm.133397.1 /TIER=ConsEnd /STK=2 /UG=Mm.133397 /UG_TITLE=ESTs
1457276_at	control	9.9625	9.8686	PPP-PPP	1552.67	241.55	157.33	22.4242	1380	1828.7	1449.3	141	148.1	182.9	Snf1lk2	SNF1-like kinase 2	9	9 A5.3	-50645032	AI315692	235344	10349636, 11042159, 11076861, 11217851, 12466851, 12624099, 16141072, 16141073	GO:0006468: protein amino acid phosphorylation, GO:0007243: protein kinase cascade, GO:0008286: insulin receptor signaling pathway, GO:0046626: regulation of insulin receptor signaling pathway, GO:0005634: nucleus, GO:0005737: cytoplasm, GO:0000166: nucleotide binding, GO:0000287: magnesium ion binding, GO:0004672: protein kinase activity, GO:0004674: protein serine/threonine kinase activity, GO:…		gb:AI315692 /DB_XREF=gi:4030959 /DB_XREF=uj37h06.x1 /CLONE=IMAGE:1922171 /FEA=EST /CNT=18 /TID=Mm.38316.1 /TIER=ConsEnd /STK=4 /UG=Mm.38316 /UG_TITLE=ESTs, Moderately similar to KIAA0781 protein (H.sapiens)
1445492_at	control	9.959	3.1244	PPP-PPP	736	67.1083	235.57	55.4207	800.8	666.8	740.4	208.7	198.7	299.3	Mapre2	microtubule-associated protein, RP/EB family, member 2	18	18 A2	23946993	BE956567	212307	8858346, 8889548, 10349636, 11042159, 11076861, 11217851, 12466851, 12477932, 15782199, 15789376, 16141072, 16141073, 16148041	GO:0007049: cell cycle, GO:0007067: mitosis, GO:0051301: cell division, GO:0005874: microtubule, GO:0005515: protein binding, GO:0008017: microtubule binding		gb:BE956567 /DB_XREF=gi:10601240 /DB_XREF=UI-M-BG2-bbl-g-07-0-UI.s1 /CLONE=UI-M-BG2-bbl-g-07-0-UI /FEA=EST /CNT=3 /TID=Mm.54206.1 /TIER=ConsEnd /STK=2 /UG=Mm.54206 /UG_TITLE=ESTs
1436101_at	control	9.9325	3.539	MAP-AAA	639.5	78.2338	180.7	16.7472	621.7	571.7	725.1	191.4	161.4	189.3	Pank2	pantothenate kinase 2 (Hallervorden-Spatz syndrome)	2	2 F1	130953940	BB752033	74450	8889548, 10349636, 11042159, 11076861, 11217851, 11479594, 12466851, 12477932, 15525657, 15782199, 16141072, 16141073	GO:0015937: coenzyme A biosynthetic process, GO:0004594: pantothenate kinase activity, GO:0005524: ATP binding, GO:0016301: kinase activity	00770: Pantothenate and CoA biosynthesis	gb:BB752033 /DB_XREF=gi:16200507 /DB_XREF=BB752033 /CLONE=G270009H10 /FEA=EST /CNT=15 /TID=Mm.28410.2 /TIER=Stack /STK=11 /UG=Mm.28410 /LL=72839 /UG_GENE=2810473M14Rik /UG_TITLE=RIKEN cDNA 2810473M14 gene
1419370_a_at	control	9.9298	1.6164	PPP-PPP	1341.93	79.507	830.2	40.5733	1433.7	1293.7	1298.4	866.5	837.7	786.4	Mfap1a	microfibrillar-associated protein 1A	2	2 F1	-121184121	BB436326	67532	10349636, 11042159, 11076861, 11217851, 12466851, 12477932, 16141072, 16141073	GO:0005576: extracellular region, GO:0005578: extracellular matrix (sensu Metazoa), GO:0005201: extracellular matrix structural constituent		gb:BB436326 /DB_XREF=gi:16424387 /DB_XREF=BB436326 /CLONE=C820018D21 /FEA=FLmRNA /CNT=93 /TID=Mm.96671.1 /TIER=ConsEnd /STK=1 /UG=Mm.96671 /LL=67532 /UG_GENE=Mfap1 /UG_TITLE=microfibrillar-associated protein 1 /FL=gb:BC005728.1 gb:NM_026220.1
1415871_at	control	9.9201	7.9088	PPP-PPP	1092.2	161.348	138.1	41.4457	905.9	1186.9	1183.8	145.1	175.6	93.6	Tgfbi	transforming growth factor, beta induced	13	13 38.0 cM	56619230	NM_009369	21810	8024701, 10349636, 10913330, 10922068, 11042159, 11076861, 11217851, 11353389, 11598925, 12466851, 12704192, 12838408, 12963107, 14531791, 14967934, 15328023, 15604097, 15780949, 15907457, 16141072, 16141073, 16537572	GO:0007155: cell adhesion, GO:0005578: extracellular matrix (sensu Metazoa), GO:0005615: extracellular space, GO:0005615: extracellular space, GO:0005515: protein binding		gb:NM_009369.1 /DB_XREF=gi:6678320 /GEN=Tgfbi /FEA=FLmRNA /CNT=272 /TID=Mm.14455.1 /TIER=FL+Stack /STK=191 /UG=Mm.14455 /LL=21810 /DEF=Mus musculus transforming growth factor, beta induced, 68 kDa (Tgfbi), mRNA. /PROD=transforming growth factor, beta induced, 68kDa /FL=gb:L19932.1 gb:NM_009369.1
1439591_at	control	9.9082	1.5562	PPP-PPP	295.47	15.4047	189.87	10.1717	303.6	277.7	305.1	200.4	180.1	189.1	Ulk2	Unc-51 like kinase 2 (C. elegans)	11	11 B2	-61591854	BB534581	29869	8889548, 9600096, 10349636, 10557072, 10624947, 10725249, 10922068, 11042159, 11076861, 11217851, 12466851, 12477932, 12693553, 15782199, 16141072, 16141073	GO:0006468: protein amino acid phosphorylation, GO:0000166: nucleotide binding, GO:0004672: protein kinase activity, GO:0004674: protein serine/threonine kinase activity, GO:0005524: ATP binding, GO:0016301: kinase activity, GO:0016740: transferase activity	04140: Regulation of autophagy, 04150: mTOR signaling pathway	gb:BB534581 /DB_XREF=gi:16446412 /DB_XREF=BB534581 /CLONE=E030037L18 /FEA=EST /CNT=8 /TID=Mm.162025.1 /TIER=ConsEnd /STK=7 /UG=Mm.162025 /UG_TITLE=ESTs
1446212_at	control	9.8945	4.3465	PPP-PPP	527.67	43.7819	121.4	56.0436	545.4	477.8	559.8	164.7	141.4	58.1	Ga17	dendritic cell protein GA17	2	2 E2	-104800497	BB204400	98221	7671812, 8889548, 10349636, 10568747, 10725249, 10922068, 11042159, 11076861, 11217851, 11889558, 12466851, 12477932, 15782199, 16141072, 16141073			gb:BB204400 /DB_XREF=gi:16351827 /DB_XREF=BB204400 /CLONE=A430057L14 /FEA=EST /CNT=2 /TID=Mm.207886.1 /TIER=ConsEnd /STK=2 /UG=Mm.207886 /UG_TITLE=ESTs
1456312_x_at	control	9.8792	28.1509	PPP-PPP	46852.5	7841.02	1664.33	1133.52	55853	43203.3	41501.1	1657.2	2801.4	534.4	Gsn	gelsolin	2	2 B	35104448	AV224521	227753	1315305, 2546951, 7698245, 7720072, 7774911, 8075499, 8088777, 8799160, 9811942, 9819354, 9927495, 10024874, 10349636, 10417819, 10431814, 10556799, 10559185, 10684249, 10922068, 10946270, 10985859, 11042159, 11076861, 11130978, 11217851, 11423996, 11514591, 12270712, 12466851, 12477932, 12578912, 12654637, 14617805, 14962741, 15294161, 15671163, 15782199, 16059910, 16120646, 16141072, 16141073, …	GO:0016192: vesicle-mediated transport, GO:0030041: actin filament polymerization, GO:0051014: actin filament severing, GO:0051014: actin filament severing, GO:0051016: barbed-end actin filament capping, GO:0051016: barbed-end actin filament capping, GO:0005576: extracellular region, GO:0005615: extracellular space, GO:0005737: cytoplasm, GO:0005829: cytosol, GO:0005856: cytoskeleton, GO:0015629:…	04810: Regulation of actin cytoskeleton	gb:AV224521 /DB_XREF=gi:6173899 /DB_XREF=AV224521 /CLONE=3830421D13 /FEA=EST /CNT=12 /TID=Mm.21109.4 /TIER=Stack /STK=12 /UG=Mm.21109 /LL=14851 /UG_GENE=Gsn /UG_TITLE=gelsolin
1460256_at	control	9.8712	43.116	PPP-PPP	31821.1	5426.88	738.03	542.835	37522.5	31222.3	26718.4	1092.5	1008.5	113.1	Car3	carbonic anhydrase 3	3	3 A2	14840281	NM_007606	12350	1901785, 1916821, 2111277, 2496681, 2852973, 7717866, 8889548, 9020864, 9021147, 9651514, 10349636, 11042159, 11076861, 11217851, 11255005, 12466851, 12477932, 12571105, 12930737, 15509796, 16141072, 16141073, 16247769, 16829211, 16945627	GO:0006730: one-carbon compound metabolic process, GO:0004089: carbonate dehydratase activity, GO:0008270: zinc ion binding, GO:0016151: nickel ion binding, GO:0016829: lyase activity, GO:0046872: metal ion binding	00910: Nitrogen metabolism	gb:NM_007606.1 /DB_XREF=gi:6671675 /GEN=Car3 /FEA=FLmRNA /CNT=422 /TID=Mm.300.1 /TIER=FL+Stack /STK=10 /UG=Mm.300 /LL=12350 /DEF=Mus musculus carbonic anhydrase 3 (Car3), mRNA. /PROD=carbonic anhydrase 3 /FL=gb:BC011129.1 gb:NM_007606.1 gb:M27796.1
1457198_at	control	9.8666	4.1099	PPP-PPP	1568.6	198.788	381.67	62.4358	1736.5	1349.1	1620.2	374.2	447.5	323.3	Nrp1	neuropilin 1	8	8 E	131245329	AV291009	18186	8575331, 8748368, 9288753, 9331348, 9390514, 9742149, 9753685, 9811588, 10229225, 10328887, 10349636, 10409677, 10518505, 10675351, 10705382, 10707970, 10725340, 11025205, 11027230, 11042159, 11076861, 11084652, 11160433, 11165481, 11217851, 11231073, 11238106, 11442635, 11461151, 11688557, 11756651, 11786422, 11804779, 11830568, 11891274, 11906695, 11939589, 12036513, 12093729, 12118260, 1236197…	GO:0001525: angiogenesis, GO:0007155: cell adhesion, GO:0007275: multicellular organismal development, GO:0007399: nervous system development, GO:0007411: axon guidance, GO:0007507: heart development, GO:0016358: dendrite development, GO:0016477: cell migration, GO:0030154: cell differentiation, GO:0030517: negative regulation of axon extension, GO:0048010: vascular endothelial growth factor rece…	04360: Axon guidance	gb:AV291009 /DB_XREF=gi:16392354 /DB_XREF=AV291009 /CLONE=5330401L20 /FEA=EST /CNT=5 /TID=Mm.212348.1 /TIER=ConsEnd /STK=5 /UG=Mm.212348 /UG_TITLE=ESTs
1435116_at	control	9.8619	4.1859	PPP-PAA	100.6	7.1393	24.03	11.3958	108.3	94.2	99.3	32.6	28.4	11.1	4933403G14Rik	RIKEN cDNA 4933403G14 gene	8	8 E2	128555955	BB219003	74393	8889548, 10349636, 11042159, 11076861, 11217851, 12466851, 16141072, 16141073	GO:0005615: extracellular space		gb:BB219003 /DB_XREF=gi:16353360 /DB_XREF=BB219003 /CLONE=A530052E22 /FEA=EST /CNT=28 /TID=Mm.41709.1 /TIER=Stack /STK=20 /UG=Mm.41709 /LL=102150 /UG_GENE=AI835009 /UG_TITLE=expressed sequence AI835009
1447841_x_at	control	9.8524	3.215	PPP-AAA	520.83	56.452	162	28.1533	542.8	563	456.7	173.6	182.5	129.9	St3gal6	ST3 beta-galactoside alpha-2,3-sialyltransferase 6	16	16 C1.2	-58413086	BB532866	54613	8889548, 10349636, 10619706, 10894948, 10922068, 11042159, 11076861, 11217851, 12466851, 12477932, 15782199, 16141072, 16141073	GO:0006486: protein amino acid glycosylation, GO:0016020: membrane, GO:0016021: integral to membrane, GO:0030173: integral to Golgi membrane, GO:0008373: sialyltransferase activity, GO:0008373: sialyltransferase activity, GO:0016740: transferase activity, GO:0016757: transferase activity, transferring glycosyl groups	00602: Glycosphingolipid biosynthesis - neo-lactoseries, 01031: Glycan structures - biosynthesis 2	gb:BB532866 /DB_XREF=gi:9584795 /DB_XREF=BB532866 /CLONE=E030027C15 /FEA=EST /CNT=2 /TID=Mm.170020.1 /TIER=ConsEnd /STK=2 /UG=Mm.170020 /UG_TITLE=ESTs
1435263_at	control	9.8446	5.6591	PPP-AAA	634.77	91.8976	112.17	2.9771	666.1	706.9	531.3	115.6	110.6	110.3	Tmem106a	transmembrane protein 106A	11	11 D	101398331	AV024335	217203	10349636, 11042159, 11076861, 11217851, 12466851, 12477932, 16141072, 16141073	GO:0016020: membrane, GO:0016021: integral to membrane		gb:AV024335 /DB_XREF=gi:15431394 /DB_XREF=AV024335 /CLONE=1200002G11 /FEA=EST /CNT=28 /TID=Mm.220967.1 /TIER=Stack /STK=18 /UG=Mm.220967 /LL=103625 /UG_GENE=AI043106 /UG_TITLE=expressed sequence AI043106
1438405_at	control	9.8399	2.155	PPP-PPP	326.7	23.6406	151.6	19.776	351.1	303.9	325.1	153.6	130.9	170.3	Fgf7	fibroblast growth factor 7	2	2 F-G	125726224	BB791906	14178	1846048, 2475908, 2915979, 7604876, 7640656, 7655084, 7681397, 7749227, 8170478, 8186145, 8566750, 8585128, 8883961, 8901049, 9000125, 9006067, 9056643, 9332392, 9385055, 9428423, 9500453, 9547510, 9740653, 9788974, 9876183, 10349636, 10525187, 10572052, 10588868, 10668924, 10766812, 10821755, 10964474, 10984614, 11042159, 11066089, 11076861, 11165488, 11217851, 11335076, 11489975, 11698278, 1173…	GO:0000074: regulation of progression through cell cycle, GO:0007165: signal transduction, GO:0008283: cell proliferation, GO:0008284: positive regulation of cell proliferation, GO:0005576: extracellular region, GO:0005615: extracellular space, GO:0005794: Golgi apparatus, GO:0005104: fibroblast growth factor receptor binding, GO:0008083: growth factor activity	04010: MAPK signaling pathway, 04810: Regulation of actin cytoskeleton, 05218: Melanoma	gb:BB791906 /DB_XREF=gi:16960611 /DB_XREF=BB791906 /CLONE=G430138M20 /FEA=EST /CNT=25 /TID=Mm.117395.1 /TIER=Stack /STK=10 /UG=Mm.117395 /UG_TITLE=ESTs
1427495_at	control	9.8035	14.7016	PPP-PAA	908.07	143.56	61.77	41.7998	756.1	1041.4	926.7	109.9	40.8	34.6	Scn7a	sodium channel, voltage-gated, type VII, alpha	2	2 C1.3	-66476150	BB655734	20272	7590978, 7982916, 8250913, 8779936, 9726281, 10198179, 10349636, 11027237, 11042159, 11076861, 11217851, 11992118, 12213645, 12466851, 12650985, 15496663, 16141072, 16141073, 16223844	GO:0006811: ion transport, GO:0006812: cation transport, GO:0006814: sodium ion transport, GO:0006816: calcium ion transport, GO:0001518: voltage-gated sodium channel complex, GO:0016020: membrane, GO:0016021: integral to membrane, GO:0005216: ion channel activity, GO:0005248: voltage-gated sodium channel activity, GO:0005261: cation channel activity, GO:0005262: calcium channel activity		gb:BB655734 /DB_XREF=gi:16489562 /DB_XREF=BB655734 /CLONE=D130020M11 /FEA=mRNA /CNT=14 /TID=Mm.153466.1 /TIER=ConsEnd /STK=0 /UG=Mm.153466 /LL=20272 /UG_GENE=Scn6a /UG_TITLE=sodium channel, voltage-gated, type VI, alpha polypeptide
1437644_at	control	9.7884	37.792	PPP-AAA	345.17	58.3658	9.13	11.358	303.1	320.6	411.8	4.9	0.5	22	B3galt2	UDP-Gal:betaGlcNAc beta 1,3-galactosyltransferase, polypeptide 2	1	1 F	145402960	BB083643	26878	9417047, 10349636, 11042159, 11076861, 11217851, 12466851, 12477932, 12633872, 16141072, 16141073	GO:0006486: protein amino acid glycosylation, GO:0009312: oligosaccharide biosynthetic process, GO:0016020: membrane, GO:0016021: integral to membrane, GO:0008378: galactosyltransferase activity, GO:0008499: UDP-galactose:beta-N-acetylglucosamine beta-1,3-galactosyltransferase activity, GO:0016740: transferase activity, GO:0016757: transferase activity, transferring glycosyl groups, GO:0030145: m…	00601: Glycosphingolipid biosynthesis - lactoseries, 01031: Glycan structures - biosynthesis 2	gb:BB083643 /DB_XREF=gi:15407640 /DB_XREF=BB083643 /CLONE=9330184D19 /FEA=EST /CNT=23 /TID=Mm.123510.2 /TIER=Stack /STK=15 /UG=Mm.123510 /LL=26878 /UG_GENE=B3galt2 /UG_TITLE=UDP-Gal:betaGlcNAc beta 1,3-galactosyltransferase, polypeptide 2
1435990_at	control	9.7623	32.6538	APP-AAA	367.9	63.26	11.27	1.3577	346	439.2	318.5	10	12.7	11.1	Adamts2	a disintegrin-like and metallopeptidase (reprolysin type) with thrombospondin type 1 motif, 2	11	11 B1.3	50445507	BG073461	216725	10349636, 10464288, 10922068, 11042159, 11076861, 11217851, 11284712, 11831030, 12466851, 12477932, 16141072, 16141073, 16452166, 16556917	GO:0006508: proteolysis, GO:0007229: integrin-mediated signaling pathway, GO:0007283: spermatogenesis, GO:0030199: collagen fibril organization, GO:0030324: lung development, GO:0030574: collagen catabolic process, GO:0043588: skin development, GO:0051605: protein maturation via proteolysis, GO:0005578: extracellular matrix (sensu Metazoa), GO:0031012: extracellular matrix, GO:0004222: metalloend…		gb:BG073461 /DB_XREF=gi:12556030 /DB_XREF=H3122H02-3 /CLONE=H3122H02 /FEA=EST /CNT=17 /TID=Mm.23038.1 /TIER=Stack /STK=12 /UG=Mm.23038 /UG_TITLE=ESTs
1424680_at	control	9.7427	7.3978	AAP-AAA	133.9	15.3039	18.1	13.7699	118.4	134.3	149	26.1	26	2.2	BB146404	expressed sequence BB146404	10	10 B1	-33780767	BC025893	103511	10349636, 11042159, 11076861, 11217851, 12466851, 12477932, 16141072, 16141073	GO:0016020: membrane, GO:0016021: integral to membrane		gb:BC025893.1 /DB_XREF=gi:19483988 /FEA=FLmRNA /CNT=34 /TID=Mm.66334.1 /TIER=FL+Stack /STK=20 /UG=Mm.66334 /DEF=Mus musculus, similar to unnamed protein product, clone MGC:32360 IMAGE:5031155, mRNA, complete cds. /PROD=similar to unnamed protein product /FL=gb:BC025893.1
1441727_s_at	control	9.7268	6.3193	PPP-PAP	1113.47	123.623	176.2	112.129	1015.3	1072.8	1252.3	195.7	55.6	277.3	Zfp467	zinc finger protein 467	6	6 B2.3	-48367171	BE628275	68910	8889548, 10349636, 11042159, 11076861, 11217851, 12426389, 12466851, 12477932, 15618518, 15782199, 16141072, 16141073	GO:0006350: transcription, GO:0006355: regulation of transcription, DNA-dependent, GO:0045449: regulation of transcription, GO:0005622: intracellular, GO:0005634: nucleus, GO:0003676: nucleic acid binding, GO:0003677: DNA binding, GO:0005515: protein binding, GO:0008270: zinc ion binding, GO:0046872: metal ion binding		gb:BE628275 /DB_XREF=gi:9908538 /DB_XREF=uu28f01.x1 /CLONE=IMAGE:3373273 /FEA=EST /CNT=4 /TID=Mm.200881.1 /TIER=ConsEnd /STK=4 /UG=Mm.200881 /LL=68910 /UG_GENE=1190001I08Rik /UG_TITLE=RIKEN cDNA 1190001I08 gene
1443272_at	control	9.7236	2.7112	APP-AAA	66.33	5.9003	24.47	4.5611	72.2	60.4	66.4	24.1	20.1	29.2	Nope	neighbor of Punc E11	9	9 C	64899540	BB550296	56741	8889548, 9027501, 9922388, 10349636, 10708514, 11042159, 11076861, 11217851, 12466851, 12477932, 12693553, 16141072, 16141073	GO:0007155: cell adhesion, GO:0005887: integral to plasma membrane, GO:0016020: membrane, GO:0016021: integral to membrane, GO:0005515: protein binding		gb:BB550296 /DB_XREF=gi:16447901 /DB_XREF=BB550296 /CLONE=E230021G18 /FEA=EST /CNT=3 /TID=Mm.210022.1 /TIER=ConsEnd /STK=3 /UG=Mm.210022 /UG_TITLE=ESTs
1445781_at	control	9.7209	2.238	PAP-AAA	440.97	25.0011	197.03	35.5534	467.9	418.5	436.5	184.3	237.2	169.6	Sh3d19	SH3 domain protein D19	3	3 F1		BG072274	27059	10349636, 10922068, 11042159, 11076861, 11125038, 11217851, 12466851, 12477932, 12615363, 16141072, 16141073, 16707424	GO:0008150: biological_process, GO:0005575: cellular_component, GO:0003674: molecular_function		gb:BG072274 /DB_XREF=gi:12554843 /DB_XREF=H3108G02-3 /CLONE=H3108G02 /FEA=EST /CNT=3 /TID=Mm.173929.1 /TIER=ConsEnd /STK=2 /UG=Mm.173929 /UG_TITLE=ESTs
1434510_at	control	9.7191	22.9633	PPP-PPA	2064.4	349.773	89.9	38.4118	1686.4	2130.2	2376.6	115.2	108.8	45.7	Papss2	3'-phosphoadenosine 5'-phosphosulfate synthase 2	19	19 C1	32686001	BF780807	23972	67117, 230515, 273256, 624676, 939824, 1269836, 1818763, 3998439, 4436535, 5713631, 6119797, 6391574, 7202842, 7274657, 7827052, 8043950, 8835524, 9248858, 9671738, 9771708, 10349636, 10399321, 10559207, 10679223, 10773105, 11042159, 11076861, 11217851, 11518254, 12466851, 12477932, 15944189, 16141072, 16141073	GO:0000103: sulfate assimilation, GO:0001501: skeletal development, GO:0005622: intracellular, GO:0000166: nucleotide binding, GO:0003824: catalytic activity, GO:0004020: adenylylsulfate kinase activity, GO:0004781: sulfate adenylyltransferase (ATP) activity, GO:0004781: sulfate adenylyltransferase (ATP) activity, GO:0005524: ATP binding, GO:0005524: ATP binding, GO:0016301: kinase activity, GO:0…	00230: Purine metabolism, 00450: Selenoamino acid metabolism, 00920: Sulfur metabolism	gb:BF780807 /DB_XREF=gi:12085840 /DB_XREF=602103086F1 /CLONE=IMAGE:4221452 /FEA=EST /CNT=63 /TID=Mm.203916.1 /TIER=Stack /STK=30 /UG=Mm.203916 /LL=107125 /UG_GENE=AI159688 /UG_TITLE=expressed sequence AI159688
1450430_at	control	9.7037	6.1921	PPP-PPP	2447.73	147.355	395.3	335.404	2590.4	2296.1	2456.7	731.6	393.5	60.8	Mrc1	mannose receptor, C type 1	2	2 A2	14147167	NM_008625	17533	1421407, 7635954, 8297379, 9354684, 9560474, 10349636, 10381505, 11042159, 11076861, 11217851, 11805139, 11884756, 12466851, 12496194, 14573639, 15746201, 15983039, 16116224, 16141072, 16141073, 16619293, 16864654, 17015822	GO:0006897: endocytosis, GO:0005615: extracellular space, GO:0009986: cell surface, GO:0016020: membrane, GO:0016021: integral to membrane, GO:0004872: receptor activity, GO:0004888: transmembrane receptor activity, GO:0005509: calcium ion binding, GO:0005529: sugar binding, GO:0005537: mannose binding		gb:NM_008625.1 /DB_XREF=gi:6678931 /GEN=Mrc1 /FEA=FLmRNA /CNT=33 /TID=Mm.2019.1 /TIER=FL /STK=1 /UG=Mm.2019 /LL=17533 /DEF=Mus musculus mannose receptor, C type 1 (Mrc1), mRNA. /PROD=mannose receptor, C type 1 /FL=gb:NM_008625.1
1452828_at	control	9.6862	4.2747	PPP-PAM	1373.73	187.403	321.37	17.0969	1531.3	1423.4	1166.5	341.1	312	311	Fbxo21	F-box protein 21	5	5 F	118237799	BG076338	231670	8889548, 10349636, 10725249, 10922068, 11042159, 11076861, 11217851, 12465718, 12466851, 12477932, 15520277, 15782199, 16141072, 16141073	GO:0006512: ubiquitin cycle		gb:BG076338 /DB_XREF=gi:12558907 /DB_XREF=H3158E10-3 /CLONE=H3158E10 /FEA=mRNA /CNT=80 /TID=Mm.21912.1 /TIER=Stack /STK=33 /UG=Mm.21912 /LL=76973 /UG_GENE=2810425J22Rik /UG_TITLE=RIKEN cDNA 2810425J22 gene
1452761_a_at	control	9.6772	3.4463	PPP-PPP	1839.97	181.468	533.9	147.359	1669.6	2030.8	1819.5	682.2	532	387.5	8430436O14Rik	RIKEN cDNA 8430436O14 gene	9			AK018466	71506	10349636, 11042159, 11076861, 11217851, 12466851, 16141072, 16141073			gb:AK018466.1 /DB_XREF=gi:12858179 /FEA=mRNA /CNT=65 /TID=Mm.99916.1 /TIER=Stack /STK=48 /UG=Mm.99916 /LL=71506 /UG_GENE=8430436O14Rik /UG_TITLE=RIKEN cDNA 8430436O14 gene /DEF=Mus musculus 16 days embryo lung cDNA, RIKEN full-length enriched library, clone:8430436O14:unclassifiable transcript, full insert sequence.
1421555_at	control	9.6637	11.5609	PPP-AAA	876.7	141.308	75.83	25.2264	992.1	719.1	918.9	101.7	74.5	51.3	Adrb3	adrenergic receptor, beta 3	8	8 A2-A4	-28691711	NM_013462	11556	1290451, 1336117, 1718744, 7493988, 7733225, 7733267, 7738011, 8202547, 8389293, 8666142, 8680474, 8969197, 9002984, 9133593, 9200670, 9276726, 9305858, 9305915, 9606417, 9726236, 9826121, 10198177, 10349636, 10358009, 10441518, 10455305, 10714358, 10800773, 10842103, 10948198, 10974023, 11042159, 11076861, 11217851, 11713213, 11716511, 11737201, 11997176, 12161655, 12387862, 12466851, 12943691, …	GO:0002024: diet induced thermogenesis, GO:0002025: norepinephrine-epinephrine vasodilation during regulation of blood pressure, GO:0007165: signal transduction, GO:0007186: G-protein coupled receptor protein signaling pathway, GO:0007189: G-protein signaling, adenylate cyclase activating pathway, GO:0007190: adenylate cyclase activation, GO:0009409: response to cold, GO:0031649: heat generation,…	04020: Calcium signaling pathway, 04080: Neuroactive ligand-receptor interaction	gb:NM_013462.1 /DB_XREF=gi:7304870 /GEN=Adrb3 /FEA=FLmRNA /CNT=4 /TID=Mm.4369.1 /TIER=FL /STK=2 /UG=Mm.4369 /LL=11556 /DEF=Mus musculus adrenergic receptor, beta 3 (Adrb3), mRNA. /PROD=adrenergic receptor, beta 3 /FL=gb:AF193027.1 gb:NM_013462.1
1458941_at	control	9.6365	5.7075	PPP-PPP	1097.37	154.876	192.27	49.7872	919.5	1202.4	1170.2	217.7	224.2	134.9	Zeb2	zinc finger E-box binding homeobox 2	2	2 C1	-44805740, -44805642	BB456871	24136	8889548, 10349636, 10400677, 11042159, 11076861, 11217851, 11448942, 11451567, 11477103, 11592033, 11857784, 12466851, 12477932, 12522767, 12609600, 12693553, 13679026, 15006694, 15489854, 16127714, 16141072, 16141073, 16157277, 16162653, 16458080, 16516881, 16598713, 16919269, 16957952	GO:0001755: neural crest cell migration, GO:0001756: somitogenesis, GO:0001843: neural tube closure, GO:0006350: transcription, GO:0006355: regulation of transcription, DNA-dependent, GO:0007417: central nervous system development, GO:0016481: negative regulation of transcription, GO:0045449: regulation of transcription, GO:0048598: embryonic morphogenesis, GO:0005622: intracellular, GO:0005634: …		gb:BB456871 /DB_XREF=gi:16426095 /DB_XREF=BB456871 /CLONE=D130048N16 /FEA=EST /CNT=3 /TID=Mm.129836.1 /TIER=ConsEnd /STK=2 /UG=Mm.129836 /UG_TITLE=ESTs
1436324_at	control	9.6332	3.2664	PPP-PPP	442.27	36.8378	135.4	41.0757	426.9	415.6	484.3	169.5	89.8	146.9	Stard9	START domain containing 9	2	2 F1		BB427728	211824	7514534, 9275178, 10349636, 11042159, 11076861, 11217851, 11416179, 12466851, 12477932, 12693553, 16141072, 16141073	GO:0007017: microtubule-based process, GO:0007018: microtubule-based movement, GO:0005871: kinesin complex, GO:0005874: microtubule, GO:0005875: microtubule associated complex, GO:0000166: nucleotide binding, GO:0003774: motor activity, GO:0003777: microtubule motor activity, GO:0005524: ATP binding		gb:BB427728 /DB_XREF=gi:16423843 /DB_XREF=BB427728 /CLONE=C630013H16 /FEA=EST /CNT=40 /TID=Mm.66314.1 /TIER=Stack /STK=9 /UG=Mm.66314 /UG_TITLE=ESTs, Moderately similar to T43486 hypothetical protein DKFZp434N1272.1 (H.sapiens)
1437171_x_at	control	9.6118	33.292	PPP-PPP	40515.3	7048.03	1216.97	688.42	47906.4	33869.6	39769.8	1391.1	1801.6	458.2	Gsn	gelsolin	2	2 B	35104448	AV025667	227753	1315305, 2546951, 7698245, 7720072, 7774911, 8075499, 8088777, 8799160, 9811942, 9819354, 9927495, 10024874, 10349636, 10417819, 10431814, 10556799, 10559185, 10684249, 10922068, 10946270, 10985859, 11042159, 11076861, 11130978, 11217851, 11423996, 11514591, 12270712, 12466851, 12477932, 12578912, 12654637, 14617805, 14962741, 15294161, 15671163, 15782199, 16059910, 16120646, 16141072, 16141073, …	GO:0016192: vesicle-mediated transport, GO:0030041: actin filament polymerization, GO:0051014: actin filament severing, GO:0051014: actin filament severing, GO:0051016: barbed-end actin filament capping, GO:0051016: barbed-end actin filament capping, GO:0005576: extracellular region, GO:0005615: extracellular space, GO:0005737: cytoplasm, GO:0005829: cytosol, GO:0005856: cytoskeleton, GO:0015629:…	04810: Regulation of actin cytoskeleton	gb:AV025667 /DB_XREF=gi:4802659 /DB_XREF=AV025667 /CLONE=1200014O16 /FEA=EST /CNT=24 /TID=Mm.21109.3 /TIER=Stack /STK=24 /UG=Mm.21109 /LL=14851 /UG_GENE=Gsn /UG_TITLE=gelsolin
1431300_at	control	9.6103	4.2468	PPP-AAA	272.5	27.2743	64.17	25.8059	265.8	249.2	302.5	93.9	51	47.6	Sgip1	SH3-domain GRB2-like (endophilin) interacting protein 1	4	4 C6	102258294	AK014022	73094	8889548, 10349636, 11042159, 11076861, 11125038, 11217851, 12466851, 12477932, 15782199, 15919751, 16141072, 16141073	GO:0015074: DNA integration, GO:0003677: DNA binding, GO:0008270: zinc ion binding, GO:0008907: integrase activity		gb:AK014022.1 /DB_XREF=gi:12851642 /FEA=mRNA /CNT=5 /TID=Mm.214528.1 /TIER=ConsEnd /STK=0 /UG=Mm.214528 /LL=73094 /UG_GENE=3110007P09Rik /UG_TITLE=RIKEN cDNA 3110007P09 gene /DEF=Mus musculus 13 days embryo head cDNA, RIKEN full-length enriched library, clone:3110007P09:hypothetical protein, full insert sequence.
1425251_at	control	9.6064	8.0419	APA-AAA	57.63	5.3003	7.17	7.3962	53.9	63.7	55.3	3.2	2.6	15.7	Ptger3	prostaglandin E receptor 3 (subtype EP3)	3	3 H4	157502184	D17406	19218	1372606, 7515568, 7732847, 7733888, 7870313, 7910583, 7945376, 8076637, 8135729, 8203567, 8223569, 8307176, 8381413, 8396726, 8833158, 9116135, 9124591, 9348184, 9371744, 9606417, 9751056, 9843913, 10508233, 10535876, 10537280, 10593166, 10749873, 11123248, 11208722, 11375261, 11533709, 11535576, 11602631, 11809702, 11966527, 12208866, 12370397, 12466851, 12477932, 12538661, 12604682, 12618422, 1…	GO:0001660: fever, GO:0001660: fever, GO:0007165: signal transduction, GO:0007186: G-protein coupled receptor protein signaling pathway, GO:0007188: G-protein signaling, coupled to cAMP nucleotide second messenger, GO:0007200: G-protein signaling, coupled to IP3 second messenger (phospholipase C activating), GO:0007204: elevation of cytosolic calcium ion concentration, GO:0015701: bicarbonate tra…	04020: Calcium signaling pathway, 04080: Neuroactive ligand-receptor interaction	gb:D17406.1 /DB_XREF=gi:467519 /FEA=FLmRNA /CNT=6 /TID=Mm.30424.2 /TIER=FL /STK=4 /UG=Mm.30424 /LL=19218 /UG_GENE=Ptger3 /DEF=Mouse mRNA for prostaglandin E receptor EP3 subtype (EP3-gamma isoform), complete cds. /PROD=Mouse Prostaglandin E Receptor EP3 subtype(EP3-gamma isoform). /FL=gb:D17406.1
1433595_at	control	9.5864	1.7543	PPP-PAP	331.5	23.39	188.97	10.7751	321	358.3	315.2	200.4	179	187.5	Slc35d1	solute carrier family 35 (UDP-glucuronic acid/UDP-N-acetylgalactosamine dual transporter), member D1	4	4 C6	-102669649	BB409668	242585	8889548, 10349636, 11042159, 11076861, 11217851, 12466851, 12477932, 16141072, 16141073			gb:BB409668 /DB_XREF=gi:15411946 /DB_XREF=BB409668 /CLONE=C430014O21 /FEA=EST /CNT=94 /TID=Mm.28885.1 /TIER=Stack /STK=85 /UG=Mm.28885 /LL=100203 /UG_GENE=AI834976 /UG_TITLE=expressed sequence AI834976
1434172_at	control	9.5636	7.0845	PPP-AAA	315.73	45.6094	44.57	18.2105	352.8	264.8	329.6	64.4	40.7	28.6	Cnr1	cannabinoid receptor 1 (brain)	4	4 A5	34253244	BQ177934	12801	7568154, 8578601, 8777318, 8788864, 8835542, 8879486, 8889548, 9037253, 9096127, 9261404, 9888857, 10318961, 10318962, 10349636, 10499380, 10619457, 10712632, 10854287, 11042159, 11069600, 11076861, 11163634, 11214319, 11217851, 11279117, 11298451, 11359870, 11461969, 11516401, 11727768, 11734603, 11779037, 11823058, 11823890, 11890697, 11905991, 11976704, 11982628, 12060781, 12152079, 12163181, …	GO:0007165: signal transduction, GO:0007186: G-protein coupled receptor protein signaling pathway, GO:0016020: membrane, GO:0016021: integral to membrane, GO:0001584: rhodopsin-like receptor activity, GO:0004871: signal transducer activity, GO:0004872: receptor activity, GO:0004930: G-protein coupled receptor activity, GO:0004949: cannabinoid receptor activity	04080: Neuroactive ligand-receptor interaction	gb:BQ177934 /DB_XREF=gi:20353426 /DB_XREF=UI-M-ER0-bwq-o-13-0-UI.r1 /CLONE=IMAGE: 5700708 /FEA=EST /CNT=43 /TID=Mm.39940.1 /TIER=Stack /STK=40 /UG=Mm.39940 /UG_TITLE=ESTs
1436991_x_at	control	9.5481	33.9265	PPP-PPP	36305.8	6369.96	1070.13	528.456	43210	30657	35050.5	1208.7	1515.5	486.2	Gsn	gelsolin	2	2 B	35104448	AV025559	227753	1315305, 2546951, 7698245, 7720072, 7774911, 8075499, 8088777, 8799160, 9811942, 9819354, 9927495, 10024874, 10349636, 10417819, 10431814, 10556799, 10559185, 10684249, 10922068, 10946270, 10985859, 11042159, 11076861, 11130978, 11217851, 11423996, 11514591, 12270712, 12466851, 12477932, 12578912, 12654637, 14617805, 14962741, 15294161, 15671163, 15782199, 16059910, 16120646, 16141072, 16141073, …	GO:0016192: vesicle-mediated transport, GO:0030041: actin filament polymerization, GO:0051014: actin filament severing, GO:0051014: actin filament severing, GO:0051016: barbed-end actin filament capping, GO:0051016: barbed-end actin filament capping, GO:0005576: extracellular region, GO:0005615: extracellular space, GO:0005737: cytoplasm, GO:0005829: cytosol, GO:0005856: cytoskeleton, GO:0015629:…	04810: Regulation of actin cytoskeleton	gb:AV025559 /DB_XREF=gi:4802551 /DB_XREF=AV025559 /CLONE=1200014F04 /FEA=EST /CNT=33 /TID=Mm.21109.2 /TIER=Stack /STK=31 /UG=Mm.21109 /LL=14851 /UG_GENE=Gsn /UG_TITLE=gelsolin
1436618_at	control	9.5382	2.7886	PPP-PPP	445.43	39.4974	159.73	33.6389	480.6	453	402.7	121.6	185.2	172.4	Sfxn5	sideroflexin 5	6	6 35.59 cM	-85178711	BB379739	94282	10349636, 11042159, 11076861, 11217851, 11274051, 11920565, 12039050, 12466851, 12865426, 15533813, 16141072, 16141073	GO:0006810: transport, GO:0006811: ion transport, GO:0006812: cation transport, GO:0006826: iron ion transport, GO:0005739: mitochondrion, GO:0005739: mitochondrion, GO:0005743: mitochondrial inner membrane, GO:0016020: membrane, GO:0016021: integral to membrane, GO:0005506: iron ion binding, GO:0008324: cation transporter activity		gb:BB379739 /DB_XREF=gi:16407849 /DB_XREF=BB379739 /CLONE=C230001H08 /FEA=EST /CNT=16 /TID=Mm.41018.1 /TIER=Stack /STK=8 /UG=Mm.41018 /UG_TITLE=ESTs
1425848_a_at	control	9.5269	3.8729	PPP-AAA	203.07	20.1083	52.43	18.5918	216.9	180	212.3	73.9	41.9	41.5	Dusp26	dual specificity phosphatase 26 (putative)	8	8 A3	32555596	BC018204	66959	8889548, 10349636, 11042159, 11076861, 11217851, 12466851, 12477932, 15226823, 16141072, 16141073	GO:0006470: protein amino acid dephosphorylation, GO:0008138: protein tyrosine/serine/threonine phosphatase activity, GO:0016787: hydrolase activity		gb:BC018204.1 /DB_XREF=gi:17390455 /FEA=FLmRNA /CNT=3 /TID=Mm.23916.1 /TIER=FL /STK=1 /UG=Mm.23916 /LL=66959 /UG_GENE=2310043K02Rik /DEF=Mus musculus, Similar to hypothetical protein MGC1136, clone MGC:25607 IMAGE:4038120, mRNA, complete cds. /PROD=Similar to hypothetical protein MGC1136 /FL=gb:BC018204.1
1436555_at	control	9.5258	4.8415	PPP-PPP	1215.07	154.053	250.97	83.6506	1109.2	1144.2	1391.8	341.8	234	177.1	Slc7a2	solute carrier family 7 (cationic amino acid transporter, y+ system), member 2	8	8 A4	42361183, 42361209	AV244175	11988	1387105, 1694015, 1887331, 7568136, 7724615, 7941361, 8195186, 8382989, 8385111, 8417372, 8474450, 8672127, 8878860, 8954799, 9287114, 9334265, 9560283, 10349636, 10922068, 11042159, 11076861, 11217851, 11278602, 11829538, 12466851, 12477932, 12675924, 15631944, 15659399, 16141072, 16141073, 16239143, 16371438, 16670299, 16703566, 17003120	GO:0005975: carbohydrate metabolic process, GO:0006810: transport, GO:0006865: amino acid transport, GO:0015807: L-amino acid transport, GO:0016020: membrane, GO:0016021: integral to membrane, GO:0003824: catalytic activity, GO:0005279: amino acid-polyamine transporter activity, GO:0015171: amino acid transporter activity, GO:0015179: L-amino acid transporter activity, GO:0015359: amino acid perm…		gb:AV244175 /DB_XREF=gi:16386903 /DB_XREF=AV244175 /CLONE=4831428I20 /FEA=EST /CNT=22 /TID=Mm.16796.1 /TIER=Stack /STK=8 /UG=Mm.16796 /LL=101999 /UG_GENE=AI158848 /UG_TITLE=expressed sequence AI158848
1432944_at	control	9.5252	3.9579	PPP-PPP	344.87	39.7236	87.13	24.8687	387.9	337.1	309.6	98.6	104.2	58.6	2900046L07Rik	RIKEN cDNA 2900046L07 gene	15			AK013658	73027	10349636, 11042159, 11076861, 11217851, 12466851, 16141072, 16141073			gb:AK013658.1 /DB_XREF=gi:12851103 /FEA=mRNA /CNT=1 /TID=Mm.158927.1 /TIER=ConsEnd /STK=0 /UG=Mm.158927 /LL=73027 /UG_GENE=2900046L07Rik /UG_TITLE=RIKEN cDNA 2900046L07 gene /DEF=Mus musculus adult male hippocampus cDNA, RIKEN full-length enriched library, clone:2900046L07:unclassifiable transcript, full insert sequence.
1454799_at	control	9.501	120.349	PPP-AAA	5824.9	1052.76	48.4	25.2288	6173.3	6659.3	4642.1	22.1	72.4	50.7	A230097K15Rik	RIKEN cDNA A230097K15 gene	5	5 E4	101086530	AV300264	231510	10349636, 11042159, 11076861, 11217851, 12466851, 12477932, 16141072, 16141073	GO:0008152: metabolic process, GO:0008415: acyltransferase activity, GO:0016740: transferase activity		gb:AV300264 /DB_XREF=gi:15405905 /DB_XREF=AV300264 /CLONE=5730479B18 /FEA=EST /CNT=58 /TID=Mm.33759.2 /TIER=Stack /STK=46 /UG=Mm.33759 /LL=75802 /UG_GENE=4930458D05Rik /UG_TITLE=RIKEN cDNA 4930458D05 gene
1424677_at	control	9.4988	8.7469	PPP-PAA	232.67	33.0372	26.6	17.9008	241.2	196.2	260.6	44.6	26.4	8.8	Cyp2j9	cytochrome P450, family 2, subfamily j, polypeptide 9	4	4 C5	-96060448	AF336850	74519	8889548, 10349636, 11042159, 11076861, 11217851, 11328810, 12466851, 12477932, 16141072, 16141073	GO:0006118: electron transport, GO:0005783: endoplasmic reticulum, GO:0005792: microsome, GO:0016020: membrane, GO:0004497: monooxygenase activity, GO:0005506: iron ion binding, GO:0016491: oxidoreductase activity, GO:0016712: oxidoreductase activity, acting on paired donors, with incorporation or reduction of molecular oxygen, reduced flavin or flavoprotein as one donor, and incorporation of one…	00590: Arachidonic acid metabolism, 00591: Linoleic acid metabolism	gb:AF336850.1 /DB_XREF=gi:14317946 /FEA=FLmRNA /CNT=32 /TID=Mm.87271.1 /TIER=FL+Stack /STK=20 /UG=Mm.87271 /LL=74519 /UG_GENE=Cyp2j9 /DEF=Mus musculus cytochrome P450 CYP2J9 mRNA, complete cds. /PROD=cytochrome P450 CYP2J9 /FL=gb:AF336850.1
1433512_at	control	9.4867	5.7224	PPP-PPP	1811.33	203.996	316.53	181.295	1701.8	1685.5	2046.7	446.9	393.2	109.5	Fli1	Friend leukemia integration 1	9	9 A4	-32171774	BB138212	14247	1445800, 1845910, 1916807, 2044959, 2304901, 7558020, 8439553, 8439730, 8474456, 8524263, 8570653, 8649378, 8679708, 8838310, 8987796, 10095055, 10199918, 10349636, 10523830, 10640707, 10704859, 10757781, 10891501, 10981960, 11042159, 11076861, 11118632, 11217851, 11503960, 12065417, 12200699, 12379474, 12466851, 12466854, 12509448, 12527908, 14570912, 14635793, 14647452, 15367440, 15528390, 1555…	GO:0006350: transcription, GO:0006355: regulation of transcription, DNA-dependent, GO:0008015: circulation, GO:0009887: organ morphogenesis, GO:0009987: cellular process, GO:0005634: nucleus, GO:0003677: DNA binding, GO:0003700: transcription factor activity, GO:0016563: transcriptional activator activity, GO:0043565: sequence-specific DNA binding		gb:BB138212 /DB_XREF=gi:15408488 /DB_XREF=BB138212 /CLONE=9830146N17 /FEA=EST /CNT=119 /TID=Mm.119781.2 /TIER=Stack /STK=113 /UG=Mm.119781 /LL=14247 /UG_GENE=Fli1 /UG_TITLE=Friend leukemia integration 1
1425468_at	control	9.4827	5.1499	MPA-AAA	249.6	20.092	48.47	30.7567	228.1	252.8	267.9	67.8	64.6	13	Plp1	proteolipid protein (myelin) 1	X	X F1-F2	132169199	BB768495	18823	599283, 971429, 1150661, 1206429, 1280107, 1280689, 1280692, 1333116, 1353738, 1374119, 1375190, 1377711, 1380672, 1396170, 1549575, 1565842, 1675194, 1679744, 1688931, 1694232, 1705211, 1706246, 1721567, 1723945, 1737990, 1794058, 1890702, 1944806, 2076671, 2230077, 2230805, 2364893, 2411865, 2425262, 2441390, 2442307, 2444462, 2444499, 2445921, 2449535, 2451027, 2579194, 2670252, 2721933, 28995…	GO:0007268: synaptic transmission, GO:0008366: axon ensheathment, GO:0008366: axon ensheathment, GO:0022010: myelination in the central nervous system, GO:0042552: myelination, GO:0042552: myelination, GO:0042759: long-chain fatty acid biosynthetic process, GO:0048469: cell maturation, GO:0016020: membrane, GO:0016021: integral to membrane, GO:0043209: myelin sheath, GO:0005198: structural molecu…		gb:M15442.1 /DB_XREF=gi:200410 /FEA=FLmRNA /CNT=272 /TID=Mm.1268.1 /TIER=FL+Stack /STK=10 /UG=Mm.1268 /LL=18823 /UG_GENE=Plp /DEF=Mouse myelin proteolipid protein mRNA, complete cds. /PROD=myelin proteolipid protein /FL=gb:M14674.1 gb:M15442.1 gb:BC027010.1
1417129_a_at	control	9.4699	11.7798	PPP-AAA	299.6	37.326	25.43	33.4865	321.3	321	256.5	64.1	6.2	6	Mrg1	myeloid ecotropic viral integration site-related gene 1	2	2 E4	-115554509	U68384	17536	7649373, 8950991, 9049632, 9337137, 9337138, 10021349, 10349636, 10586884, 10654602, 10727869, 10842069, 11042159, 11044609, 11076861, 11101846, 11157778, 11217851, 11358480, 11412024, 11566859, 12117807, 12183364, 12193642, 12397630, 12441290, 12447396, 12466851, 12477932, 12571103, 12581525, 15030763, 15069081, 15465489, 15617687, 15618518, 15782199, 16141072, 16141073, 16672333, 16847320, 1691…	GO:0001654: eye development, GO:0006355: regulation of transcription, DNA-dependent, GO:0045449: regulation of transcription, GO:0005634: nucleus, GO:0003677: DNA binding, GO:0003700: transcription factor activity, GO:0043565: sequence-specific DNA binding		gb:U68384.1 /DB_XREF=gi:1679671 /GEN=Mrg1b /FEA=FLmRNA /CNT=105 /TID=Mm.31436.1 /TIER=FL+Stack /STK=55 /UG=Mm.31436 /LL=17536 /DEF=Mus musculus Meis1-related protein 1b (Mrg1b) mRNA, complete cds. /PROD=Meis1-related protein 1b /FL=gb:NM_010825.1 gb:BC017375.1 gb:U68384.1
1418945_at	control	9.4653	5.4523	PPP-PPA	882.73	118.941	161.9	57.0269	856.2	1012.7	779.3	192.6	197	96.1	Mmp3	matrix metallopeptidase 3	9	9 A1	7445821	NM_010809	17392	1398148, 7669731, 7760812, 7960227, 8144618, 8175886, 8573787, 8672141, 8674412, 8872958, 9006971, 9030563, 9108368, 9291579, 9348221, 9398846, 9433876, 9490689, 9708806, 10048576, 10349636, 10359808, 10419448, 10428026, 10433819, 10450741, 10531025, 10553093, 10657574, 10713697, 10731089, 10949577, 10985432, 11042159, 11076861, 11113146, 11217851, 11350822, 11566859, 11830584, 11869290, 12060661…	GO:0000270: peptidoglycan metabolic process, GO:0006508: proteolysis, GO:0030574: collagen catabolic process, GO:0005578: extracellular matrix (sensu Metazoa), GO:0005615: extracellular space, GO:0004222: metalloendopeptidase activity, GO:0004248: stromelysin 1 activity, GO:0005509: calcium ion binding, GO:0008233: peptidase activity, GO:0008237: metallopeptidase activity, GO:0008270: zinc ion bi…		gb:NM_010809.1 /DB_XREF=gi:6754713 /GEN=Mmp3 /FEA=FLmRNA /CNT=27 /TID=Mm.4993.1 /TIER=FL+Stack /STK=16 /UG=Mm.4993 /LL=17392 /DEF=Mus musculus matrix metalloproteinase 3 (Mmp3), mRNA. /PROD=matrix metalloproteinase 3 /FL=gb:BC006725.1 gb:NM_010809.1
1435701_at	control	9.4621	8.8423	PPP-PPP	2907.63	440.601	328.83	169.425	2399.5	3139.8	3183.6	501.1	323	162.4	Dnajb6	DnaJ (Hsp40) homolog, subfamily B, member 6	5	5 B1	30066781, 30066805, 30066726	BM118858	23950	8889548, 9187083, 10021343, 10349636, 10725249, 10922068, 11042159, 11076861, 11147971, 11217851, 12466851, 12477932, 12565881, 15782199, 16141072, 16141073, 16260608	GO:0006457: protein folding, GO:0045892: negative regulation of transcription, DNA-dependent, GO:0005634: nucleus, GO:0005737: cytoplasm, GO:0003677: DNA binding, GO:0005515: protein binding, GO:0016564: transcriptional repressor activity, GO:0031072: heat shock protein binding		gb:BM118858 /DB_XREF=gi:17086884 /DB_XREF=L0917B06-3 /CLONE=L0917B06 /FEA=EST /CNT=20 /TID=Mm.170971.1 /TIER=Stack /STK=14 /UG=Mm.170971 /UG_TITLE=ESTs
1443056_at	control	9.4535	3.2903	PPP-PPA	383.1	10.5532	116.43	47.7045	384.8	371.8	392.7	139.3	148.4	61.6	Ptprd	protein tyrosine phosphatase, receptor type, D	4	4 C3	-75412469	BB374993	19266	7595475, 7733931, 7832766, 7988677, 8267598, 8355697, 8875997, 8889548, 8989520, 9566880, 9784606, 10101124, 10349636, 10856223, 11042159, 11076861, 11217851, 11978849, 12205107, 12466851, 12477932, 15172686, 15684034, 16141072, 16141073, 16373427, 16738228	GO:0006470: protein amino acid dephosphorylation, GO:0006470: protein amino acid dephosphorylation, GO:0006796: phosphate metabolic process, GO:0007155: cell adhesion, GO:0007185: transmembrane receptor protein tyrosine phosphatase signaling pathway, GO:0007185: transmembrane receptor protein tyrosine phosphatase signaling pathway, GO:0005886: plasma membrane, GO:0005887: integral to plasma membr…		gb:BB374993 /DB_XREF=gi:16407344 /DB_XREF=BB374993 /CLONE=C130078A05 /FEA=EST /CNT=3 /TID=Mm.167541.1 /TIER=ConsEnd /STK=3 /UG=Mm.167541 /UG_TITLE=ESTs
1418651_at	control	9.4305	1.8603	PPP-PPP	649.43	21.3132	349.1	50.8766	627.7	650.3	670.3	382	374.8	290.5	Spata6	spermatogenesis associated 6	4	4 D1	111217941	AK005819	67946	10349636, 11042159, 11076861, 11125038, 11217851, 12466851, 12477932, 12652657, 12771232, 15782199, 16141072, 16141073	GO:0008150: biological_process, GO:0005575: cellular_component		gb:AK005819.1 /DB_XREF=gi:12838590 /FEA=FLmRNA /CNT=98 /TID=Mm.8540.1 /TIER=Stack /STK=38 /UG=Mm.8540 /LL=67946 /UG_GENE=1700062C23Rik /UG_TITLE=RIKEN cDNA 1700062C23 gene /DEF=Mus musculus adult male testis cDNA, RIKEN full-length enriched library, clone:1700010E23:homolog to MRNA, TESTIS SPECIFIC EXPRESSING GENE, COMPLETE CDS, full insert sequence. /FL=gb:AF291465.1 gb:NM_026470.2
1433648_at	control	9.427	1.9552	PPP-PPP	7049.5	521.584	3605.53	358.253	6493	7527.2	7128.3	3708.4	3901.1	3207.1	Spag9	sperm associated antigen 9	11	11 C	93860294, 93812180	BM938614	70834	8889548, 10349636, 10922068, 11042159, 11076861, 11106729, 11217851, 12391307, 12466851, 12477932, 12897243, 15368895, 15767678, 15987681, 16141072, 16141073, 17074887	GO:0000187: activation of MAPK activity, GO:0051260: protein homooligomerization, GO:0005737: cytoplasm, GO:0008432: JUN kinase binding, GO:0019894: kinesin binding		gb:BM938614 /DB_XREF=gi:19397766 /DB_XREF=UI-M-CG0p-bex-h-12-0-UI.r1 /CLONE=UI-M-CG0p-bex-h-12-0-UI /FEA=EST /CNT=163 /TID=Mm.27302.1 /TIER=Stack /STK=77 /UG=Mm.27302 /LL=104664 /UG_GENE=AW552012 /UG_TITLE=expressed sequence AW552012
1419504_at	control	9.4241	31.764	PPP-AAA	663.87	117.389	20.9	13.5746	682.7	770.7	538.2	31.5	25.6	5.6	Mogat1	monoacylglycerol O-acyltransferase 1	1	1 C4	78395037	NM_026713	68393	8889548, 10349636, 11042159, 11076861, 11217851, 11481335, 12077311, 12466851, 12477932, 16141072, 16141073	GO:0006071: glycerol metabolic process, GO:0006629: lipid metabolic process, GO:0006651: diacylglycerol biosynthetic process, GO:0008610: lipid biosynthetic process, GO:0045454: cell redox homeostasis, GO:0005624: membrane fraction, GO:0005783: endoplasmic reticulum, GO:0016020: membrane, GO:0016021: integral to membrane, GO:0003846: 2-acylglycerol O-acyltransferase activity, GO:0004144: diacylgl…		gb:NM_026713.1 /DB_XREF=gi:18426804 /GEN=Dgat2l1 /FEA=FLmRNA /CNT=26 /TID=Mm.41325.1 /TIER=FL+Stack /STK=9 /UG=Mm.41325 /LL=68393 /DEF=Mus musculus diacylglycerol O-acyltransferase 2-like 1 (Dgat2l1), mRNA. /PROD=diacylglycerol O-acyltransferase 2-like 1 /FL=gb:AF384162.1 gb:NM_026713.1
1460371_at	control	9.4209	17.9665	AAP-AAA	304.23	50.4085	16.93	15.7805	247.7	320.5	344.5	34.8	11.1	4.9	Hspa12b	heat shock protein 12B	2	2 F3	130818852	BC011103	72630	10349636, 11042159, 11076861, 11217851, 12466851, 12477932, 12552099, 16141072, 16141073	GO:0000166: nucleotide binding, GO:0005524: ATP binding		gb:BC011103.1 /DB_XREF=gi:15029766 /FEA=FLmRNA /CNT=24 /TID=Mm.158850.1 /TIER=FL /STK=5 /UG=Mm.158850 /LL=72630 /UG_GENE=2700081N06Rik /DEF=Mus musculus, RIKEN cDNA 2700081N06 gene, clone MGC:19270 IMAGE:3990088, mRNA, complete cds. /PROD=RIKEN cDNA 2700081N06 gene /FL=gb:BC011103.1
1452590_a_at	control	9.409	6.1235	PAP-AAA	659.3	60.9892	107.67	81.192	729.7	625.7	622.5	95.9	33	194.1	Plac9	placenta specific 9	14	14 B	-24721587, -24861357, -25000971	BB609699	211623	8889548, 10349636, 10725249, 10922068, 11042159, 11076861, 11217851, 12466851, 12477932, 12758124, 16141072, 16141073	GO:0008150: biological_process, GO:0005575: cellular_component, GO:0003674: molecular_function		gb:BB609699 /DB_XREF=gi:16451414 /DB_XREF=BB609699 /CLONE=1110053N20 /FEA=mRNA /CNT=51 /TID=Mm.29491.1 /TIER=Stack /STK=29 /UG=Mm.29491 /UG_TITLE=Mus musculus, clone IMAGE:1265114, mRNA, partial cds
1426465_at	control	9.3979	2.3158	PPP-PPP	656.83	53.2587	283.63	43.5247	694.5	680.1	595.9	274.5	245.4	331	Dlgap4	discs, large homolog-associated protein 4 (Drosophila)	2	2 H1	156305145, 156412719, 156412425	BG066219	228836	8889548, 10349636, 10744724, 10922068, 11042159, 11076861, 11217851, 12466851, 12477932, 12693553, 15024750, 15782199, 15927279, 16141072, 16141073	GO:0007267: cell-cell signaling, GO:0045202: synapse		gb:BG066219 /DB_XREF=gi:12548786 /DB_XREF=H3040D03-3 /CLONE=H3040D03 /FEA=FLmRNA /CNT=86 /TID=Mm.22094.1 /TIER=Stack /STK=13 /UG=Mm.22094 /UG_TITLE=Mus musculus, clone MGC:37636 IMAGE:5002845, mRNA, complete cds /FL=gb:BC024558.1
1455961_at	control	9.3907	23.0636	PPP-PPP	4253.7	739.848	184.43	126.285	3440.9	4887.9	4432.3	209.2	296.5	47.6						AV174022					gb:AV174022 /DB_XREF=gi:15404698 /DB_XREF=AV174022 /CLONE=5730407O20 /FEA=EST /CNT=32 /TID=Mm.13052.2 /TIER=Stack /STK=22 /UG=Mm.13052 /LL=16483 /UG_GENE=Kap /UG_TITLE=kidney androgen regulated protein
1457206_at	control	9.378	2.5896	PPP-PPA	135.87	9.8053	52.47	11.8795	127.6	146.7	133.3	64.8	51.5	41.1	Zfp521	zinc finger protein 521	18	18 A1	-13831384	BB439768	225207	8107195, 8268679, 8563752, 8662222, 8706013, 8889548, 10349636, 11042159, 11076861, 11217851, 12393497, 12466851, 12477932, 15449545, 15580294, 15618518, 16141072, 16141073	GO:0005622: intracellular, GO:0005634: nucleus, GO:0003676: nucleic acid binding, GO:0008270: zinc ion binding, GO:0046872: metal ion binding		gb:BB439768 /DB_XREF=gi:16424596 /DB_XREF=BB439768 /CLONE=D030018P15 /FEA=EST /CNT=5 /TID=Mm.121685.1 /TIER=ConsEnd /STK=5 /UG=Mm.121685 /UG_TITLE=ESTs
1439420_x_at	control	9.3762	3.3218	PPP-PPP	1141.7	142.715	343.7	36.9176	1100.8	1023.9	1300.4	340.3	308.6	382.2	Ggtla1	gamma-glutamyltransferase-like activity 1	10	10 C1	75033096	BB208329	23887	9774450, 10349636, 10667344, 11042159, 11076861, 11217851, 11463821, 12163373, 12466851, 12477932, 16141072, 16141073	GO:0006750: glutathione biosynthetic process, GO:0006954: inflammatory response, GO:0019370: leukotriene biosynthetic process, GO:0005886: plasma membrane, GO:0016020: membrane, GO:0016021: integral to membrane, GO:0003840: gamma-glutamyltransferase activity, GO:0003840: gamma-glutamyltransferase activity, GO:0008415: acyltransferase activity, GO:0016740: transferase activity	00430: Taurine and hypotaurine metabolism, 00450: Selenoamino acid metabolism, 00460: Cyanoamino acid metabolism, 00480: Glutathione metabolism, 00590: Arachidonic acid metabolism	gb:BB208329 /DB_XREF=gi:8873282 /DB_XREF=BB208329 /CLONE=A430087L14 /FEA=EST /CNT=8 /TID=Mm.130623.1 /TIER=Stack /STK=8 /UG=Mm.130623 /UG_TITLE=ESTs
1443870_at	control	9.3682	4.93	PPP-AAA	603.77	56.7297	122.47	68.5584	542.8	613.5	655	192.6	119.2	55.6	Abcc4	ATP-binding cassette, sub-family C (CFTR/MRP), member 4	14	14 E4	-117366401	BB291885	239273	10349636, 11042159, 11076861, 11217851, 12466851, 12499391, 12883481, 15004017, 15314169, 15782199, 15802388, 15886284, 16141072, 16141073, 16782087, 16844773, 16988054, 17210706	GO:0006811: ion transport, GO:0006855: multidrug transport, GO:0005624: membrane fraction, GO:0005886: plasma membrane, GO:0016020: membrane, GO:0016021: integral to membrane, GO:0031088: platelet dense granule membrane, GO:0000166: nucleotide binding, GO:0005254: chloride channel activity, GO:0005524: ATP binding, GO:0015559: multidrug efflux pump activity, GO:0016887: ATPase activity, GO:004262…		gb:BB291885 /DB_XREF=gi:16401515 /DB_XREF=BB291885 /CLONE=B130008G09 /FEA=EST /CNT=21 /TID=Mm.86700.1 /TIER=ConsEnd /STK=2 /UG=Mm.86700 /UG_TITLE=ESTs, Weakly similar to A40303 cystic fibrosis transmembrane conductance regulator - mouse (M.musculus)
1423380_s_at	control	9.3583	2.2707	PPP-PMP	425	15.9603	187.17	41.0231	435.1	406.6	433.3	220.9	199.1	141.5	Nfatc4	nuclear factor of activated T-cells, cytoplasmic, calcineurin-dependent 4	14		54779078	BF227641	73181	10349636, 10922068, 11042159, 11076861, 11217851, 11344309, 11439183, 11997522, 12370307, 12466851, 12477932, 12750314, 12787506, 12796475, 15339668, 15618518, 15684385, 15998744, 16141072, 16141073, 16141075, 16273547, 16475165, 16489119, 16554754, 16644691, 16718377, 16803872, 16908540	GO:0006355: regulation of transcription, DNA-dependent, GO:0007507: heart development, GO:0008152: metabolic process, GO:0045333: cellular respiration, GO:0005634: nucleus, GO:0003677: DNA binding, GO:0003700: transcription factor activity, GO:0003824: catalytic activity	04010: MAPK signaling pathway, 04310: Wnt signaling pathway, 04360: Axon guidance, 04370: VEGF signaling pathway, 04650: Natural killer cell mediated cytotoxicity, 04660: T cell receptor signaling pathway, 04662: B cell receptor signaling pathway	gb:BF227641 /DB_XREF=gi:11135635 /DB_XREF=uz31g08.x1 /CLONE=IMAGE:3670718 /FEA=FLmRNA /CNT=24 /TID=Mm.27908.1 /TIER=Stack /STK=10 /UG=Mm.27908 /LL=73181 /UG_GENE=Nfatc4 /UG_TITLE=nuclear factor of activated T-cells, cytoplasmic, calcineurin-dependent 4 /FL=gb:NM_023699.1 gb:AF283284.1
1438530_at	control	9.338	4.3449	PPP-PPP	508.07	61.9017	116.93	37.8357	552.7	534.1	437.4	133.1	144	73.7	Tfpi	tissue factor pathway inhibitor	2	2 D	-84233698	BB756069	21788	9242522, 9493581, 9819035, 9858573, 9974373, 10021455, 10349636, 10922068, 11042159, 11076861, 11154109, 11217851, 11425765, 12083498, 12466851, 12477932, 14660441, 14743444, 15582152, 15598816, 15604416, 16141072, 16141073	GO:0007596: blood coagulation, GO:0005576: extracellular region, GO:0005615: extracellular space, GO:0004866: endopeptidase inhibitor activity, GO:0004867: serine-type endopeptidase inhibitor activity, GO:0030414: protease inhibitor activity	04610: Complement and coagulation cascades	gb:BB756069 /DB_XREF=gi:16202550 /DB_XREF=BB756069 /CLONE=G270070I12 /FEA=EST /CNT=11 /TID=Mm.32938.1 /TIER=Stack /STK=10 /UG=Mm.32938 /UG_TITLE=ESTs
1456765_at	control	9.3327	3.2977	PPP-PAA	726.7	59.0888	220.37	73.0679	718.4	672.2	789.5	255.2	136.4	269.5	6430511F03	hypothetical protein 6430511F03	X	X C3		AV339861	331475	10349636, 11042159, 11076861, 11217851, 12466851, 16141072, 16141073			gb:AV339861 /DB_XREF=gi:16396798 /DB_XREF=AV339861 /CLONE=6430511F03 /FEA=EST /CNT=12 /TID=Mm.19738.1 /TIER=ConsEnd /STK=7 /UG=Mm.19738 /UG_TITLE=ESTs
1416564_at	control	9.3233	4.5243	PPP-PPP	906.67	33.0372	200.4	126.98	884.2	891.2	944.6	323.3	208.2	69.7	Sox7	SRY-box containing gene 7	14	14 C3	62897815	NM_011446	20680	1614875, 8441686, 8921394, 10320775, 10349636, 11042159, 11076861, 11217851, 11691915, 11973269, 12466851, 12815626, 15082719, 15220343, 15355796, 15542856, 15618518, 16141072, 16141073, 16306355, 16895970	GO:0006350: transcription, GO:0006355: regulation of transcription, DNA-dependent, GO:0006357: regulation of transcription from RNA polymerase II promoter, GO:0005634: nucleus, GO:0005667: transcription factor complex, GO:0003677: DNA binding, GO:0003700: transcription factor activity		gb:NM_011446.1 /DB_XREF=gi:6755611 /GEN=Sox7 /FEA=FLmRNA /CNT=83 /TID=Mm.42162.1 /TIER=FL+Stack /STK=82 /UG=Mm.42162 /LL=20680 /DEF=Mus musculus SRY-box containing gene 7 (Sox7), mRNA. /PROD=SRY-box containing gene 7 /FL=gb:AB023419.1 gb:NM_011446.1
1454858_x_at	control	9.315	22.4746	PPP-PPP	3032.57	537.86	134.93	31.6611	3102.9	2463	3531.8	102.8	166.1	135.9	Mettl7a	methyltransferase like 7A	15	15 F3	100132850	AV171622	70152	10349636, 11042159, 11076861, 11217851, 12466851, 12477932, 16141072, 16141073	GO:0008168: methyltransferase activity, GO:0016740: transferase activity		gb:AV171622 /DB_XREF=gi:16383588 /DB_XREF=AV171622 /CLONE=3300001H21 /FEA=EST /CNT=117 /TID=Mm.220975.2 /TIER=Stack /STK=40 /UG=Mm.220975 /LL=70152 /UG_GENE=2210414H16Rik /UG_TITLE=RIKEN cDNA 2210414H16 gene
1428848_a_at	control	9.306	2.728	PPP-PPP	784.2	54.6739	287.47	74.554	810	721.4	821.2	365.6	279.7	217.1	Macf1	microtubule-actin crosslinking factor 1	4	4 D2.2		BM248206	11426	8889548, 8954775, 9878243, 10349636, 10601340, 10653359, 10721728, 10747097, 10922068, 11002341, 11042159, 11076861, 11217851, 11544199, 12399109, 12466851, 12477932, 12693553, 14636561, 15028287, 15582152, 16076900, 16141072, 16141073, 16815997	GO:0001707: mesoderm formation, GO:0005975: carbohydrate metabolic process, GO:0006620: posttranslational protein targeting to membrane, GO:0006928: cell motility, GO:0007050: cell cycle arrest, GO:0007163: establishment and/or maintenance of cell polarity, GO:0016055: Wnt receptor signaling pathway, GO:0016055: Wnt receptor signaling pathway, GO:0005856: cytoskeleton, GO:0015629: actin cytoskele…		gb:BM248206 /DB_XREF=gi:17883476 /DB_XREF=K0813B10-3 /CLONE=K0813B10 /FEA=mRNA /CNT=72 /TID=Mm.3350.2 /TIER=Stack /STK=10 /UG=Mm.3350 /LL=11426 /UG_GENE=Aclp7 /UG_TITLE=actin-crosslinking protein 7
1440325_at	control	9.3045	2.1047	PPP-PPP	207.8	15.9502	98.73	12.562	223.7	191.8	207.9	107.2	104.7	84.3						AV332226					gb:AV332226 /DB_XREF=gi:16396209 /DB_XREF=AV332226 /CLONE=6330531L09 /FEA=EST /CNT=7 /TID=Mm.32301.1 /TIER=ConsEnd /STK=5 /UG=Mm.32301 /UG_TITLE=ESTs
1436739_at	control	9.3042	5.2931	PPP-PPM	1250.77	166.683	236.3	88.7779	1314.1	1061.7	1376.5	338.4	193.2	177.3	Agtr1a	angiotensin II receptor, type 1a	13	13 A3.2	30343921	AI551199	11607	1497638, 1599461, 7642517, 7724593, 7731139, 8074205, 8878439, 9096120, 9140053, 9177228, 9245700, 9310306, 9316207, 9321480, 9389538, 9458822, 9466969, 9562437, 9576131, 9609089, 9727021, 9788961, 9808437, 9843909, 9860997, 9931152, 9933249, 9973259, 10076178, 10205143, 10222259, 10231430, 10330427, 10349636, 10358057, 10373225, 10405217, 10432390, 10562257, 10562266, 10571794, 10589702, 1058970…	GO:0001568: blood vessel development, GO:0001822: kidney development, GO:0001822: kidney development, GO:0001991: regulation of blood pressure by circulatory renin-angiotensin, GO:0002001: renin secretion into blood stream, GO:0002018: renin-angiotensin regulation of aldosterone production, GO:0002019: angiotensin mediated regulation of renal output, GO:0002035: brain renin-angiotensin system, GO…	04020: Calcium signaling pathway, 04080: Neuroactive ligand-receptor interaction	gb:AI551199 /DB_XREF=gi:4483562 /DB_XREF=vo61f08.x1 /CLONE=IMAGE:1054407 /FEA=EST /CNT=81 /TID=Mm.35062.1 /TIER=Stack /STK=77 /UG=Mm.35062 /LL=105197 /UG_GENE=AI551199 /UG_TITLE=expressed sequence AI551199
1456763_at	control	9.2852	2.1392	PPP-PPP	814.47	31.1667	380.73	74.6647	780.1	840.9	822.4	462.7	316.6	362.9	AA536749	expressed sequence AA536749	11	11 B1.3	59478824, 59478726	BB365879	26936	8889548, 9199174, 10349636, 10384052, 10725249, 10922068, 11042159, 11076861, 11217851, 12465718, 12466851, 12477932, 12732640, 16141072, 16141073, 16243315	GO:0005856: cytoskeleton, GO:0003779: actin binding		gb:BB365879 /DB_XREF=gi:16406383 /DB_XREF=BB365879 /CLONE=C130031E21 /FEA=EST /CNT=17 /TID=Mm.30503.1 /TIER=ConsEnd /STK=7 /UG=Mm.30503 /LL=103810 /UG_GENE=AI647711 /UG_TITLE=expressed sequence AI647711
1437950_at	control	9.2703	4.0172	PPP-PAA	155.6	21.8259	38.73	0.6351	178.4	134.9	153.5	38	39.1	39.1	BC035537	cDNA sequence BC035537	8	8 B1.1	-46837898	BB818275	212326	10349636, 11042159, 11076861, 11217851, 12466851, 12477932, 15782199, 16141072, 16141073	GO:0005529: sugar binding		gb:BB818275 /DB_XREF=gi:16990904 /DB_XREF=BB818275 /CLONE=G730044G17 /FEA=EST /CNT=18 /TID=Mm.213405.1 /TIER=Stack /STK=13 /UG=Mm.213405 /UG_TITLE=ESTs
1437273_at	control	9.2701	3.1507	PPP-AAA	167.3	12.1211	53.1	17.5605	177.5	170.5	153.9	38.8	72.7	47.8	Htra4	HtrA serine peptidase 4	8	8 A2	-26490472	AV315397	330723	10349636, 11042159, 11076861, 11217851, 12466851, 12477932, 16141072, 16141073			gb:AV315397 /DB_XREF=gi:16394494 /DB_XREF=AV315397 /CLONE=5830430C08 /FEA=EST /CNT=21 /TID=Mm.25572.1 /TIER=Stack /STK=21 /UG=Mm.25572 /UG_TITLE=ESTs
1433311_at	control	9.2635	6.0389	PPP-AAA	284.43	43.7705	47.1	7.3021	300.5	234.9	317.9	39.9	54.5	46.9	D530031A16Rik	RIKEN cDNA D530031A16 gene	16			AK021303	78724	10349636, 11042159, 11076861, 11217851, 12466851, 16141072, 16141073			gb:AK021303.1 /DB_XREF=gi:12862153 /FEA=mRNA /CNT=1 /TID=Mm.160118.1 /TIER=ConsEnd /STK=0 /UG=Mm.160118 /LL=78724 /UG_GENE=D530031A16Rik /UG_TITLE=RIKEN cDNA D530031A16 gene /DEF=Mus musculus 13 days embryo stomach cDNA, RIKEN full-length enriched library, clone:D530031A16:unclassifiable transcript, full insert sequence.
1438910_a_at	control	9.2604	3.3702	PPP-PPP	1364.13	178.811	404.77	14.9874	1247.5	1570	1274.9	421.8	398.9	393.6	Stom	stomatin	2	2 B-C1	-35135999	BB782444	13830	7540886, 7774911, 8075499, 8088777, 8786142, 8921901, 10090952, 10349636, 10383825, 11042159, 11076861, 11217851, 11287341, 12466851, 12477932, 15471860, 15475267, 16141072, 16141073, 17082620	GO:0051260: protein homooligomerization, GO:0005856: cytoskeleton, GO:0005887: integral to plasma membrane, GO:0016020: membrane, GO:0016021: integral to membrane, GO:0045121: lipid raft		gb:BB782444 /DB_XREF=gi:16943144 /DB_XREF=BB782444 /CLONE=G430080L16 /FEA=EST /CNT=9 /TID=Mm.4441.5 /TIER=Stack /STK=9 /UG=Mm.4441 /LL=13830 /UG_GENE=Epb7.2 /UG_TITLE=erythrocyte protein band 7.2
1430164_a_at	control	9.2592	2.2631	PPP-PPP	191.83	14.6936	84.77	13.6097	205.2	194.2	176.1	88.1	69.8	96.4	Grb10	growth factor receptor bound protein 10	11	11 A1	-11830510	AK012646	14783	7731717, 8798417, 8798570, 8889548, 9062339, 9070953, 9448292, 9815134, 10349636, 10446181, 10922068, 11042159, 11076861, 11180952, 11217851, 11668390, 12466851, 12477932, 12533789, 12595547, 12627233, 12693553, 12697834, 12700169, 12771153, 12783867, 12829789, 15031102, 15226823, 15601824, 15604097, 15664450, 15722337, 15752742, 16037382, 16141072, 16141073, 16403808, 16416089, 16987518, 17101788	GO:0007165: signal transduction, GO:0007242: intracellular signaling cascade, GO:0048009: insulin-like growth factor receptor signaling pathway, GO:0005829: cytosol, GO:0004872: receptor activity, GO:0005070: SH3/SH2 adaptor activity, GO:0005515: protein binding		gb:AK012646.1 /DB_XREF=gi:12849527 /GEN=Grb10 /FEA=mRNA /CNT=9 /TID=Mm.24640.4 /TIER=ConsEnd /STK=3 /UG=Mm.24640 /LL=14783 /UG_TITLE=growth factor receptor bound protein 10 /DEF=Mus musculus 10, 11 days embryo whole body cDNA, RIKEN full-length enriched library, clone:2810002M10:growth factor receptor bound protein 10, full insert sequence.
1442581_at	control	9.2586	2.7035	PPP-AAA	247.37	11.4631	91.5	26.811	260.6	241	240.5	108.6	60.6	105.3	Ksr1	kinase suppressor of ras 1	11	11 B5	-78830995	BB522422	16706	7626882, 8521512, 8889548, 9115393, 9427625, 9427629, 10349636, 10891492, 11042159, 11076861, 11217851, 11751383, 11940661, 12105213, 12133899, 12410604, 12466851, 12588996, 12874031, 14724641, 15084597, 15121859, 15240686, 15371409, 15520859, 16107706, 16141072, 16141073, 16507997, 16731514	GO:0006468: protein amino acid phosphorylation, GO:0007242: intracellular signaling cascade, GO:0007242: intracellular signaling cascade, GO:0016020: membrane, GO:0004672: protein kinase activity, GO:0004674: protein serine/threonine kinase activity, GO:0004713: protein-tyrosine kinase activity, GO:0004713: protein-tyrosine kinase activity, GO:0005524: ATP binding, GO:0008270: zinc ion binding, G…		gb:BB522422 /DB_XREF=gi:16443662 /DB_XREF=BB522422 /CLONE=D930007K17 /FEA=EST /CNT=4 /TID=Mm.187729.1 /TIER=ConsEnd /STK=3 /UG=Mm.187729 /UG_TITLE=ESTs
1420878_a_at	control	9.2483	2.3922	PPP-PPP	2887.9	241.558	1207.23	201.801	3112.7	2632.5	2918.5	1079.8	1102	1439.9	Ywhab	tyrosine 3-monooxygenase/tryptophan 5-monooxygenase activation protein, beta polypeptide	2	2 H3	163686637	NM_018753	54401	8889548, 10349636, 10922068, 11042159, 11076861, 11217851, 11875115, 12008017, 12446771, 12466851, 12477932, 12524439, 12618428, 12896901, 12937170, 14679215, 15226823, 15240115, 15782199, 15883195, 16141072, 16141073, 16613846	GO:0006605: protein targeting, GO:0005575: cellular_component, GO:0005737: cytoplasm, GO:0048471: perinuclear region, GO:0005515: protein binding, GO:0019904: protein domain specific binding	04110: Cell cycle	gb:NM_018753.1 /DB_XREF=gi:9055383 /GEN=Ywhab /FEA=FLmRNA /CNT=239 /TID=Mm.34319.1 /TIER=FL /STK=2 /UG=Mm.34319 /LL=54401 /DEF=Mus musculus tyrosine 3-monooxygenasetryptophan 5-monooxygenase activation protein, beta polypeptide (Ywhab), mRNA. /PROD=tyrosine 3-monooxgenasetryptophan5-monooxgenase activation protein, beta polypeptide /FL=gb:NM_018753.1 gb:AF058797.1
1449158_at	control	9.2472	4.7278	PPP-PPP	665.2	79.2176	140.7	58.1041	592.3	749.5	653.8	198.4	141.5	82.2	Kcnk2	potassium channel, subfamily K, member 2	1	1 H6	-190908724	NM_010607	16526	8889548, 9003761, 9506712, 10349636, 10784345, 11042159, 11076861, 11167025, 11217851, 11559713, 11560940, 12065410, 12466851, 12477932, 15175651, 15261098, 15572365, 15577940, 15976821, 16006563, 16141072, 16141073, 16636285, 16675954, 16750514, 16906152, 17110924	GO:0006810: transport, GO:0006811: ion transport, GO:0006813: potassium ion transport, GO:0006813: potassium ion transport, GO:0007186: G-protein coupled receptor protein signaling pathway, GO:0030322: stabilization of membrane potential, GO:0005887: integral to plasma membrane, GO:0008076: voltage-gated potassium channel complex, GO:0016020: membrane, GO:0016021: integral to membrane, GO:0005216…		gb:NM_010607.1 /DB_XREF=gi:6754431 /GEN=Kcnk2 /FEA=FLmRNA /CNT=30 /TID=Mm.31570.1 /TIER=FL+Stack /STK=21 /UG=Mm.31570 /LL=16526 /DEF=Mus musculus potassium channel, subfamily K, member 2 (Kcnk2), mRNA. /PROD=potassium channel, subfamily K, member 2 /FL=gb:U73488.2 gb:NM_010607.1
1444472_at	control	9.2461	2.8107	PPP-PPP	1685.97	170.424	599.83	111.142	1781.8	1489.2	1786.9	498.5	582.3	718.7	Btg4	B-cell translocation gene 4	9	9 A5.3	50868230	BB154631	56057	10349636, 10725249, 10922068, 10995567, 11042159, 11076861, 11217851, 11267995, 11377414, 11544199, 12466851, 12477932, 15237213, 16141072, 16141073	GO:0045930: negative regulation of progression through mitotic cell cycle, GO:0005575: cellular_component, GO:0003674: molecular_function		gb:BB154631 /DB_XREF=gi:16268194 /DB_XREF=BB154631 /CLONE=A130021L17 /FEA=EST /CNT=4 /TID=Mm.207503.1 /TIER=ConsEnd /STK=2 /UG=Mm.207503 /UG_TITLE=ESTs
1433711_s_at	control	9.2425	1.9896	PPP-PPP	1880.13	79.2447	944.97	156.311	1819.5	1969.8	1851.1	1124.9	867.3	842.7	Sesn1	sestrin 1	10	10 B2	41575863	BG076140	140742	8889548, 10349636, 10725249, 10922068, 11042159, 11076861, 11217851, 11695551, 11707774, 12466851, 12477932, 16141072, 16141073	GO:0007050: cell cycle arrest, GO:0005634: nucleus		gb:BG076140 /DB_XREF=gi:12558709 /DB_XREF=H3156B03-3 /CLONE=H3156B03 /FEA=EST /CNT=107 /TID=Mm.29742.1 /TIER=Stack /STK=68 /UG=Mm.29742 /LL=140742 /UG_GENE=Pa26-pending /UG_TITLE=p53 regulated PA26 nuclear protein
1417962_s_at	control	9.2376	11.4071	PPP-PPP	18556.4	3156.86	1626.73	332.485	15339.6	21649.7	18679.8	1380.3	1495	2004.9	Ghr	growth hormone receptor	15	15 A1	-3267759, -3277533	NM_010284	14600	1354638, 1404614, 1639029, 1794046, 2739661, 2776481, 2825030, 3200842, 7529079, 7588264, 7664676, 7706460, 7721793, 7733275, 7789316, 7835269, 7894338, 7910583, 7959737, 7988474, 8014591, 8016161, 8276403, 8288233, 8365377, 8661743, 8812413, 8827514, 8884266, 8921876, 8973143, 9005979, 9112397, 9144201, 9196007, 9371826, 9521872, 9657863, 9756919, 10067829, 10342852, 10349636, 10425445, 10448090…	GO:0006897: endocytosis, GO:0016020: membrane, GO:0016021: integral to membrane, GO:0019898: extrinsic to membrane, GO:0004872: receptor activity, GO:0004896: hematopoietin/interferon-class (D200-domain) cytokine receptor activity, GO:0005515: protein binding	04060: Cytokine-cytokine receptor interaction, 04080: Neuroactive ligand-receptor interaction, 04630: Jak-STAT signaling pathway	gb:NM_010284.1 /DB_XREF=gi:6857794 /GEN=Ghr /FEA=FLmRNA /CNT=99 /TID=Mm.3986.1 /TIER=FL+Stack /STK=32 /UG=Mm.3986 /LL=14600 /DEF=Mus musculus growth hormone receptor (Ghr), mRNA. /PROD=growth hormone receptor /FL=gb:NM_010284.1
1447602_x_at	control	9.2275	5.6077	PPP-PPP	5337.57	765.75	951.83	302.205	5743.8	5814.6	4454.3	1271.9	912.2	671.4	Sulf2	sulfatase 2	2	2 H3	-165764293	AU020235	72043	8889548, 10349636, 10725249, 10922068, 11042159, 11076861, 11217851, 12368295, 12466851, 12477932, 14621295, 15782199, 16141072, 16141073, 16844427, 17116694	GO:0006790: sulfur metabolic process, GO:0008152: metabolic process, GO:0030201: heparan sulfate proteoglycan metabolic process, GO:0005615: extracellular space, GO:0005783: endoplasmic reticulum, GO:0009986: cell surface, GO:0004065: arylsulfatase activity, GO:0005509: calcium ion binding, GO:0008449: N-acetylglucosamine-6-sulfatase activity, GO:0008484: sulfuric ester hydrolase activity, GO:001…		gb:AU020235 /DB_XREF=gi:3375819 /DB_XREF=AU020235 /CLONE=J0529E07 /FEA=EST /CNT=2 /TID=Mm.202858.1 /TIER=ConsEnd /STK=2 /UG=Mm.202858 /LL=99203 /UG_GENE=AU020235 /UG_TITLE=expressed sequence AU020235
1434161_at	control	9.2221	3.1574	PPP-PPP	767.67	88.4716	243.13	43.3359	709.7	869.5	723.8	260	275.5	193.9	Lin52	lin-52 homolog (C. elegans)	12	12 D1	85341255	BQ173965	217708	8889548, 10349636, 11042159, 11076861, 11217851, 12466851, 12477932, 16141072, 16141073			gb:BQ173965 /DB_XREF=gi:20349456 /DB_XREF=UI-M-DJ2-bvv-o-12-0-UI.s1 /CLONE=UI-M-DJ2-bvv-o-12-0-UI /FEA=EST /CNT=75 /TID=Mm.38924.1 /TIER=Stack /STK=40 /UG=Mm.38924 /UG_TITLE=ESTs
1433626_at	control	9.218	6.9903	PPP-PAA	697.17	110.885	99.73	17.4947	574.3	727.4	789.8	114.7	80.5	104	Plscr4	phospholipid scramblase 4	9	9 E3.3	92261148	BB826296	235527	10349636, 11042159, 11076861, 11217851, 12466851, 12477932, 15782199, 16141072, 16141073	GO:0016020: membrane, GO:0016021: integral to membrane, GO:0005509: calcium ion binding		gb:BB826296 /DB_XREF=gi:17004539 /DB_XREF=BB826296 /CLONE=G830042E16 /FEA=EST /CNT=101 /TID=Mm.55289.1 /TIER=Stack /STK=80 /UG=Mm.55289 /LL=102730 /UG_GENE=AV245873 /UG_TITLE=expressed sequence AV245873
1426340_at	control	9.2078	13.1649	PPP-PPP	1596.47	270.368	121.27	62.4951	1471.6	1411.1	1906.7	167.2	146.5	50.1	Slc1a3	solute carrier family 1 (glial high affinity glutamate transporter), member 3	15	15 A2	-8581340	BB357585	20512	7723632, 7903437, 8001975, 8226929, 8601800, 8661010, 8733726, 8889548, 9129177, 9180080, 9364068, 9371744, 9379843, 9539795, 9600674, 9671661, 9753165, 10349636, 10529447, 11042159, 11076861, 11102482, 11133151, 11217851, 11316002, 11325559, 11544199, 11567059, 11574907, 11852232, 12180997, 12202863, 12225864, 12466851, 12477932, 12508235, 12533615, 12546822, 12654290, 12842915, 12878755, 129574…	GO:0006605: protein targeting, GO:0006810: transport, GO:0006810: transport, GO:0006835: dicarboxylic acid transport, GO:0005887: integral to plasma membrane, GO:0005887: integral to plasma membrane, GO:0016020: membrane, GO:0016021: integral to membrane, GO:0042995: cell projection, GO:0043025: cell soma, GO:0005343: organic acid:sodium symporter activity, GO:0005386: carrier activity, GO:000538…		gb:BB365275 /DB_XREF=gi:16406326 /DB_XREF=BB365275 /CLONE=C130026O19 /FEA=FLmRNA /CNT=474 /TID=Mm.33356.1 /TIER=Stack /STK=204 /UG=Mm.33356 /UG_TITLE=Mus musculus glutamate transporter mRNA, complete cds /FL=gb:AF330257.1
1422780_at	control	9.2048	1.8902	PPP-PPP	1324.27	41.4239	700.6	109.8	1289.5	1313.2	1370.1	618	658.6	825.2	Pxmp4	peroxisomal membrane protein 4	2	2 H2	-154278484	NM_021534	59038	10349636, 11042159, 11076861, 11217851, 12466851, 12477932, 16141072, 16141073	GO:0008150: biological_process, GO:0005575: cellular_component, GO:0005777: peroxisome, GO:0016020: membrane, GO:0016021: integral to membrane, GO:0003674: molecular_function		gb:NM_021534.1 /DB_XREF=gi:10946965 /GEN=Pxmp4 /FEA=FLmRNA /CNT=69 /TID=Mm.24673.1 /TIER=FL+Stack /STK=12 /UG=Mm.24673 /LL=59038 /DEF=Mus musculus peroxisomal membrane protein 4 (Pxmp4), mRNA. /PROD=Pxmp4 /FL=gb:BC025796.1 gb:NM_021534.1
1456812_at	control	9.1992	175.326	PPP-AAA	1110.4	207.83	6.33	4.3662	1214.4	1245.7	871.1	3.1	11.3	4.6	Abcd2	ATP-binding cassette, sub-family D (ALD), member 2	15	15 E-F	-90973638	AW456685	26874	8577752, 8889548, 9195160, 9345902, 9887385, 10329405, 10349636, 10504404, 10551832, 11042159, 11076861, 11087670, 11217851, 11422379, 12466851, 12477932, 14713219, 15489218, 16141072, 16141073, 16223892, 16249184	GO:0006810: transport, GO:0005777: peroxisome, GO:0016020: membrane, GO:0016021: integral to membrane, GO:0000166: nucleotide binding, GO:0005515: protein binding, GO:0005524: ATP binding, GO:0016887: ATPase activity, GO:0017111: nucleoside-triphosphatase activity, GO:0042626: ATPase activity, coupled to transmembrane movement of substances	02010: ABC transporters - General	gb:AW456685 /DB_XREF=gi:7026902 /DB_XREF=UI-M-BH3-aqv-a-11-0-UI.s1 /CLONE=UI-M-BH3-aqv-a-11-0-UI /FEA=EST /CNT=8 /TID=Mm.40168.1 /TIER=ConsEnd /STK=7 /UG=Mm.40168 /UG_TITLE=ESTs
1424692_at	control	9.1953	2.2079	PPP-PPP	847.03	60.8788	383.63	62.5524	830.4	914.5	796.2	446.5	321.4	383	2810055F11Rik	RIKEN cDNA 2810055F11 gene	12	12 C3	-72992011	BC004753	67217	10349636, 11042159, 11076861, 11217851, 12466851, 12477932, 16141072, 16141073			gb:BC004753.1 /DB_XREF=gi:13435794 /FEA=FLmRNA /CNT=45 /TID=Mm.78025.1 /TIER=FL+Stack /STK=19 /UG=Mm.78025 /LL=67217 /UG_GENE=2810055F11Rik /DEF=Mus musculus, Similar to RIKEN cDNA 2810055F11 gene, clone MGC:7947 IMAGE:3584353, mRNA, complete cds. /PROD=Similar to RIKEN cDNA 2810055F11 gene /FL=gb:BC004753.1
1427413_a_at	control	9.1867	2.006	PPP-PPP	2648.13	172.415	1320.1	181.568	2637.1	2825.8	2481.5	1521.4	1168.7	1270.2	Cugbp1	CUG triplet repeat, RNA binding protein 1	2	2 E1	90741296	AK014492	13046	7671812, 8549854, 8609710, 8889548, 9811942, 9885975, 10349636, 10893231, 10922068, 11042159, 11076861, 11158314, 11217851, 12466851, 12477932, 12533789, 12763013, 14722059, 15782199, 15788409, 15830352, 15843400, 16033648, 16141072, 16141073, 16717059, 16931514	GO:0006376: mRNA splice site selection, GO:0006397: mRNA processing, GO:0007281: germ cell development, GO:0009790: embryonic development, GO:0016246: RNA interference, GO:0005625: soluble fraction, GO:0005634: nucleus, GO:0005634: nucleus, GO:0005634: nucleus, GO:0005737: cytoplasm, GO:0030529: ribonucleoprotein complex, GO:0000166: nucleotide binding, GO:0000900: translation repressor activity,…		gb:AK014492.1 /DB_XREF=gi:12852384 /GEN=Cugbp1 /FEA=mRNA /CNT=26 /TID=Mm.7526.3 /TIER=ConsEnd /STK=1 /UG=Mm.7526 /LL=13046 /UG_TITLE=CUG triplet repeat, RNA binding protein 1 /DEF=Mus musculus 14 days embryo liver cDNA, RIKEN full-length enriched library, clone:4432412L08:CUG triplet repeat, RNA binding protein 1, full insert sequence.
1421269_at	control	9.1862	2.6052	PPP-PAA	150.67	5.288	57.83	16.6857	153.1	154.3	144.6	77.1	48.1	48.3	Ugcg	UDP-glucose ceramide glucosyltransferase	4	4 B3	59283603	AA591863	22234	8889548, 9623774, 9918791, 9925912, 10349636, 10430909, 10725249, 10885754, 10922068, 10978518, 11042159, 11076861, 11217851, 11994410, 12417405, 12466851, 12477932, 15086559, 16109770, 16141072, 16141073, 16283624	GO:0006679: glucosylceramide biosynthetic process, GO:0006688: glycosphingolipid biosynthetic process, GO:0008544: epidermis development, GO:0005615: extracellular space, GO:0005624: membrane fraction, GO:0005737: cytoplasm, GO:0005783: endoplasmic reticulum, GO:0016020: membrane, GO:0016021: integral to membrane, GO:0003674: molecular_function, GO:0008120: ceramide glucosyltransferase activity, …	00600: Sphingolipid metabolism, 01031: Glycan structures - biosynthesis 2	gb:AA591863 /DB_XREF=gi:2405526 /DB_XREF=vk91h11.s1 /CLONE=IMAGE:962085 /FEA=FLmRNA /CNT=25 /TID=Mm.12971.1 /TIER=ConsEnd /STK=0 /UG=Mm.12971 /LL=22234 /UG_GENE=Ugcg /UG_TITLE=UDP-glucose ceramide glucosyltransferase /FL=gb:NM_011673.1 gb:D89866.1
1447948_at	control	9.1856	4.7342	PPP-PPA	476.1	68.9452	100.57	16.15	528.9	501.3	398.1	99.1	117.4	85.2	A430107O13Rik	RIKEN cDNA A430107O13 gene	6	6 A3.1	21935910	AI195854	214642	10349636, 11042159, 11076861, 11217851, 12466851, 16141072, 16141073			gb:AI195854 /DB_XREF=gi:3748460 /DB_XREF=ui51e03.x1 /CLONE=IMAGE:1885948 /FEA=EST /CNT=14 /TID=Mm.26707.2 /TIER=ConsEnd /STK=1 /UG=Mm.26707 /UG_TITLE=ESTs
1448812_at	control	9.1681	1.5604	PPP-PPP	1562.9	47.805	1001.6	94.655	1600.5	1509.1	1579.1	991.5	912.4	1100.9	Hpcal1	hippocalcin-like 1	12	12 A1.2	17716305	NM_016677	53602	10349636, 11042159, 11076861, 11217851, 11423996, 12466851, 12477932, 14739275, 15226823, 16141072, 16141073	GO:0005509: calcium ion binding		gb:NM_016677.1 /DB_XREF=gi:7949054 /GEN=Hpcal1 /FEA=FLmRNA /CNT=75 /TID=Mm.20937.1 /TIER=FL+Stack /STK=38 /UG=Mm.20937 /LL=53602 /DEF=Mus musculus hippocalcin-like 1 (Hpcal1), mRNA. /PROD=hippocalcin-like 1 /FL=gb:BC001997.1 gb:AF085192.1 gb:NM_016677.1
1441096_at	control	9.1652	19.2196	PPP-AAA	1814.97	323.056	94.43	36.828	1531.5	2166.7	1746.7	97.2	129.8	56.3	Tusc5	tumor suppressor candidate 5	11	11 B5	76496067	BB373192	237858	10349636, 11042159, 11076861, 11217851, 12466851, 12477932, 16141072, 16141073	GO:0009607: response to biotic stimulus, GO:0016020: membrane, GO:0016021: integral to membrane		gb:BB373192 /DB_XREF=gi:16407151 /DB_XREF=BB373192 /CLONE=C130069F04 /FEA=EST /CNT=8 /TID=Mm.127006.1 /TIER=ConsEnd /STK=4 /UG=Mm.127006 /UG_TITLE=ESTs
1435759_at	control	9.158	3.0085	PPP-AAA	105.7	9.9534	35.13	8.8912	95.6	115.5	106	30	30	45.4	Ctps2	cytidine 5'-triphosphate synthase 2	X	X F5	158245709	BB499142	55936	8889548, 10349636, 10922068, 11042159, 11076861, 11217851, 12466851, 12477932, 15782199, 16141072, 16141073	GO:0006221: pyrimidine nucleotide biosynthetic process, GO:0006541: glutamine metabolic process, GO:0005575: cellular_component, GO:0003824: catalytic activity, GO:0003883: CTP synthase activity, GO:0016874: ligase activity	00240: Pyrimidine metabolism	gb:BB499142 /DB_XREF=gi:16442156 /DB_XREF=BB499142 /CLONE=D630018O13 /FEA=EST /CNT=23 /TID=Mm.2065.2 /TIER=Stack /STK=13 /UG=Mm.2065 /LL=55936 /UG_GENE=Ctps2 /UG_TITLE=cytidine 5-triphosphate synthase 2
1456060_at	control	9.1515	9.9402	PPP-PPP	4600.63	739.152	462.83	258.769	5251.4	4753.5	3797	631.5	592.1	164.9	Maf	avian musculoaponeurotic fibrosarcoma (v-maf) AS42 oncogene homolog	8	8 E1	-118589229	AV284857	17132	7789972, 7799931, 8164679, 8211130, 8265578, 8617496, 8812413, 8844497, 8889548, 9047395, 9224592, 10097114, 10349636, 10383433, 10403649, 10603348, 10699374, 10885750, 11042159, 11076861, 11217851, 11840349, 11850820, 12150890, 12271139, 12381733, 12421951, 12466851, 12477932, 12551916, 12620964, 12917329, 14512017, 14707122, 14742445, 15187104, 15249232, 15452066, 15728480, 15749884, 15781580, …	GO:0000074: regulation of progression through cell cycle, GO:0001816: cytokine production, GO:0006350: transcription, GO:0006355: regulation of transcription, DNA-dependent, GO:0009987: cellular process, GO:0045449: regulation of transcription, GO:0045944: positive regulation of transcription from RNA polymerase II promoter, GO:0005634: nucleus, GO:0005634: nucleus, GO:0005737: cytoplasm, GO:0003…		gb:AV284857 /DB_XREF=gi:16391874 /DB_XREF=AV284857 /CLONE=5031405G16 /FEA=EST /CNT=68 /TID=Mm.18453.1 /TIER=Stack /STK=17 /UG=Mm.18453 /UG_TITLE=ESTs, Highly similar to MAF2 MOUSE TRANSCRIPTION FACTOR MAF2 (M.musculus)
1425895_a_at	control	9.1451	5.0742	PPP-PPP	1141.37	152.024	224.93	83.7554	1211.8	966.9	1245.4	320.4	190.6	163.8	Id1	inhibitor of DNA binding 1	2	2 G3	152427714	U43884	15901	1361374, 1426618, 1644289, 1922066, 2156629, 7588068, 7637581, 7791788, 8001126, 8106486, 8139914, 8197168, 8224536, 8405673, 8543157, 8586447, 8628310, 8765747, 8853903, 8922523, 8989524, 8989525, 9000557, 9001238, 9372963, 9418957, 9528857, 9671467, 9695810, 9737997, 9811942, 10197587, 10349636, 10537105, 10567549, 10751173, 10922068, 11042159, 11044607, 11044609, 11076861, 11217851, 11591653, …	GO:0000122: negative regulation of transcription from RNA polymerase II promoter, GO:0007275: multicellular organismal development, GO:0007507: heart development, GO:0016481: negative regulation of transcription, GO:0030509: BMP signaling pathway, GO:0043433: negative regulation of transcription factor activity, GO:0045449: regulation of transcription, GO:0045765: regulation of angiogenesis, GO:0…	04350: TGF-beta signaling pathway	gb:U43884.1 /DB_XREF=gi:1244792 /GEN=Id1B /FEA=FLmRNA /CNT=3 /TID=Mm.444.2 /TIER=FL /STK=1 /UG=Mm.444 /LL=15901 /DEF=Mus musculus transcription factor Id1B (Id1B) mRNA, complete cds. /PROD=Id1B /FL=gb:U43884.1
1456875_at	control	9.1295	2.2109	PPP-PPP	546.17	33.4638	247.03	45.8358	517	582.7	538.8	284.7	260.4	196	1810013L24Rik	RIKEN cDNA 1810013L24 gene	16	16 A3		AV232053	69053	8889548, 10349636, 10922068, 11042159, 11076861, 11217851, 11544199, 12466851, 12477932, 15226823, 16141072, 16141073			gb:AV232053 /DB_XREF=gi:16385919 /DB_XREF=AV232053 /CLONE=4632411K06 /FEA=EST /CNT=14 /TID=Mm.26499.1 /TIER=ConsEnd /STK=6 /UG=Mm.26499 /UG_TITLE=ESTs
1440096_at	control	9.1239	13.7177	PPP-AAA	170.1	27.1757	12.4	12.5583	145.9	199.5	164.9	5	26.9	5.3	Ecm2	extracellular matrix protein 2, female organ and adipocyte specific	13	13 B1	49516746	BB005258	407800	10349636, 11042159, 11076861, 11217851, 12466851, 12477932, 16141072, 16141073	GO:0005515: protein binding		gb:BB005258 /DB_XREF=gi:16214892 /DB_XREF=BB005258 /CLONE=4732465J06 /FEA=EST /CNT=6 /TID=Mm.106335.1 /TIER=ConsEnd /STK=6 /UG=Mm.106335 /UG_TITLE=ESTs
1438933_x_at	control	9.1193	4.4875	PPP-PAM	496.47	55.566	110.63	47.7779	453.8	559.3	476.3	141.5	134.8	55.6	Rasgrp2	RAS, guanyl releasing protein 2	19		6400566	BE688720	19395	9341881, 9789079, 10349636, 11042159, 11076861, 11217851, 12239348, 12466851, 12477932, 12817022, 15334074, 16141072, 16141073	GO:0001558: regulation of cell growth, GO:0007242: intracellular signaling cascade, GO:0007264: small GTPase mediated signal transduction, GO:0007265: Ras protein signal transduction, GO:0051056: regulation of small GTPase mediated signal transduction, GO:0005622: intracellular, GO:0005829: cytosol, GO:0005886: plasma membrane, GO:0005085: guanyl-nucleotide exchange factor activity, GO:0005088: R…	04010: MAPK signaling pathway	gb:BE688720 /DB_XREF=gi:10076344 /DB_XREF=uw38c03.x1 /CLONE=IMAGE:3418948 /FEA=EST /CNT=9 /TID=Mm.20884.2 /TIER=Stack /STK=9 /UG=Mm.20884 /LL=19395 /UG_GENE=Rasgrp2 /UG_TITLE=RAS, guanyl releasing protein 2
1454173_at	control	9.1099	3.3728	APA-AAA	38.9	2.9513	11.53	4.2852	41.9	38.8	36	10.3	8	16.3	Sh2d4b	SH2 domain containing 4B	14	14 B	-39724581	AK020787	328381	10349636, 11042159, 11076861, 11217851, 12466851, 16141072, 16141073	GO:0007242: intracellular signaling cascade		gb:AK020787.1 /DB_XREF=gi:12861481 /FEA=mRNA /CNT=1 /TID=Mm.160026.1 /TIER=ConsEnd /STK=0 /UG=Mm.160026 /LL=77932 /UG_GENE=A430109M18Rik /UG_TITLE=RIKEN cDNA A430109M18 gene /DEF=Mus musculus 0 day neonate thymus cDNA, RIKEN full-length enriched library, clone:A430109M18:unclassifiable, full insert sequence.
1424015_at	control	9.1035	4.2853	PPP-PPP	5811.6	650.364	1356.17	543.707	5361.8	6557.3	5515.7	1863.9	1422.1	782.5	Rab6ip1	Rab6 interacting protein 1	7	7 E3	-109684959	BC022119	19347	7631419, 7782346, 10349636, 11042159, 11076861, 11166556, 11217851, 12465718, 12466851, 12477932, 16141072, 16141073	GO:0005515: protein binding, GO:0017137: Rab GTPase binding		gb:BC022119.1 /DB_XREF=gi:18380997 /FEA=FLmRNA /CNT=141 /TID=Mm.21904.1 /TIER=FL+Stack /STK=63 /UG=Mm.21904 /LL=19347 /UG_GENE=Rab6ip1 /DEF=Mus musculus, clone MGC:37737 IMAGE:5067385, mRNA, complete cds. /PROD=Unknown (protein for MGC:37737) /FL=gb:BC022119.1
1422673_at	control	9.0989	8.9645	PPP-PAA	1060.2	132.163	118.27	121.174	917.9	1179.1	1083.6	258.1	44.1	52.6	Prkcm	protein kinase C, mu	12	12 C1	-51217853	NM_008858	18760	2266135, 7836415, 8078925, 9854032, 10882525, 12466851, 14573624, 14613966, 15190080, 15192707, 15623513, 16098040, 16111639, 16377259, 16503160, 16537572, 16713972	GO:0006468: protein amino acid phosphorylation, GO:0007242: intracellular signaling cascade, GO:0005615: extracellular space, GO:0000166: nucleotide binding, GO:0004672: protein kinase activity, GO:0004674: protein serine/threonine kinase activity, GO:0004713: protein-tyrosine kinase activity, GO:0005524: ATP binding, GO:0008270: zinc ion binding, GO:0016301: kinase activity, GO:0016740: transfer…		gb:NM_008858.1 /DB_XREF=gi:6679350 /GEN=Prkcm /FEA=FLmRNA /CNT=36 /TID=Mm.990.1 /TIER=FL+Stack /STK=20 /UG=Mm.990 /LL=18760 /DEF=Mus musculus protein kinase C, mu (Prkcm), mRNA. /PROD=protein kinase C, mu /FL=gb:NM_008858.1
1435264_at	control	9.0964	7.1553	PPP-PPA	893.93	124.622	124.93	76.8755	907.7	763	1011.1	176.7	161.5	36.6	Emilin2	elastin microfibril interfacer 2	17	17 E1.3	-71157029	BB811788	246707	10349636, 11042159, 11076861, 11217851, 12221002, 12466851, 12477932, 12837629, 14996434, 16141072, 16141073	GO:0007155: cell adhesion, GO:0005576: extracellular region, GO:0005578: extracellular matrix (sensu Metazoa), GO:0005515: protein binding		gb:BB811788 /DB_XREF=gi:16984417 /DB_XREF=BB811788 /CLONE=G730011I07 /FEA=EST /CNT=27 /TID=Mm.23462.1 /TIER=Stack /STK=18 /UG=Mm.23462 /UG_TITLE=ESTs, Moderately similar to extracellular glycoprotein EMILIN-2 precursor (Homo sapiens) (H.sapiens)
1441584_at	control	9.0932	5.8192	PPP-PPP	729.53	112.443	125.37	24.4962	804.1	600.2	784.3	140.4	138.6	97.1	Fli1	Friend leukemia integration 1	9	9 A4	-32171774	BB555654	14247	1445800, 1845910, 1916807, 2044959, 2304901, 7558020, 8439553, 8439730, 8474456, 8524263, 8570653, 8649378, 8679708, 8838310, 8987796, 10095055, 10199918, 10349636, 10523830, 10640707, 10704859, 10757781, 10891501, 10981960, 11042159, 11076861, 11118632, 11217851, 11503960, 12065417, 12200699, 12379474, 12466851, 12466854, 12509448, 12527908, 14570912, 14635793, 14647452, 15367440, 15528390, 1555…	GO:0006350: transcription, GO:0006355: regulation of transcription, DNA-dependent, GO:0008015: circulation, GO:0009887: organ morphogenesis, GO:0009987: cellular process, GO:0005634: nucleus, GO:0003677: DNA binding, GO:0003700: transcription factor activity, GO:0016563: transcriptional activator activity, GO:0043565: sequence-specific DNA binding		gb:BB555654 /DB_XREF=gi:16448590 /DB_XREF=BB555654 /CLONE=E330020G21 /FEA=EST /CNT=4 /TID=Mm.170425.1 /TIER=ConsEnd /STK=4 /UG=Mm.170425 /UG_TITLE=ESTs
1451543_at	control	9.0739	3.4924	PPP-PPA	285.1	13.2488	81.63	36.5088	291.2	269.9	294.2	89.3	113.7	41.9	Fbxo21	F-box protein 21	5	5 F	118237799	BC021871	231670	8889548, 10349636, 10725249, 10922068, 11042159, 11076861, 11217851, 12465718, 12466851, 12477932, 15520277, 15782199, 16141072, 16141073	GO:0006512: ubiquitin cycle		gb:BC021871.1 /DB_XREF=gi:18256899 /FEA=FLmRNA /CNT=46 /TID=Mm.216305.1 /TIER=FL+Stack /STK=10 /UG=Mm.216305 /DEF=Mus musculus, Similar to F-box only protein 21, clone MGC:28066 IMAGE:3709413, mRNA, complete cds. /PROD=Similar to F-box only protein 21 /FL=gb:BC021871.1
1460365_a_at	control	9.0713	16.84	PPP-AAA	406.97	68.4697	24.17	25.5768	380.6	355.6	484.7	53.7	9.3	9.5	Dnm1	dynamin 1	2	2 B	-32130481	L31397	13429	8653788, 8889548, 9143509, 9143510, 10349636, 10398046, 11042120, 11042159, 11076861, 11172053, 11217851, 11879655, 11956154, 12198492, 12456676, 12466851, 12477932, 15123724, 15872089, 15895076, 16028072, 16141072, 16141073, 16319076	GO:0006897: endocytosis, GO:0005874: microtubule, GO:0030117: membrane coat, GO:0000166: nucleotide binding, GO:0003774: motor activity, GO:0003924: GTPase activity, GO:0005515: protein binding, GO:0005525: GTP binding, GO:0016301: kinase activity, GO:0016740: transferase activity, GO:0016787: hydrolase activity, GO:0042802: identical protein binding		gb:L31397.1 /DB_XREF=gi:487856 /GEN=BreDnm19 /FEA=FLmRNA /CNT=57 /TID=Mm.16080.1 /TIER=FL+Stack /STK=18 /UG=Mm.16080 /LL=13429 /DEF=Mus musculus dynamin (BreDnm19) mRNA, complete cds. /PROD=dynamin /FL=gb:L31397.1
1422982_at	control	9.0708	3.6981	PPP-PPP	476.07	64.9278	128.73	13.5297	404	494.2	530	131.6	114	140.6	Ar	androgen receptor	X	X C3	94352468	NM_013476	11835	123850, 179788, 564230, 744116, 939201, 1385960, 1423334, 1628813, 1632191, 1675191, 1681426, 1686053, 1740345, 1772416, 1797229, 1822400, 1883336, 1924321, 1974879, 2034278, 2034279, 2041777, 2055107, 2178222, 2293028, 2403358, 2721933, 2739660, 2766275, 2895445, 2899541, 2912700, 3408476, 4108517, 4354015, 5284427, 5289439, 5452809, 6105650, 6887886, 7262021, 7511785, 7590750, 7599695, 7719348,…	GO:0001701: embryonic development (sensu Mammalia), GO:0006350: transcription, GO:0006355: regulation of transcription, DNA-dependent, GO:0008584: male gonad development, GO:0009987: cellular process, GO:0016049: cell growth, GO:0019102: male somatic sex determination, GO:0030521: androgen receptor signaling pathway, GO:0045449: regulation of transcription, GO:0005634: nucleus, GO:0005634: nucleu…		gb:NM_013476.1 /DB_XREF=gi:7304900 /GEN=Ar /FEA=FLmRNA /CNT=18 /TID=Mm.4470.1 /TIER=FL /STK=0 /UG=Mm.4470 /LL=11835 /DEF=Mus musculus androgen receptor (Ar), mRNA. /PROD=androgen receptor /FL=gb:NM_013476.1 gb:M37890.1
1419420_at	control	9.054	24.0735	PPP-APA	1681.93	304.91	69.87	46.2065	1489.7	1522.6	2033.5	52.2	122.3	35.1	St6galnac5	ST6 (alpha-N-acetyl-neuraminyl-2,3-beta-galactosyl-1,3)-N-acetylgalactosaminide alpha-2,6-sialyltransferase 5	3	3 H3	-152757273	NM_012028	26938	8889548, 10349636, 10521438, 10601645, 11042159, 11076861, 11125038, 11217851, 12466851, 12477932, 16141072, 16141073	GO:0006486: protein amino acid glycosylation, GO:0005615: extracellular space, GO:0016020: membrane, GO:0016021: integral to membrane, GO:0030173: integral to Golgi membrane, GO:0008373: sialyltransferase activity, GO:0016740: transferase activity, GO:0016757: transferase activity, transferring glycosyl groups	00604: Glycosphingolipid biosynthesis - ganglioseries, 01031: Glycan structures - biosynthesis 2	gb:AB028840.1 /DB_XREF=gi:6691442 /GEN=ST6GalNAc V /FEA=FLmRNA /CNT=31 /TID=Mm.40915.1 /TIER=FL+Stack /STK=10 /UG=Mm.40915 /LL=26938 /DEF=Mus musculus ST6GalNAc V mRNA for GalNAc alpha-2, 6-sialyltransferase V, complete cds. /PROD=GalNAc alpha-2, 6-sialyltransferase V /FL=gb:AB030836.1 gb:AB028840.1 gb:NM_012028.1
1420398_at	control	9.0492	6.2338	PPP-PPA	244.37	26.0849	39.2	29.3542	216.5	248.4	268.2	50.9	60.9	5.8	Rgs18	regulator of G-protein signaling 18	1	1 F	-146515060	BB139986	64214	10349636, 11042159, 11042171, 11076861, 11217851, 11342430, 11563974, 11829488, 12466851, 12477932, 15489855, 16141072, 16141073	GO:0007186: G-protein coupled receptor protein signaling pathway, GO:0008277: regulation of G-protein coupled receptor protein signaling pathway, GO:0009968: negative regulation of signal transduction, GO:0005737: cytoplasm, GO:0004871: signal transducer activity, GO:0005096: GTPase activator activity, GO:0016299: regulator of G-protein signaling activity		gb:NM_022881.1 /DB_XREF=gi:12738844 /GEN=Rgs18 /FEA=FLmRNA /CNT=21 /TID=Mm.130892.1 /TIER=FL /STK=5 /UG=Mm.130892 /LL=64214 /DEF=Mus musculus regulator of G-protein signaling 18 (Rgs18), mRNA. /PROD=regulator of G-protein signaling 18 /FL=gb:NM_022881.1 gb:AF302685.1 gb:AB042807.1
1460592_at	control	9.0486	3.6222	PPP-PPP	1489.57	168.987	411.23	118.528	1483.3	1661.6	1323.8	453.8	277.3	502.6	Epb4.1l1	erythrocyte protein band 4.1-like 1	2	2 H1	156112492, 156167277	BI684958	13821	7983158, 8889548, 9828140, 10349636, 10414974, 10922068, 11042159, 11076861, 11217851, 12444087, 12466851, 12477932, 12693553, 15364918, 15834631, 15893517, 16110338, 16141072, 16141073, 16487933	GO:0030866: cortical actin cytoskeleton organization and biogenesis, GO:0005737: cytoplasm, GO:0005856: cytoskeleton, GO:0016020: membrane, GO:0003779: actin binding, GO:0005198: structural molecule activity, GO:0005515: protein binding, GO:0008092: cytoskeletal protein binding	04530: Tight junction	gb:BI684958 /DB_XREF=gi:15647586 /DB_XREF=603307614F1 /CLONE=IMAGE:5343866 /FEA=EST /CNT=18 /TID=Mm.20852.3 /TIER=Stack /STK=14 /UG=Mm.20852 /LL=13821 /UG_GENE=Epb4.1l1 /UG_TITLE=erythrocyte protein band 4.1-like 1
1422472_at	control	9.0406	3.728	PPP-PPP	364.6	47.8925	97.8	17.8628	337.3	419.9	336.6	109	107.2	77.2	Pex13	peroxisomal biogenesis factor 13	11	11 A3.3	-23546478	BB045429	72129	8889548, 10349636, 11042159, 11076861, 11217851, 11829486, 11857814, 12174196, 12466851, 12477932, 12897163, 15782199, 16141072, 16141073, 16449325, 16919269	GO:0006625: protein targeting to peroxisome, GO:0006810: transport, GO:0006886: intracellular protein transport, GO:0015031: protein transport, GO:0016560: protein import into peroxisome matrix, docking, GO:0005624: membrane fraction, GO:0005777: peroxisome, GO:0005779: integral to peroxisomal membrane, GO:0016020: membrane, GO:0016021: integral to membrane, GO:0000268: peroxisome targeting seque…		gb:BB045429 /DB_XREF=gi:16259349 /DB_XREF=BB045429 /CLONE=6030495B12 /FEA=FLmRNA /CNT=157 /TID=Mm.28912.1 /TIER=ConsEnd /STK=1 /UG=Mm.28912 /LL=72129 /UG_GENE=Pex13 /UG_TITLE=peroxisomal biogenesis factor 13 /FL=gb:NM_023651.1 gb:AF329877.2
1422412_x_at	control	9.0394	7.6539	PPP-AAA	146.7	23.5561	19.17	6.501	121.4	150.7	168	24.1	21.6	11.8	Ear3	eosinophil-associated, ribonuclease A family, member 3			42982753	NM_017388	53876	9336452, 15058383	GO:0003676: nucleic acid binding, GO:0004518: nuclease activity, GO:0004519: endonuclease activity, GO:0004522: pancreatic ribonuclease activity, GO:0016787: hydrolase activity		gb:NM_017388.1 /DB_XREF=gi:8393282 /GEN=Ear3 /FEA=FLmRNA /CNT=1 /TID=Mm.195444.1 /TIER=FL /STK=1 /UG=Mm.195444 /LL=53876 /DEF=Mus musculus eosinophil-associated ribonuclease 3 (Ear3), mRNA. /PROD=eosinophil-associated ribonuclease 3 /FL=gb:NM_017388.1
1447707_s_at	control	9.0346	5.4976	PPP-PPP	5284.7	821.441	961.27	110.615	4378.1	5979.5	5496.5	1040	1009	834.8	Pde2a	phosphodiesterase 2A, cGMP-stimulated	7	7 E2	101295529	BB367174	207728	8889548, 10349636, 10922068, 11042159, 11076861, 11217851, 12466851, 12477932, 15210692, 16141072, 16141073	GO:0007165: signal transduction, GO:0016020: membrane, GO:0003824: catalytic activity, GO:0004114: 3',5'-cyclic-nucleotide phosphodiesterase activity, GO:0016787: hydrolase activity	00230: Purine metabolism	gb:BB367174 /DB_XREF=gi:9079003 /DB_XREF=BB367174 /CLONE=C130036M13 /FEA=EST /CNT=2 /TID=Mm.167414.1 /TIER=ConsEnd /STK=2 /UG=Mm.167414 /UG_TITLE=ESTs
1448469_at	control	9.0328	8.9141	PPP-AAA	1868.1	288.707	209.57	133.373	1612.6	2181.3	1810.4	356.3	176.7	95.7	Nid1	nidogen 1	13	13 A1	13229816	X14480	18073	1672300, 1725162, 2496973, 3264556, 7516699, 7601446, 7782091, 7789273, 8224873, 8286607, 8359228, 8530056, 8562707, 8613743, 8650191, 8673129, 8717042, 8854868, 8952226, 8995276, 9027500, 9043083, 9070932, 9070936, 9096311, 9151677, 9524110, 9570961, 9827803, 9833687, 9885251, 10349636, 10544250, 10607900, 10625553, 10639489, 10716744, 10922068, 10958695, 11042159, 11076861, 11217851, 11472062, …	GO:0007155: cell adhesion, GO:0007160: cell-matrix adhesion, GO:0008218: bioluminescence, GO:0018298: protein-chromophore linkage, GO:0005578: extracellular matrix (sensu Metazoa), GO:0005604: basement membrane, GO:0005604: basement membrane, GO:0005604: basement membrane, GO:0005615: extracellular space, GO:0016020: membrane, GO:0005509: calcium ion binding, GO:0005515: protein binding		gb:X14480.1 /DB_XREF=gi:53383 /FEA=FLmRNA /CNT=287 /TID=Mm.4691.1 /TIER=Stack /STK=132 /UG=Mm.4691 /LL=18073 /UG_GENE=Nid1 /UG_TITLE=nidogen 1 /DEF=Mouse mRNA for nidogen. /FL=gb:NM_010917.1
1450184_s_at	control	9.0286	4.0564	PPP-AAA	314.23	23.1958	77.47	39.0518	333	288.3	321.4	121.4	64.3	46.7	Tef	thyrotroph embryonic factor	15	15 E1	81638727, 81630071	NM_017376	21685	1916262, 7550318, 7835883, 7903570, 8661743, 8827514, 9073512, 9196007, 9226367, 9339368, 9756919, 9789033, 10341080, 10349636, 10409670, 10799536, 10922068, 11042159, 11076861, 11217851, 12466851, 12477932, 12791695, 14702338, 15175240, 15181539, 15306695, 15782199, 16141072, 16141073, 16814730	GO:0006350: transcription, GO:0006355: regulation of transcription, DNA-dependent, GO:0045944: positive regulation of transcription from RNA polymerase II promoter, GO:0048511: rhythmic process, GO:0005634: nucleus, GO:0003677: DNA binding, GO:0003690: double-stranded DNA binding, GO:0003700: transcription factor activity, GO:0005515: protein binding, GO:0016563: transcriptional activator activit…		gb:NM_017376.1 /DB_XREF=gi:8394434 /GEN=Tef /FEA=FLmRNA /CNT=12 /TID=Mm.154152.1 /TIER=FL /STK=2 /UG=Mm.154152 /LL=21685 /DEF=Mus musculus thyrotroph embryonic factor (Tef), mRNA. /PROD=thyrotroph embryonic factor /FL=gb:NM_017376.1 gb:AF194420.1
1448250_at	control	9.02	6.967	PPP-MPP	1231.07	201.333	176.7	21.3698	1292.4	1394.6	1006.2	194.5	182.6	153	9030425E11Rik	RIKEN cDNA 9030425E11 gene	9	9 A5.1	40437032	BG072972	71566	8889548, 10349636, 10922068, 11042159, 11076861, 11125038, 11217851, 12466851, 12477932, 14573622, 15563274, 16141072, 16141073, 16618939	GO:0005615: extracellular space, GO:0016020: membrane, GO:0016021: integral to membrane		gb:NM_133733.1 /DB_XREF=gi:19526927 /GEN=9030425E11Rik /FEA=FLmRNA /CNT=196 /TID=Mm.41765.1 /TIER=FL+Stack /STK=113 /UG=Mm.41765 /LL=71566 /DEF=Mus musculus RIKEN cDNA 9030425E11 gene (9030425E11Rik), mRNA. /PROD=RIKEN cDNA 9030425E11 /FL=gb:BC026447.1 gb:AB040490.1 gb:NM_133733.1
1460560_at	control	8.9933	1.5306	MPP-AAA	468.17	30.1805	305.87	8.1365	445.4	456.7	502.4	298.5	314.6	304.5	Bahcc1	BAH domain and coiled-coil containing 1	11	11 E2	120095225	AI851982	268515	10349636, 11042159, 11076861, 11217851, 12466851, 12477932, 15582152, 16141072, 16141073, 16807365	GO:0003677: DNA binding		gb:AI851982 /DB_XREF=gi:5495888 /DB_XREF=UI-M-BH0-aiq-d-04-0-UI.s1 /CLONE=UI-M-BH0-aiq-d-04-0-UI /FEA=EST /CNT=63 /TID=Mm.30457.1 /TIER=Stack /STK=39 /UG=Mm.30457 /UG_TITLE=ESTs
1423635_at	control	8.9861	5.1893	PPP-PPP	710.77	104.056	136.97	37.4755	690.4	618.4	823.5	179.7	121.5	109.7	Bmp2	bone morphogenetic protein 2	2	2 F2	133244639	AV239587	12156	1354647, 1460021, 1468569, 1613559, 1916246, 1970330, 2226202, 2347591, 2481605, 3201241, 7577436, 7589793, 7605753, 7657163, 7799920, 7811286, 7848824, 7902327, 7911662, 7916325, 8018727, 8104708, 8111131, 8118101, 8177505, 8536632, 8616889, 8617512, 8651889, 8674409, 8684466, 8698813, 8769660, 8787747, 8808404, 8854867, 8896987, 8898212, 8898217, 9003457, 9056639, 9152009, 9152011, 9187146, 918…	GO:0001503: ossification, GO:0001649: osteoblast differentiation, GO:0001658: ureteric bud branching, GO:0001837: epithelial to mesenchymal transition, GO:0001837: epithelial to mesenchymal transition, GO:0006954: inflammatory response, GO:0007179: transforming growth factor beta receptor signaling pathway, GO:0007275: multicellular organismal development, GO:0008285: negative regulation of cell …	04060: Cytokine-cytokine receptor interaction, 04340: Hedgehog signaling pathway, 04350: TGF-beta signaling pathway, 05217: Basal cell carcinoma	gb:AV239587 /DB_XREF=gi:6192094 /DB_XREF=AV239587 /CLONE=4732434O21 /FEA=FLmRNA /CNT=28 /TID=Mm.7486.1 /TIER=Stack /STK=8 /UG=Mm.7486 /LL=12156 /UG_GENE=Bmp2 /UG_TITLE=bone morphogenetic protein 2 /FL=gb:NM_007553.1
1456267_at	control	8.9798	1.8757	PPP-PAA	198.13	13.1554	105.63	12.0525	192.9	213.1	188.4	92.2	115.5	109.2	AI451606	expressed sequence AI451606	8			BG074151	102085	10922068			gb:BG074151 /DB_XREF=gi:12556731 /DB_XREF=H3131F02-3 /CLONE=H3131F02 /FEA=EST /CNT=23 /TID=Mm.142524.1 /TIER=Stack /STK=12 /UG=Mm.142524 /LL=102085 /UG_GENE=AI451606 /UG_TITLE=expressed sequence AI451606
1435603_at	control	8.9711	8.9421	PPP-AAA	668.87	111.457	74.8	27.0668	739.8	726.4	540.4	100.3	77.7	46.4	Sned1	sushi, nidogen and EGF-like domains 1	1	1 D	95066246	BB487754	208777	10349636, 11042159, 11076861, 11217851, 12466851, 12477932, 15162516, 16141072, 16141073	GO:0007160: cell-matrix adhesion, GO:0005509: calcium ion binding		gb:BB487754 /DB_XREF=gi:16441555 /DB_XREF=BB487754 /CLONE=D430044C15 /FEA=EST /CNT=30 /TID=Mm.52809.1 /TIER=Stack /STK=15 /UG=Mm.52809 /LL=98279 /UG_GENE=AI197264 /UG_TITLE=expressed sequence AI197264
1419249_at	control	8.9652	5.0502	PPP-PPP	1402.93	170.975	277.8	134.231	1221.2	1560.6	1427	339.6	370	123.8	Pftk1	PFTAIRE protein kinase 1	5	5 A1	-4809739	AI327038	18647	9202329, 9205131, 9547506, 10349636, 10384057, 10433968, 11042159, 11076861, 11217851, 12072416, 12466851, 12477932, 14621295, 15761153, 16141072, 16141073	GO:0006468: protein amino acid phosphorylation, GO:0005634: nucleus, GO:0000166: nucleotide binding, GO:0004672: protein kinase activity, GO:0004674: protein serine/threonine kinase activity, GO:0004674: protein serine/threonine kinase activity, GO:0004713: protein-tyrosine kinase activity, GO:0005524: ATP binding, GO:0016301: kinase activity, GO:0016740: transferase activity		gb:NM_011074.1 /DB_XREF=gi:6755043 /GEN=Pftk1 /FEA=FLmRNA /CNT=216 /TID=Mm.6456.1 /TIER=FL+Stack /STK=11 /UG=Mm.6456 /LL=18647 /DEF=Mus musculus PFTAIRE protein kinase 1 (Pftk1), mRNA. /PROD=PFTAIRE protein kinase 1 /FL=gb:AF033655.1 gb:NM_011074.1
1420847_a_at	control	8.9636	3.8974	PPP-PPP	480.03	20.3697	123.17	65.8805	460.2	479	500.9	195.5	107.4	66.6	Fgfr2	fibroblast growth factor receptor 2	7	7 F3	-129953600	NM_010207	14183	1309608, 1315677, 1373495, 1408137, 1667382, 1711190, 1846048, 2161540, 2165484, 2468999, 7542761, 7593222, 7604876, 7640656, 7655084, 7670492, 7789972, 7959747, 7973639, 8026341, 8045260, 8393815, 8585128, 8601314, 8619928, 8854873, 8883961, 8901049, 8903721, 8954725, 8959336, 8986768, 9010207, 9013630, 9069124, 9136983, 9202386, 9286594, 9300656, 9310332, 9385055, 9435295, 9477322, 9501086, 954…	GO:0001525: angiogenesis, GO:0002053: positive regulation of mesenchymal cell proliferation, GO:0006468: protein amino acid phosphorylation, GO:0007165: signal transduction, GO:0007267: cell-cell signaling, GO:0007435: salivary gland morphogenesis, GO:0008284: positive regulation of cell proliferation, GO:0008284: positive regulation of cell proliferation, GO:0008543: fibroblast growth factor rec…	04010: MAPK signaling pathway, 04810: Regulation of actin cytoskeleton	gb:NM_010207.1 /DB_XREF=gi:6753857 /GEN=Fgfr2 /FEA=FLmRNA /CNT=214 /TID=Mm.16340.1 /TIER=FL /STK=2 /UG=Mm.16340 /LL=14183 /DEF=Mus musculus fibroblast growth factor receptor 2 (Fgfr2), mRNA. /PROD=fibroblast growth factor receptor 2 /FL=gb:NM_010207.1 gb:M86441.1
1424266_s_at	control	8.9587	322.653	PPP-AAA	3656.73	704.715	11.33	10.3055	4189.6	2857.7	3922.9	10.1	1.7	22.2	AU018778	expressed sequence AU018778	8	8 C5	-96145369	BC013479	234564	10349636, 10725249, 10922068, 11042159, 11076861, 11217851, 12466851, 12477932, 16141072, 16141073, 16804080	GO:0004091: carboxylesterase activity, GO:0004759: serine esterase activity, GO:0016787: hydrolase activity		gb:BC013479.1 /DB_XREF=gi:15488663 /FEA=FLmRNA /CNT=96 /TID=Mm.29110.1 /TIER=FL+Stack /STK=42 /UG=Mm.29110 /DEF=Mus musculus, clone MGC:18894 IMAGE:4239756, mRNA, complete cds. /PROD=Unknown (protein for MGC:18894) /FL=gb:BC013479.1
1453062_at	control	8.9564	2.6109	PPP-AAA	607.57	64.4121	232.7	33.265	568.2	681.9	572.6	267.1	200.7	230.3	A930026I22Rik	RIKEN cDNA A930026I22 gene	19			AK020893	77970	8889548, 10349636, 11042159, 11076861, 11217851, 12466851, 16141072, 16141073			gb:AK020893.1 /DB_XREF=gi:12861619 /FEA=mRNA /CNT=15 /TID=Mm.24136.1 /TIER=Stack /STK=10 /UG=Mm.24136 /LL=77970 /UG_GENE=A930026I22Rik /UG_TITLE=RIKEN cDNA A930026I22 gene /DEF=Mus musculus adult retina cDNA, RIKEN full-length enriched library, clone:A930026I22:unclassifiable transcript, full insert sequence.
[truncated: 10,536 more rows]

## Sheet: tumors_vs_controls_list_2
Accession	Upregulated Class	T-Test	Fold Change	control-tumor Calls	control Mean	control Stddev	tumor Mean	tumor Stddev	control1	control2	control3	tumor1	tumor2	tumor3	Symbol	Description	Chromosome	Cytoband	Chromosome Location	GenBank	LocusLink	PubMed	Gene Ontology	Pathway	Description
1452396_at	control	0.9648	1.1468	PPP-PPP	276	30.5398	240.67	55.5936	274.2	246.4	307.4	276.2	176.6	269.2	Sfrs15	splicing factor, arginine/serine-rich 15	16	16 C3.3	-90118004	BF226494	224432	8889548, 10349636, 11042159, 11076861, 11217851, 12466851, 12466854, 12466855, 12477932, 15368895, 15782199, 16033648, 16141072, 16141073	GO:0000166: nucleotide binding, GO:0003676: nucleic acid binding		gb:BF226494 /DB_XREF=gi:11134251 /DB_XREF=uz51g06.x1 /CLONE=IMAGE:3672634 /FEA=mRNA /CNT=51 /TID=Mm.29397.1 /TIER=Stack /STK=8 /UG=Mm.29397 /UG_TITLE=Mus musculus, Similar to pre-mRNA splicing SR protein rA4, clone IMAGE:5358991, mRNA, partial cds
[truncated: 10,999 more rows]

## Sheet: tumors_vs_controls_list_3
Accession	Upregulated Class	T-Test	Fold Change	control-tumor Calls	control Mean	control Stddev	tumor Mean	tumor Stddev	control1	control2	control3	tumor1	tumor2	tumor3	Symbol	Description	Chromosome	Cytoband	Chromosome Location	GenBank	LocusLink	PubMed	Gene Ontology	Pathway	Description
[truncated: 11,000 more rows]
